# Supplementary material for: Pd-mediated new synthesis of pyrroles: their evaluation as potential inhibitors of phosphodiesterase 4
Source: Royal Society of Chemistry journal article supplement (doi:10.1039/c1cc12321a), 2011-01-01
Supplement: c1cc12321a_2.pdf [file c1cc12321a_2.pdf]

## Copies of spectra

# **Pd-Mediated new synthesis of pyrroles: Their evaluation as potential inhibitors of phosphodiesterase 4**

G. Rajeshwar Reddy,<sup>a,b</sup> T. Ram Reddy,<sup>a</sup> Suju C. Joseph,<sup>a</sup> K. Sateesh Reddy,<sup>a</sup> L. Srinivasula Reddy,<sup>a</sup> P. Mahesh Kumar,<sup>a</sup> G. Rama krishna,<sup>c</sup> C. Malla Reddy,<sup>c</sup> D. Rambabu,<sup>d</sup> Ravikumar Kapavarapu,<sup>d</sup> Chandana Lakshmi,<sup>d</sup> Teja Meda,<sup>d</sup> Krishnapriya Kodugnati,<sup>d</sup> Kishore V. L. Parsa<sup>d</sup> and Manojit Pal<sup>d,\*</sup>

*<sup>a</sup>Custom Pharmaceutical Services, Dr. Reddy's Laboratories Limited, Bollaram Road Miyapur, Hyderabad 500 049, India*

*<sup>b</sup>Chemistry Division, Institute of Science and Technology, JNT University, Kukatpally, Hyderabad 500072, Andhra Pradesh, India*

*<sup>c</sup>Department of Chemical Sciences, Indian Institute of Science Education and Research, Kolkata, West Bengal, 741252, India.*

*<sup>d</sup>Institute of Life Sciences, University of Hyderabad Campus, Gachibowli, Hyderabad 500 046, India.*

*E-mail: manojitpal@rediffmail.com*

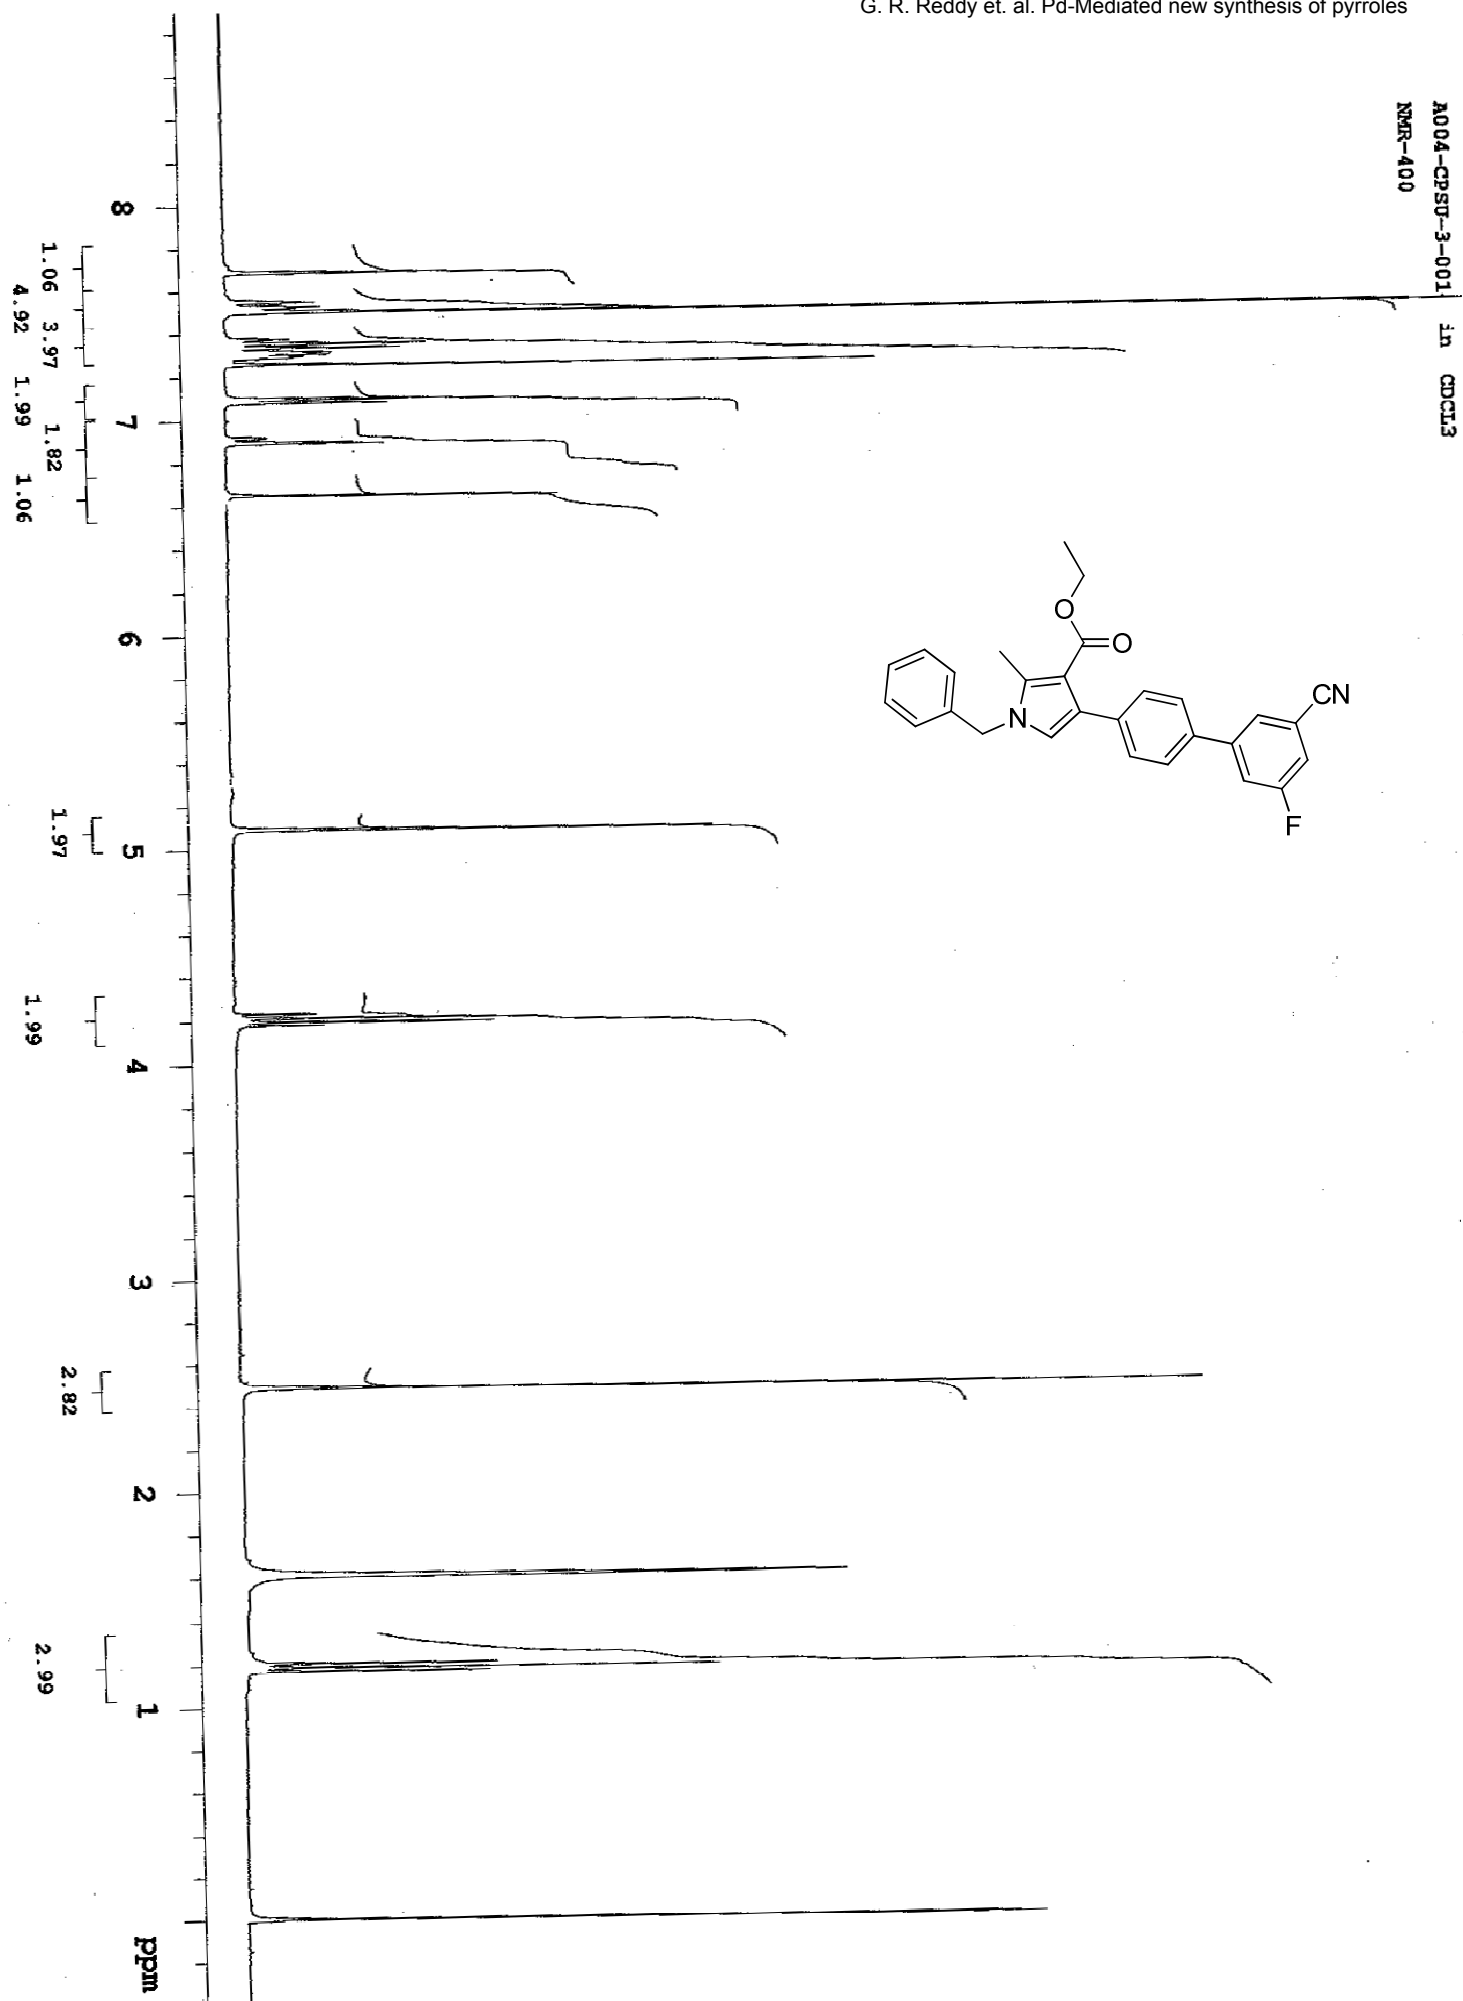

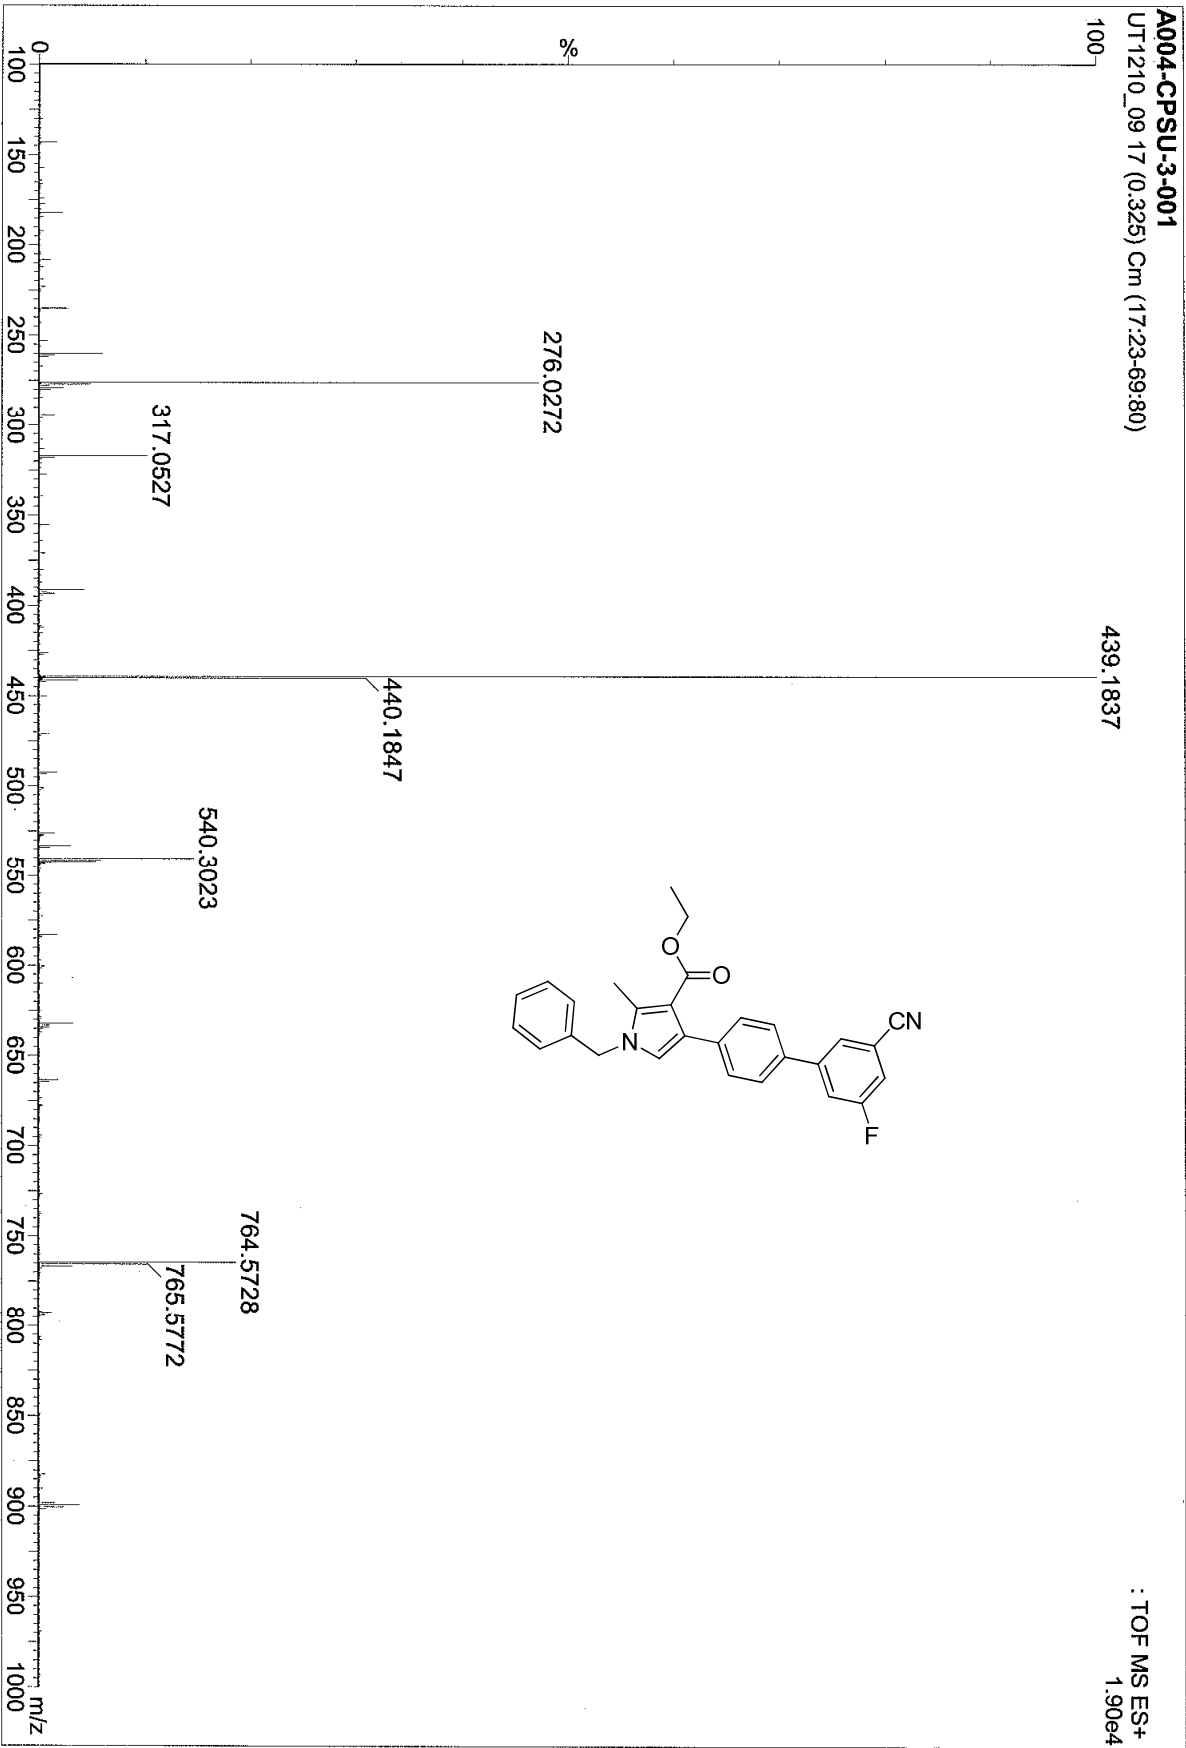

Elemental Composition Report

Single Mass Analysis

Tolerance = 5.0 PPM / DBE: min = -1.0, max = 80.0

Element prediction: Off

Number of isotope peaks used for i-FIT = 3

Monoisotopic Mass, Even Electron Ions

239 formula(e) evaluated with 1 results within limits (up to 4 best isotopic matches for each mass)

Elements Used:

C: 0-40 H: 0-55 N: 0-4 O: 0-4 F: 0-1

A004-CPSU-3-001

UT1210\_09 17 (0.325) Cm (17:23-69:80)

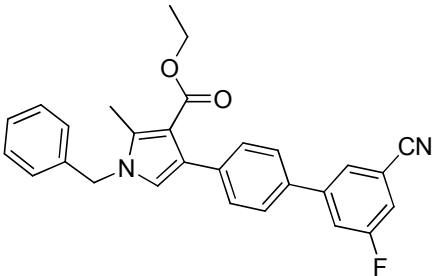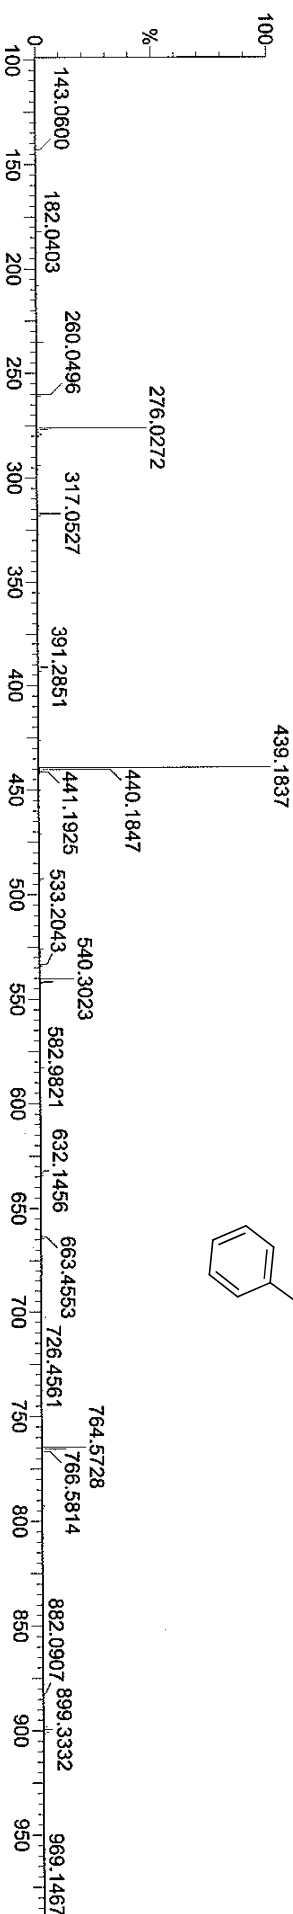

|                 |            |     |     |      |       |
|-----------------|------------|-----|-----|------|-------|
| Minimum:        |            |     |     |      |       |
| Maximum:        |            |     |     |      |       |
| Mass            | Calc. Mass | mDa | PPM | DBE  | i-FIT |
| 439.1837        | 439.1822   | 1.5 | 3.4 | 17.5 | 76.5  |
| Formula         |            |     |     |      |       |
| C28 H24 N2 O2 F |            |     |     |      |       |

1: TOF F  
1.4

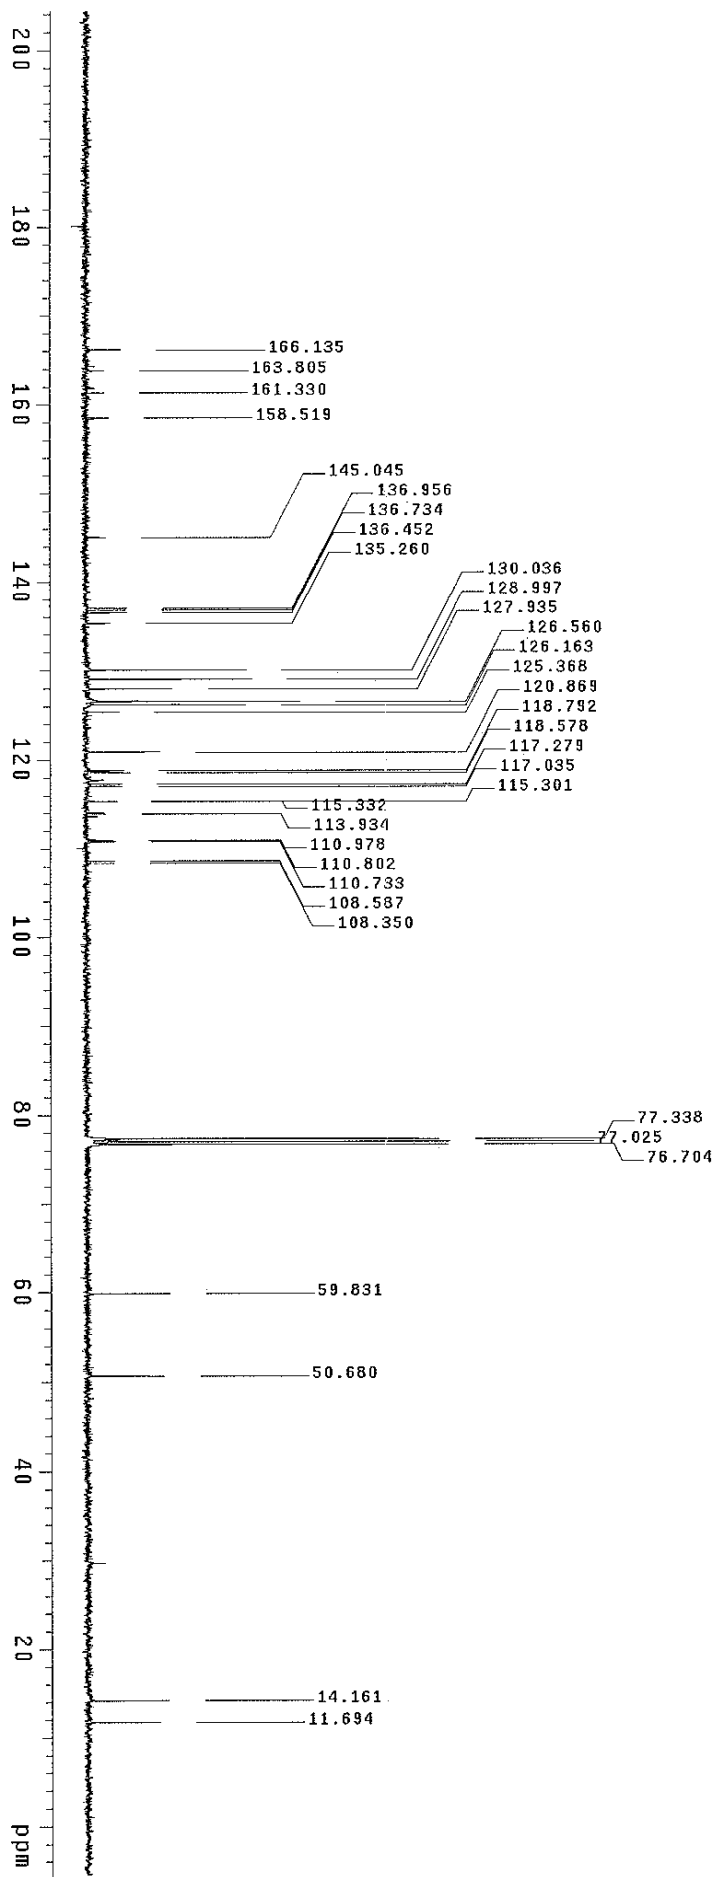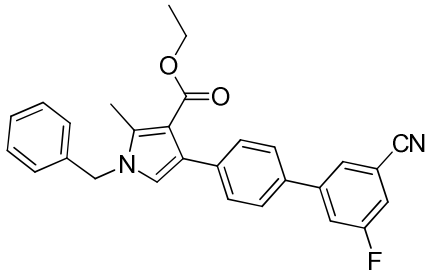

2004-CPST-3-002 in CDCl3  
NMR-400

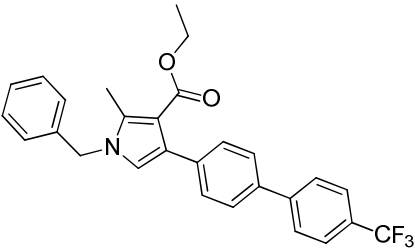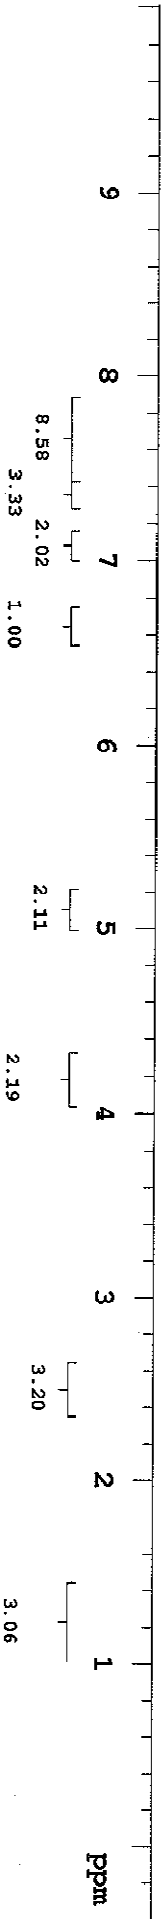

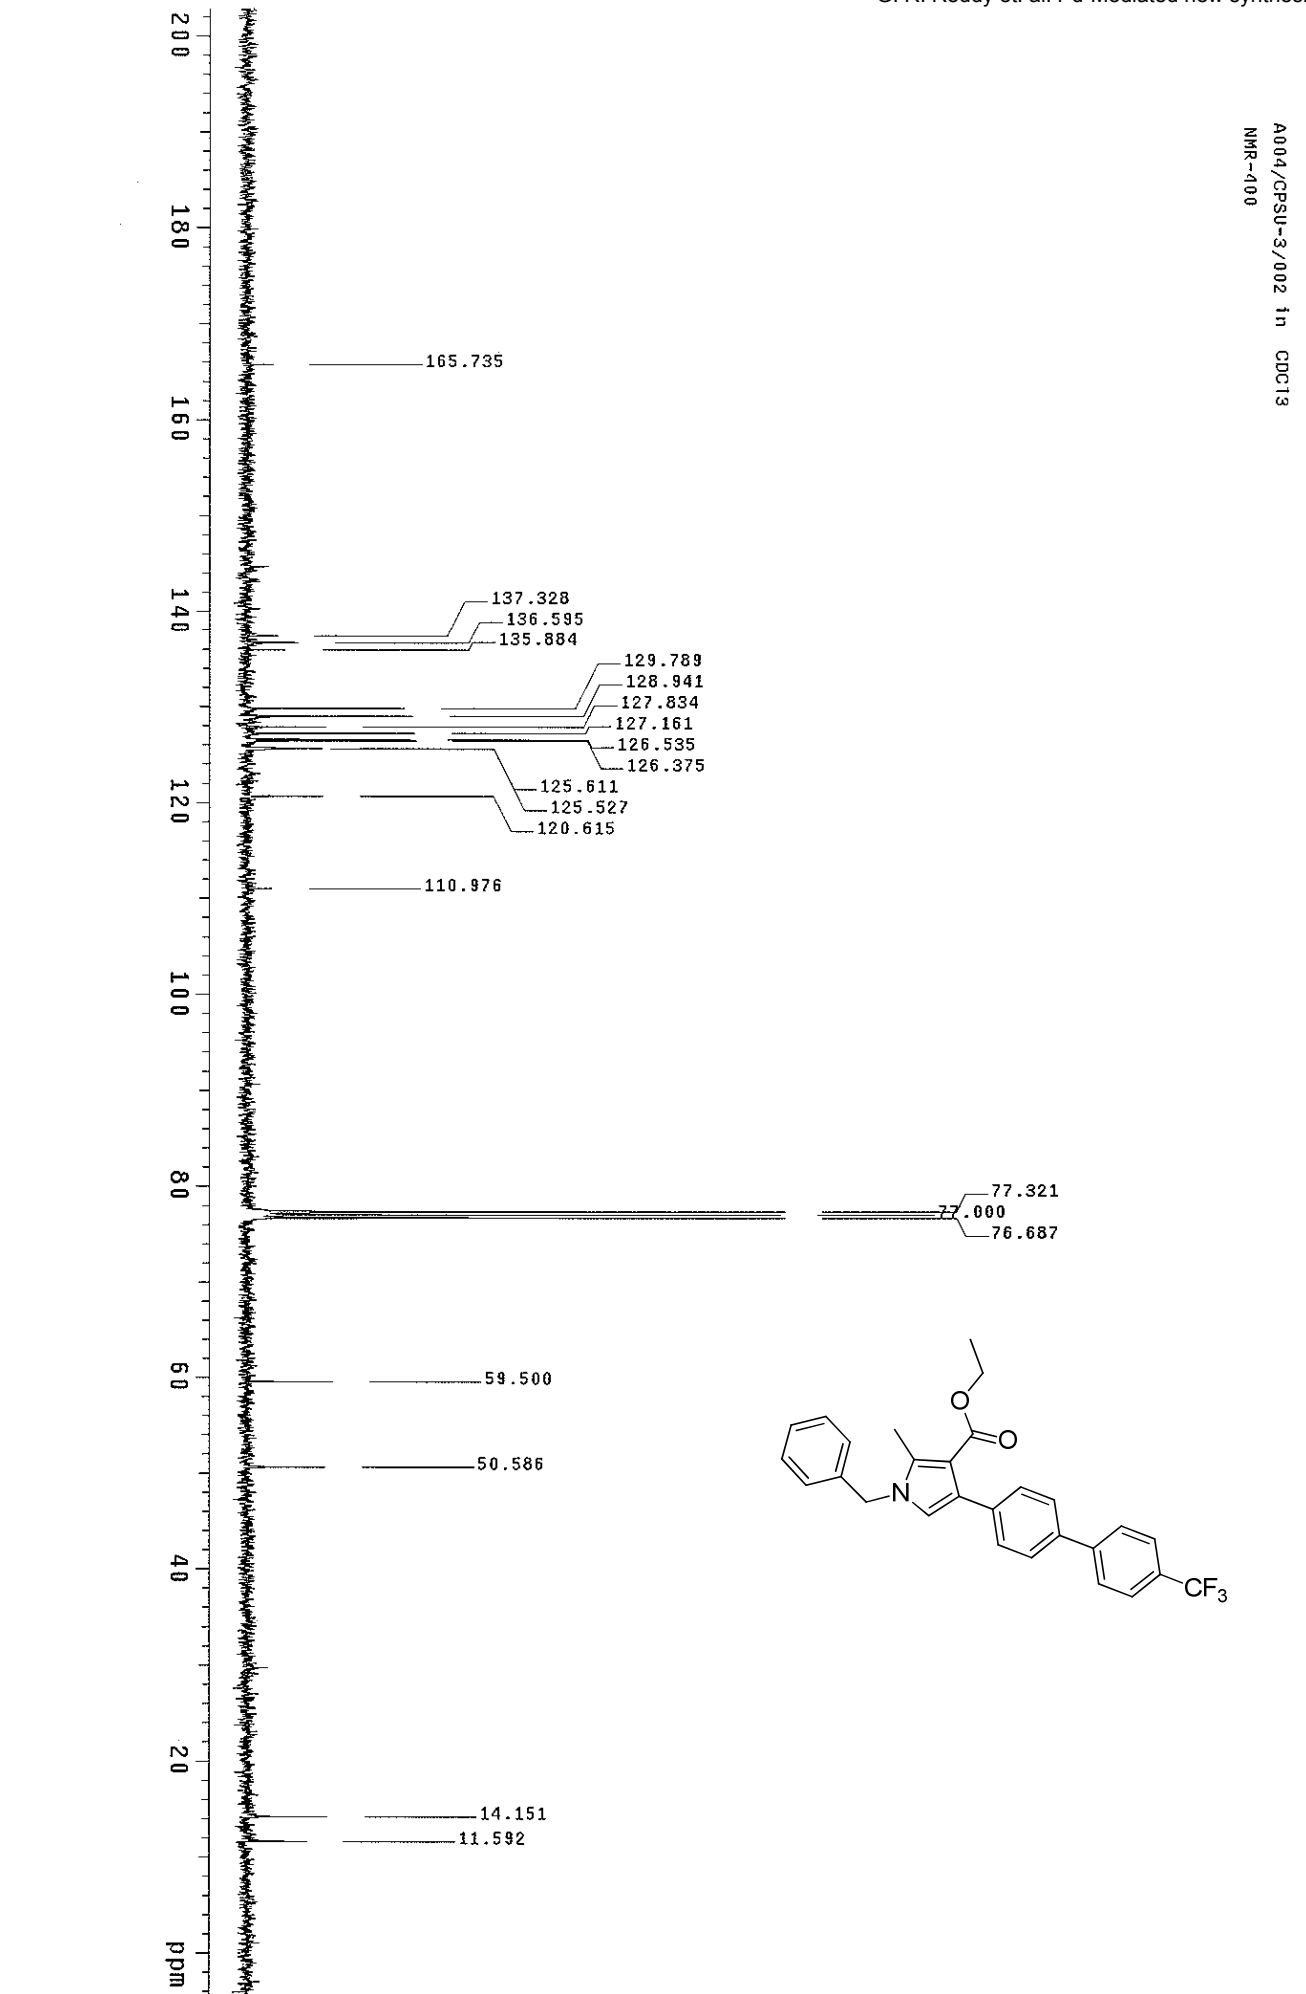

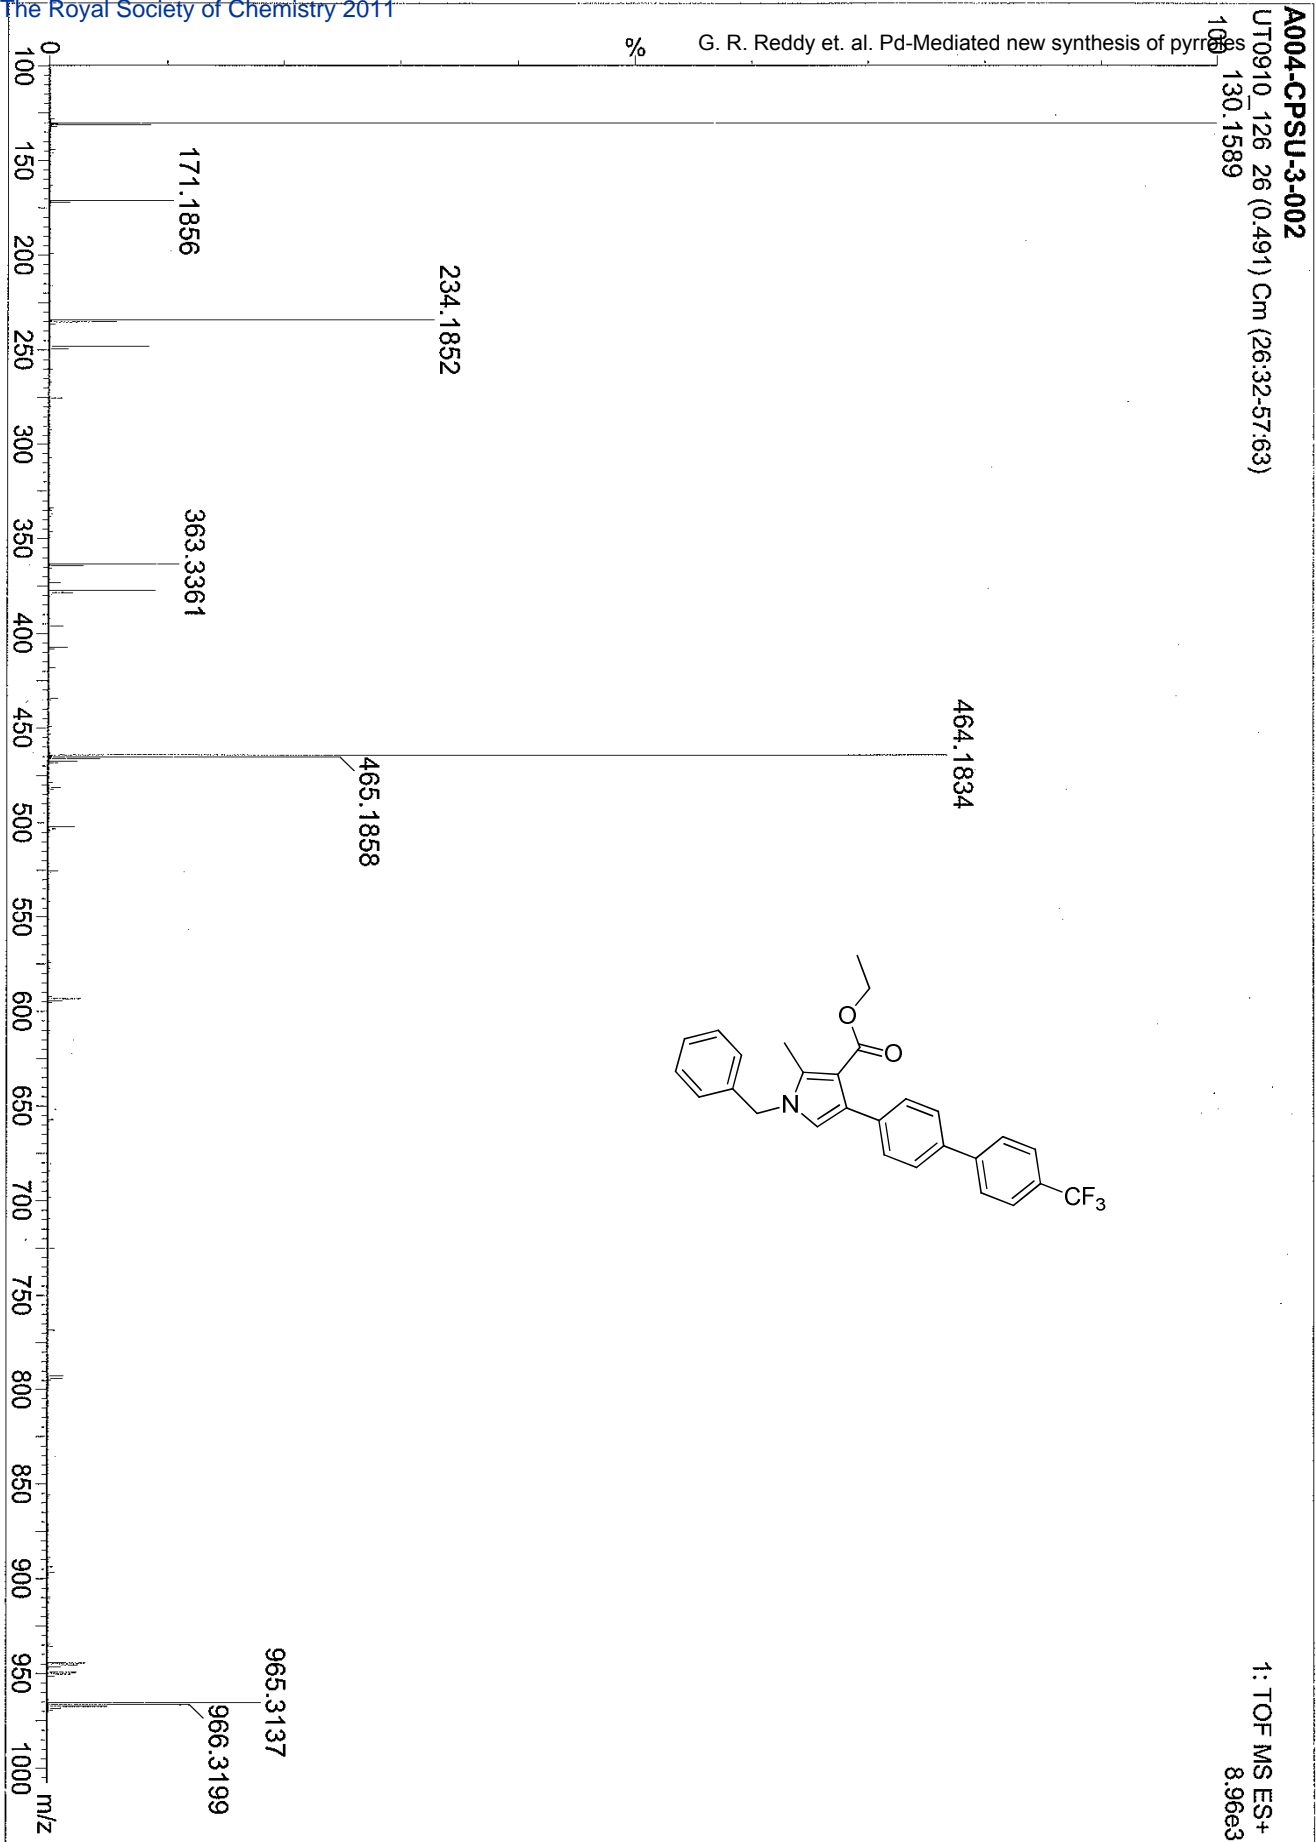



### Single Mass Analysis

Element prediction: Off

Number of isotope peaks used for i-FIT = 2

### Monoisotopic Mass, Even Electron Ions

395 formula(e) evaluated with 3 results within limits (up to 10 closest results for each mass)

Elements Used:

C: 0-35    H: 0-60    N: 0-3    O: 0-4    F: 0-3

A004-CPsU-3-002

UT0910\_126 26 (0.491) Cm (26:32-57:63)

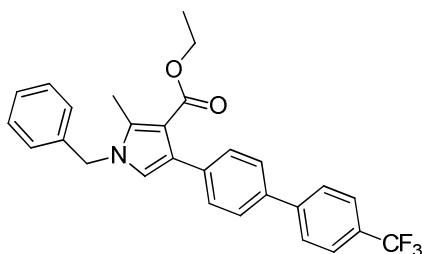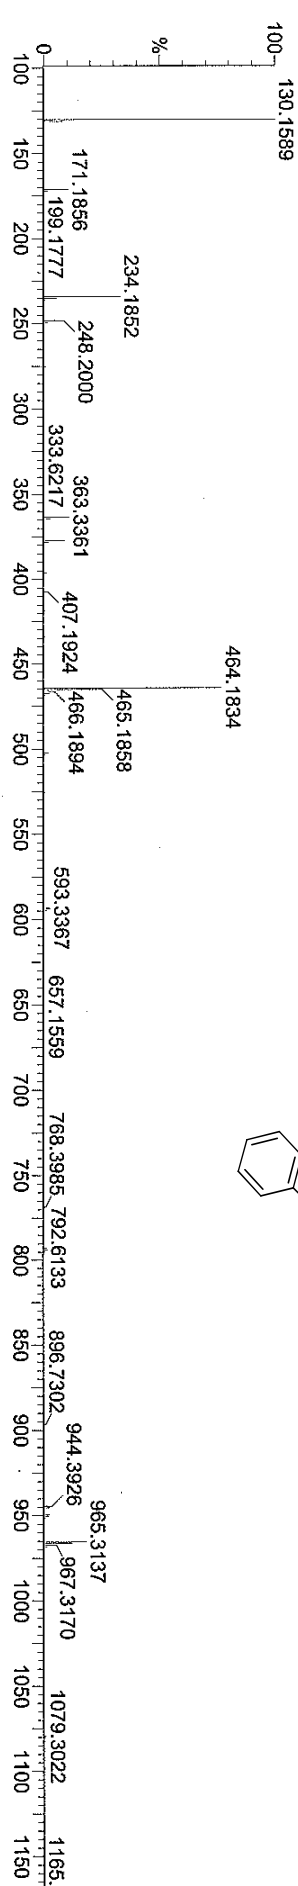

| Minimum: | -1.0        |      |      |      |       |         |   |    |    |
|----------|-------------|------|------|------|-------|---------|---|----|----|
| Maximum: | 5.0         | 5.0  | 80.0 |      |       |         |   |    |    |
| Mass     | Calcd. Mass | mDa  | PPM  | DBE  | i-FIT | Formula |   |    |    |
| 464.1834 | 464.1837    | -0.3 | -0.6 | 15.5 | 0.2   | C28 H25 | N | O2 | F3 |
|          | 464.1826    | 0.8  | 1.7  | 19.5 | 6.4   | C31 H24 | N | O  | F2 |
|          | 464.1815    | 1.9  | 4.1  | 23.5 | 28.0  | C34 H23 | N | F  |    |

A004-CPSY-3-004 in CDCl<sub>3</sub>  
NMR-400

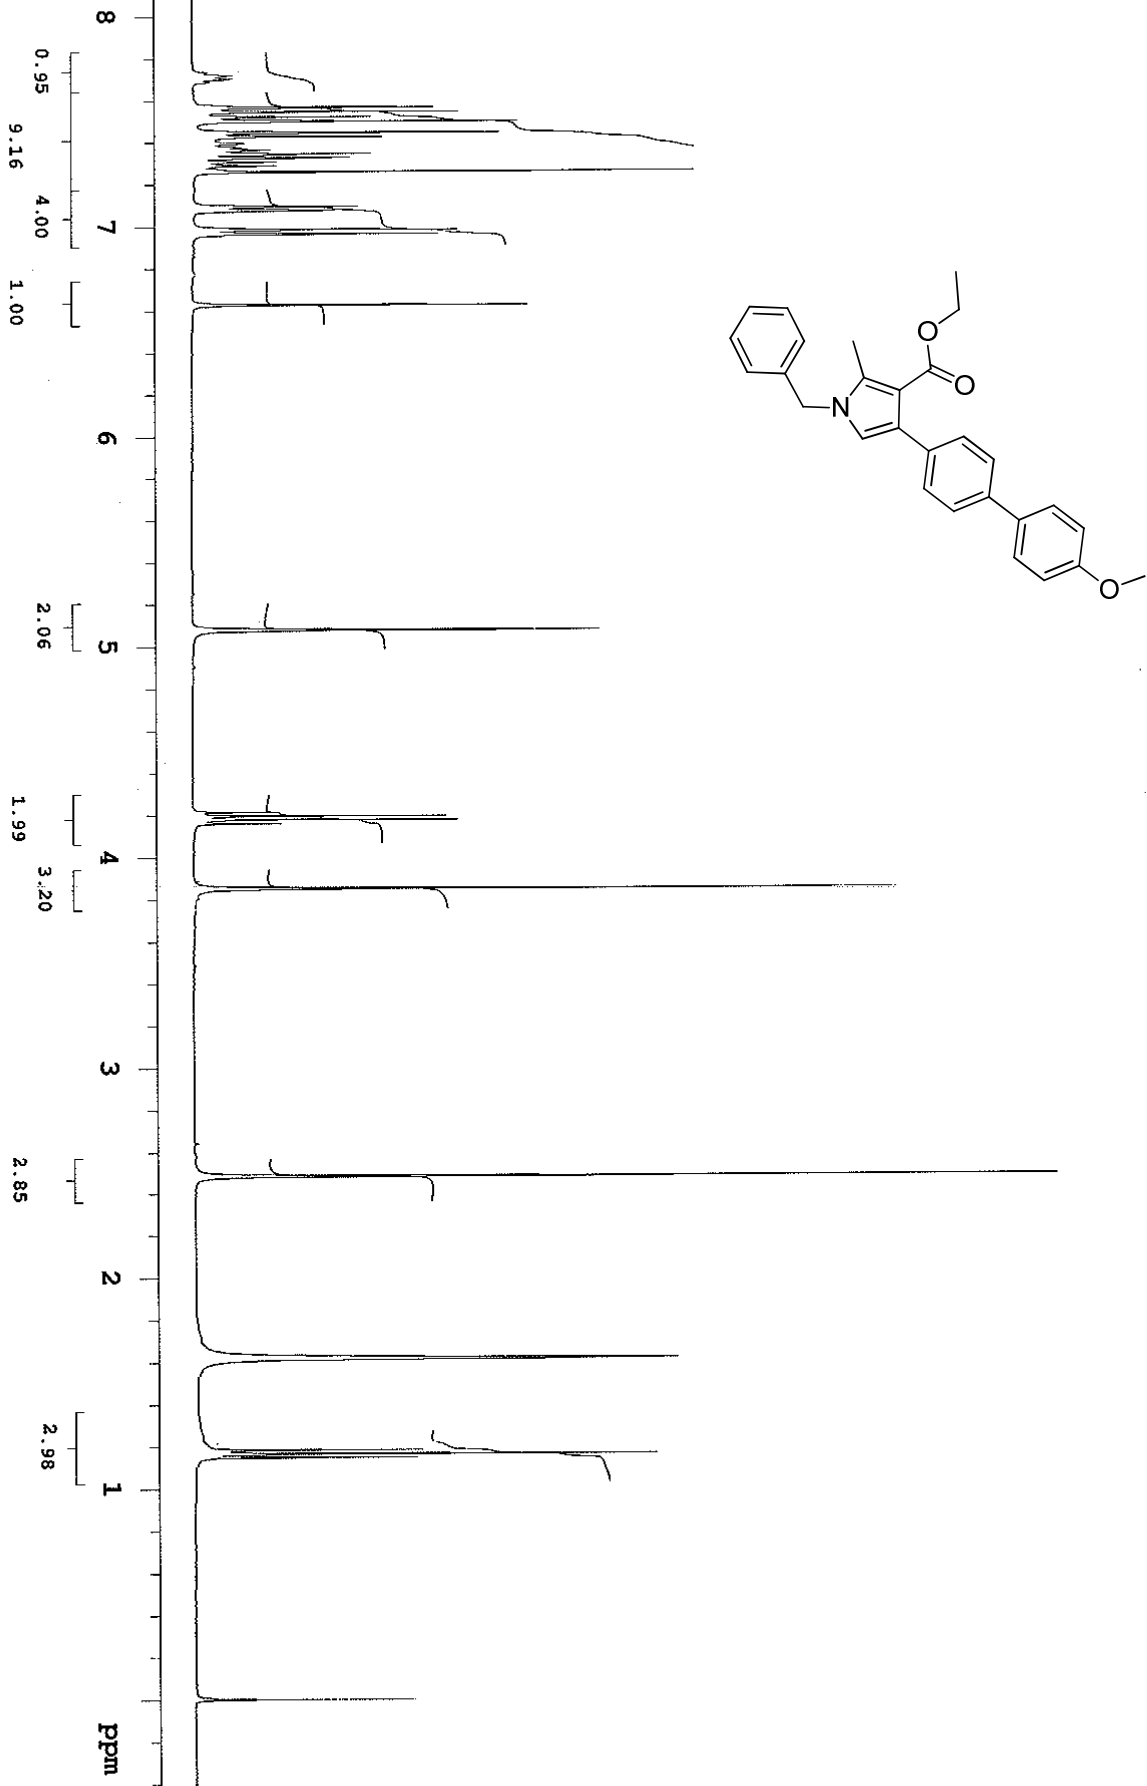

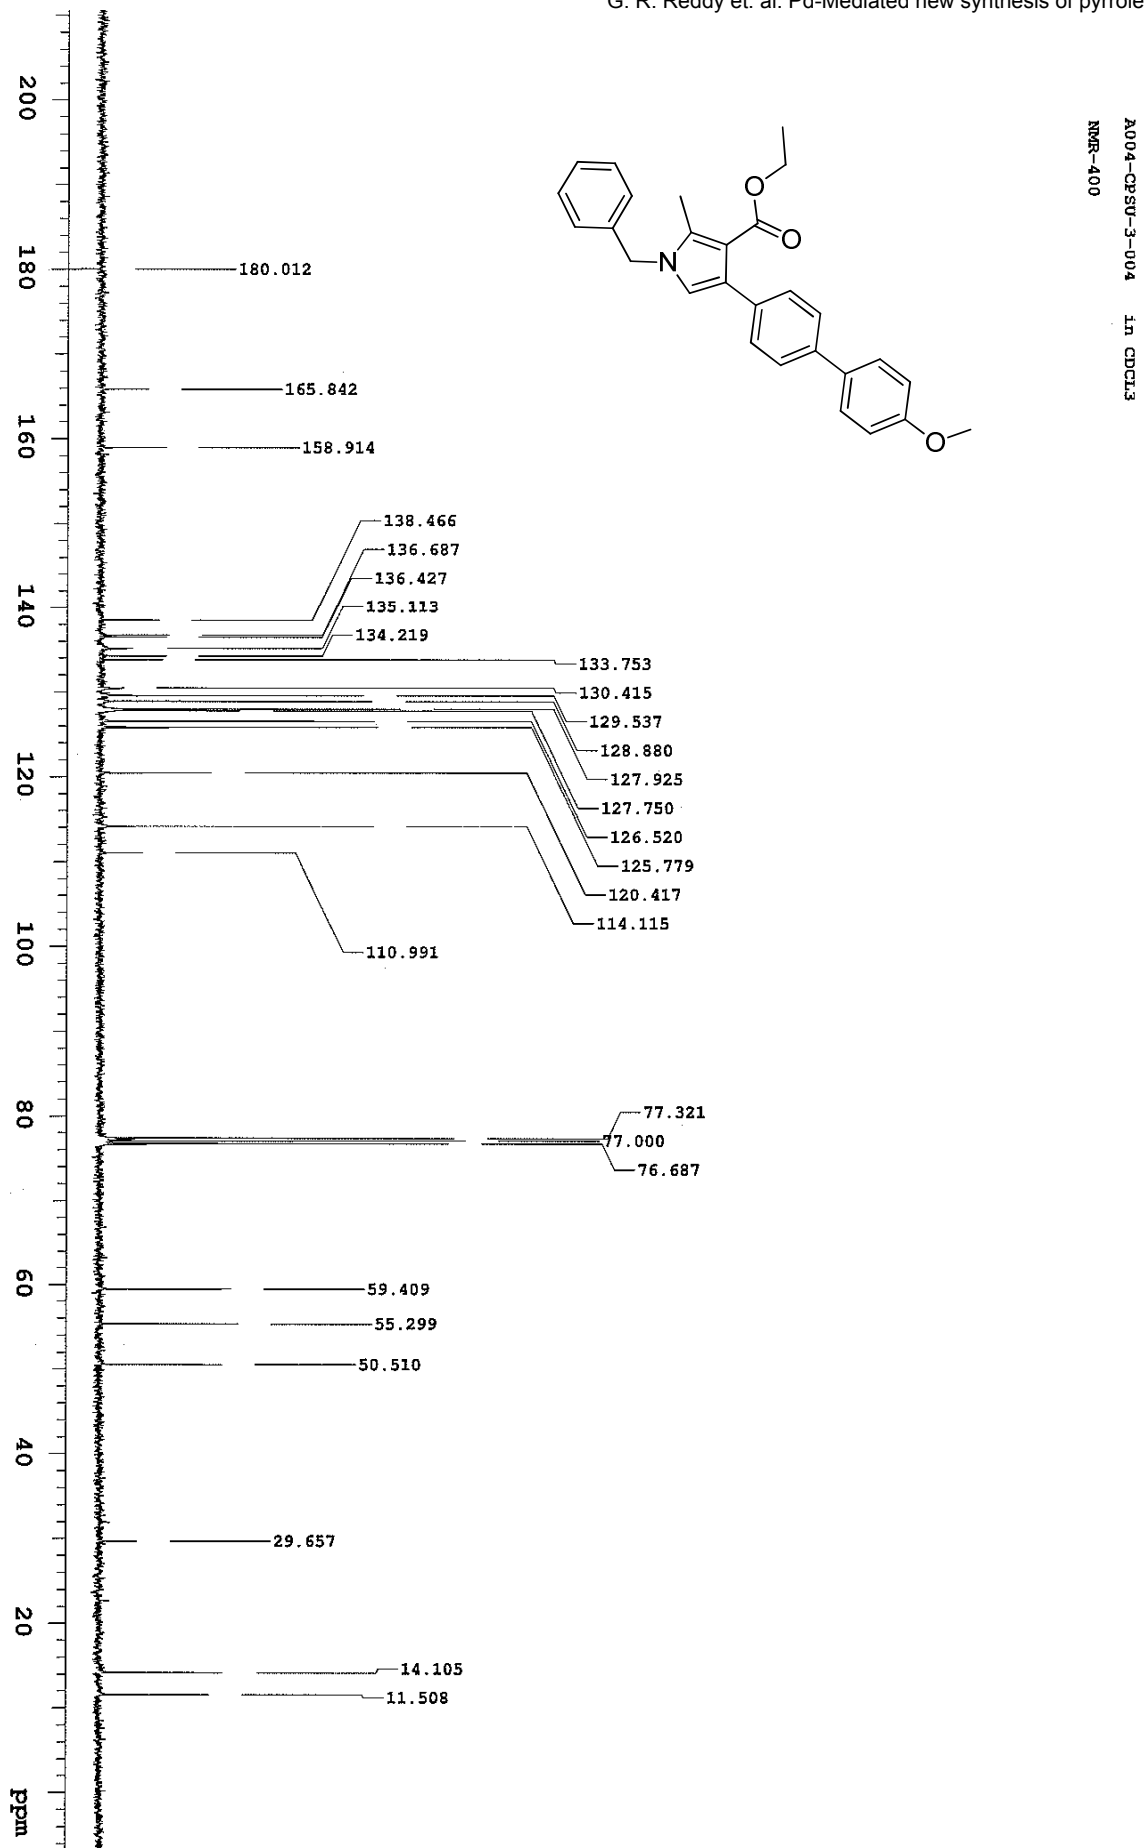

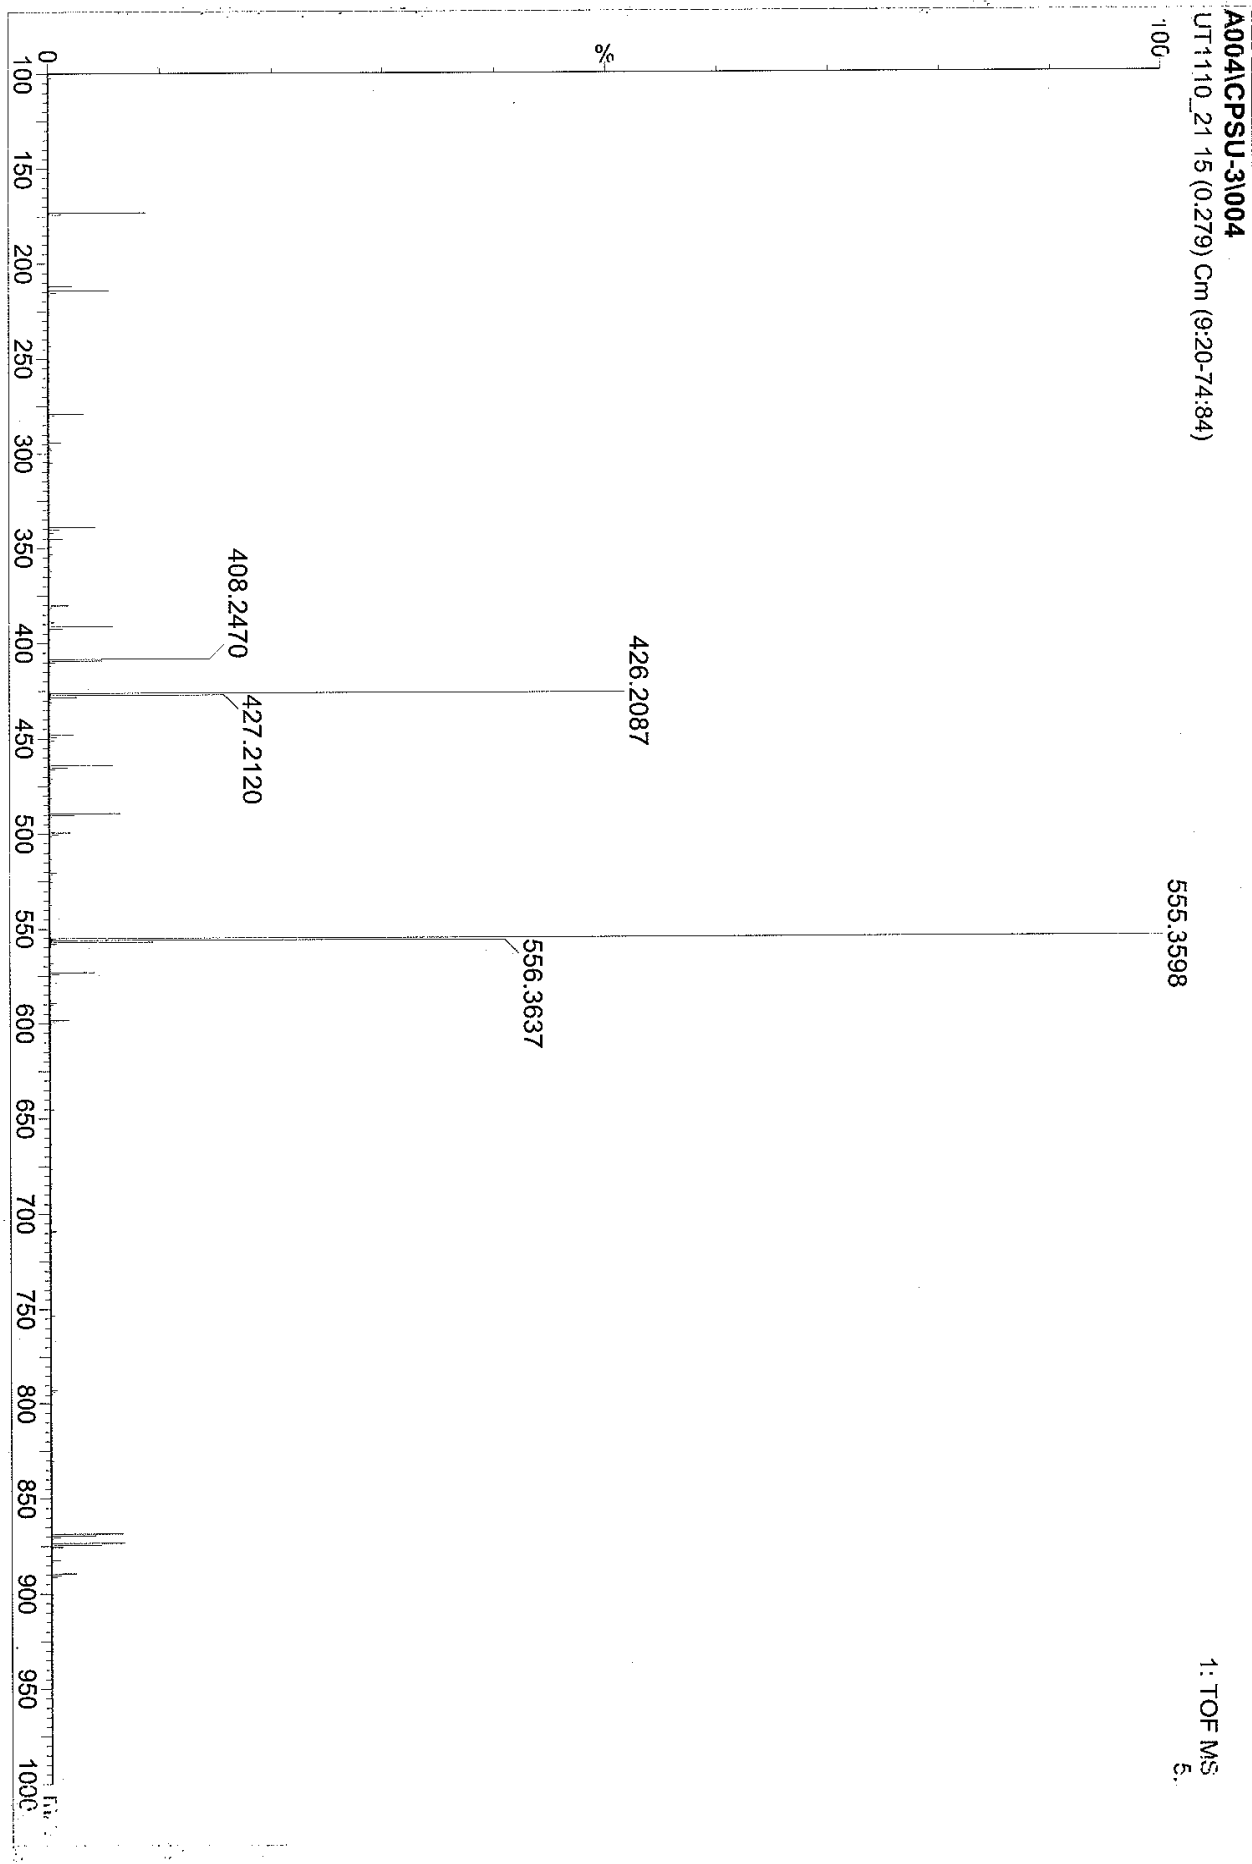

Elemental Composition Report

Single Mass Analysis

Tolerance = 5.0 PPM / DBE: min = -1.0, max = 80.0  
Element prediction: Off  
Number of isotope peaks used for i-FIT = 3

Monoisotopic Mass, Even Electron Ions  
138 formula(e) evaluated with 1 results within limits (up to 4 best isotopic matches for each mass)  
Elements Used:  
C: 0-35 H: 0-45 N: 0-5 O: 0-5  
X004(CPSU-3)004  
UT1110\_21 15 (0.279) Cm (9:20-74:84)

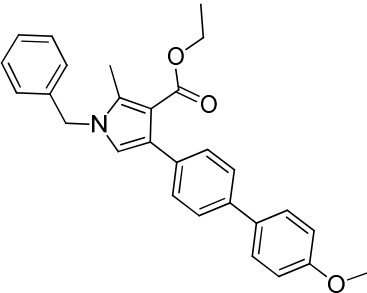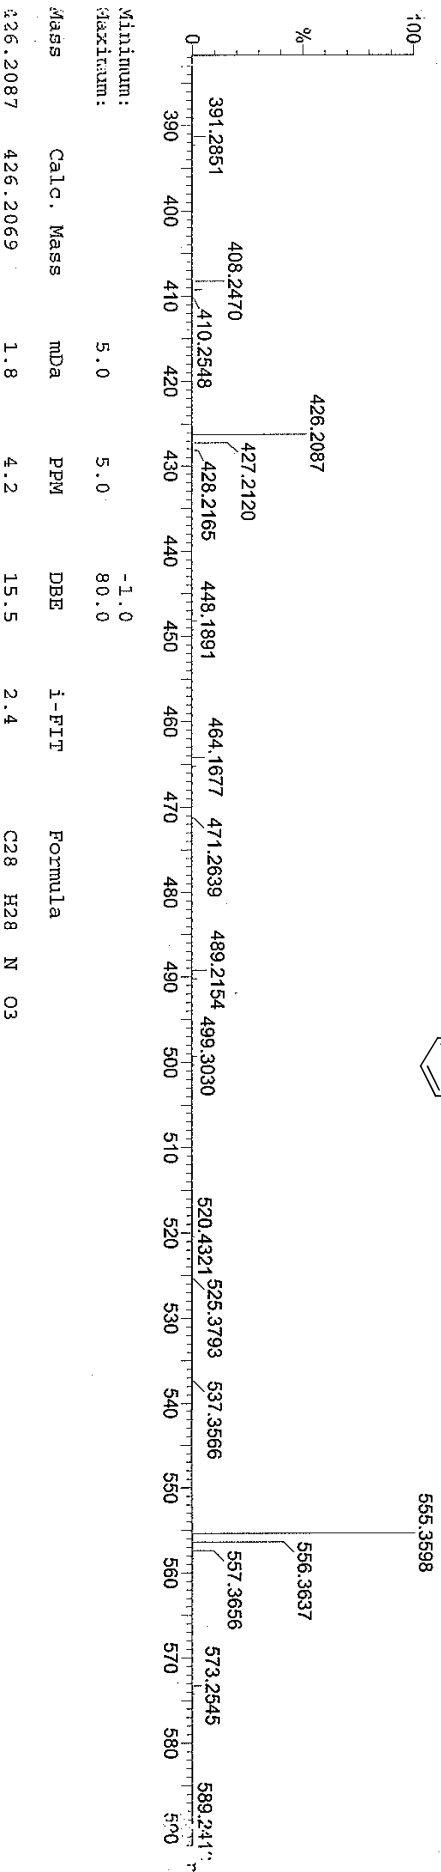

|          |            |     |     |      |       |
|----------|------------|-----|-----|------|-------|
| Minimum: |            |     |     |      |       |
| Maximum: |            |     |     |      |       |
| Mass     | Calc. Mass | mDa | PPM | DBE  | i-FIT |
| 426.2087 | 426.2069   | 1.8 | 4.2 | 15.5 | 2.4   |

AU04-CR50-4-005 in CDCl3  
NMR-400

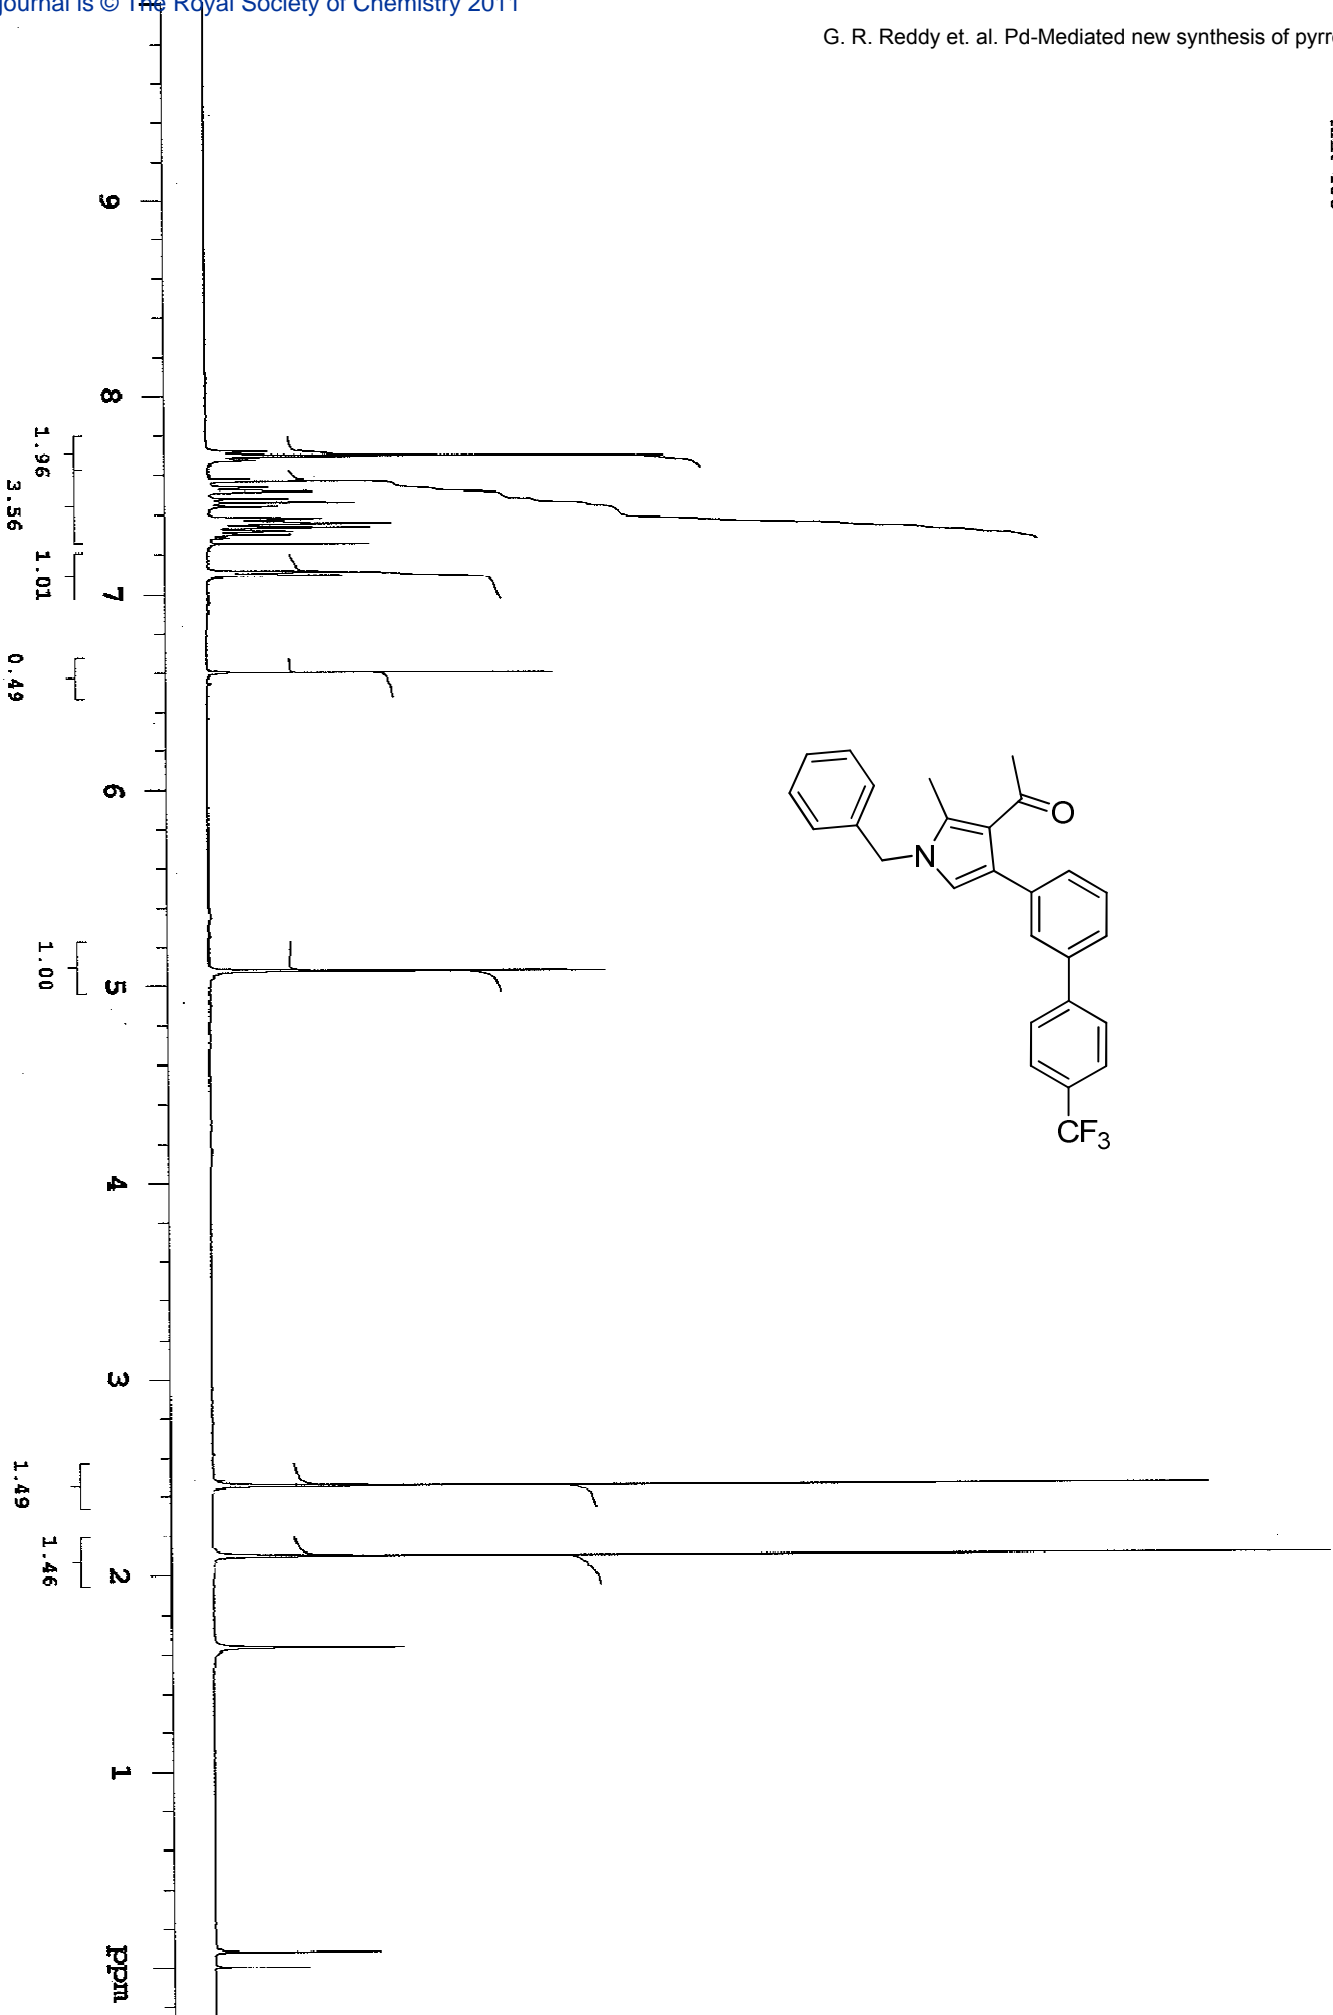

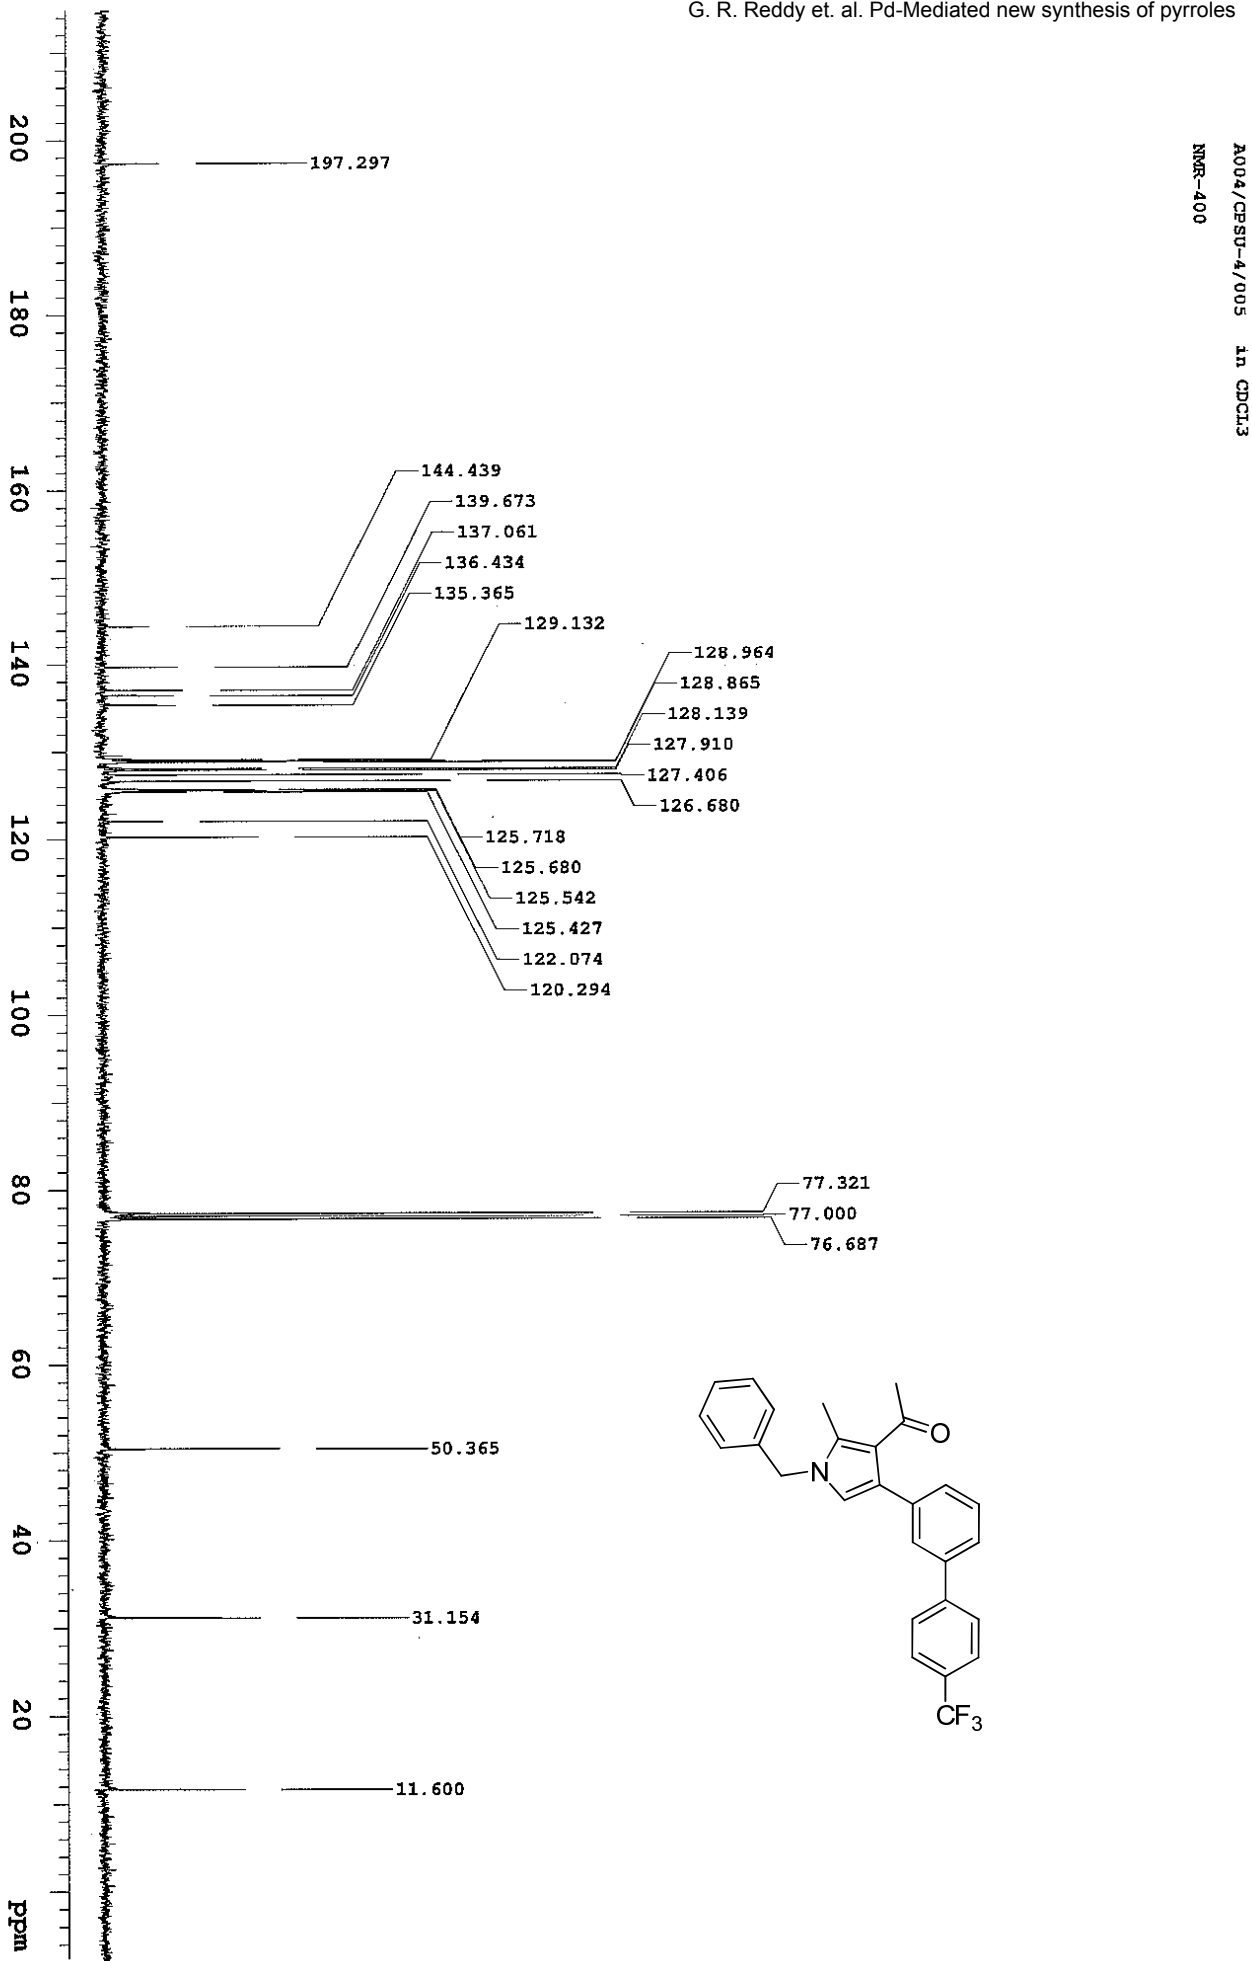

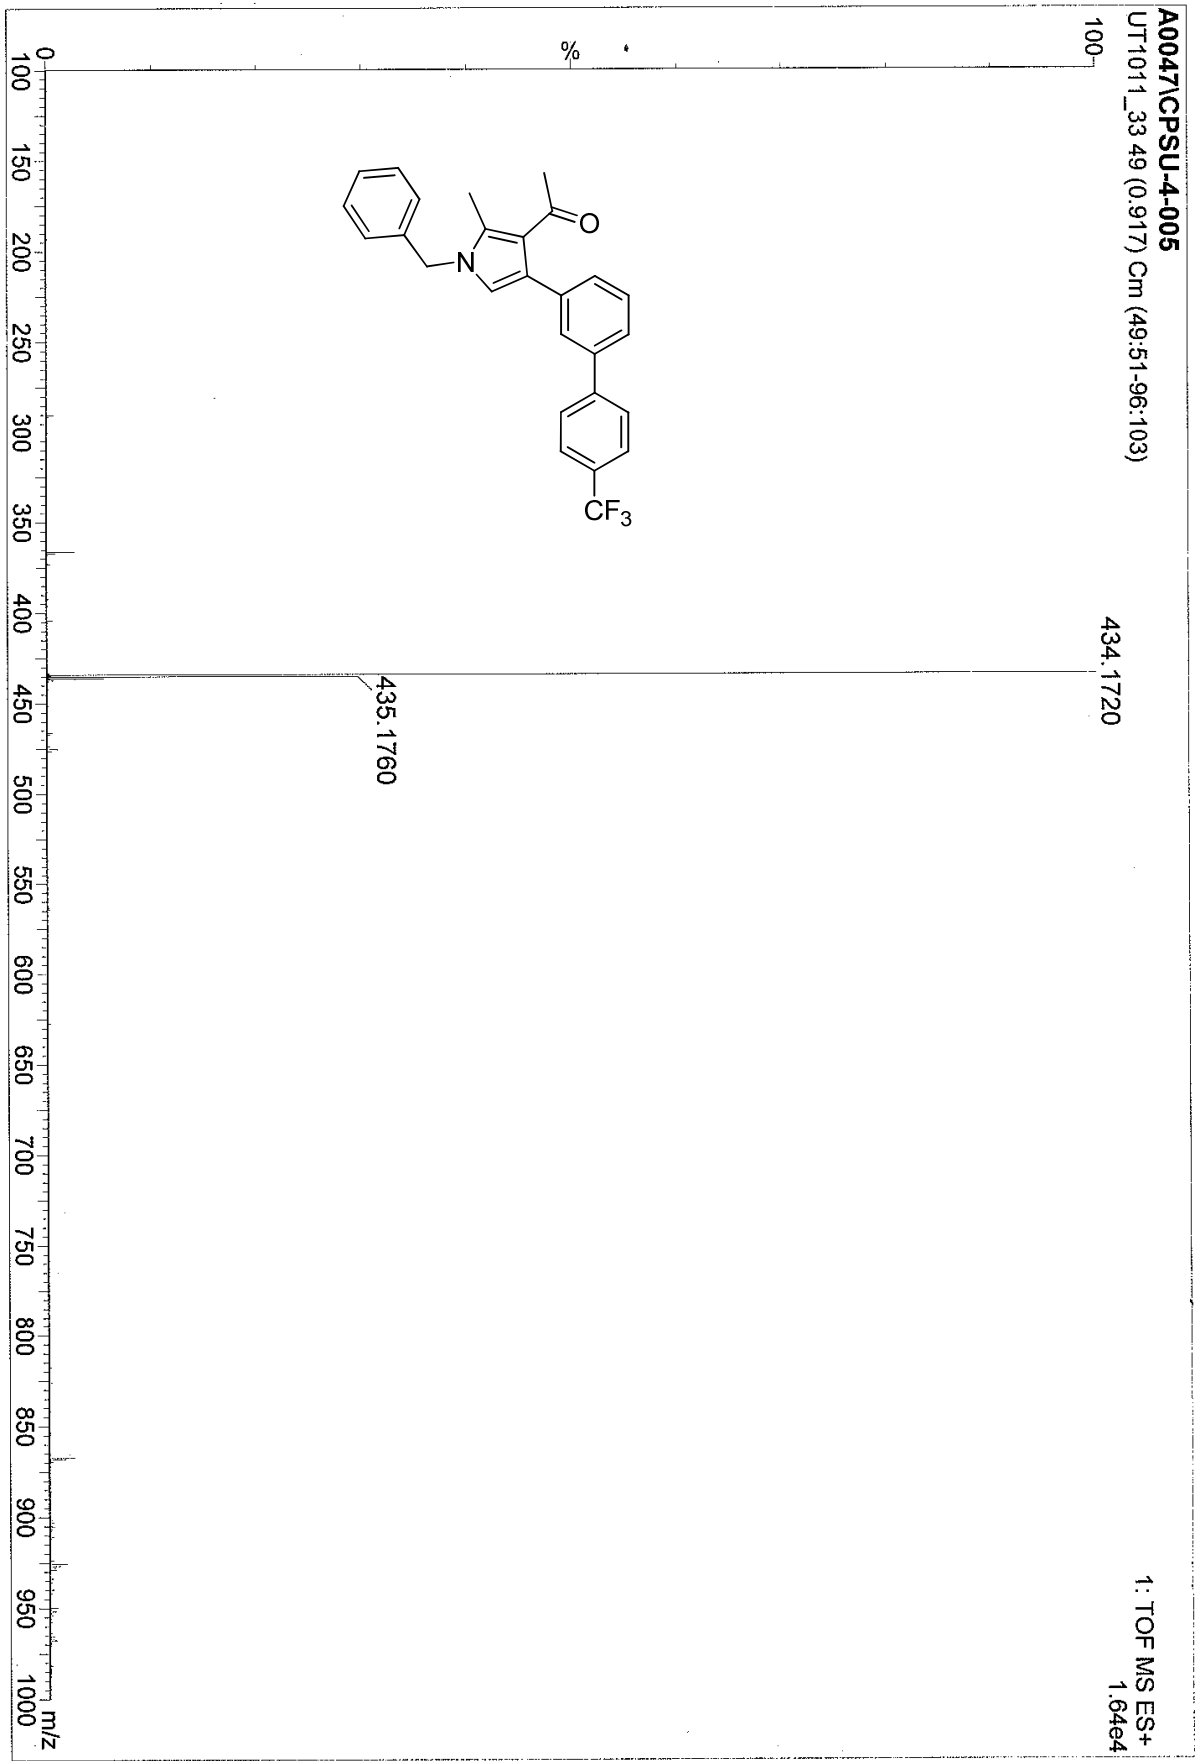



# Elemental Composition Report

## Single Mass Analysis

Tolerance = 5.0 PPM / DBE: min = -1.0, max = 80.0

Element prediction: Off

Number of isotope peaks used for i-FIT = 2

Monoisotopic Mass, Even Electron Ions

9.11 formula(e) evaluated with 1 results within limits (up to 4 best isotopic matches for each mass)

Elements Used:

C: 0-30 H: 0-30 N: 0-5 O: 0-6 F: 3-3

A0047(CPSU-4-005

UT1011\_33.49 (0.917) Cm (49.51-96.103)

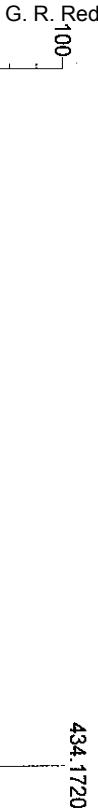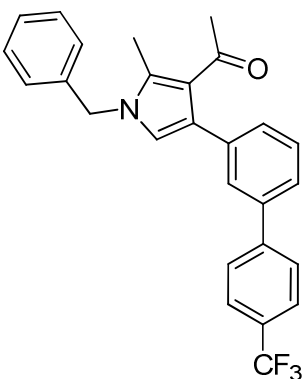

1: TOF MS ES+  
1.64e+004

| Mass     | Calc. Mass | mDa  | PPM  | DBE  | i-FIT | Formula        |
|----------|------------|------|------|------|-------|----------------|
| 434.1720 | 434.1732   | -1.2 | -2.8 | 15.5 | 3.3   | C27 H23 N O F3 |

Minimum: 5.0  
Maximum: 5.0  
-1.0  
80.0

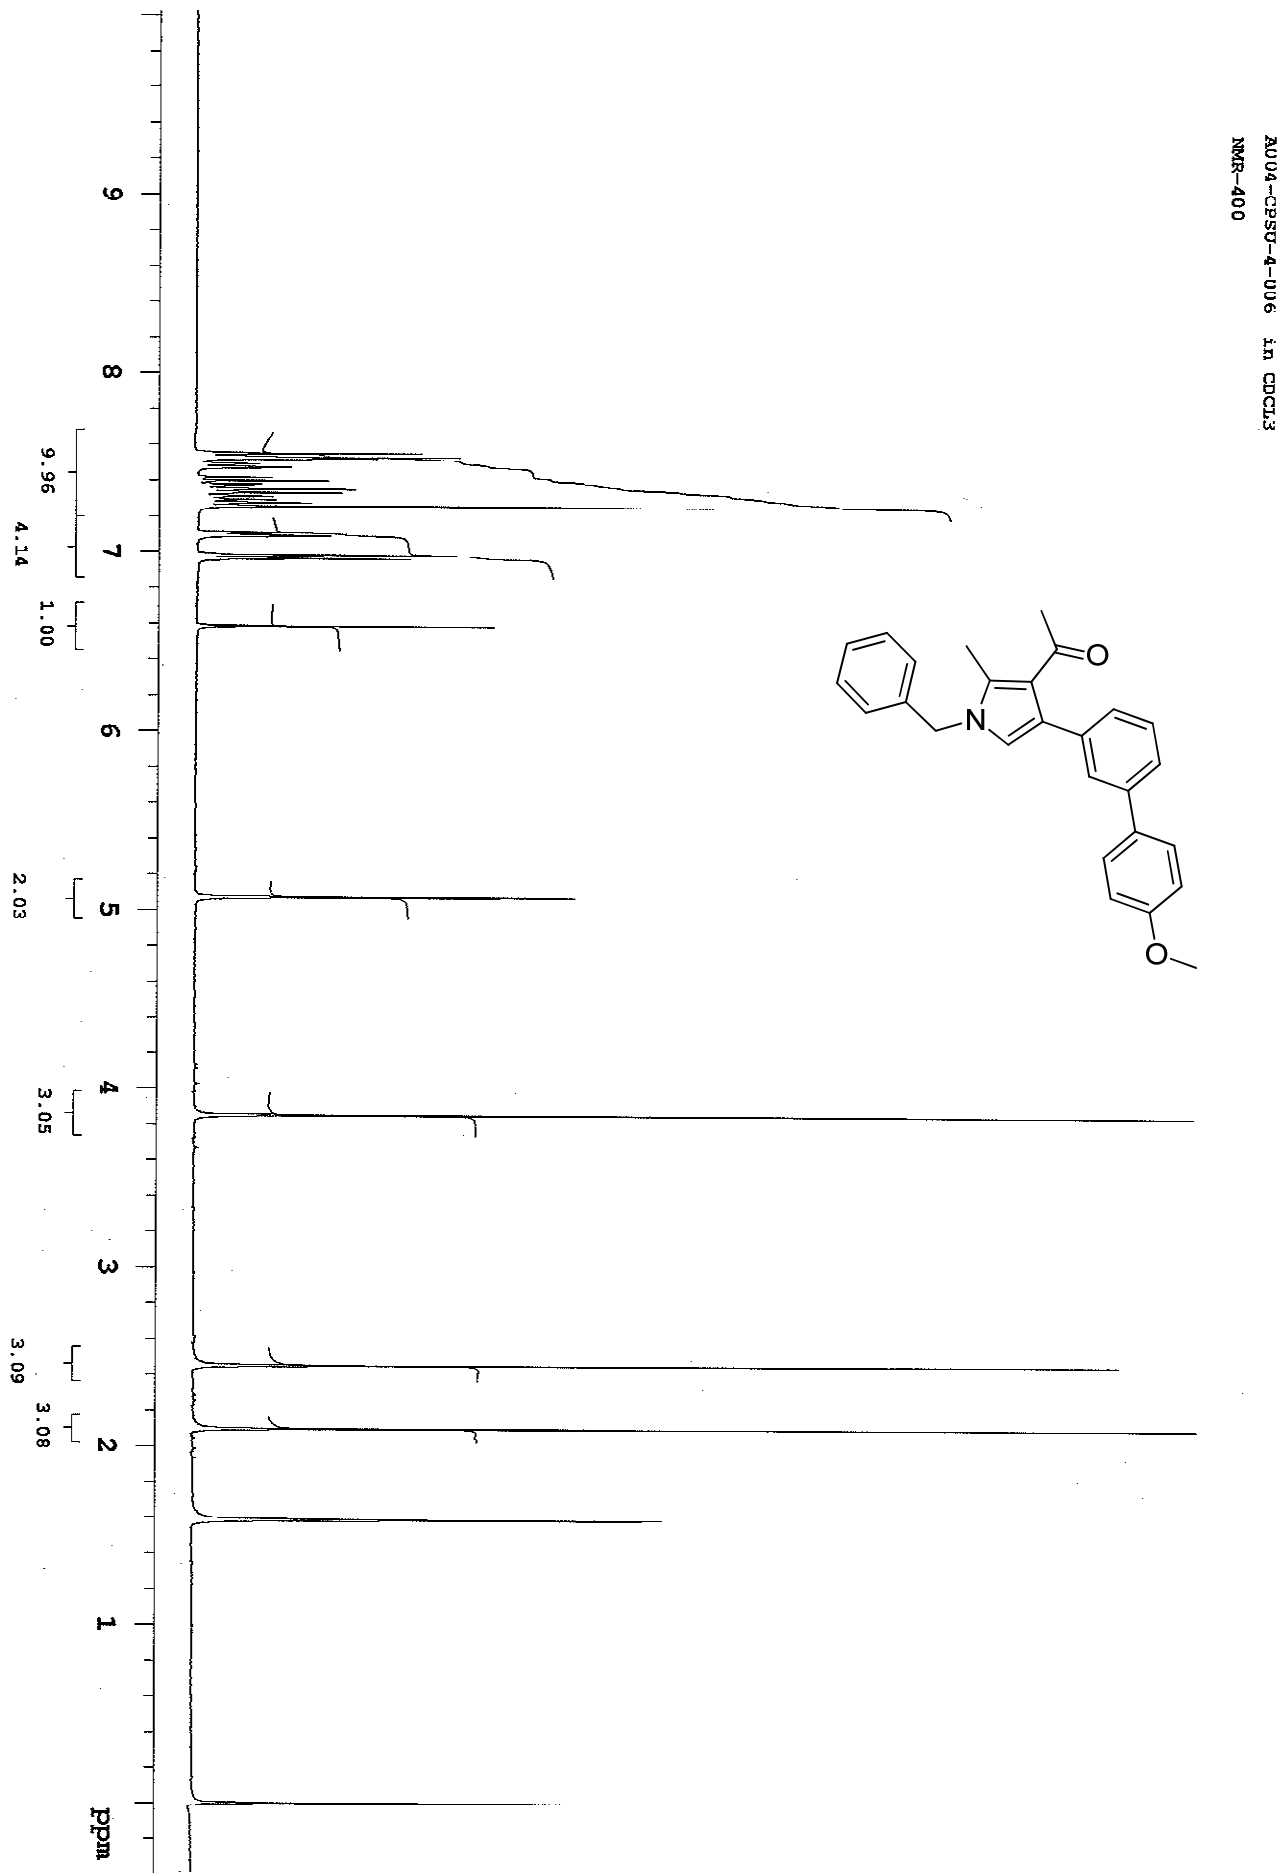

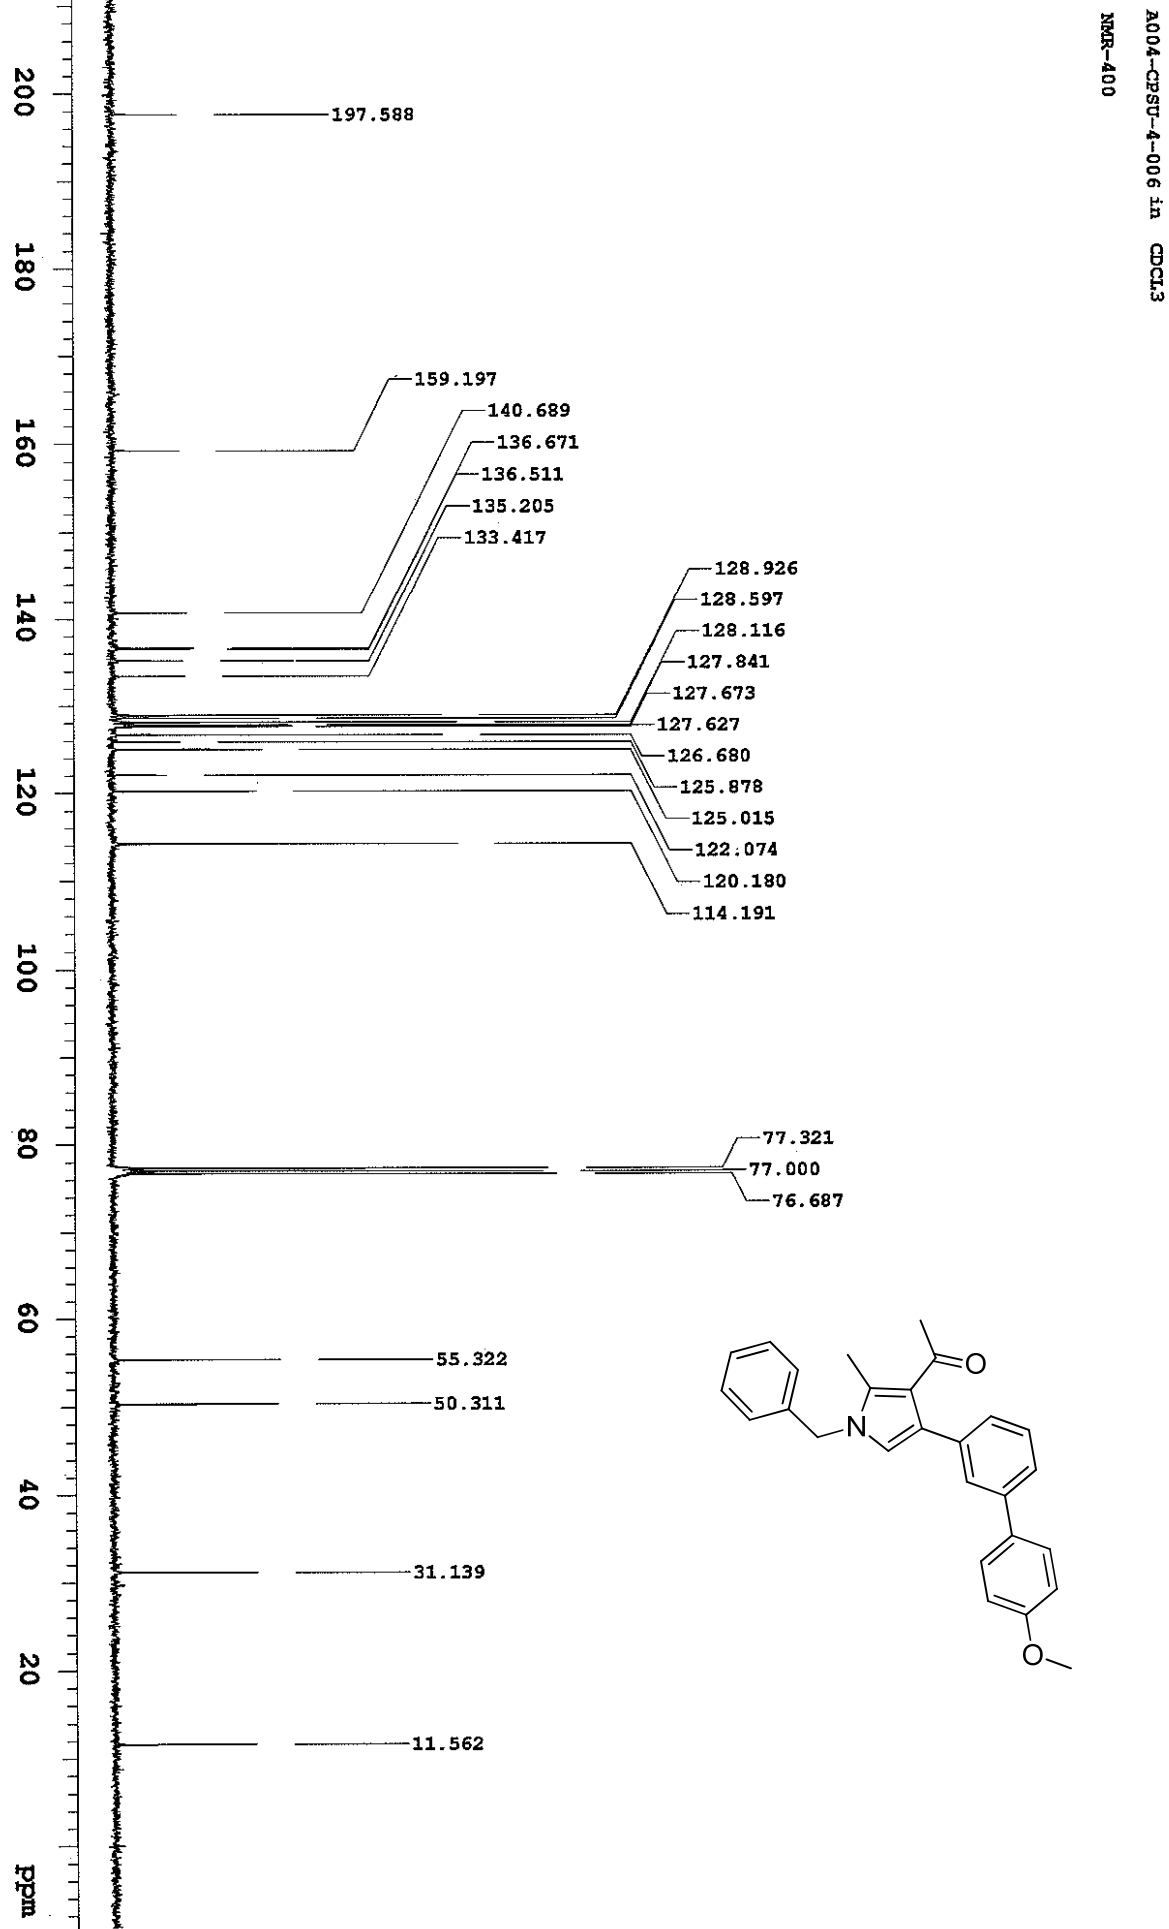

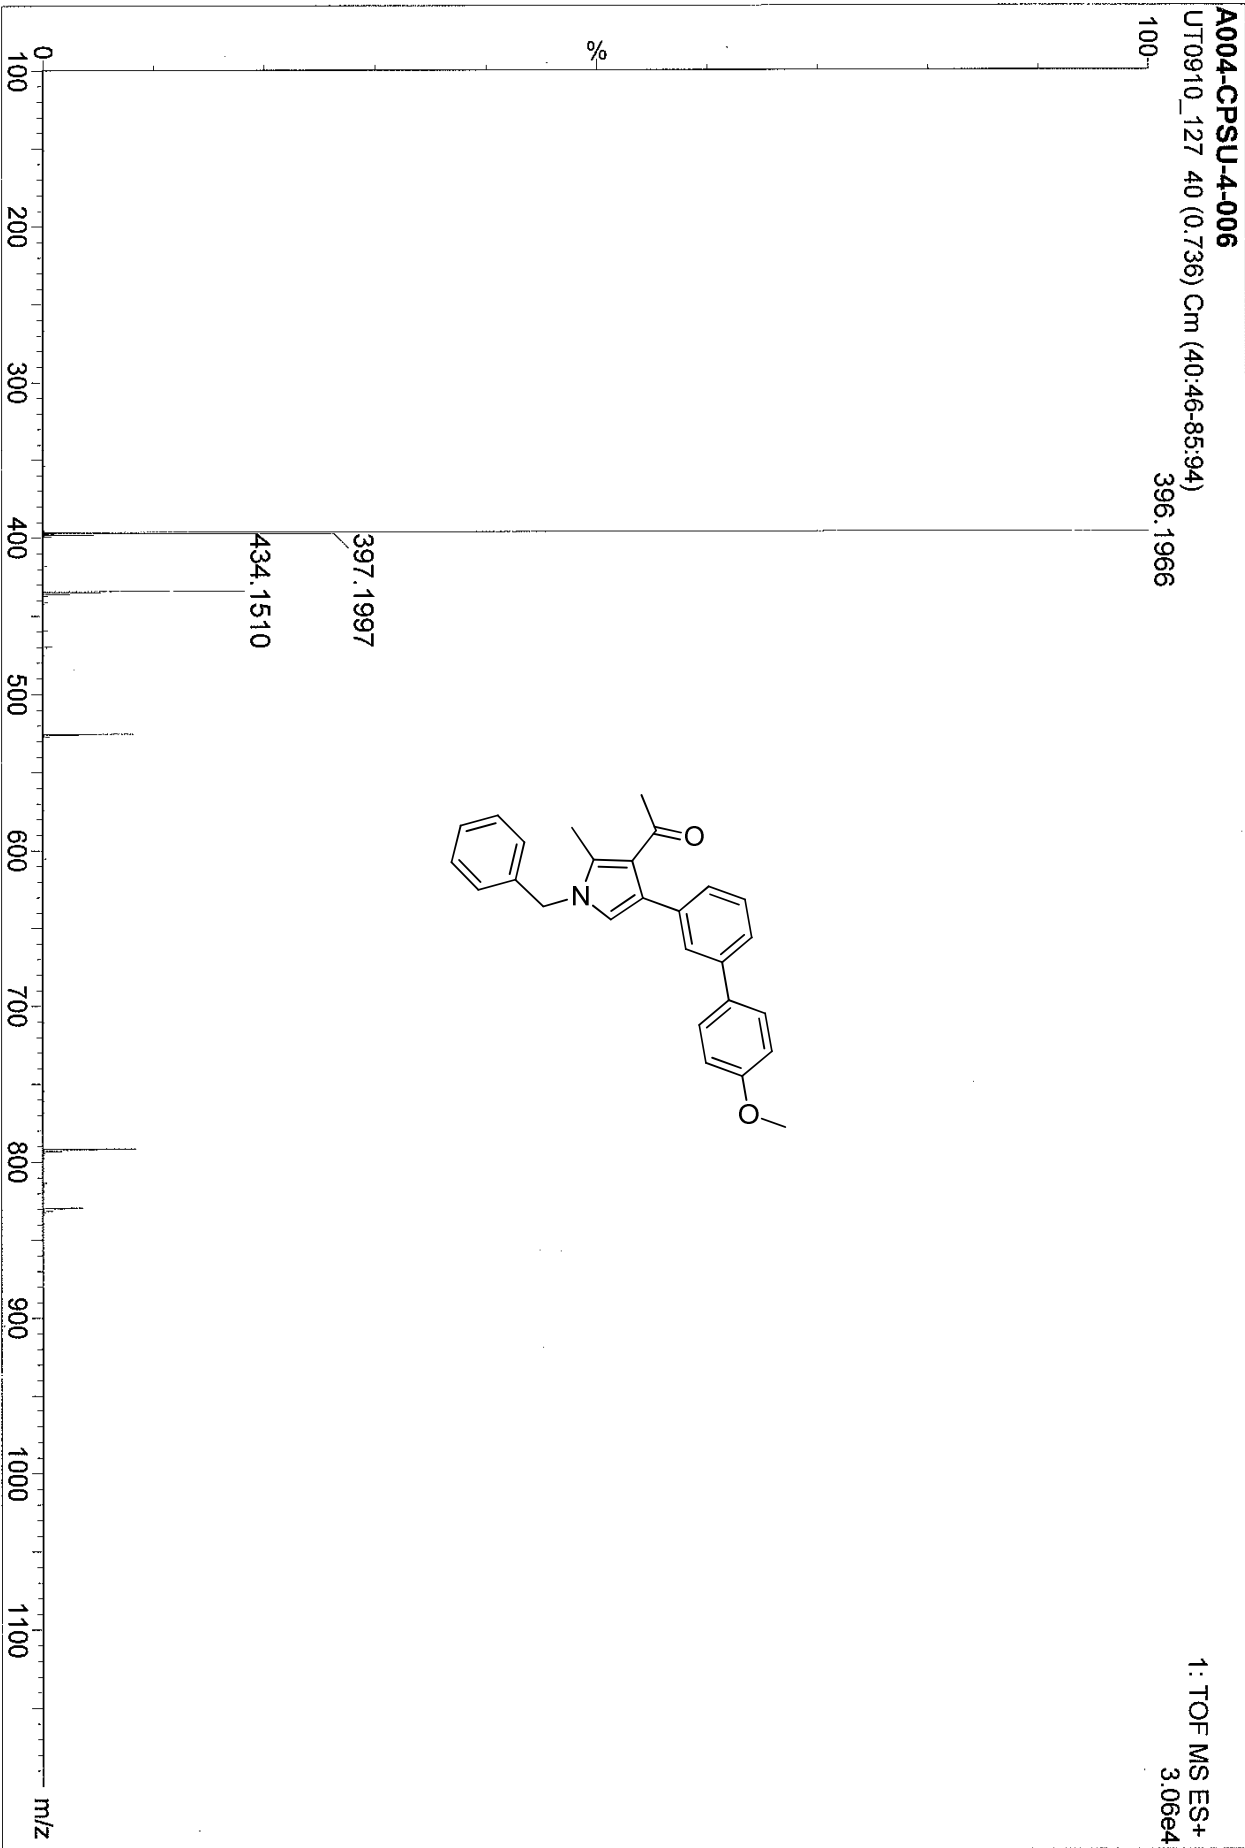

## Elemental Composition Report

### Single Mass Analysis

Tolerance = 10.0 PPM / DBE: min = -1.0, max = 80.0

Element prediction: Off

Number of isotope peaks used for i-FIT = 2

Monoisotopic Mass, Even Electron Ions

286 formula(e) evaluated with 1 results within limits (up to 4 closest results for each mass)

Elements Used:

C: 0-40 H: 0-60 N: 0-6 O: 0-8

A004-CPSU4-006

UT0910\_127 40 (0.736) Cm (40.46-85.94)

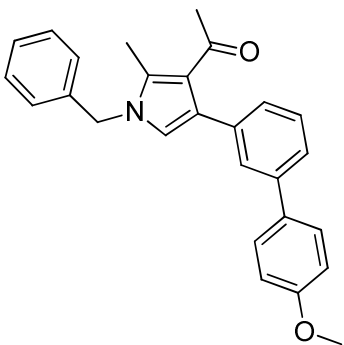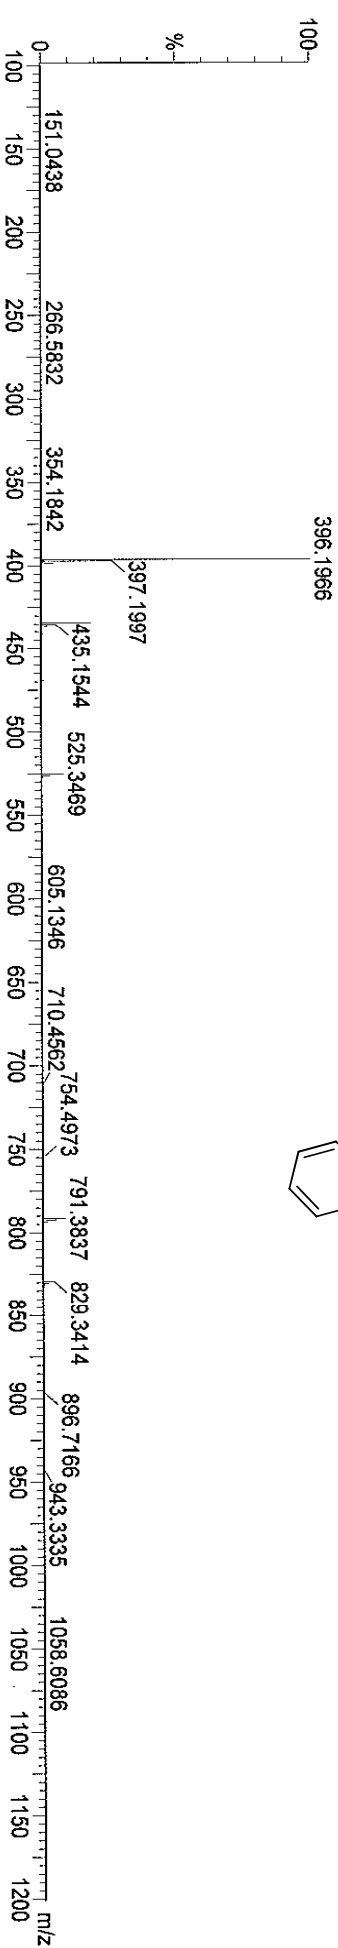

1: TOF MS ES+  
3.06e+004

|          |            |     |      |      |       |              |
|----------|------------|-----|------|------|-------|--------------|
| Minimum: |            | 5.0 | 10.0 | -1.0 |       |              |
| Maximum: |            |     |      | 80.0 |       |              |
| Mass     | Calc. Mass | mDa | PPM  | DBE  | i-FIT | Formula      |
| 396.1966 | 396.1964   | 0.2 | 0.5  | 15.5 | 91.8  | C27 H26 N O2 |

AU04-CPST04-008 1D CDCl<sub>3</sub>  
NMR-400

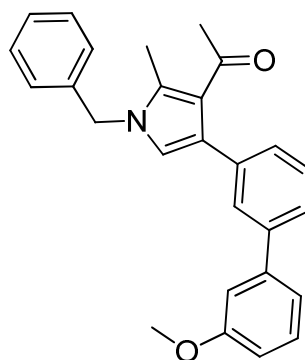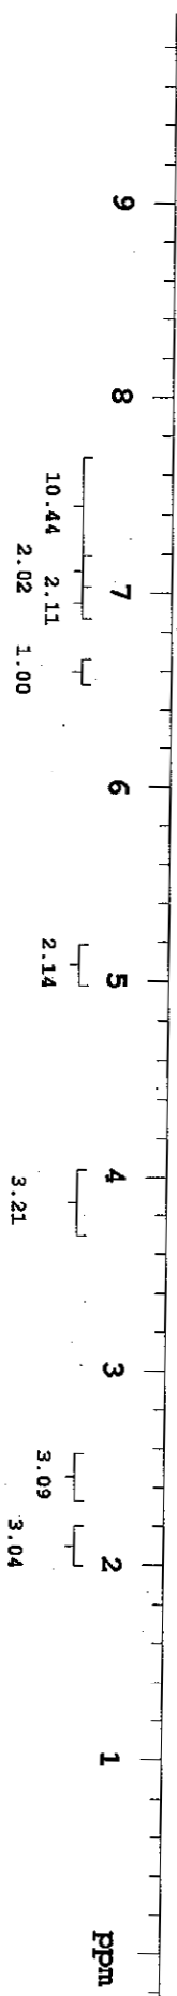

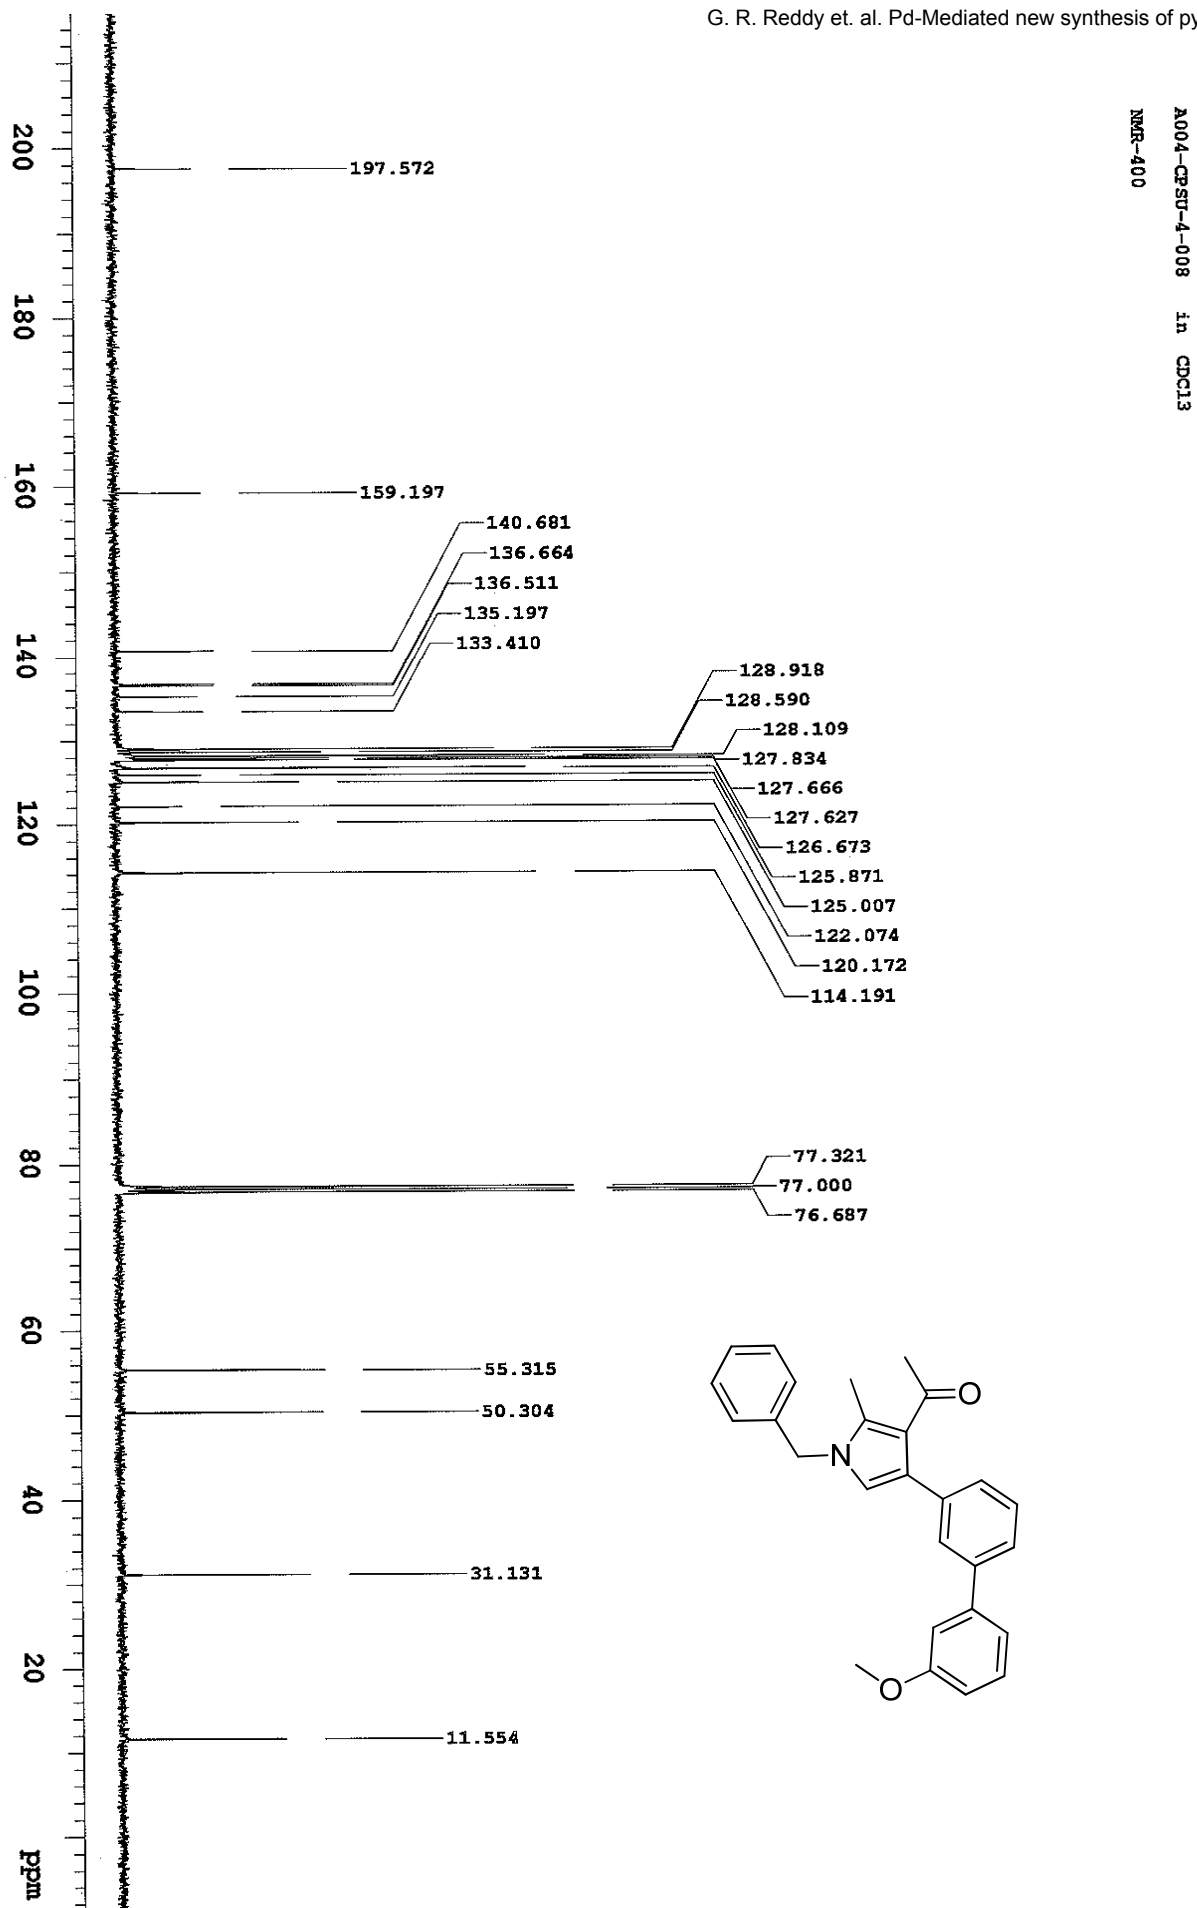

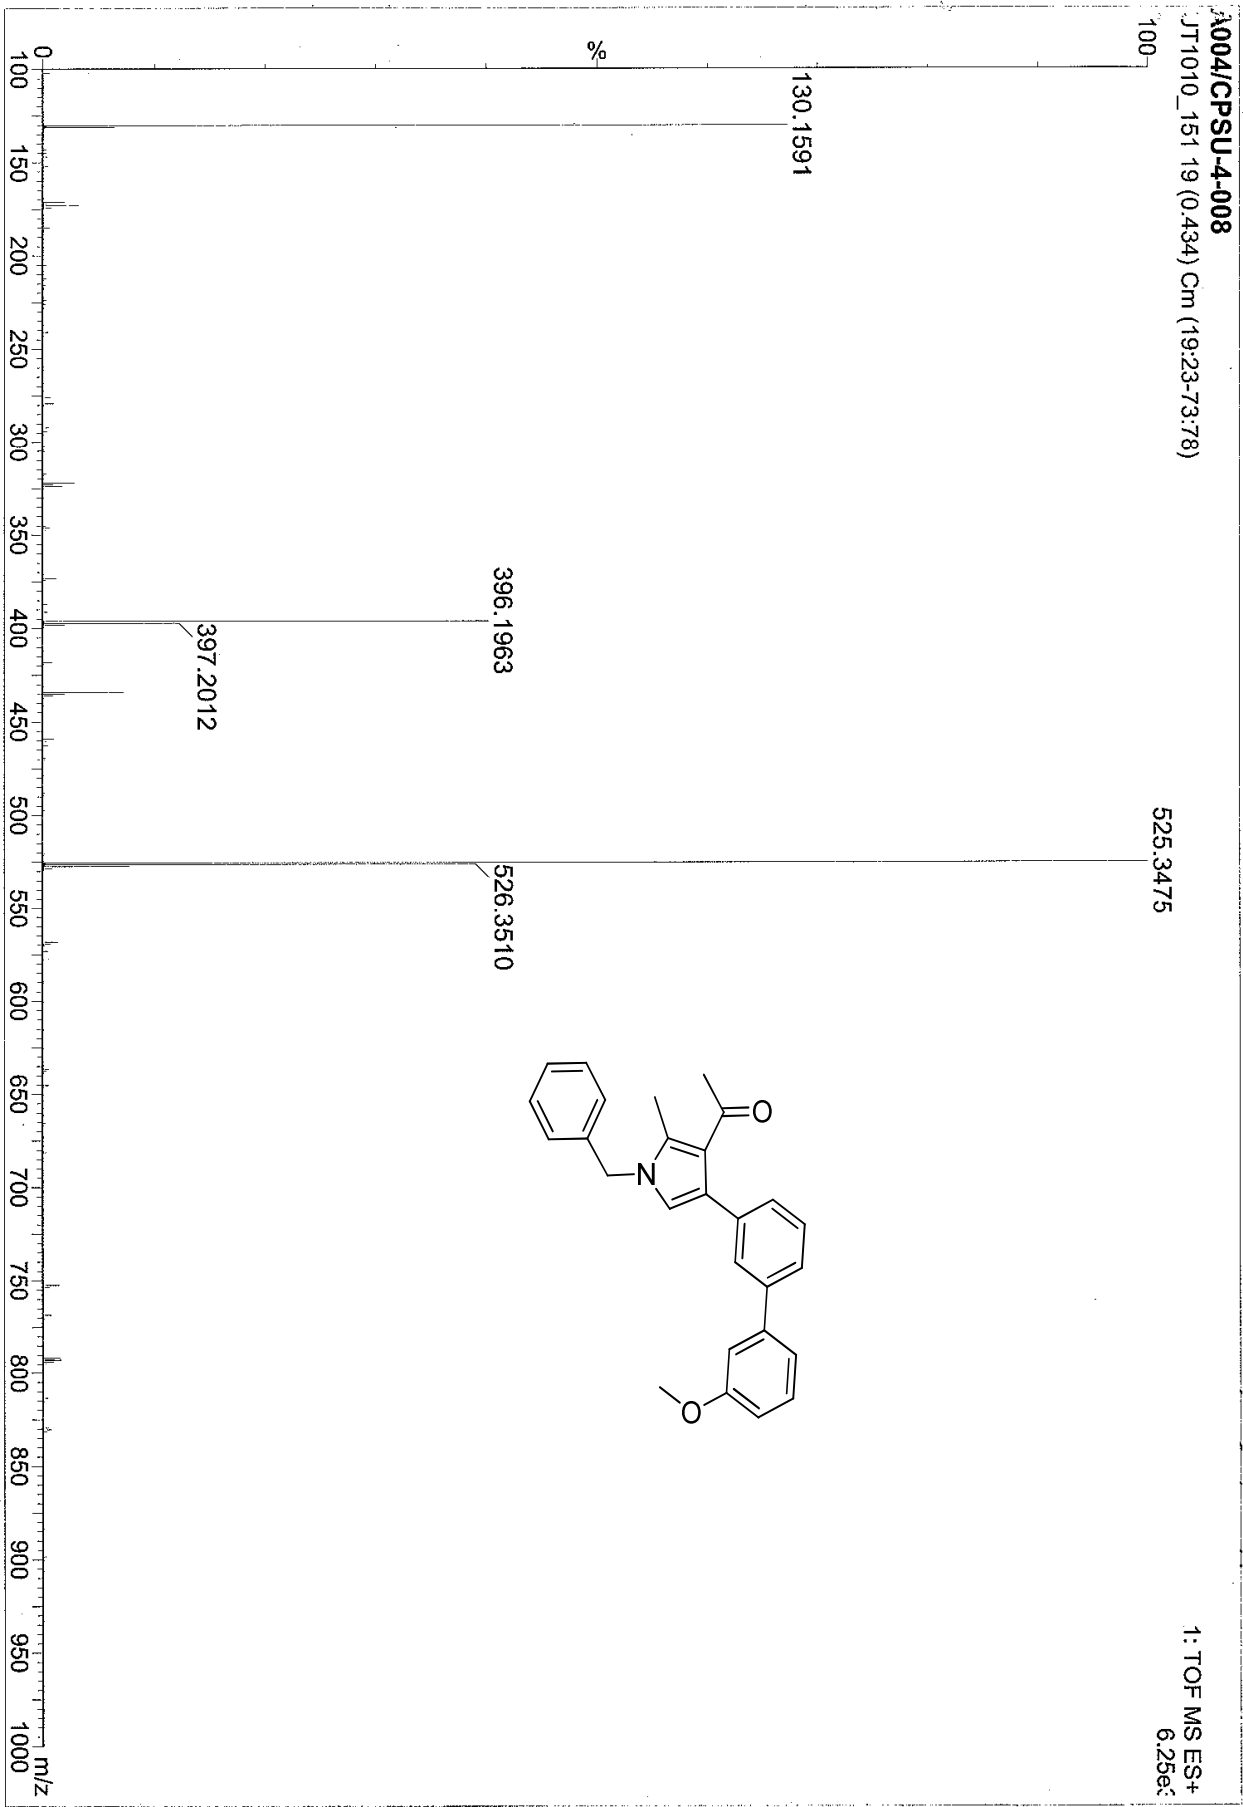



Element prediction: Off

<sup>8</sup> Monoisotopic Mass, Even Electron Ions

**Elements Used:**

C: 0-45 H: 0-70 N: 0-6 O: 0-6

Σ<sub>e</sub>  
PAU04/CPSU-4-008

$\overline{P}u_2^{1010}_{-151\ 19}$  (0.434) Cm (19:23-73:78)

525,3475

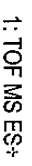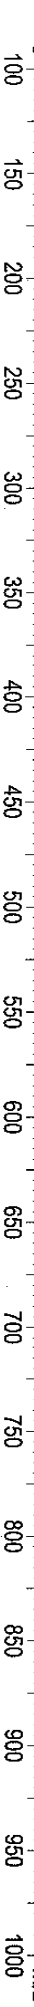

|          |      |
|----------|------|
| Minimum: | -1.0 |
| Maximum: | 80.0 |
| 5.0      | 5.0  |

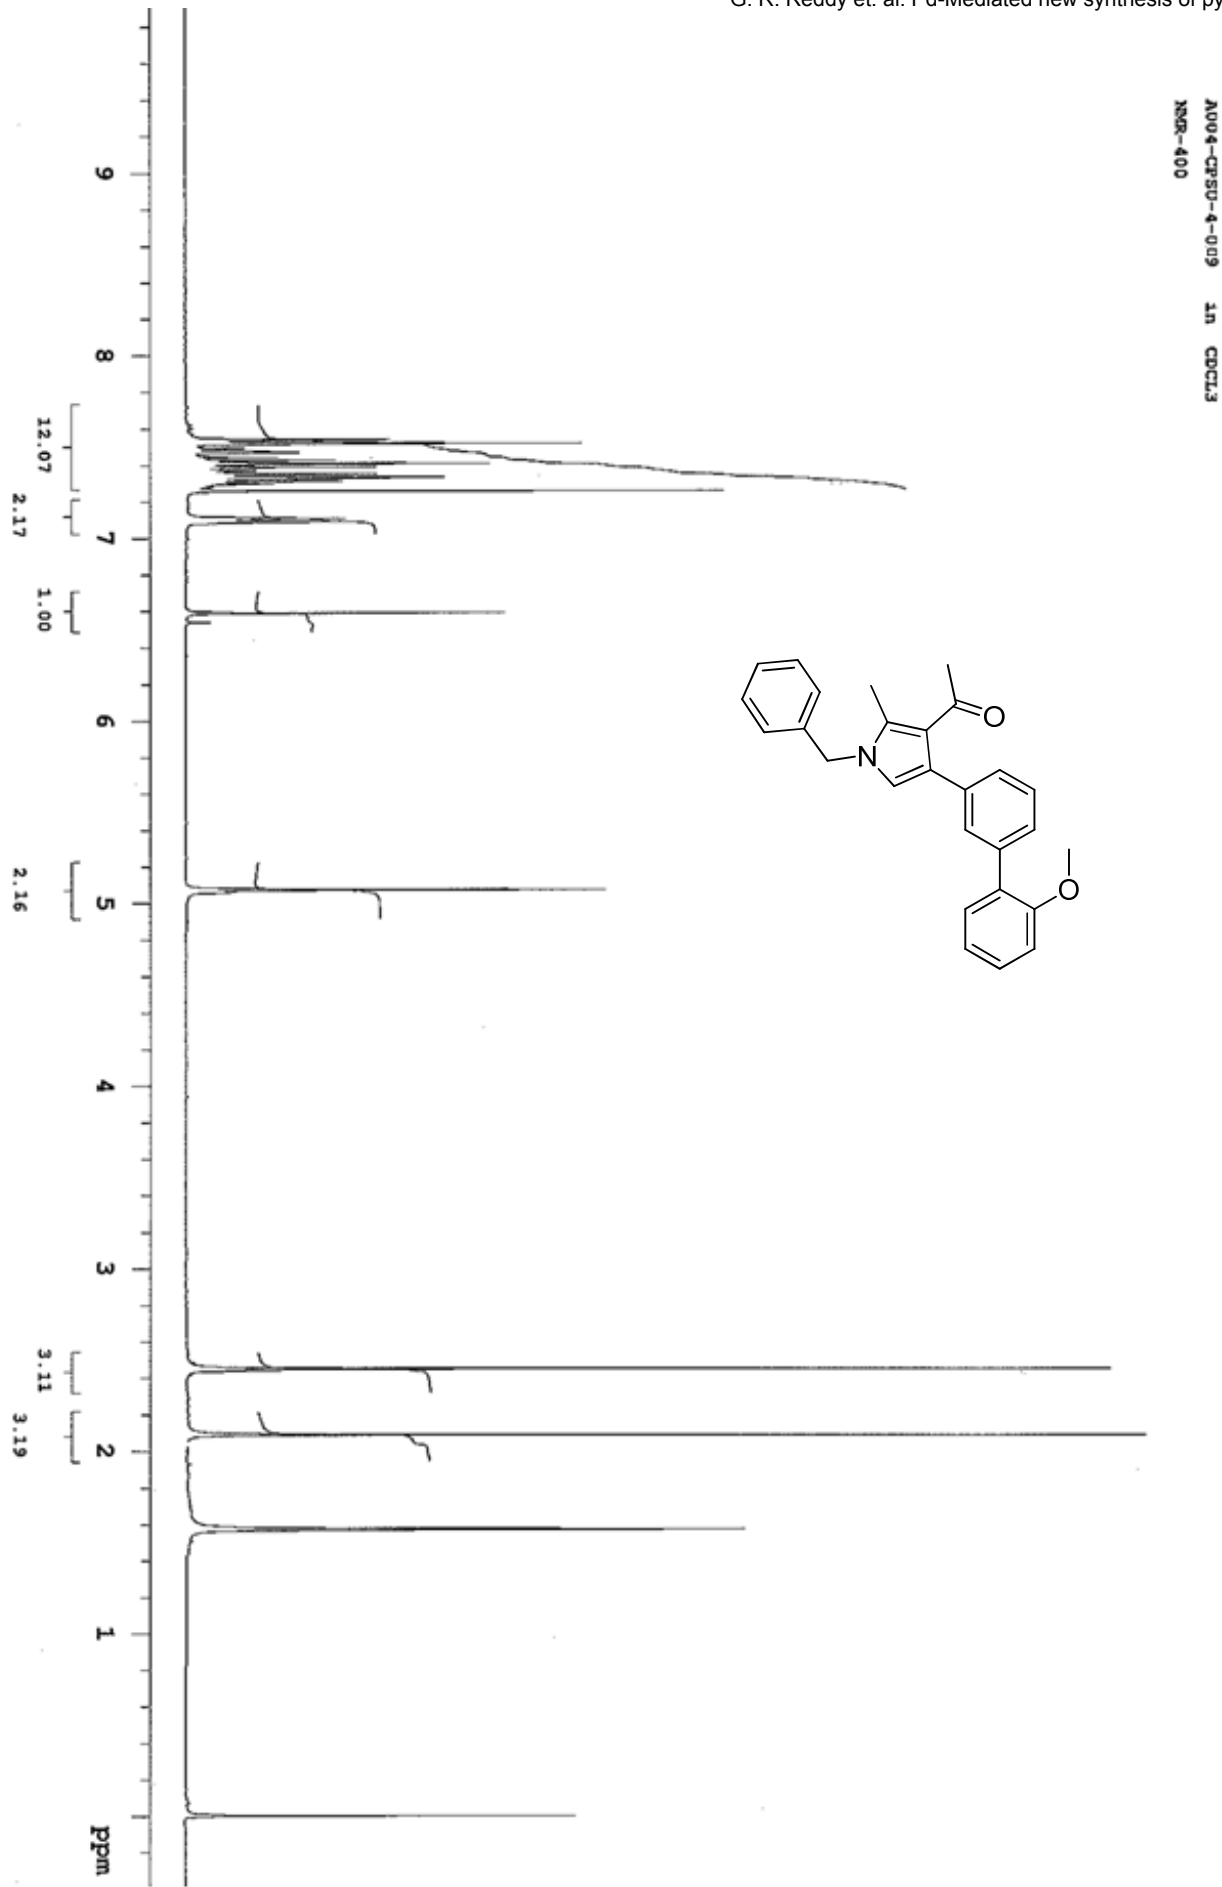

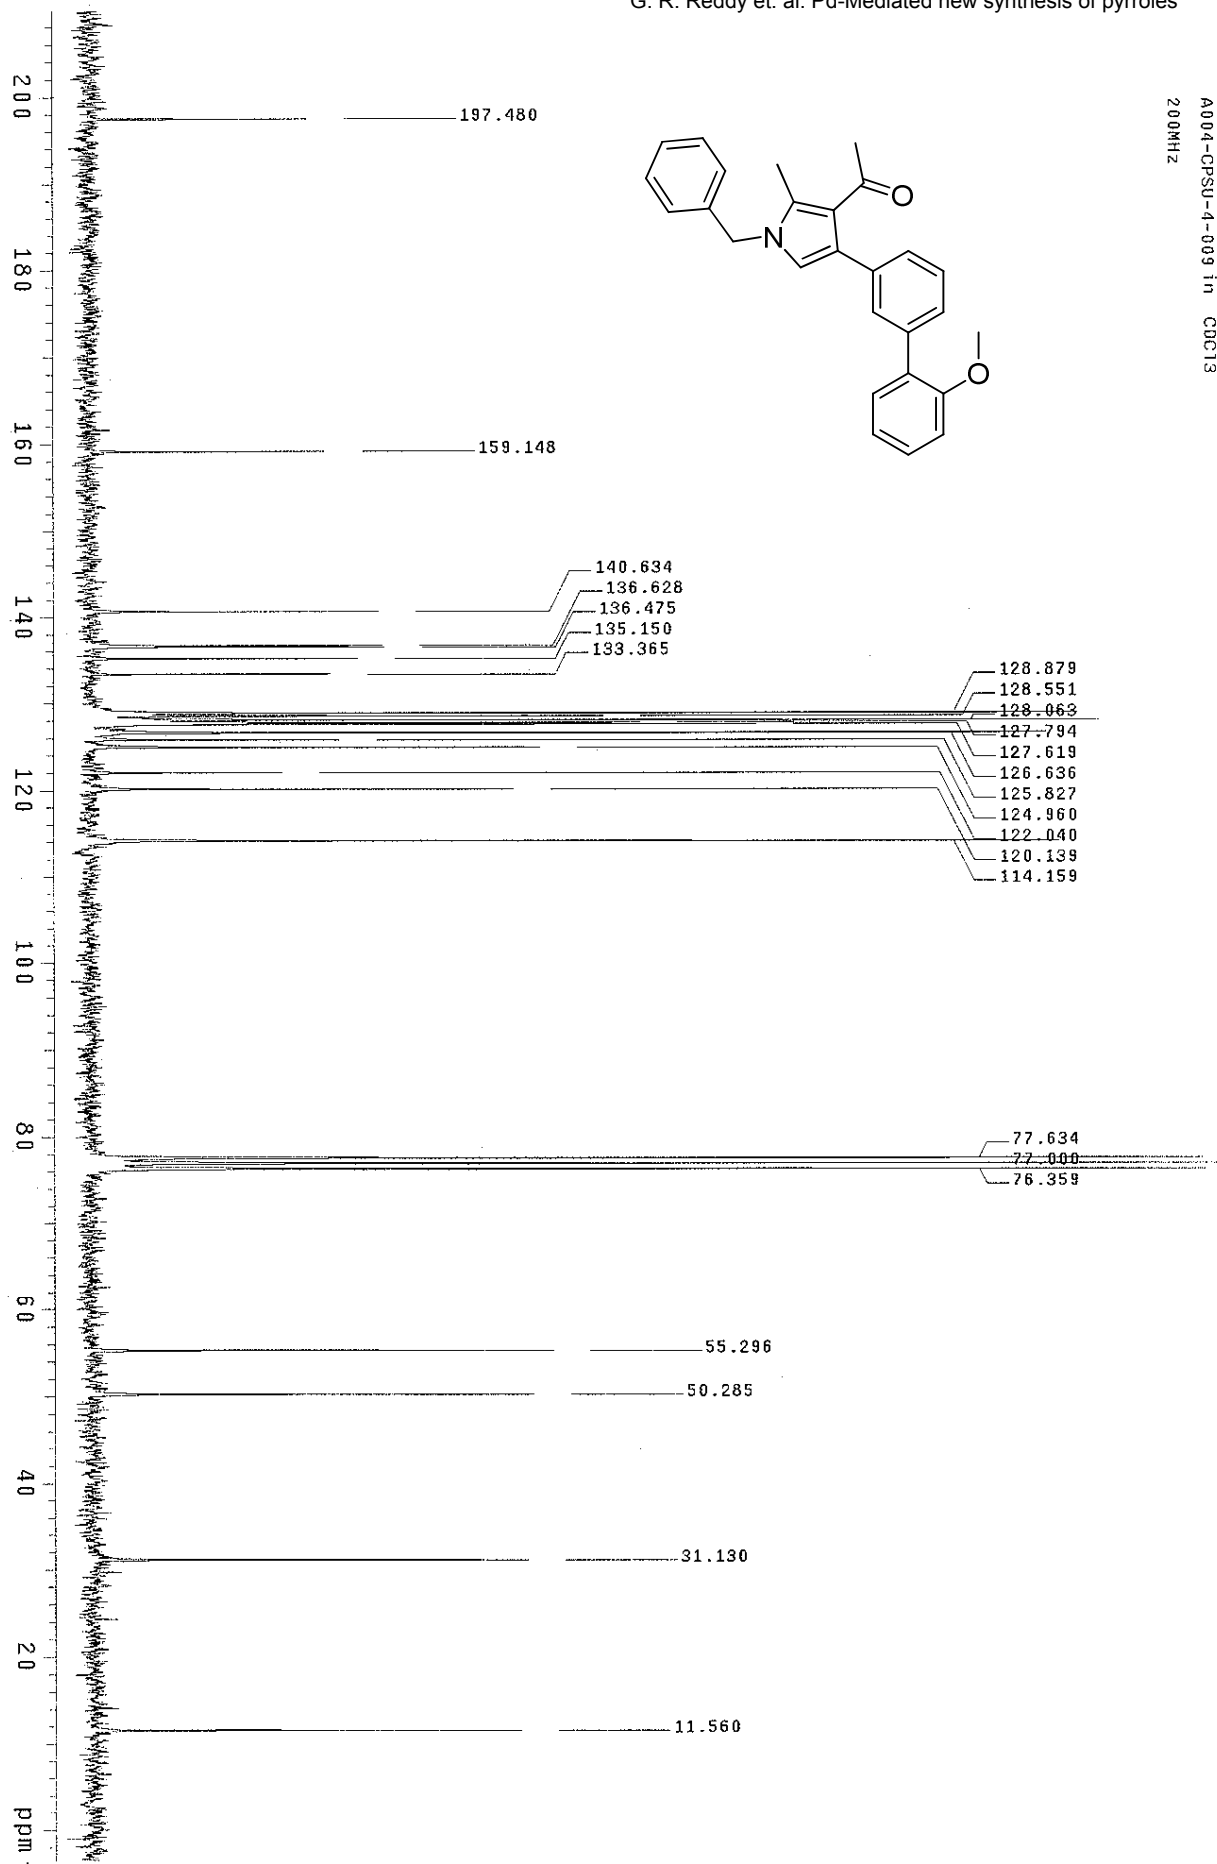

A004\CPSU-4\009  
UT1010\_196 21 (0.399) Cm (21:30-92:100)

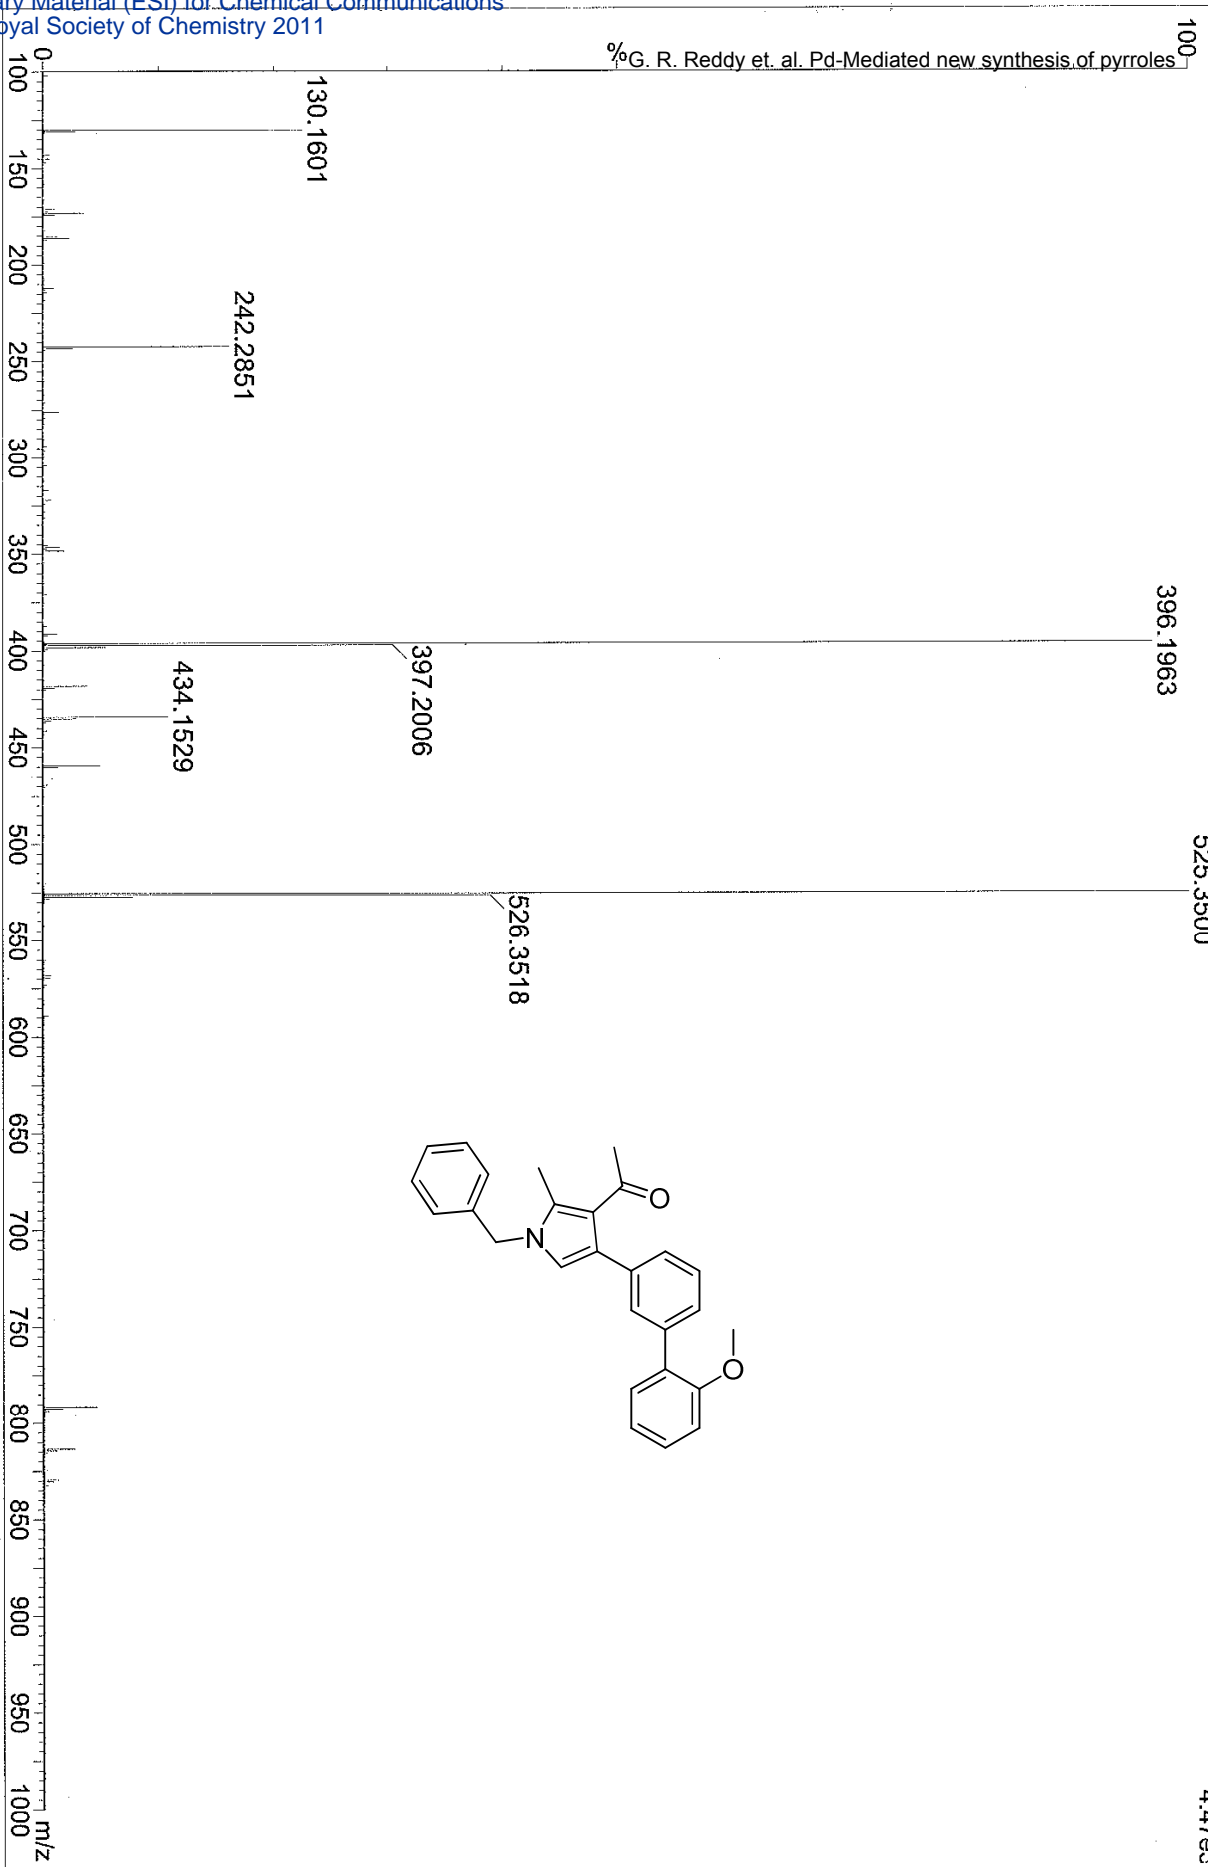

1: TOF MS ES+  
4.47e3

## Elemental Composition Report

### Single Mass Analysis

Tolerance = 5.0 PPM / DBE: min = -1.0, max = 80.0

Element prediction: Off

Number of isotope peaks used for i-FIT = 3

More isotopic Mass, Even Electron Ions

81 formula(e) evaluated with 1 results within limits (up to 4 closest results for each mass)

Elements Used:

C: 8-45 H: 0-70 N: 0-3 O: 0-3

A0027(CPSU-4)009

UT 910\_196 21 (0.399) Cm (21:30-92:100)

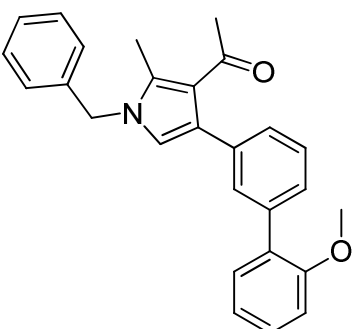

1: TOF MS ES  
4.47e+0

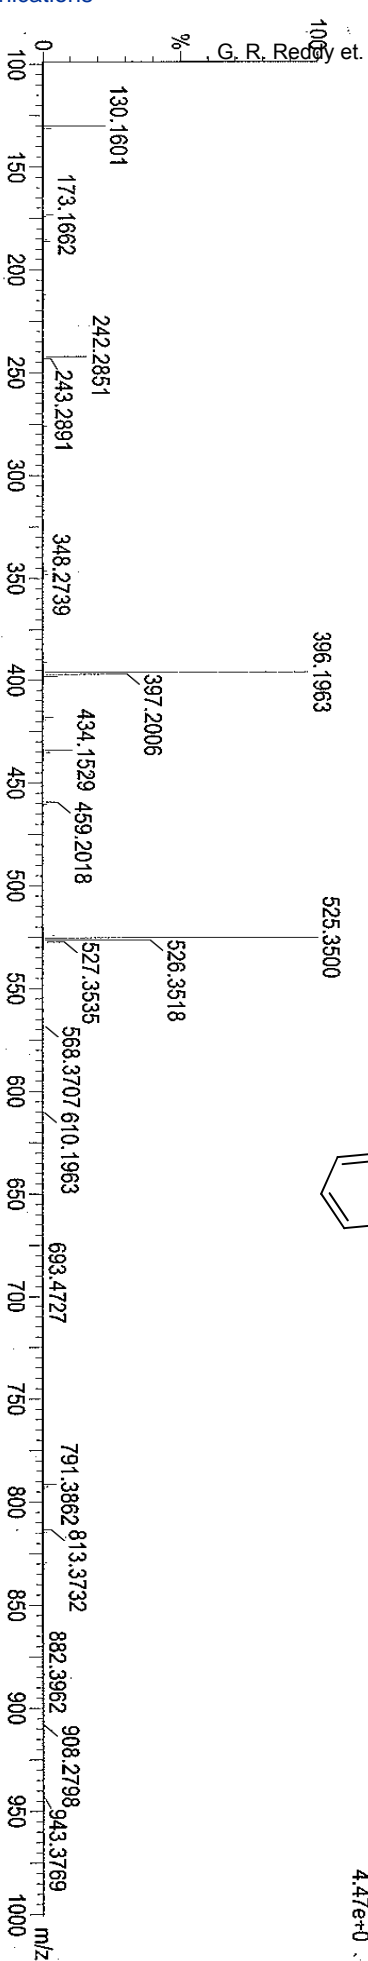

Minimum: -1.0  
Maximum: 80.0

| Mass     | Calc. Mass | mDa  | PPM  | DBE  | i-FIT | Formula      |
|----------|------------|------|------|------|-------|--------------|
| 396.1963 | 396.1964   | -0.1 | -0.3 | 15.5 | 1.5   | C27 H26 N O2 |

AU04-CF3B-4-010 in CDCl3  
NMR-400

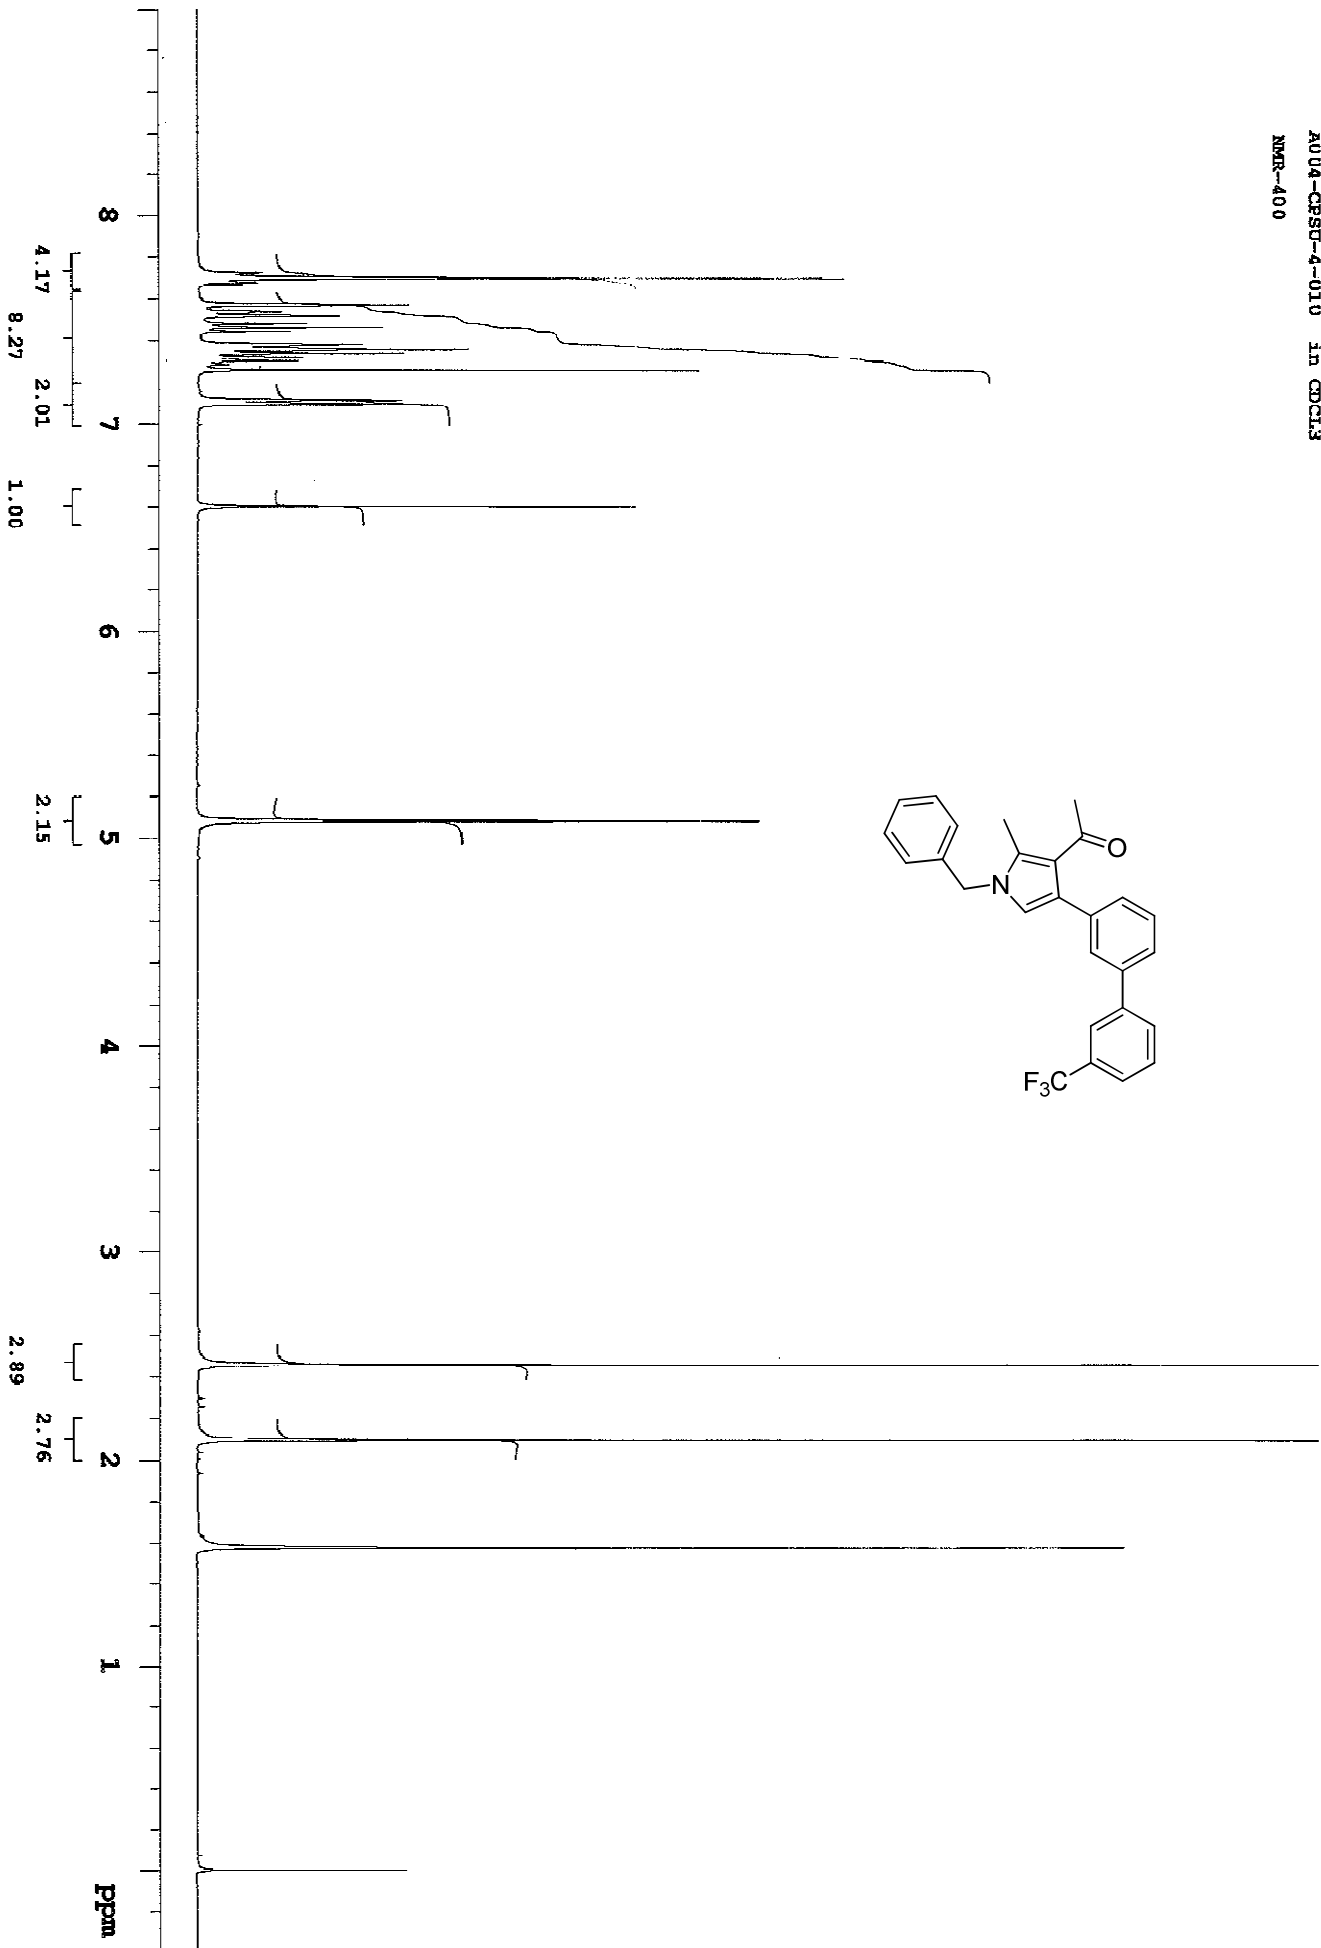

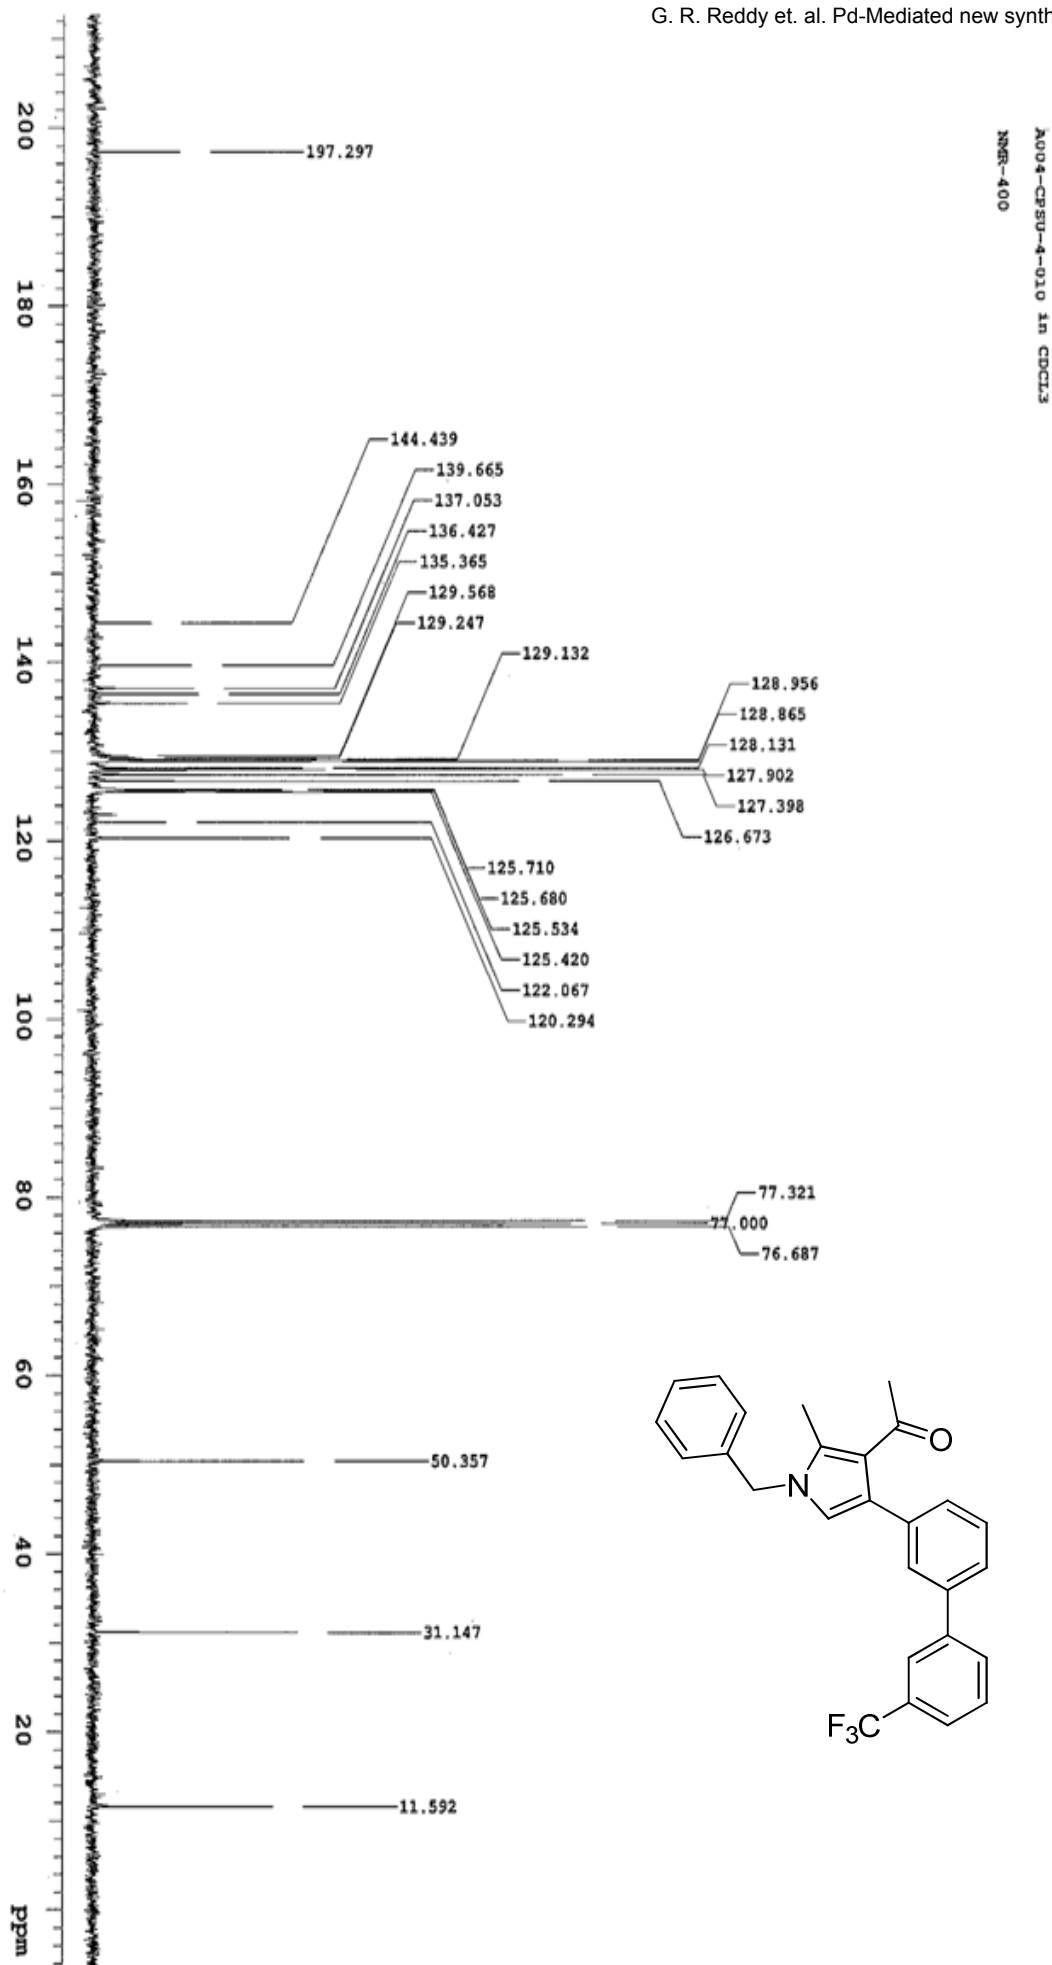

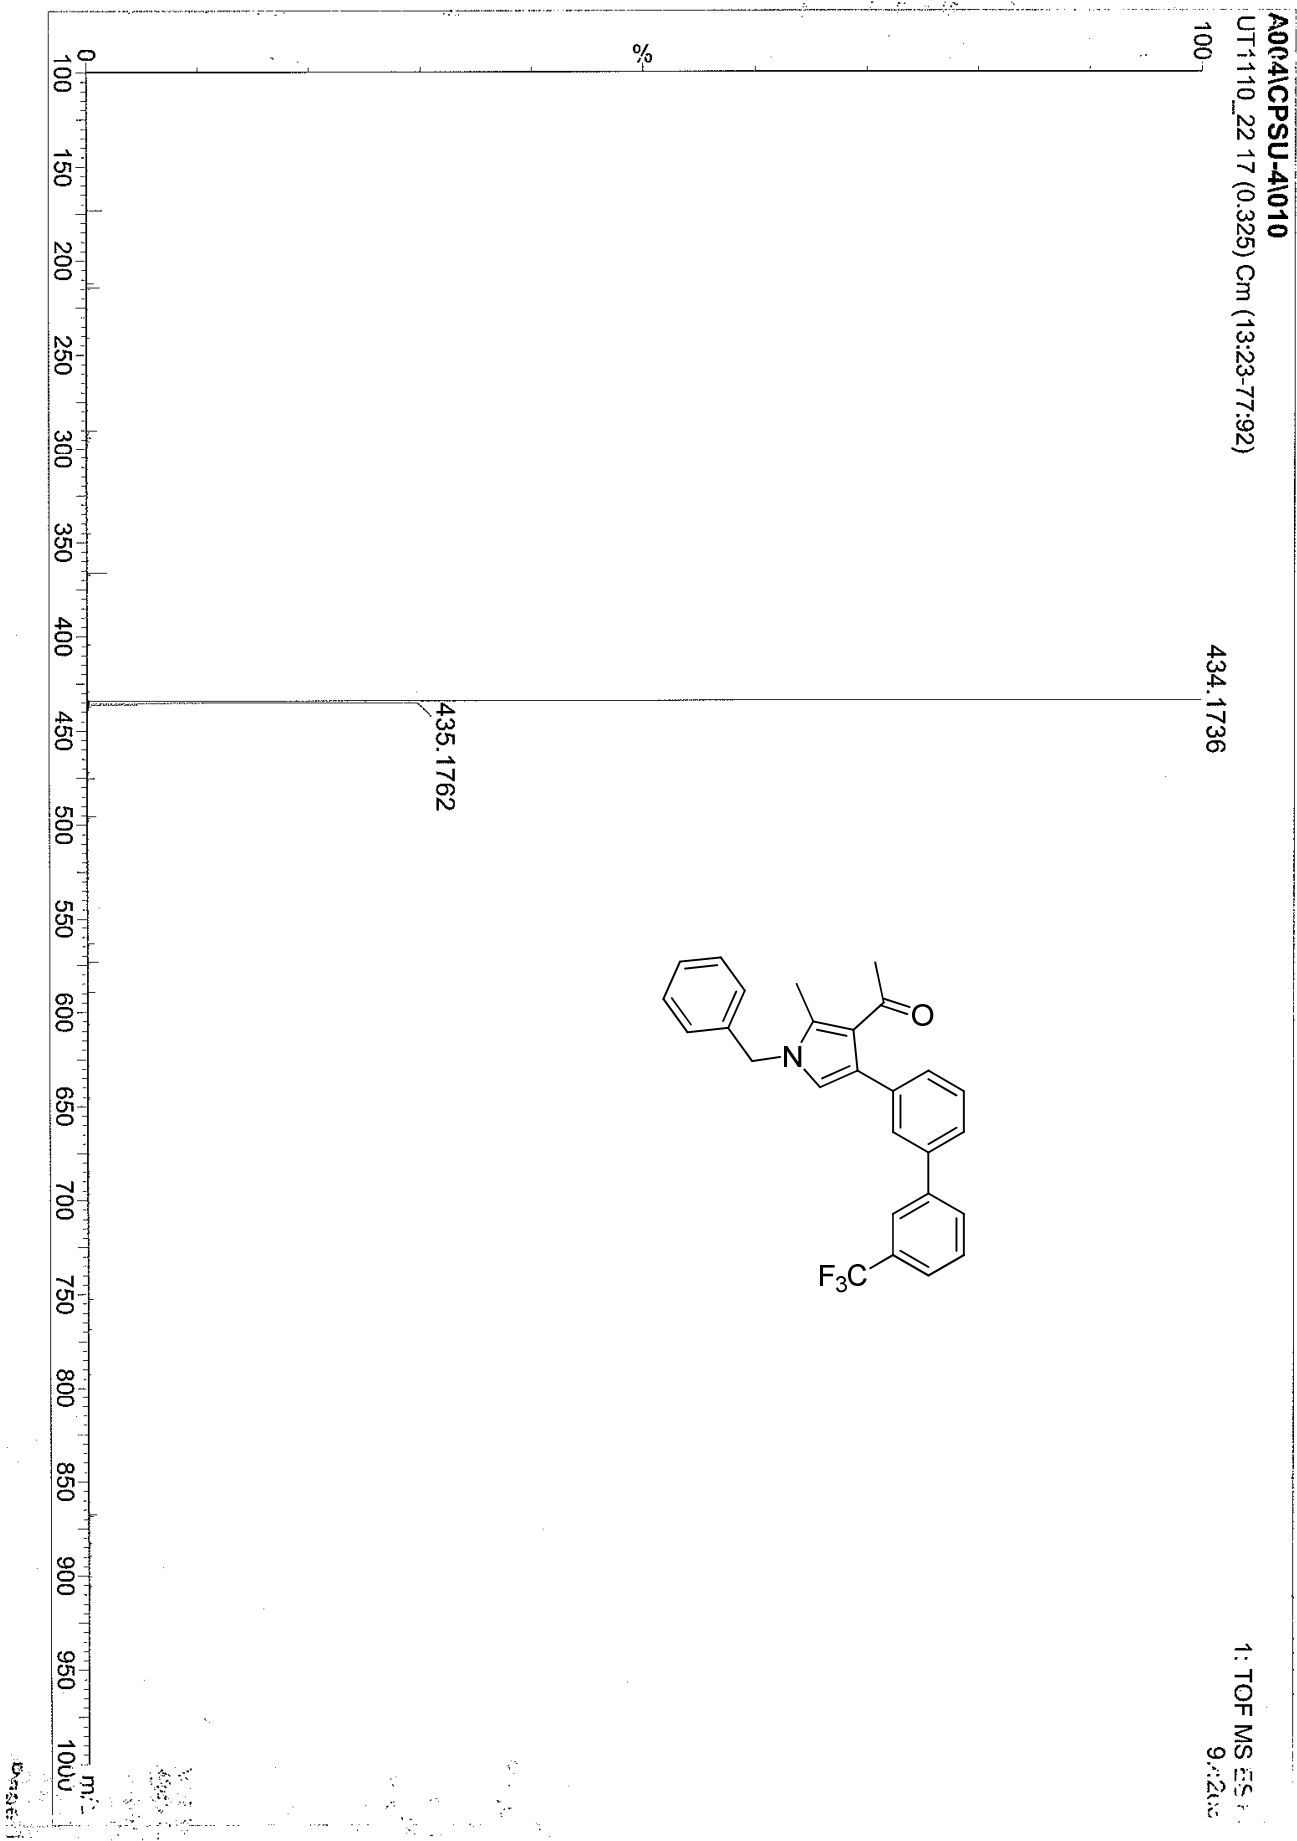



## Elemental Composition Report

### Single Mass Analysis

Tolerance = 5.0 PPM / DBE: min = -1.0, max = 80.0

Element prediction: Off

Number of isotope peaks used for i-FIT = 3

Monoisotopic Mass, Even Electron Ions

140 formula(e) evaluated with 2 results within limits (up to 4 best isotopic matches for each mass)

Elements Used:

C: 0-35 H: 0-45 N: 0-2 O: 0-2 F: 0-3

A004(CPSU-4)010

UT1110\_22 17 (0.325) Cm (13.23-77.92)

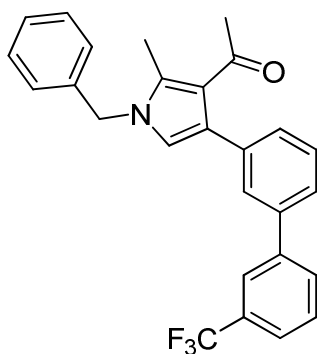

1: TOF MS MS  
9.125.30

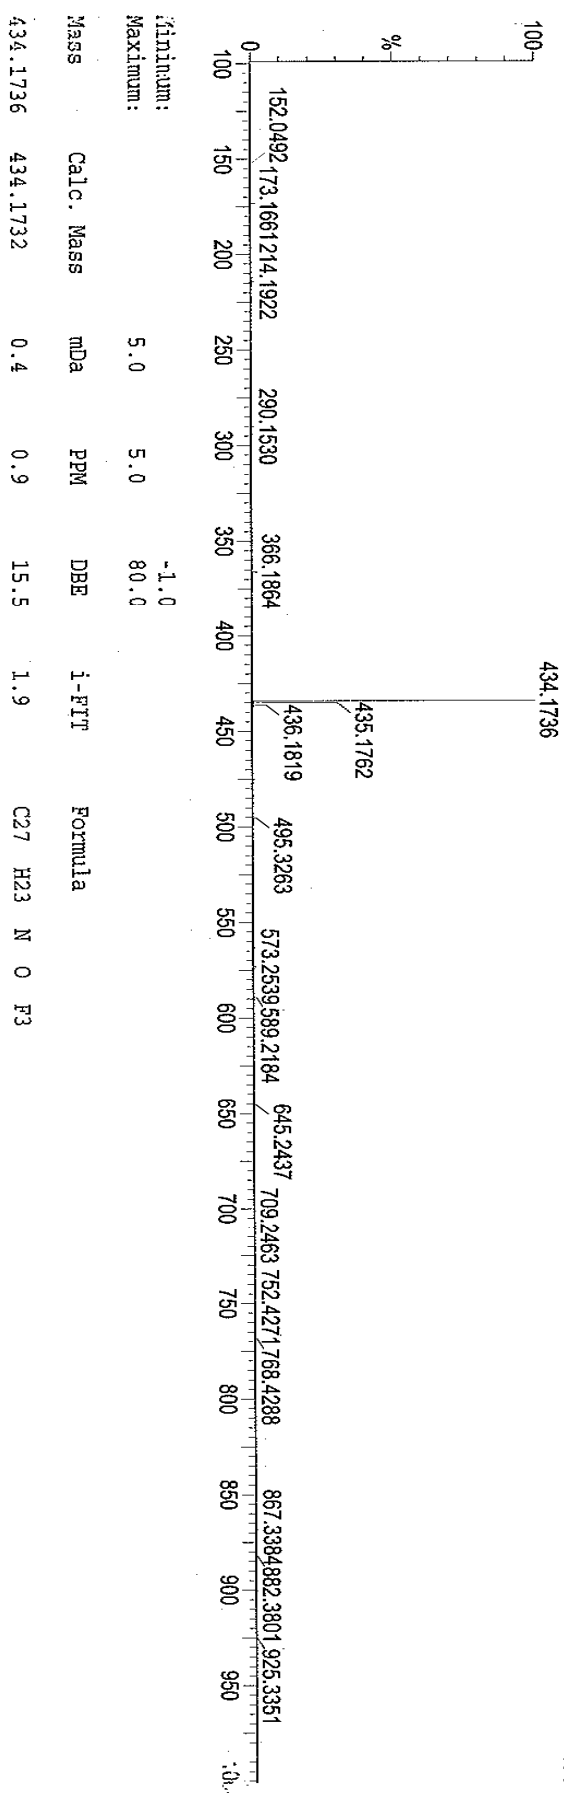

AU04/CPST-4/011 1H CDCl3  
NMR-400

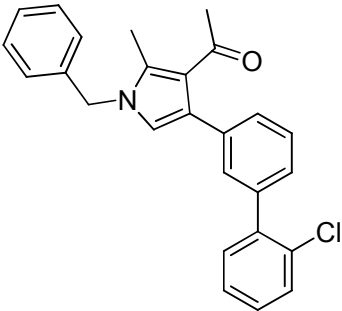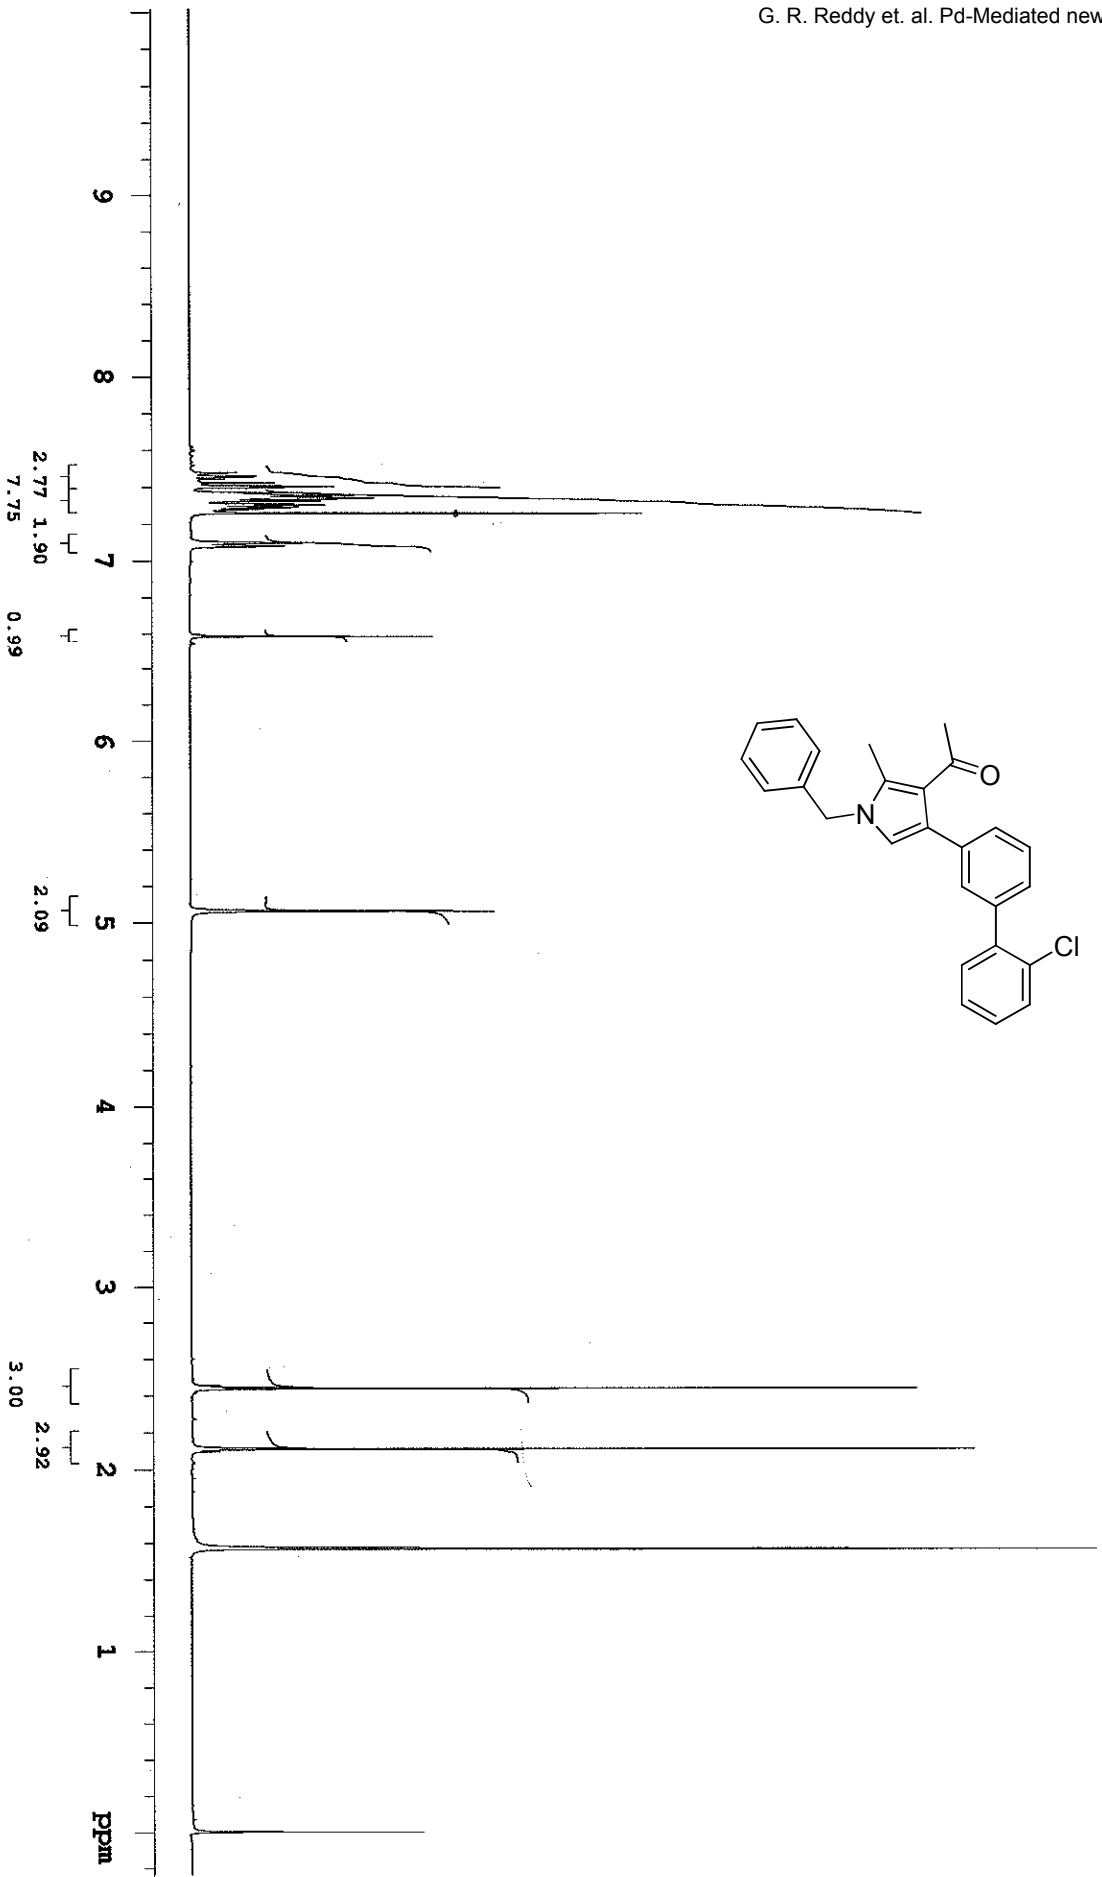

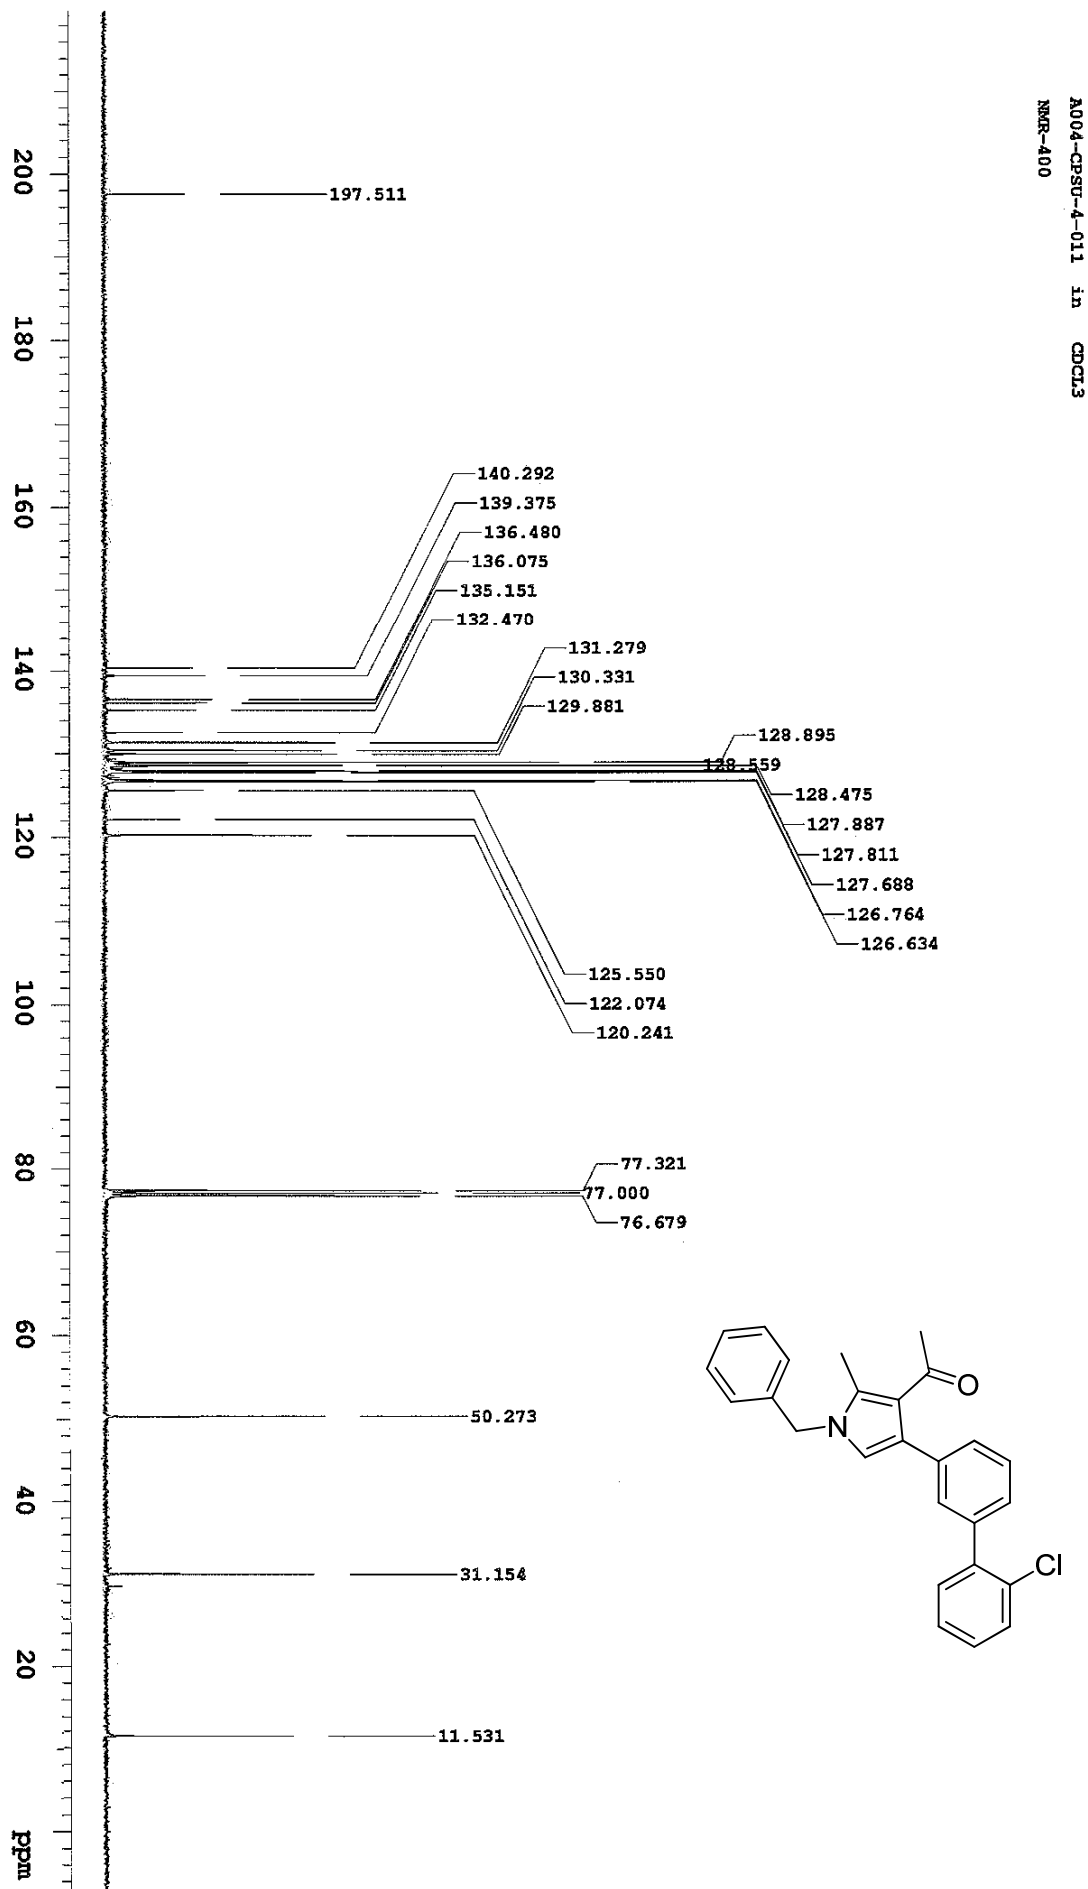

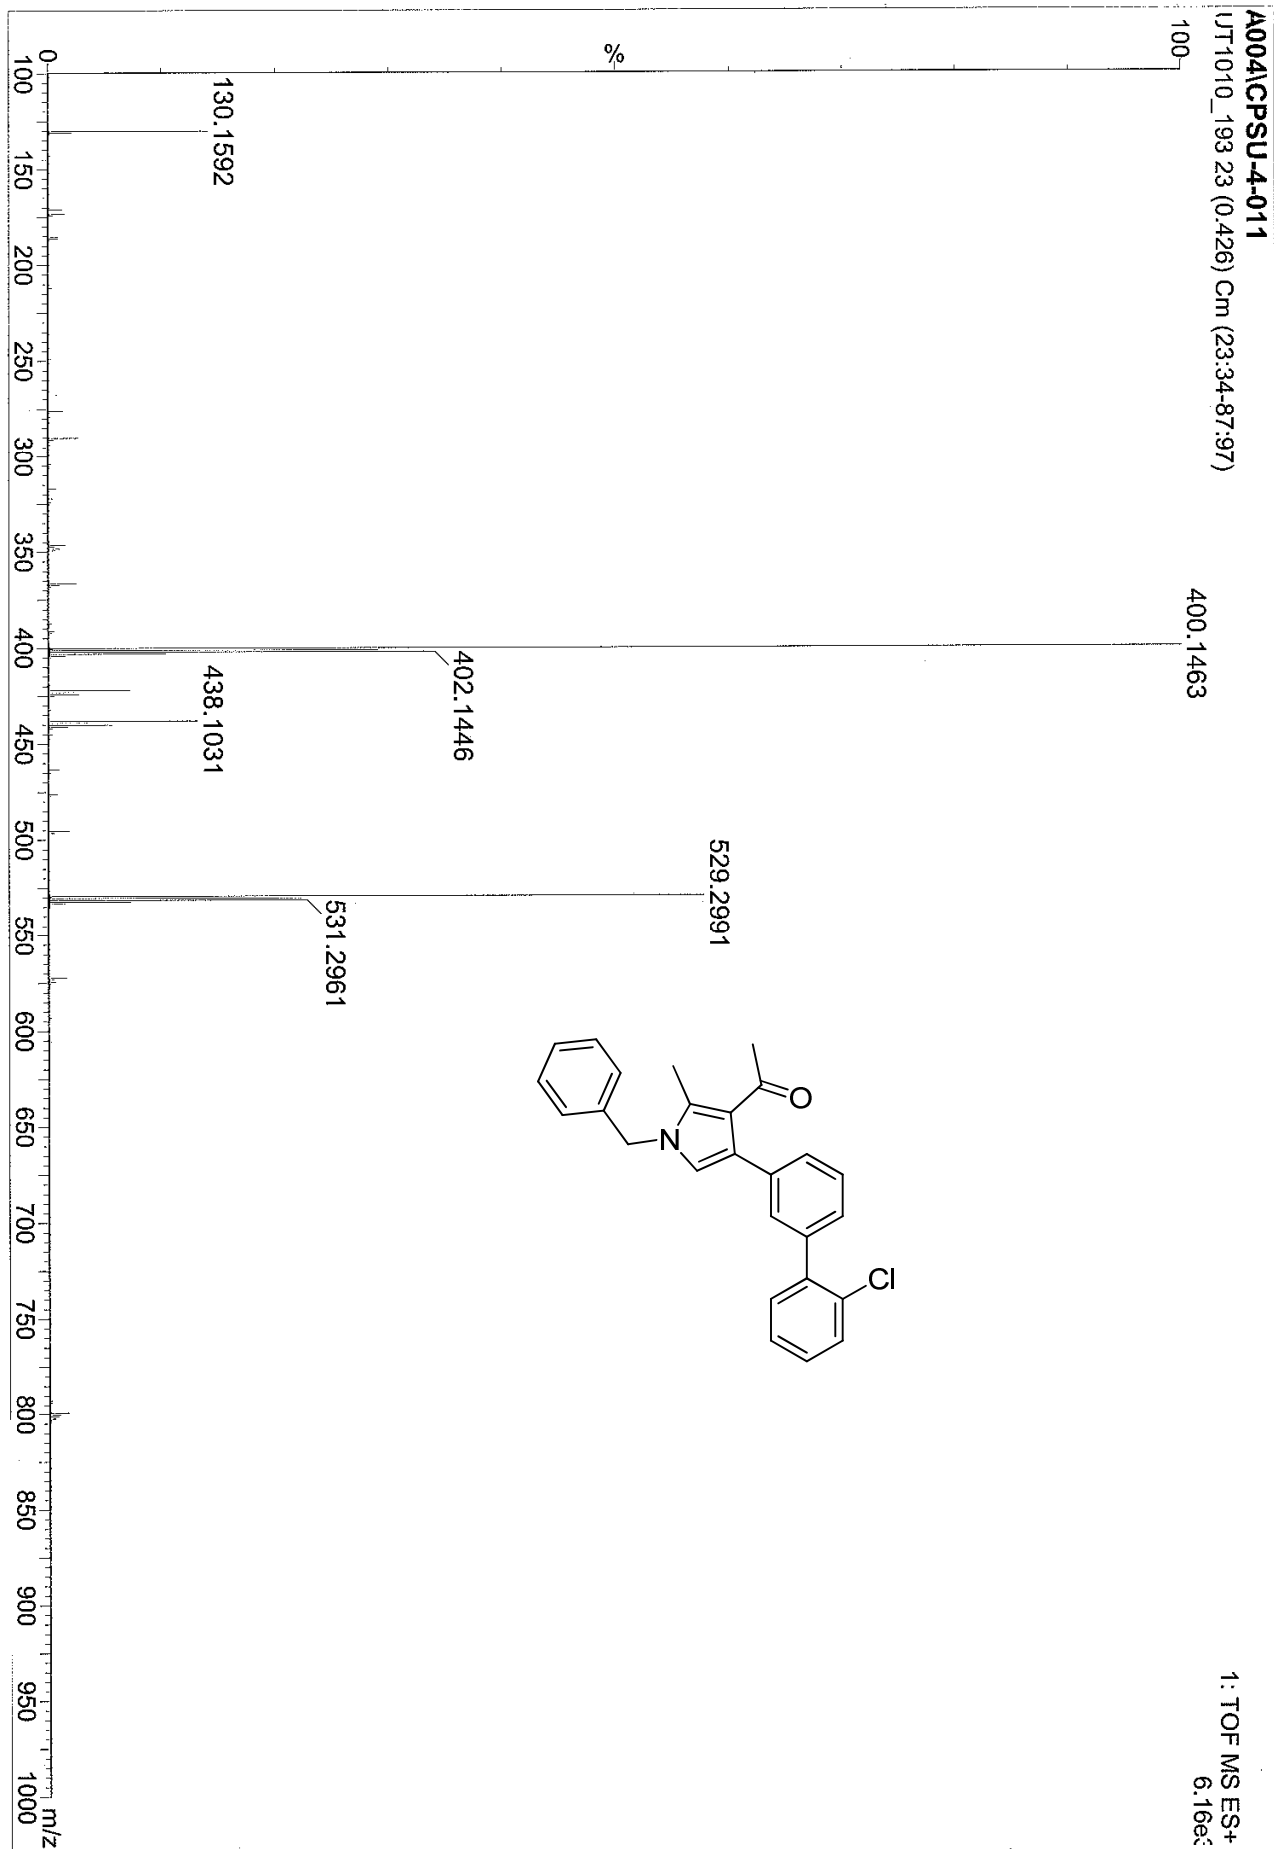

Elemental Composition Report

Single Mass Analysis

Tolerance = 5.0 PPM / DBE: min = -1.0, max = 80.0  
Element prediction: Off  
Number of isotope peaks used for I-FIT = 3

Monoisotopic Mass, Even Electron Ions  
1/1 formula(e) evaluated with 2 results within limits (up to 4 closest results for each mass)  
Elements Used:  
C: 0-45 H: 0-70 N: 0-3 O: 0-3 Cl: 0-1  
A: 04VCP5U-4-011  
U: 1010\_193 23 (0.426) Cm (23:34-87:97)

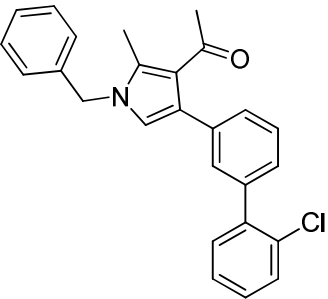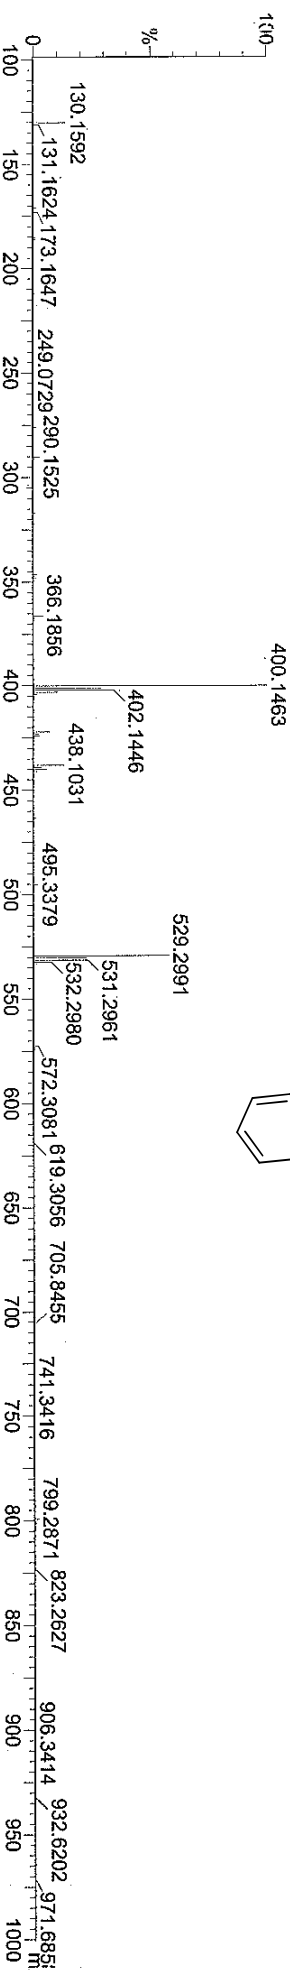

|                |            |      |      |      |       |
|----------------|------------|------|------|------|-------|
| Minimum:       |            |      |      |      |       |
| Maximum:       |            |      |      |      |       |
| Mass           | Calc. Mass | mDa  | PPM  | DBE  | I-FIT |
| 400.1463       | 400.1468   | -0.5 | -1.2 | 15.5 | 3.8   |
| Formula        |            |      |      |      |       |
| C26 H23 N O Cl |            |      |      |      |       |

A004-CPSU-4-012 in CDCl3  
1H NMR-400

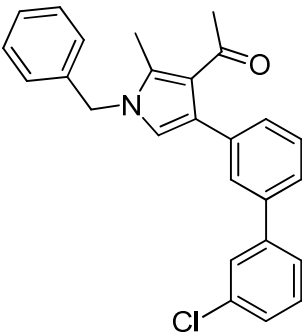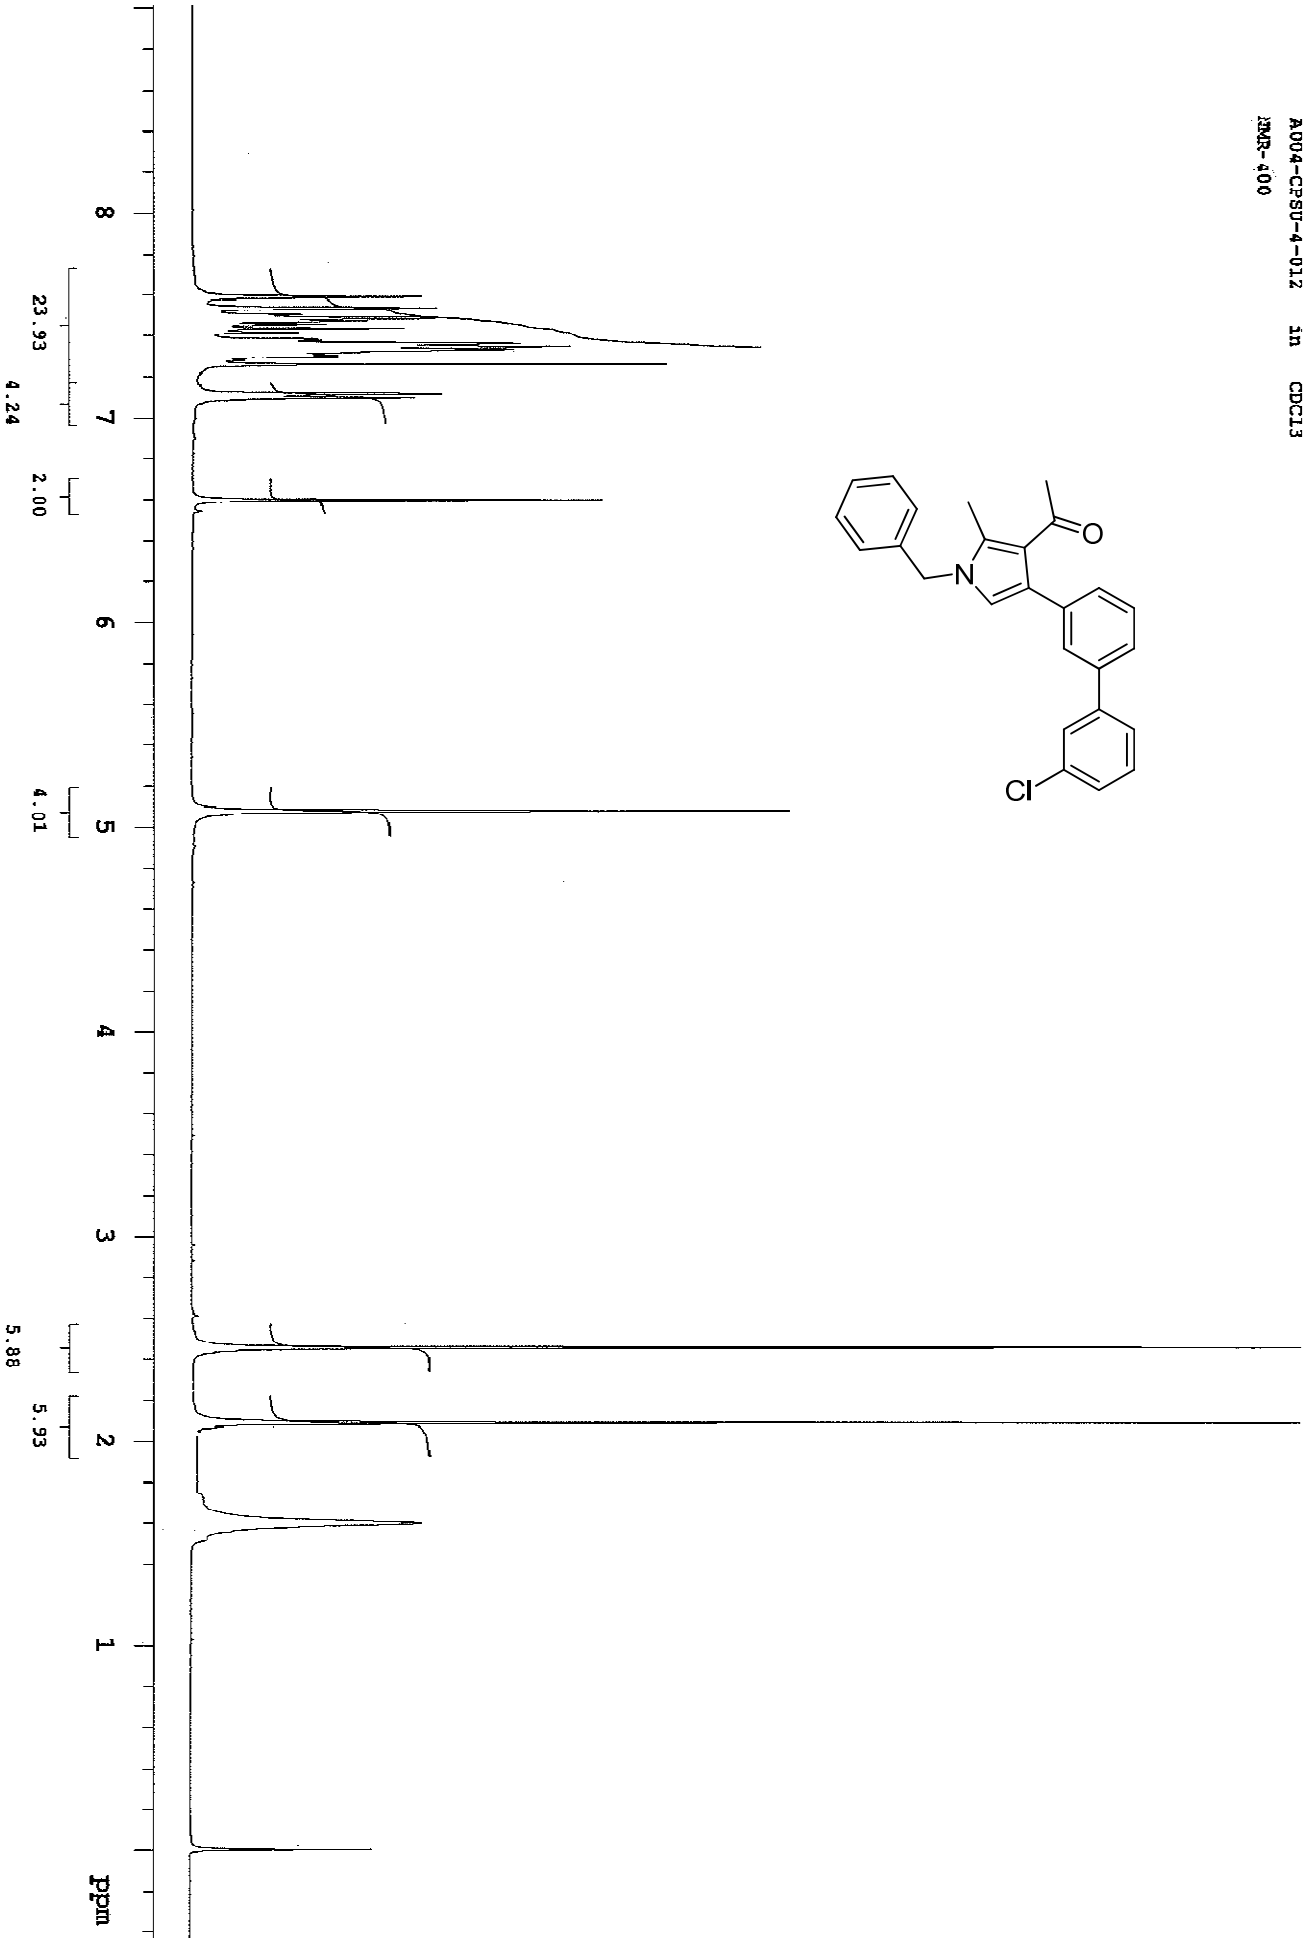

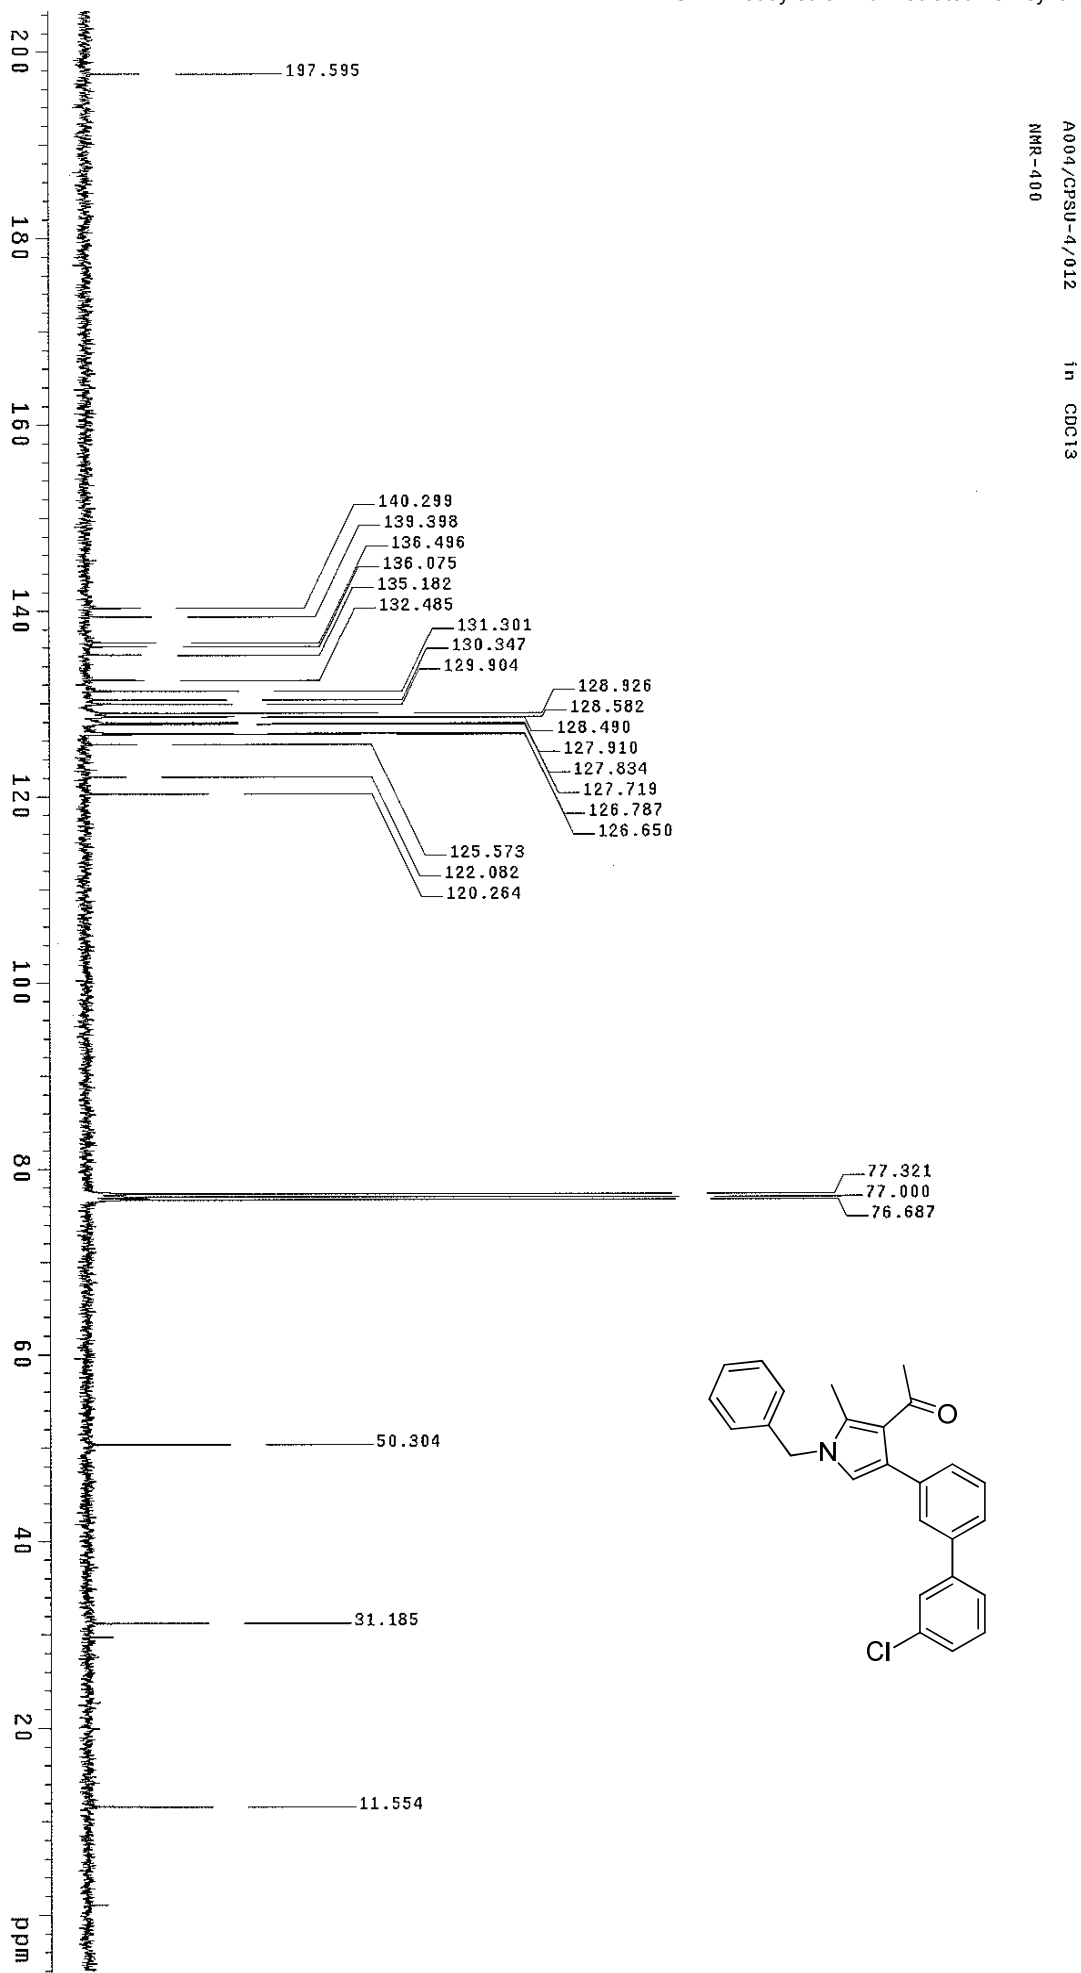

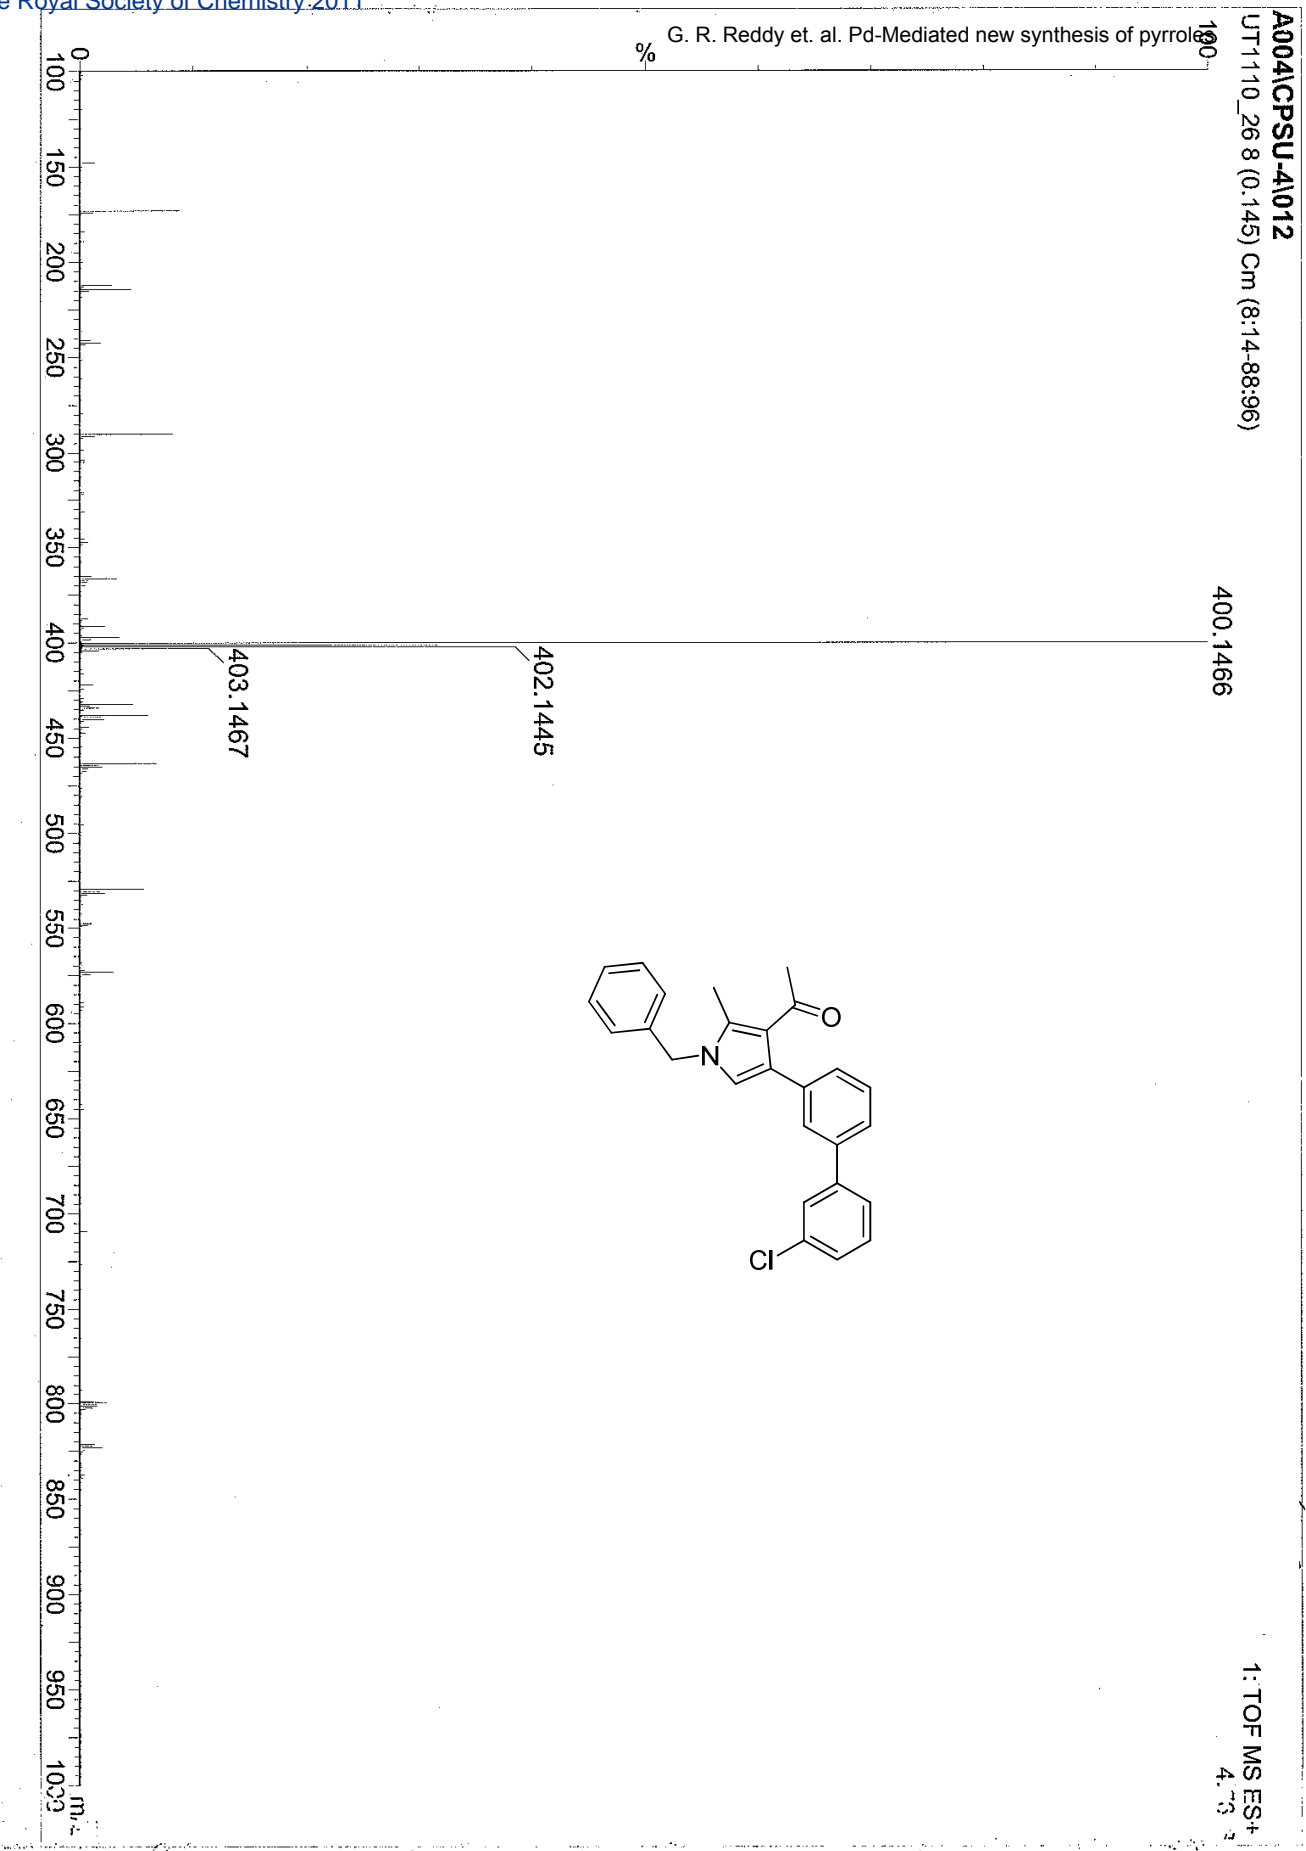



### Single Mass Analysis

Element prediction: Off

Number of isotope peaks used for i-FIT = 3

### Monoisotopic Mass, Even Electron Ions

7. Formula(e) evaluated with 1 results within limits (up to 4 best isotopic matches for each mass)

### Elements Used:

C<sub>5</sub>O-35 H: 0-45 N: 0-2 O: 0-2 Cl: 0-1

AS04\CPJU-4\012

$\nu_{\text{D}}$  1110.268 (0.145)  $\text{cm}^{-1}$  (8:14-88:96)

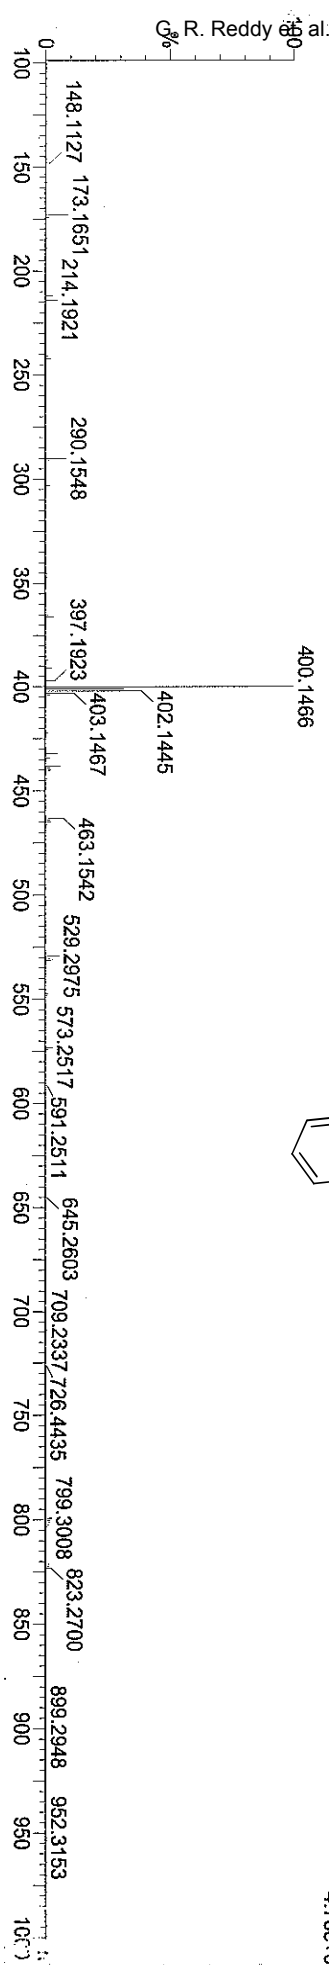

|          |      |
|----------|------|
| Minimum: | -1.0 |
| Maximum: | 80.0 |
|          | 5.0  |

| Mass     | Calc. Mass | mDa  | PPM  | DBE  | i-FTT | Formula        |
|----------|------------|------|------|------|-------|----------------|
| 400.1466 | 400.1468   | -0.2 | -0.5 | 15.5 | 3.5   | C26 H23 N O Cl |

A004-CPSU-4-013 1H CDCl3  
NMR-400

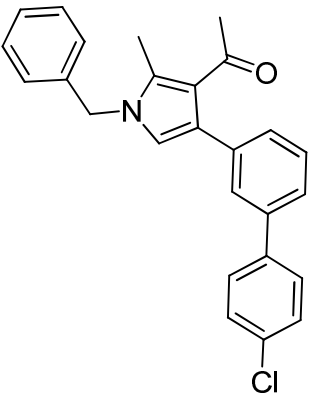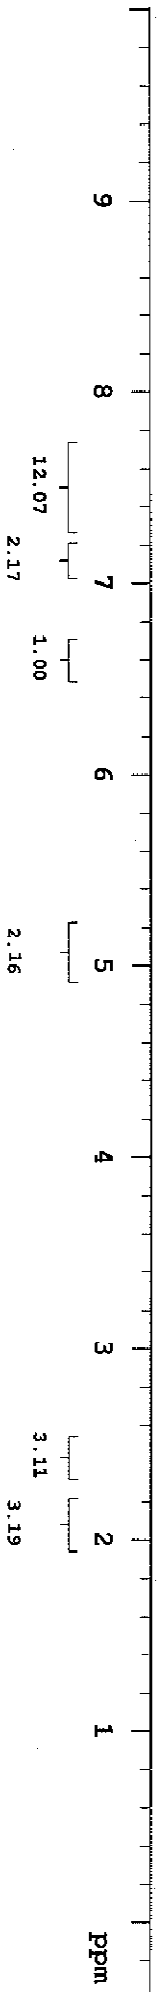

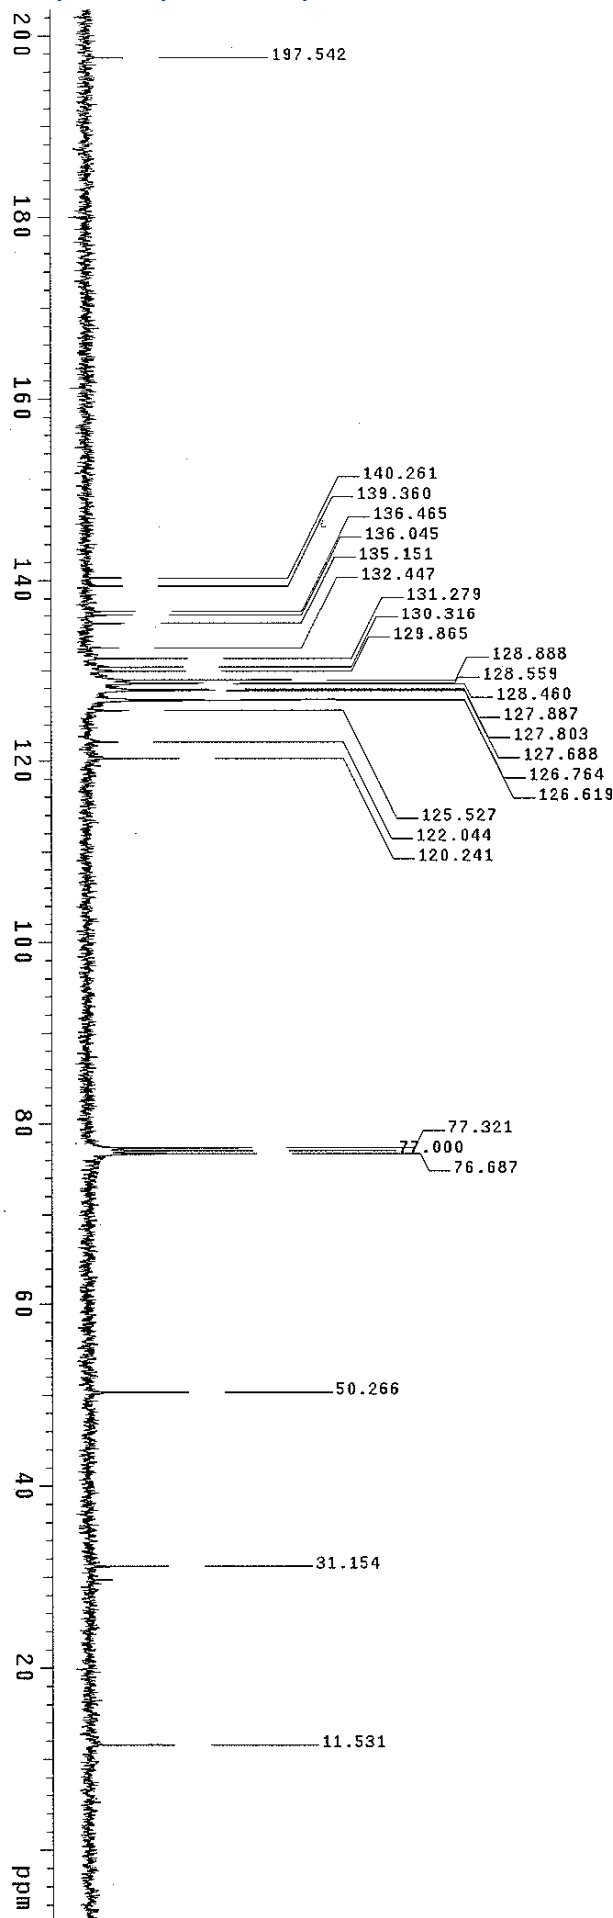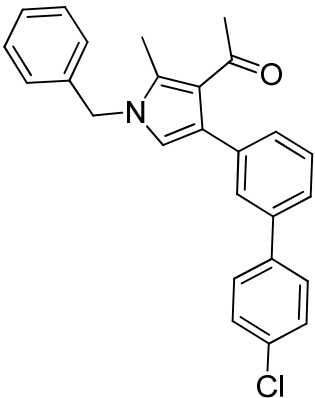

G. R. Reddy et. al. Pd-Mediated new synthesis of pyrroles

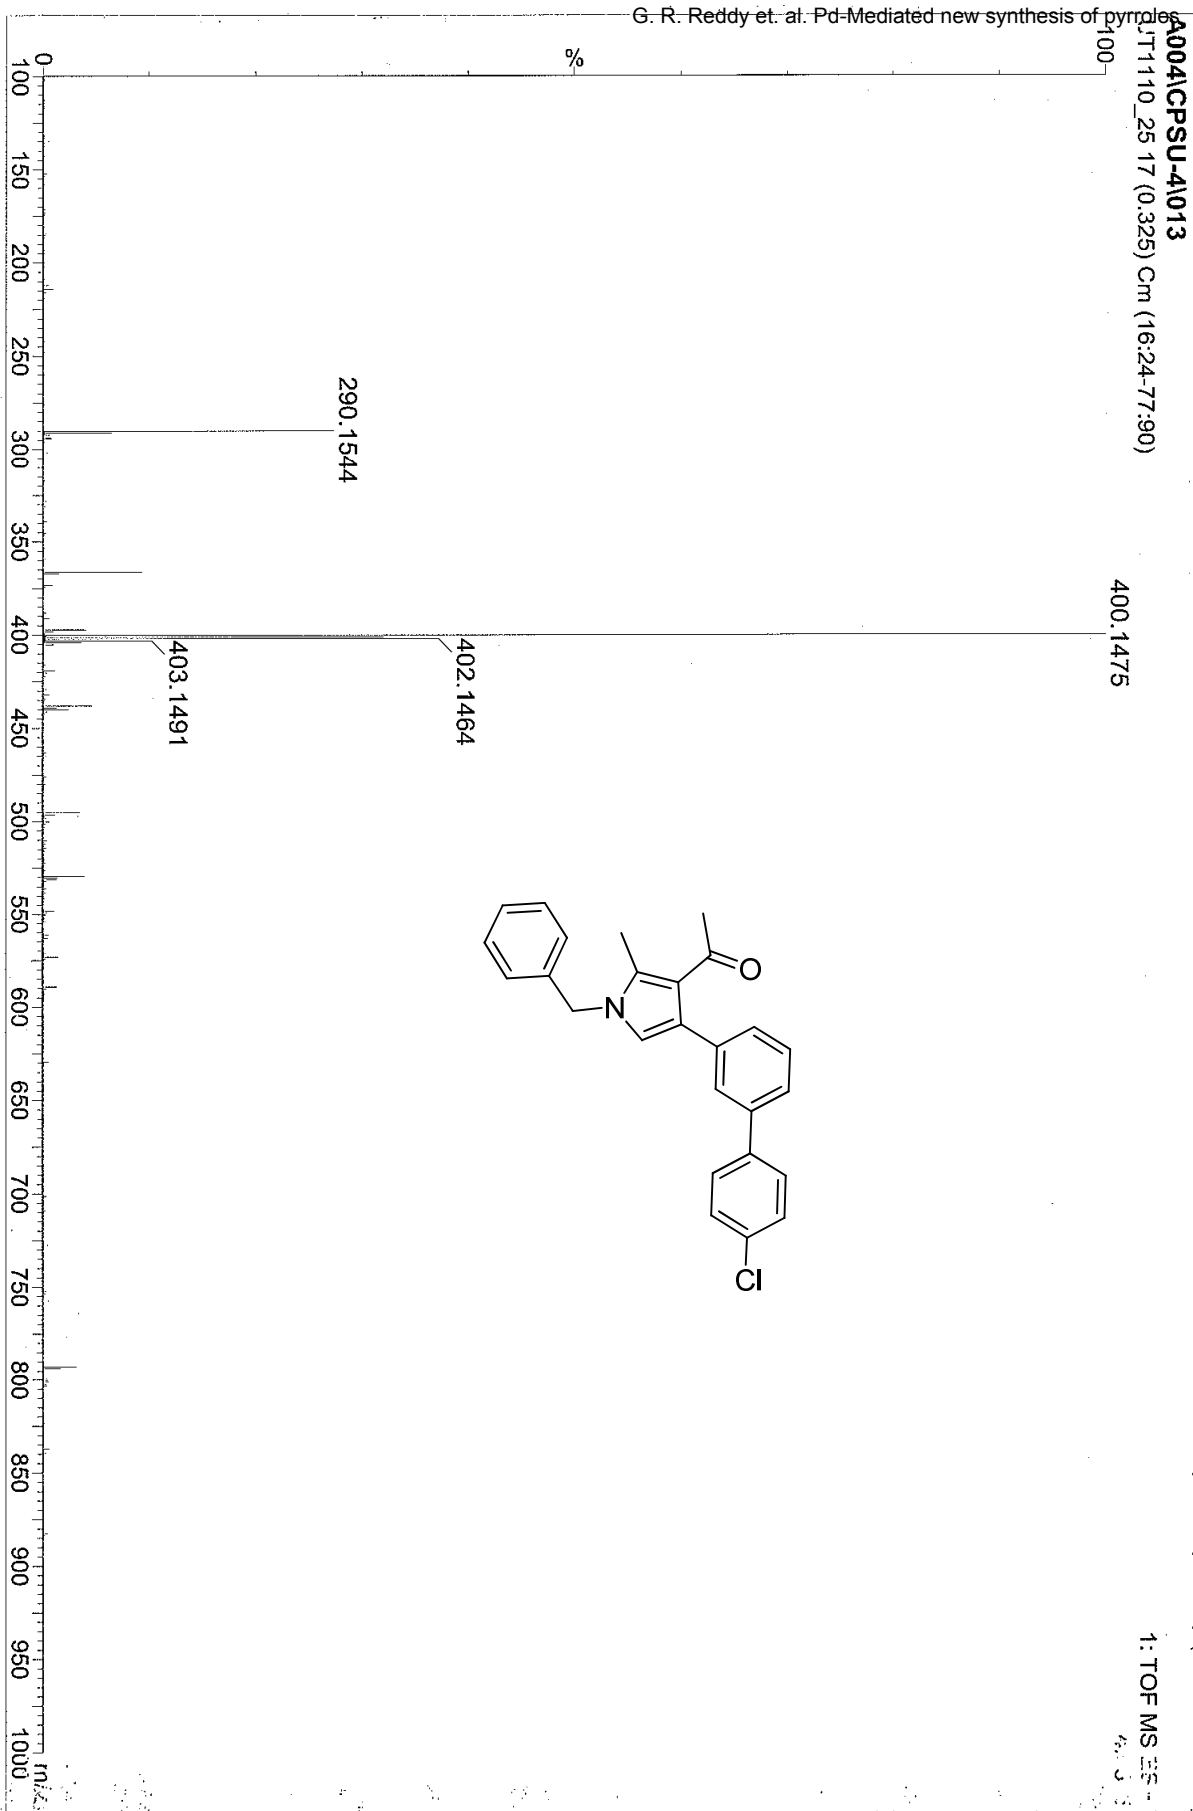

## Elemental Composition Report

### Single Mass Analysis

Tolerance = 5.0 PPM / DBE: min = -1.0, max = 80.0

Element prediction: Off

Number of isotope peaks used for i-FIT = 3

Monoisotopic Mass, Even Electron Ions

Formula(s) evaluated with 1 results within limits (up to 4 best isotopic matches for each mass)

Elements Used:

C: 8-35 H: 0-45 N: 0-2 O: 0-2 Cl: 0-1

ADONIS: CPSU-41013

UT110\_25 17 (0.325) Cm (16:24-77:90)

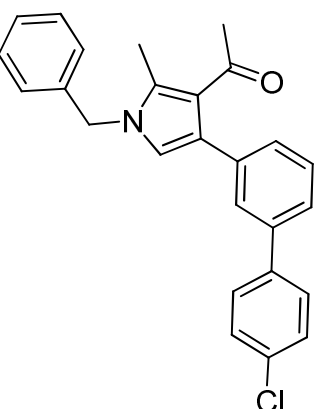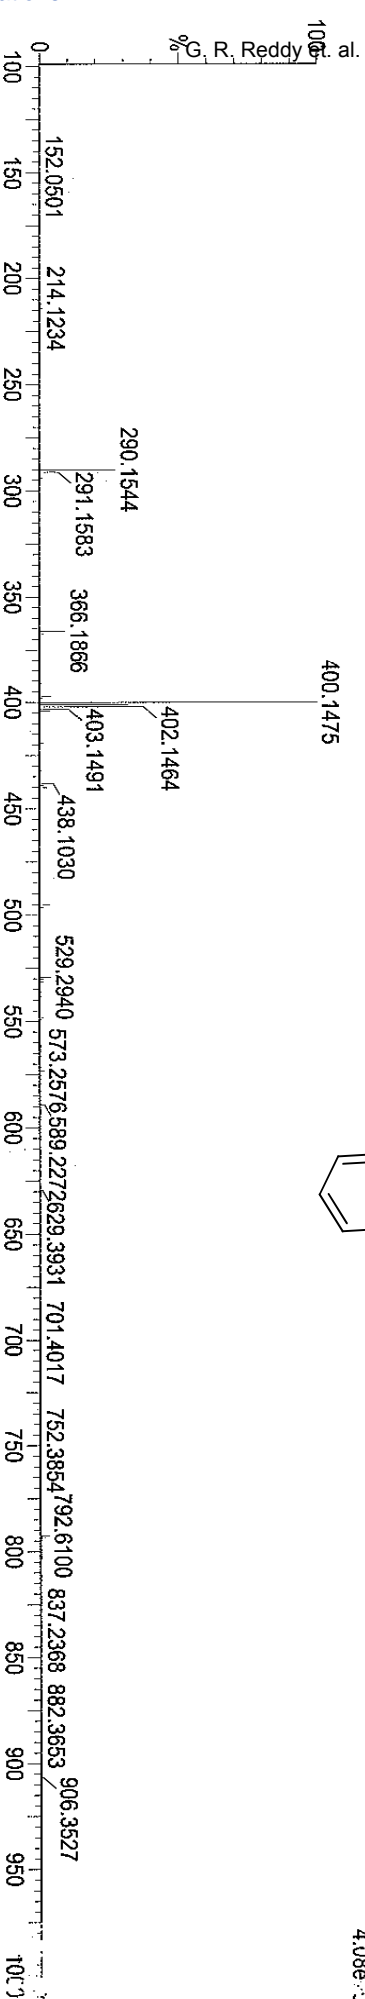

Minimum: -1.0  
Maximum: 80.0

| Mass     | Calc. Mass | MDa | PPM | DBE  | i-FIT | Formula                                                          |
|----------|------------|-----|-----|------|-------|------------------------------------------------------------------|
| 400.1475 | 400.1468   | 0.7 | 1.7 | 15.5 | 3.0   | C <sub>26</sub> H <sub>23</sub> N <sub>2</sub> O <sub>2</sub> Cl |

AU04/CPST-4/014 1H CDCl3  
NMR-400

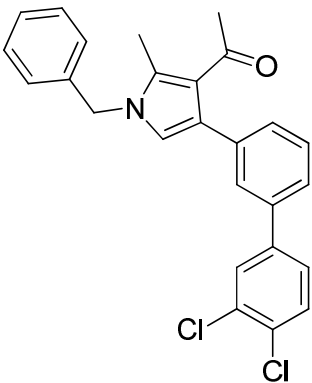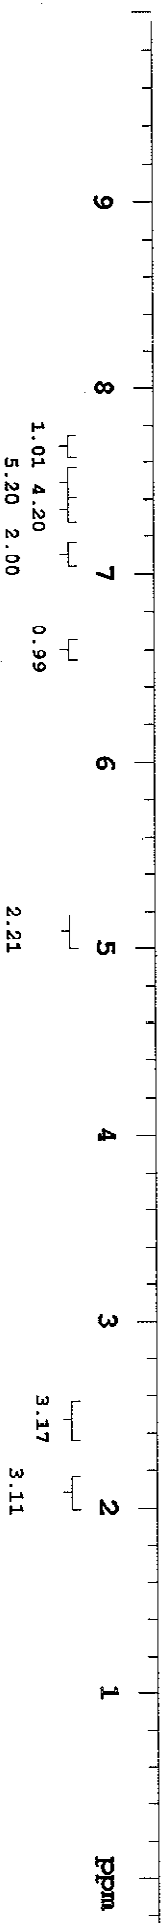

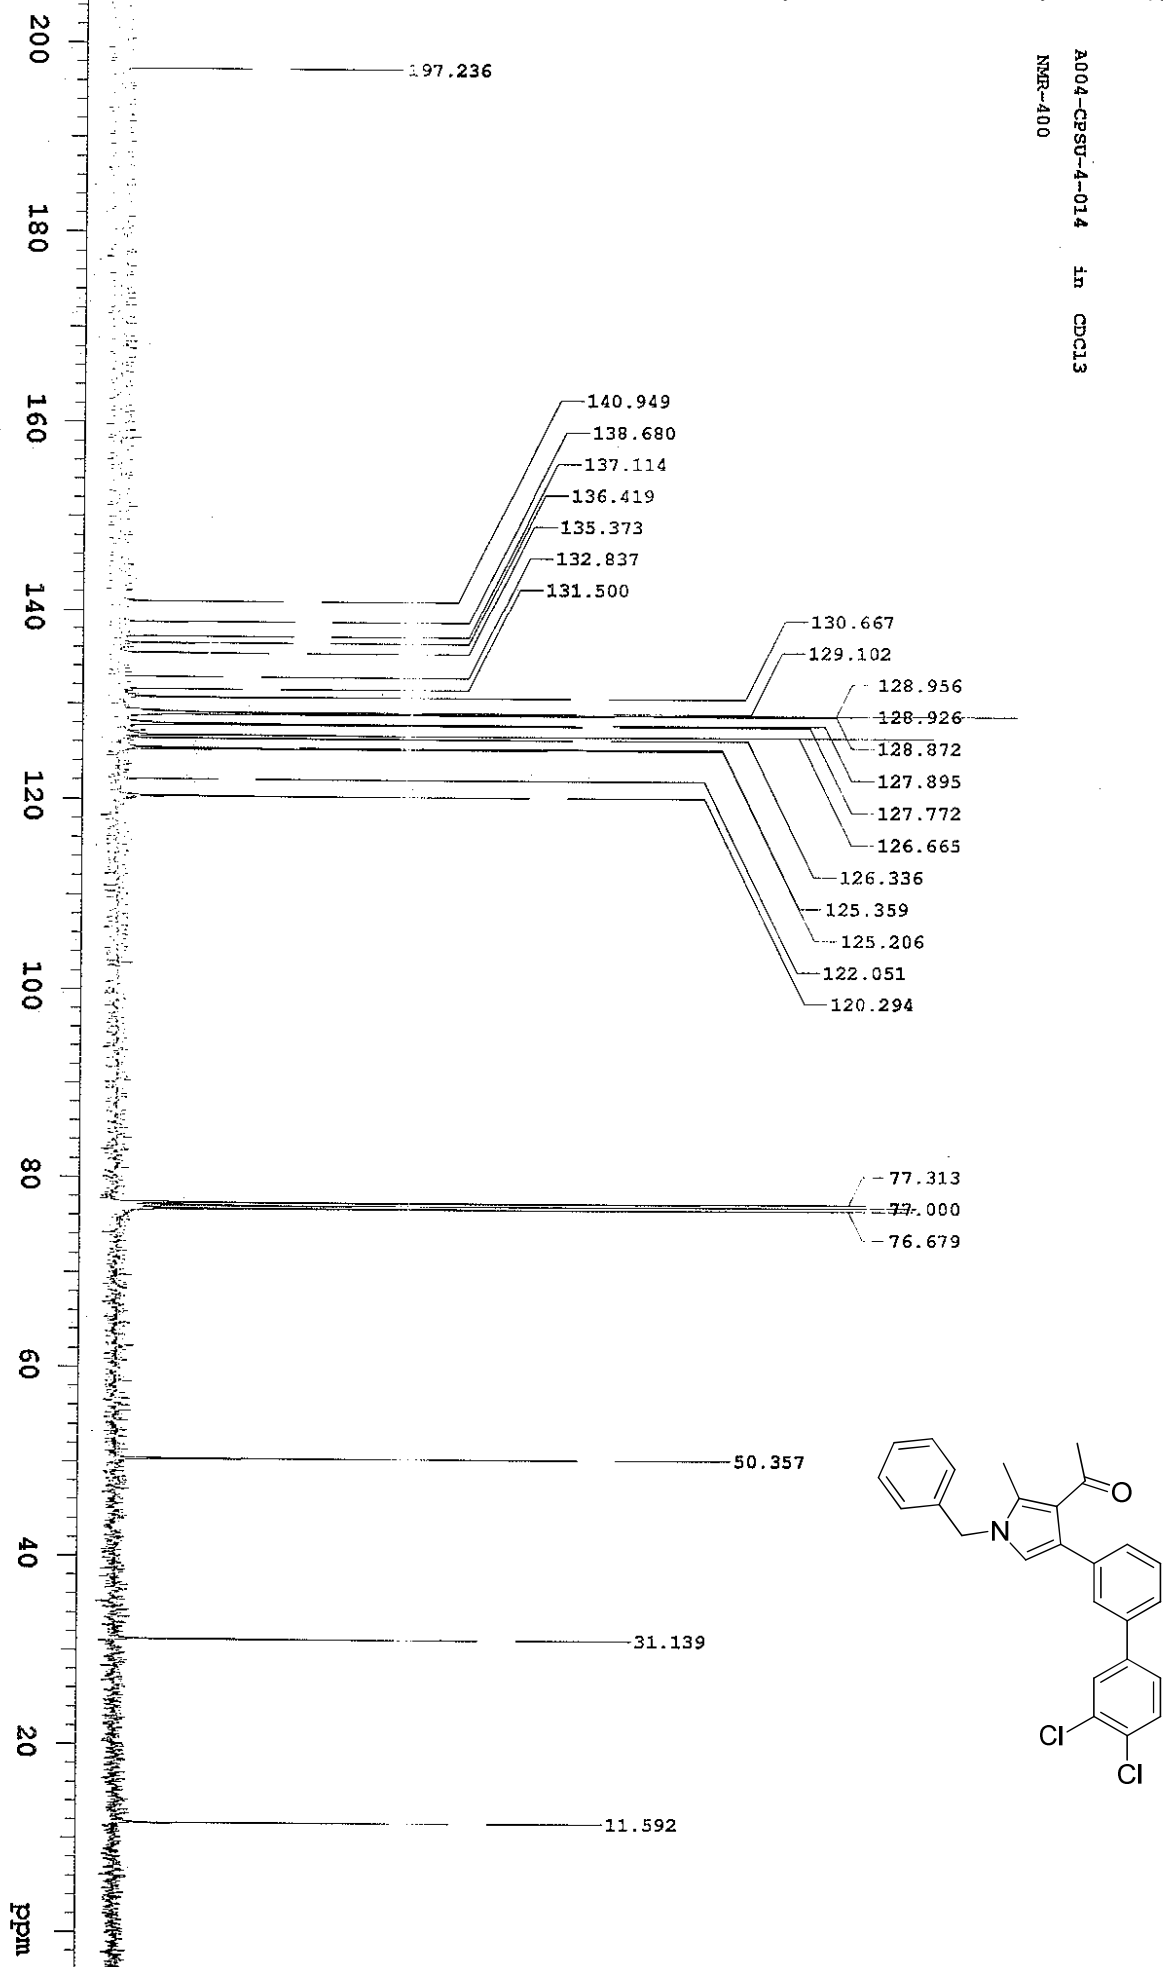

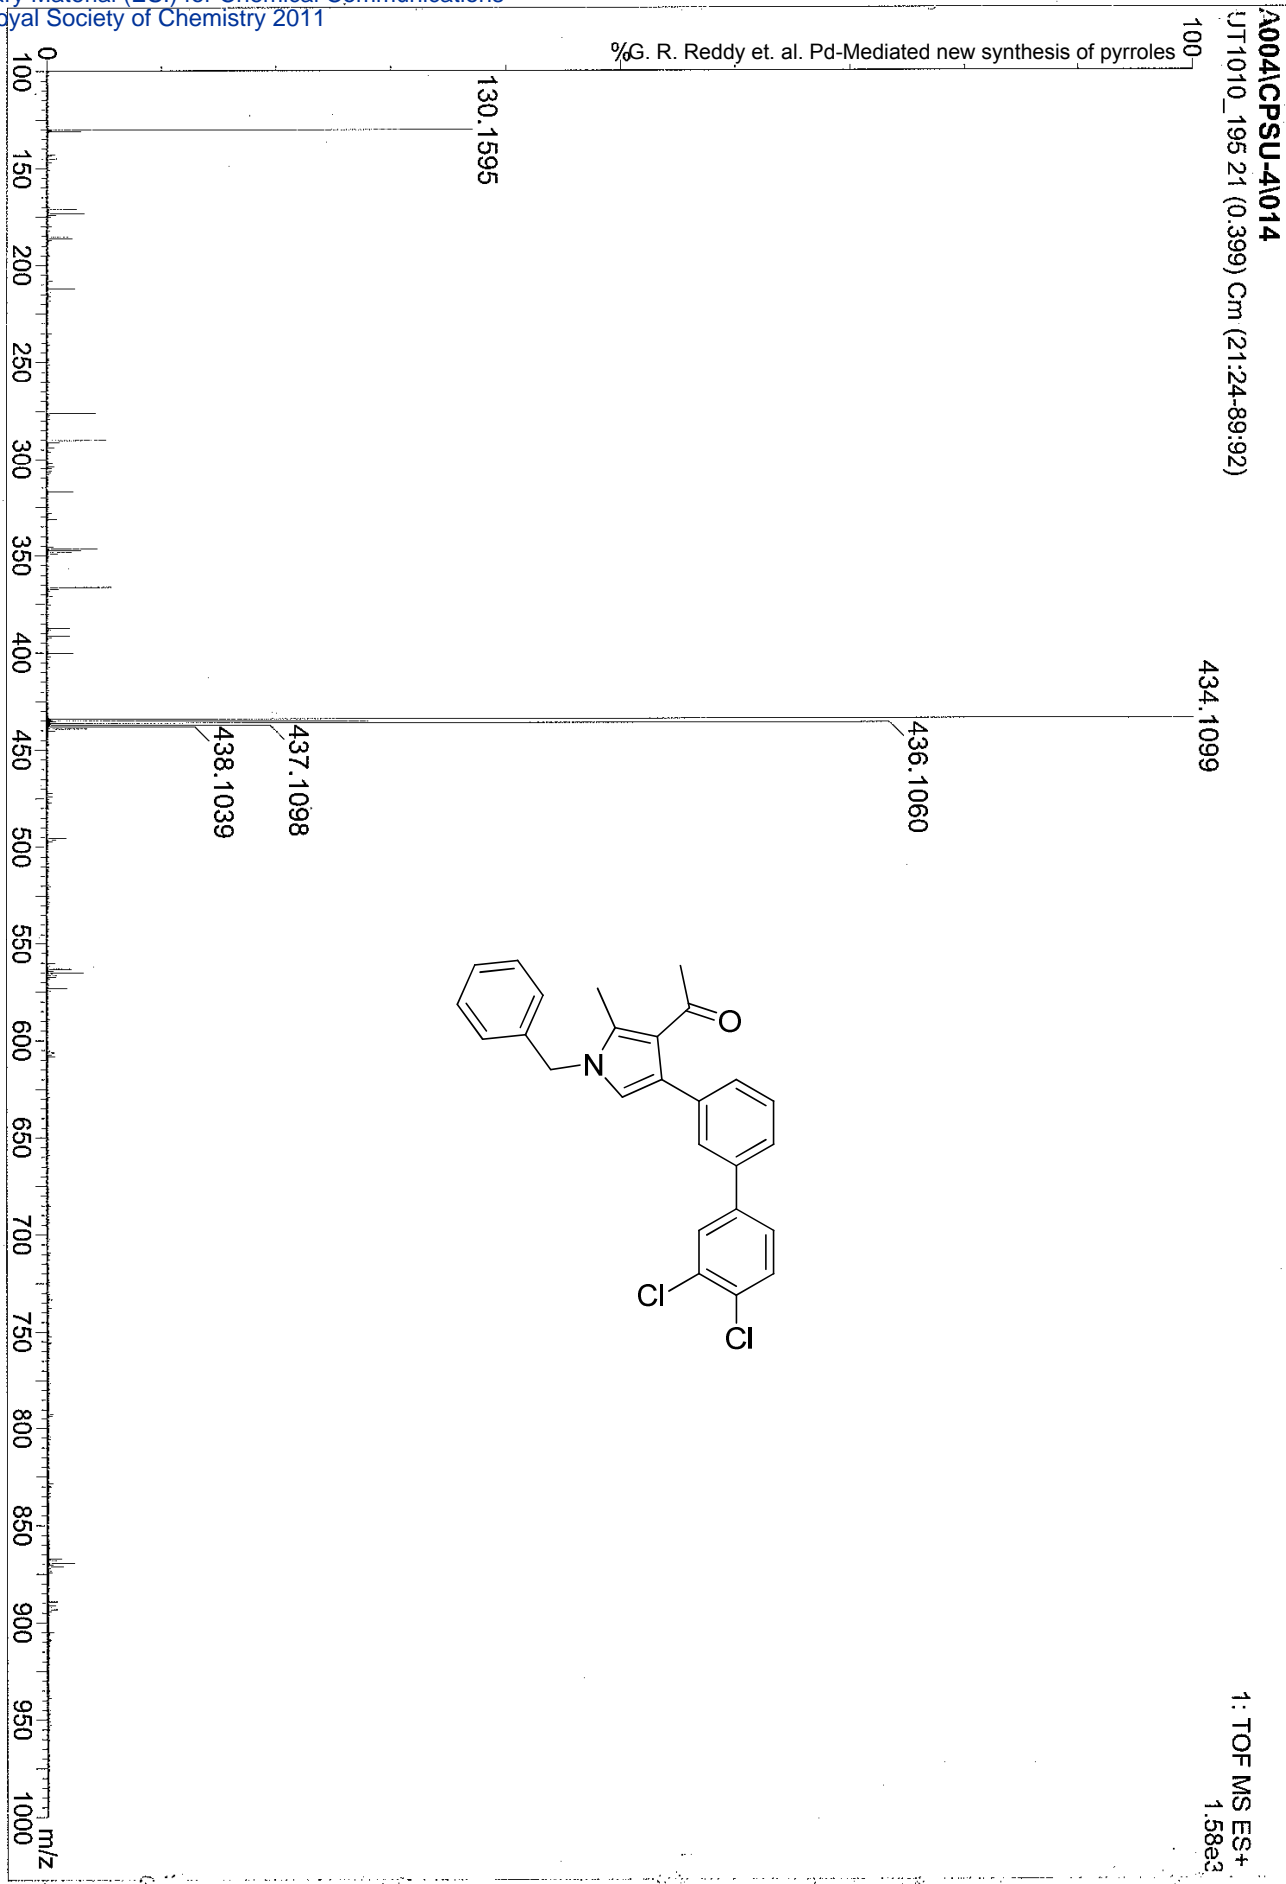



# Elemental Composition Report

## Single Mass Analysis

Tolerance = 5.0 PPM / DBE: min = -1.0, max = 80.0  
Element prediction: Off  
Number of isotope peaks used for i-FIT = 3

Monoisotopic Mass, Even Electron Ions  
250 formula(e) evaluated with 1 results within limits (up to 4 closest results for each mass)

Elements Used:

C: 0-45 H: 0-70 N: 0-3 O: 0-3 Cl: 0-2

AE04(CPSU-4)014

UT1010\_195 21 (0.399) Cm (21:24-89:92)

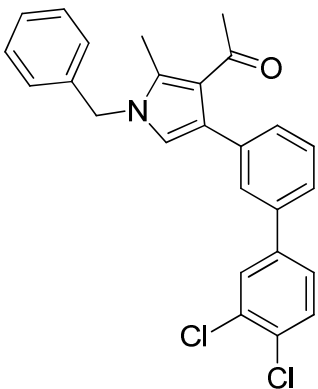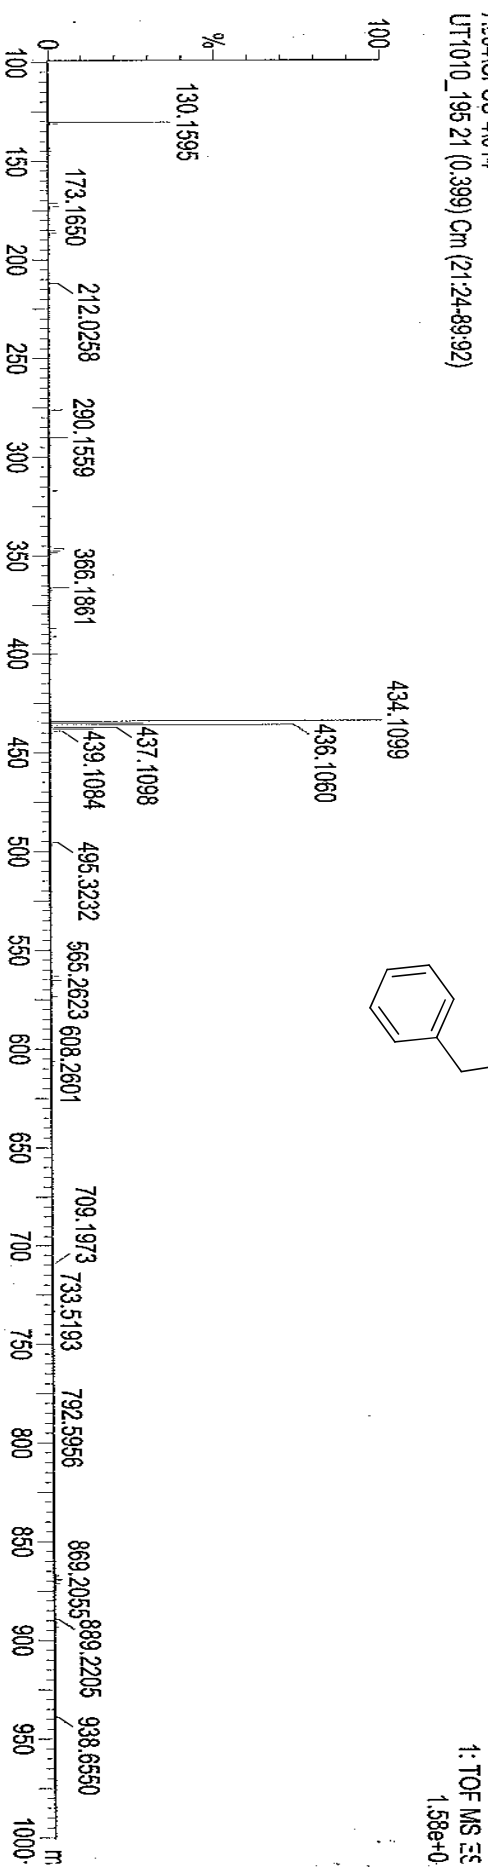

Minimum: -1.0  
Maximum: 80.0

| Mass     | Calc. Mass | MDa | PPM | DBE  | i-FIT | Formula         |
|----------|------------|-----|-----|------|-------|-----------------|
| 434.1099 | 434.1078   | 2.1 | 4.8 | 15.5 | 3.1   | C26 H22 N O Cl2 |

1: TOF MS ES  
1.58e+0

A004/CPSU-4/015 1H CDCl3  
NMR-400

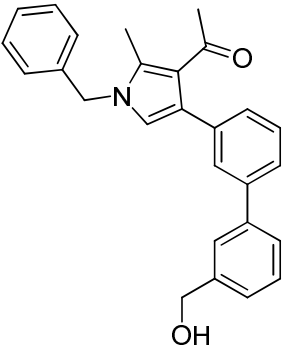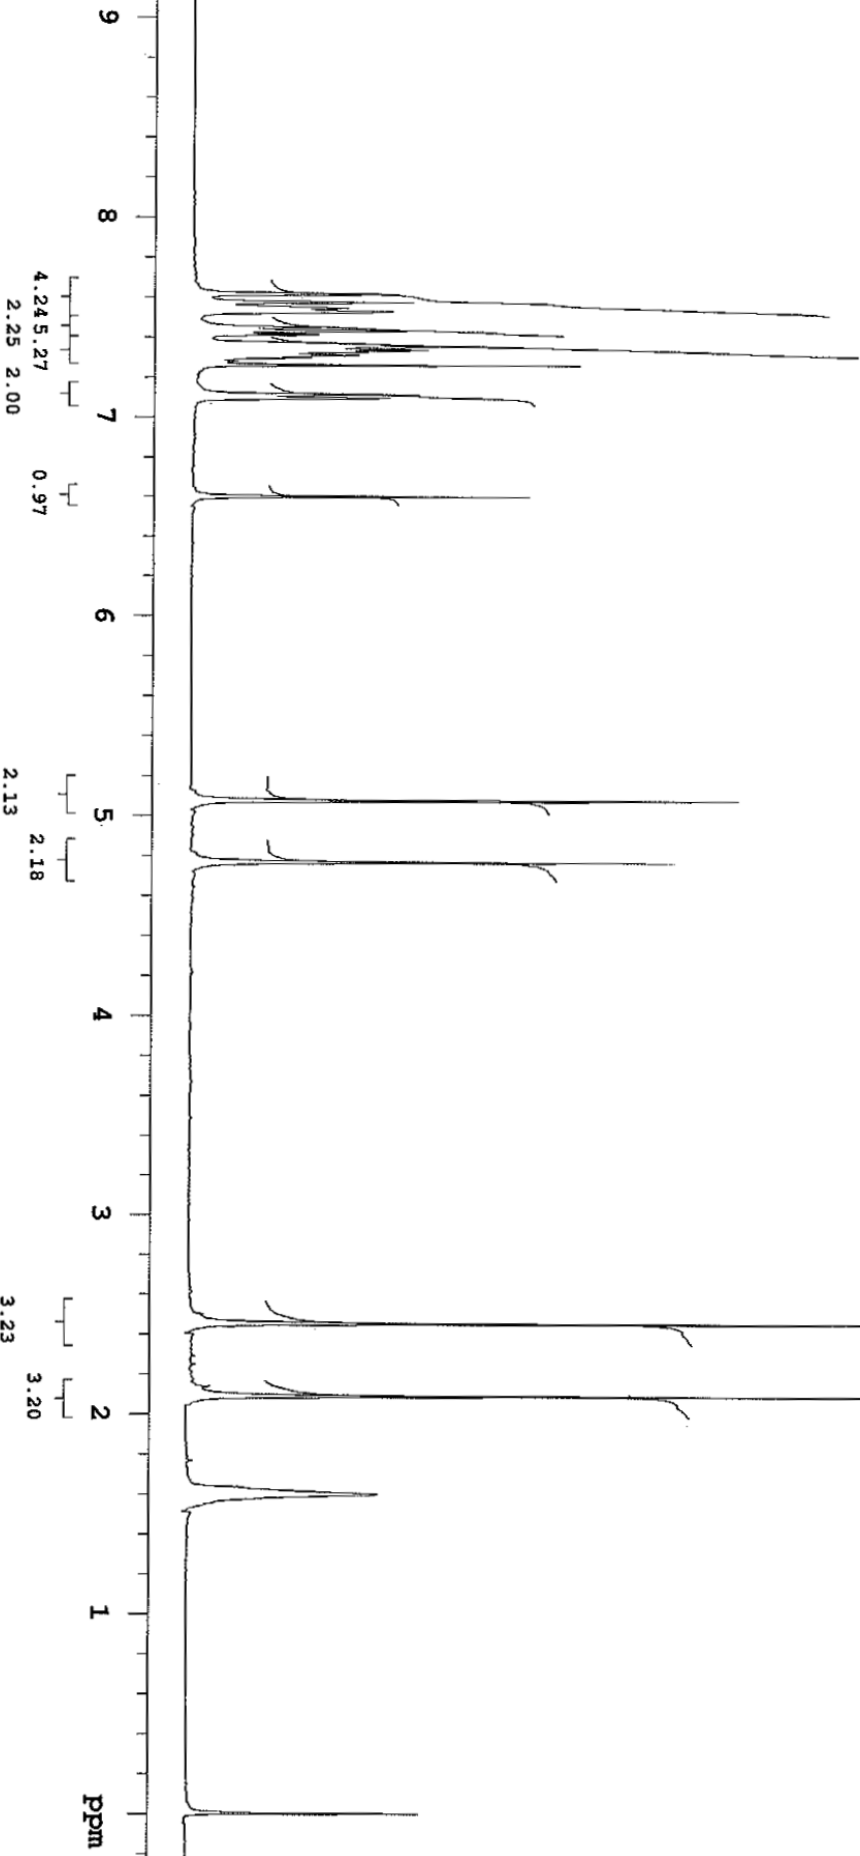

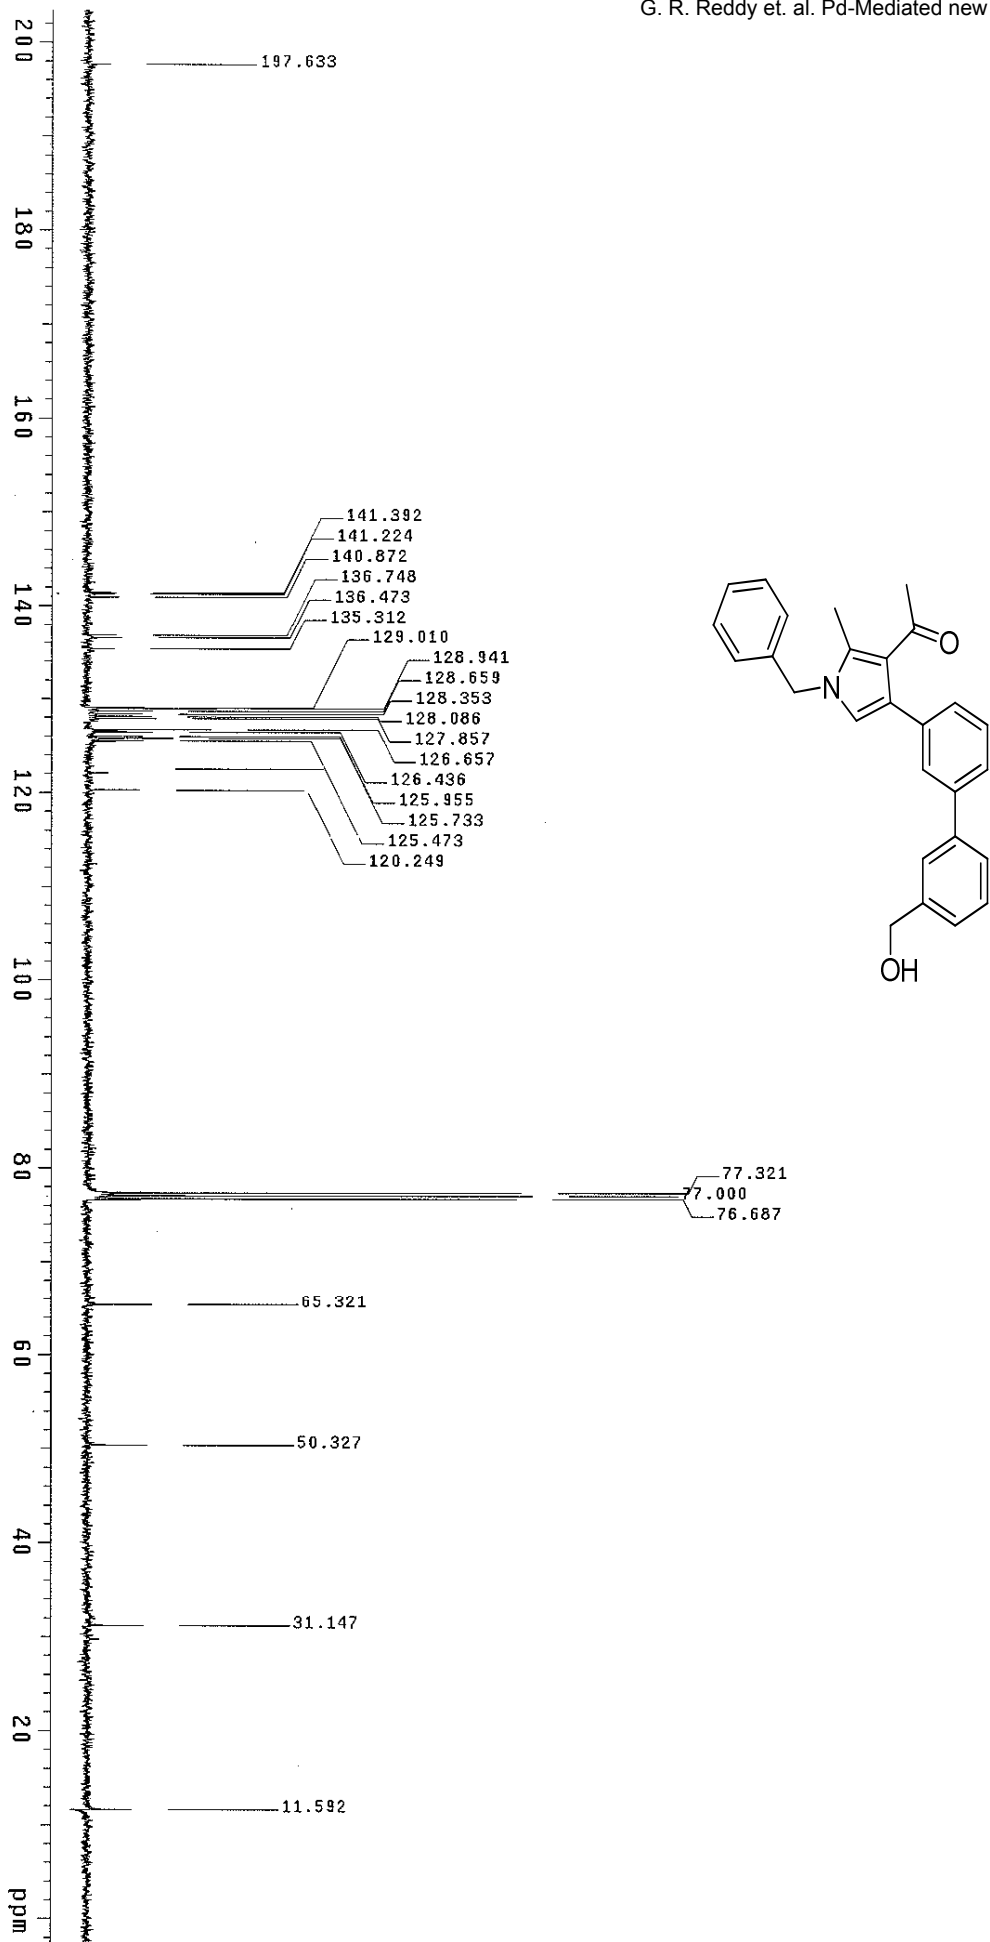

A004/CPSU-4/015 in CDCl<sub>3</sub>  
NMR-400

396.1958

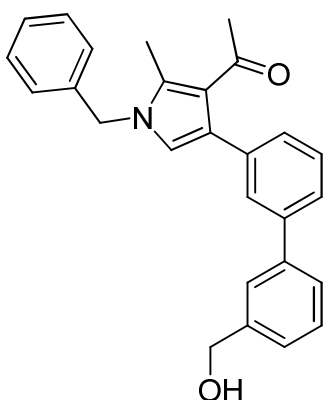

G. R. Reddy et. al. Pd-Mediated new synthesis of pyrroles

0 100 150 200 250 300 350 400 450 500 550 600 650 700 750 800 850 900 950 1000 m/z

397.2006

434.1524

525.3477

459.2036

813.3657

24.01101

## Single Mass Analysis

Efficient prediction: Off

Number of isotope peaks used for i-FLT = 3

## Monoisotopic Mass, Even Electron Ions

35 formula(e) evaluated with 1 results within limits (up to 4 best isotopic matches for each mass)

Elements Used:

C: 0.35 H: 0.45 N: 0.2 O: 0.2

3004#CPSU-4\015

UT140\_238 (0.145) Cm (8:16-78:88)

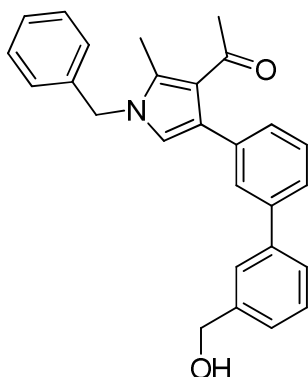

| Calculated (Found) for <chem>C27H26N2O2</chem> |
|------------------------------------------------|------------------------------------------------|------------------------------------------------|------------------------------------------------|------------------------------------------------|------------------------------------------------|------------------------------------------------|
| Maximum:                                       |                                                |                                                |                                                |                                                |                                                |                                                |
| Minimum:                                       |                                                |                                                |                                                |                                                |                                                |                                                |
| Mass                                           | Calc. Mass                                     | mDa                                            | PPM                                            | DBE                                            | i-FIT                                          | Formula                                        |
| 386.1958                                       | 396.1964                                       | -0.6                                           | -1.5                                           | 15.5                                           | 1.5                                            | C27 H26 N 2                                    |

A004-CPSPV-4-016 1n CDCL3  
NMR-400

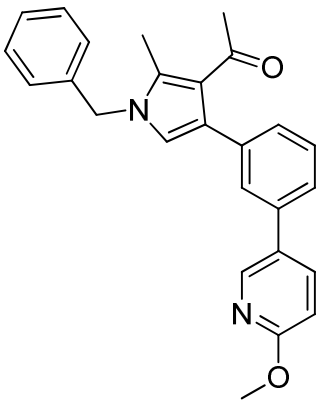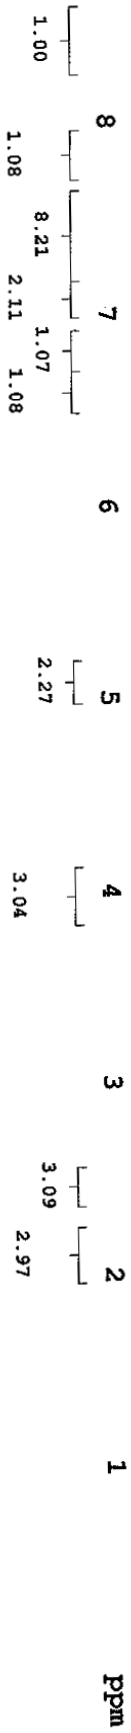

A004/CPSU-4/016 in CDCl<sub>3</sub>  
NMR-400

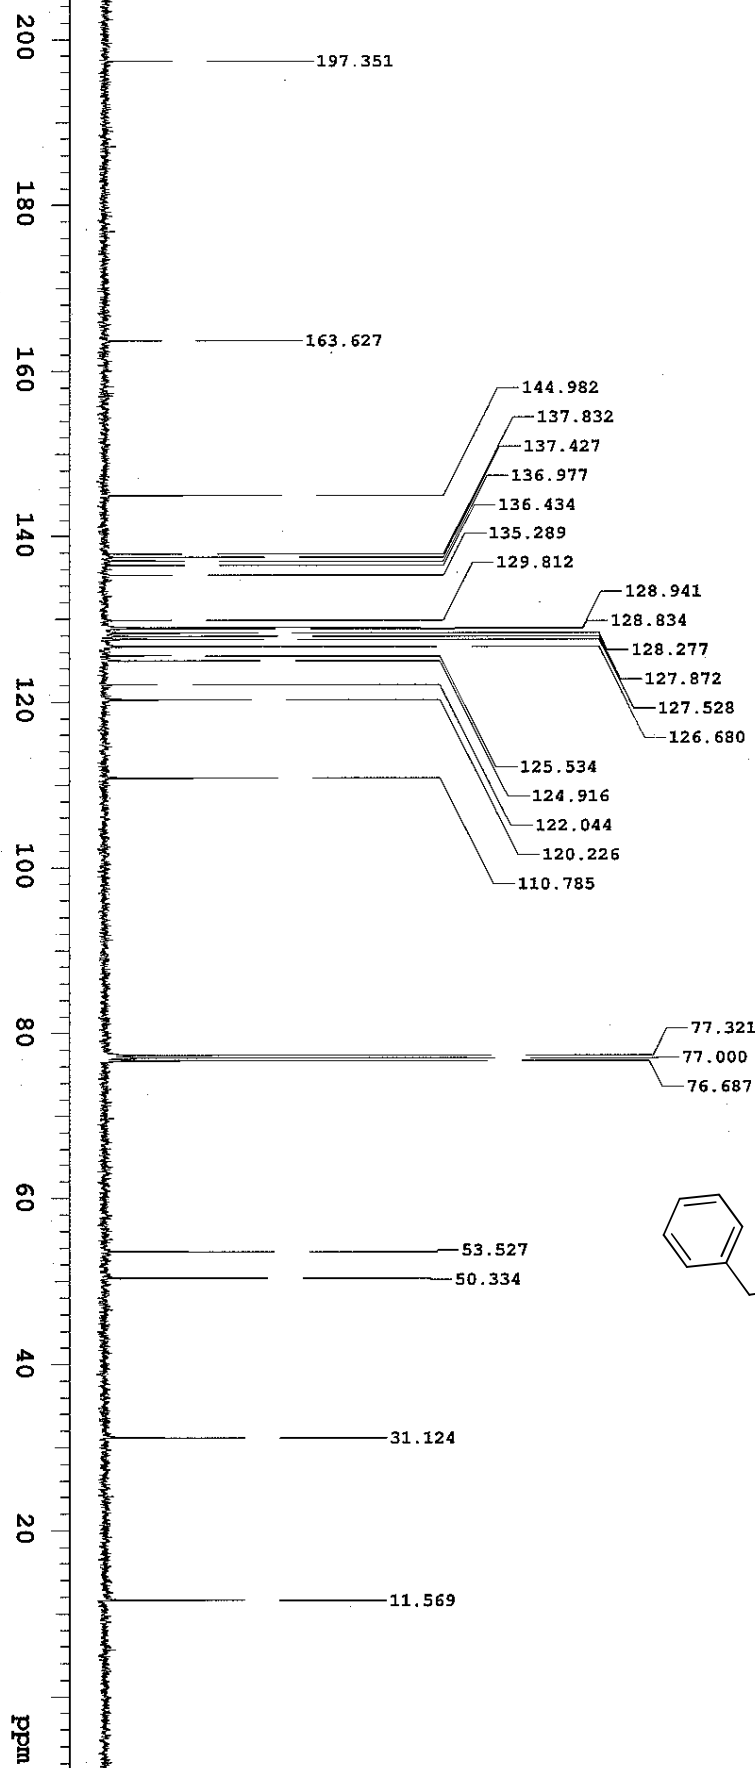

A004/CPSU-4/016

SI11110\_24 18 (0.338) Cm (17:22-86:95)

397.1917

1: TOF MS  
5.65

398.1946

526.3427

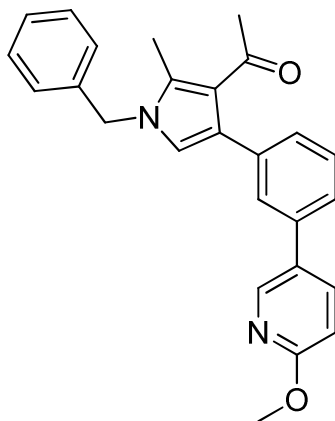

100  
0  
100  
150  
200  
250  
300  
350  
400  
450  
500  
550  
600  
650  
700  
750  
800  
850  
900  
950  
1000  
m/z



## Elemental Composition Report

### Single Mass Analysis

Tolerance = 5.0 PPM / DBE: min = -1.0, max = 80.0

Element prediction: Off

Number of isotope peaks used for i-FIT = 3

Monoisotopic Mass, Even Electron Ions

36 formula(e) evaluated with 1 results within limits (up to 4 best isotopic matches for each mass)

Elements Used:

C: 0-35 H: 0-45 N: 0-2 O: 0-2

A004CPSU-41016

UT1110\_24 18 (0.338) Cm (17:22-86:95)

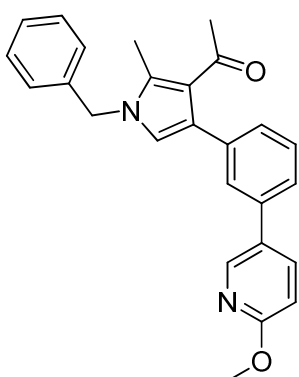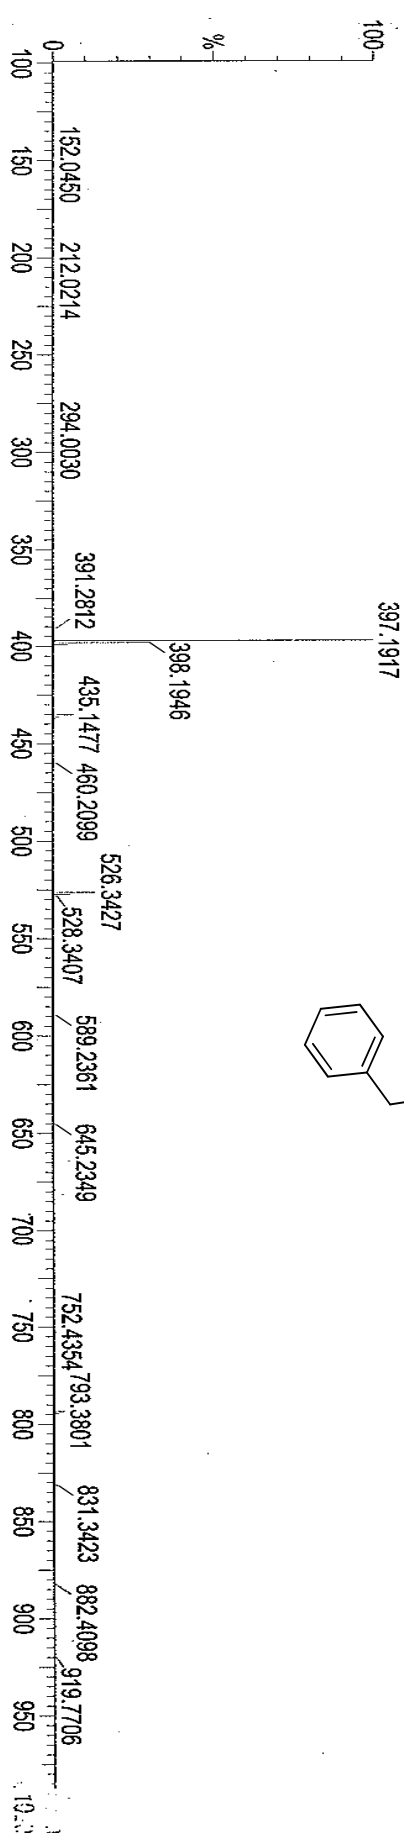

|          |            |     |     |      |               |
|----------|------------|-----|-----|------|---------------|
| Minimum: |            |     |     |      |               |
| Maximum: |            |     |     |      |               |
| Mass     | Calc. Mass | mDa | PPM | DBE  | i-FIT         |
| 397.1917 | 397.1916   | 0.1 | 0.3 | 15.5 | 1.1           |
|          |            |     |     |      | Formula       |
|          |            |     |     |      | C26 H25 N2 O2 |

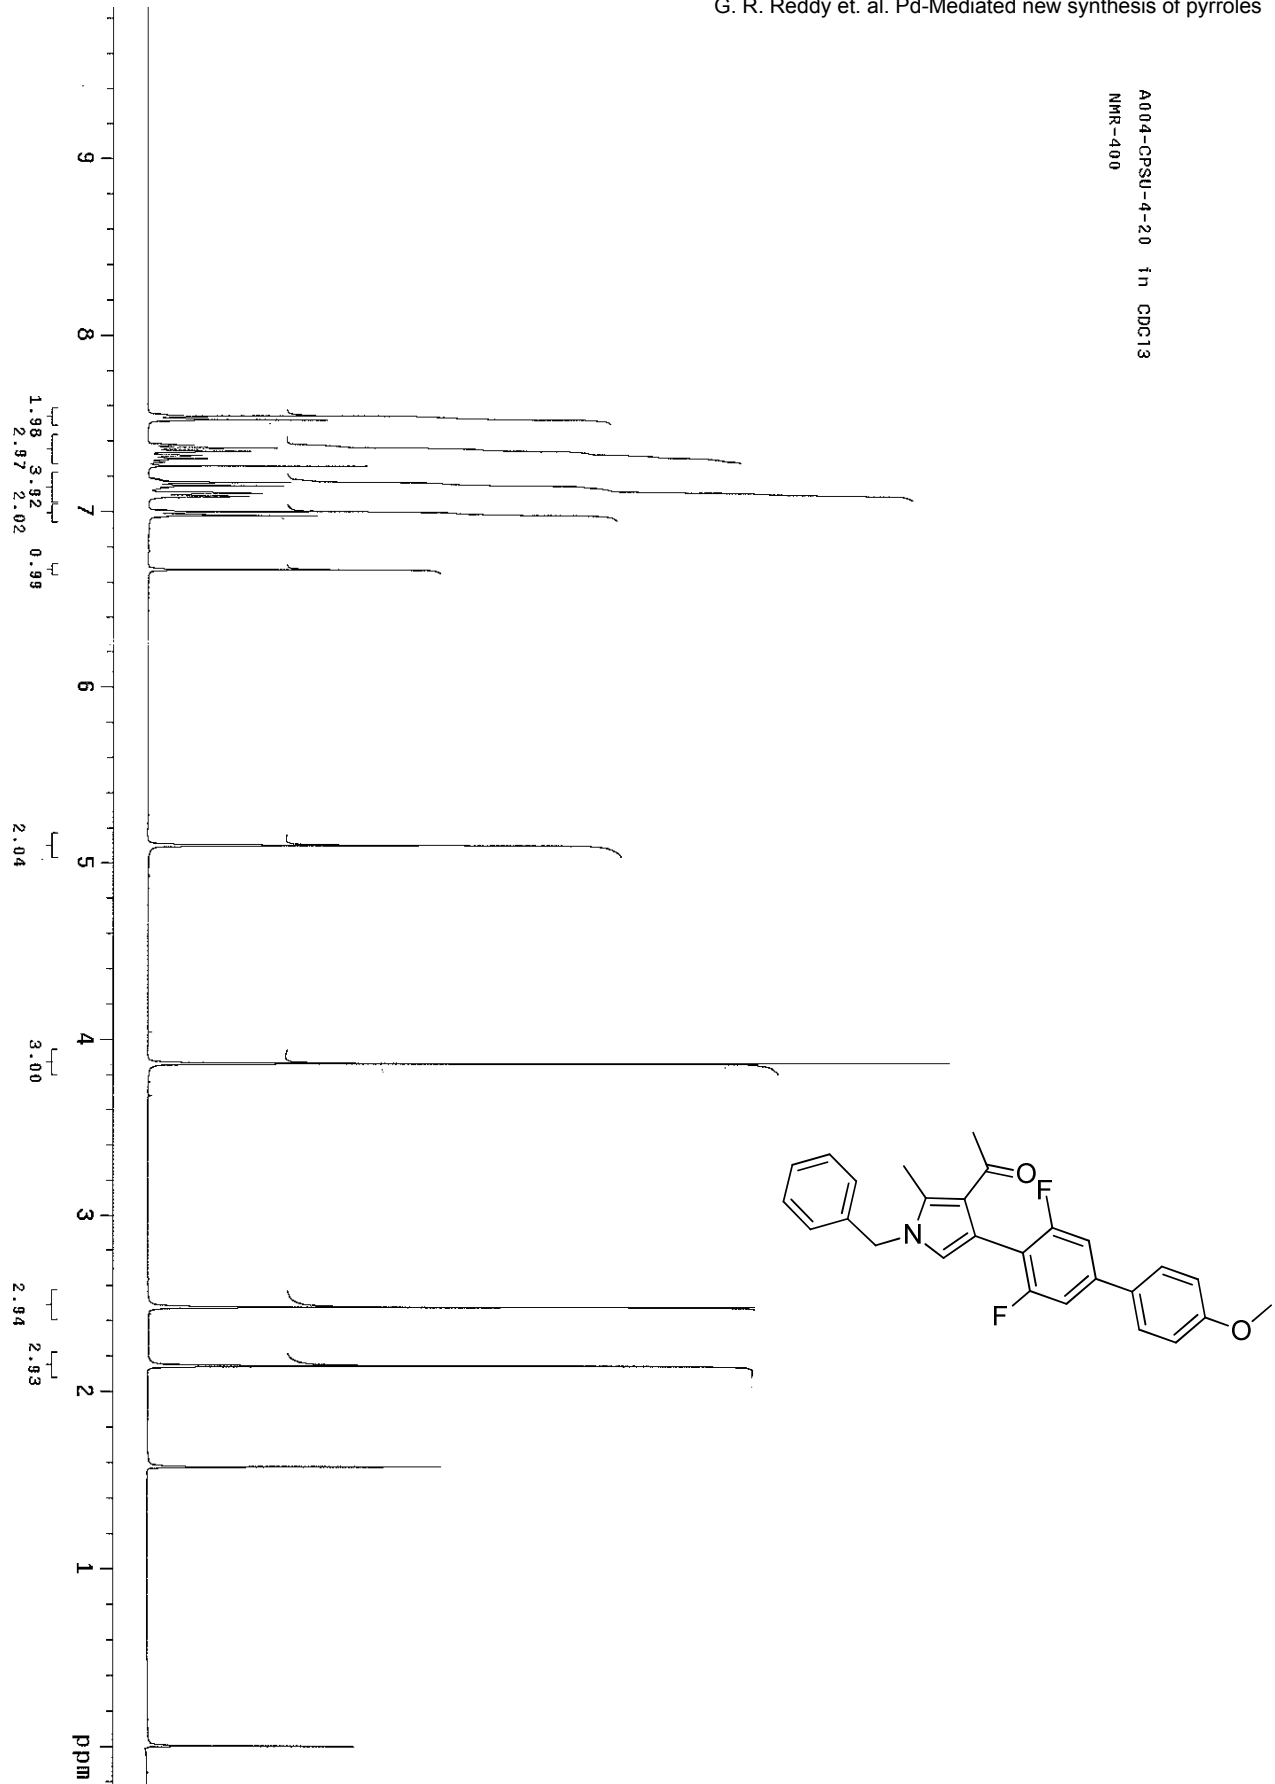

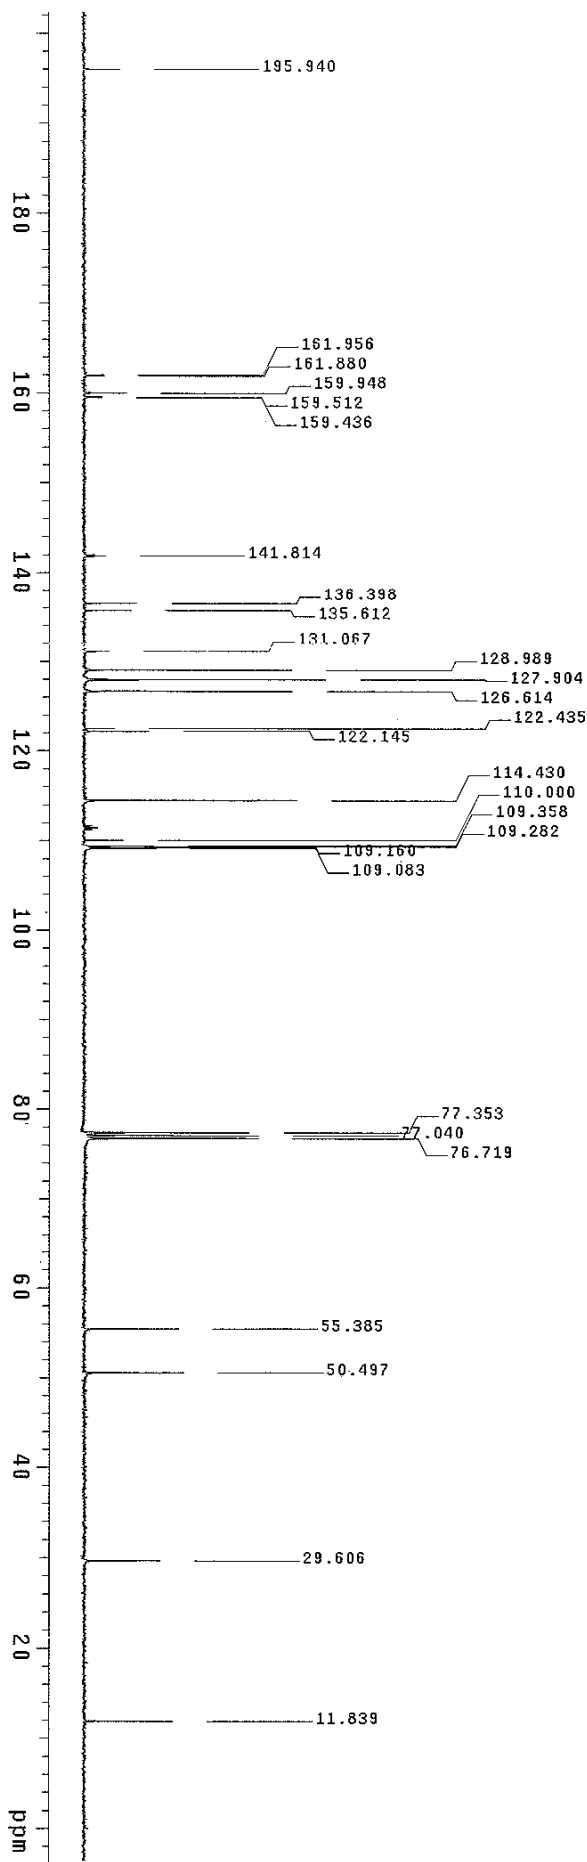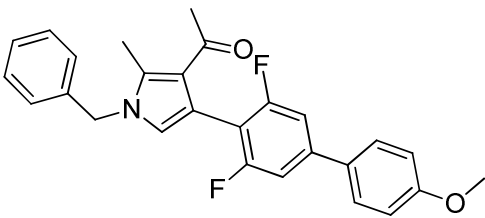

A004/CPSU-4/020 in CDCl3  
NMR-400

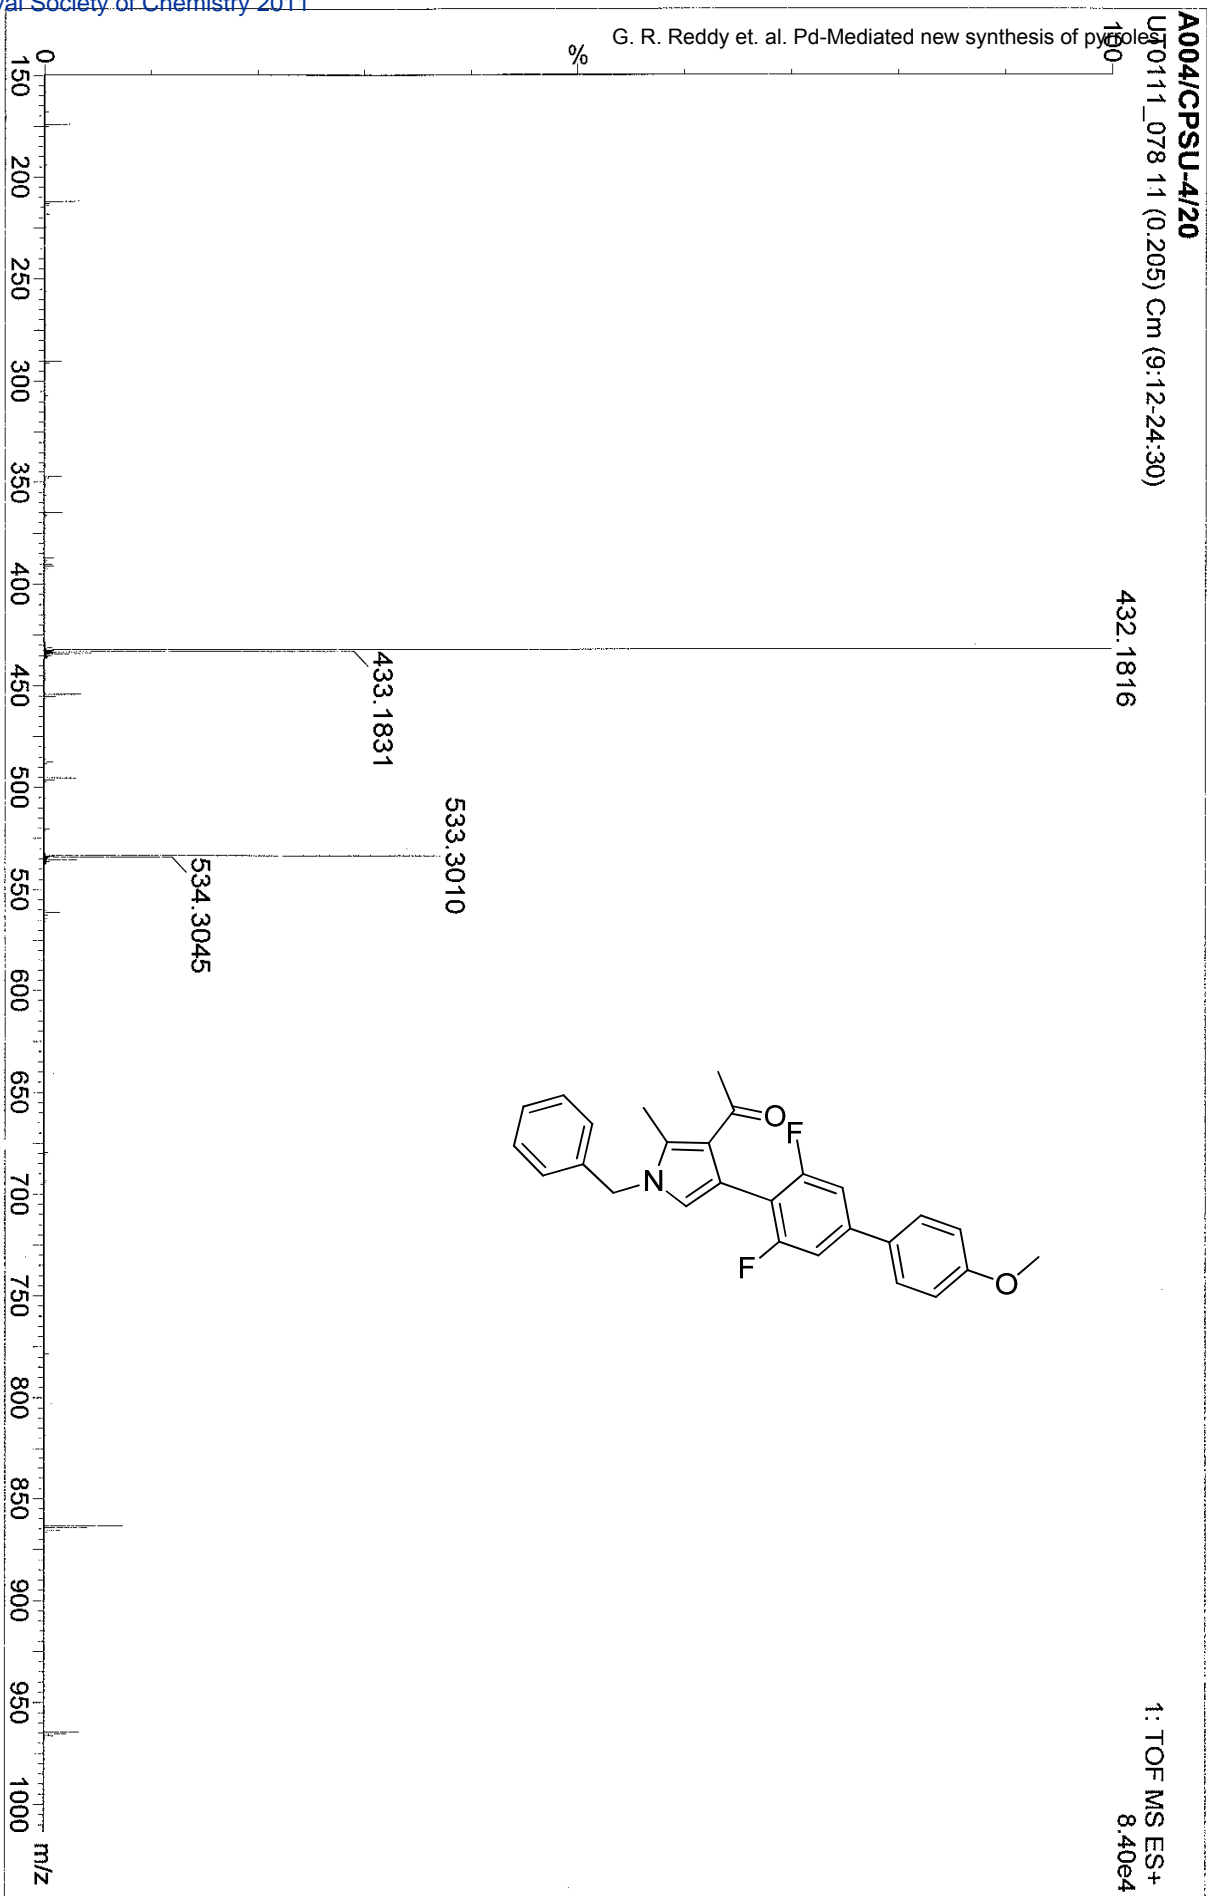

## Elemental Composition Report

### Single Mass Analysis

Tolerance = 10.0 PPM / DBE: min = -1.0, max = 80.0

Element prediction: Off

Number of isotope peaks used for I-FIT = 4

Monoisotopic Mass, Even Electron Ions

149 formula(e) evaluated with 2 results within limits (up to 15 closest results for each mass)

Elements Used:

C: 0-30 H: 0-30 N: 0-3 O: 0-5 F: 0-2

A004/CPSU-4/20

UT0111\_078 11 (0.205) Cm (9:12-24:30)

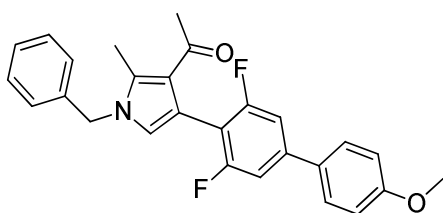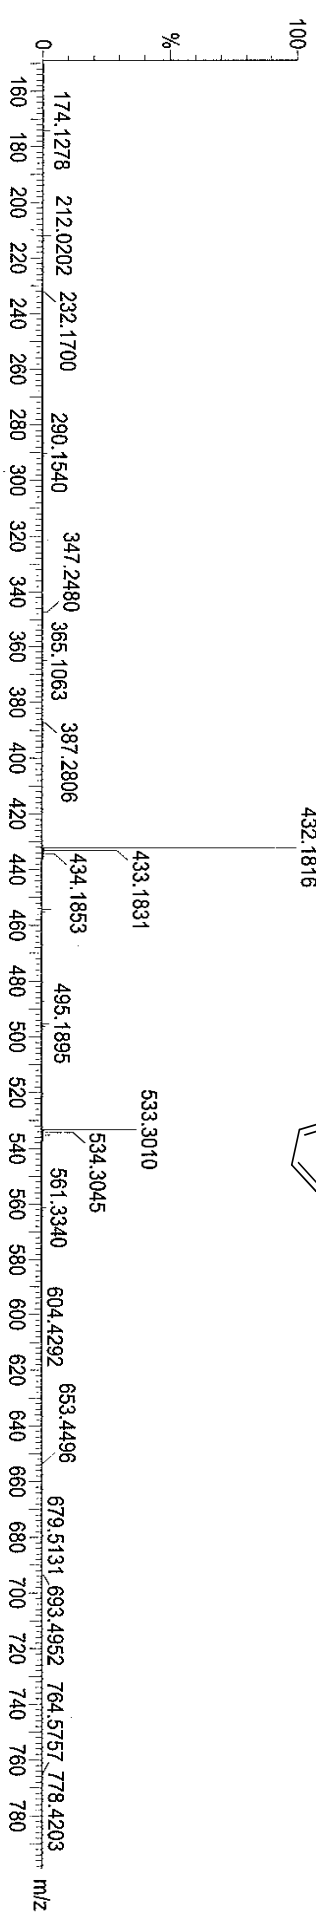

TOF MS ES+  
8.40e+004

Minimum: 5.0  
Maximum: 10.0  
-1.0  
80.0

| Mass     | Calc. Mass | MDa | PPM | DBE  | I-FIT | Formula         |
|----------|------------|-----|-----|------|-------|-----------------|
| 432.1816 | 432.1775   | 4.1 | 9.5 | 15.5 | 77.7  | C27 H24 N O2 F2 |

A004-CPSUD-22 in CDCl3  
NMR-400

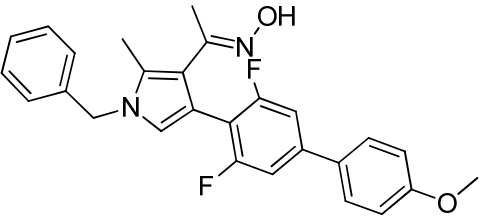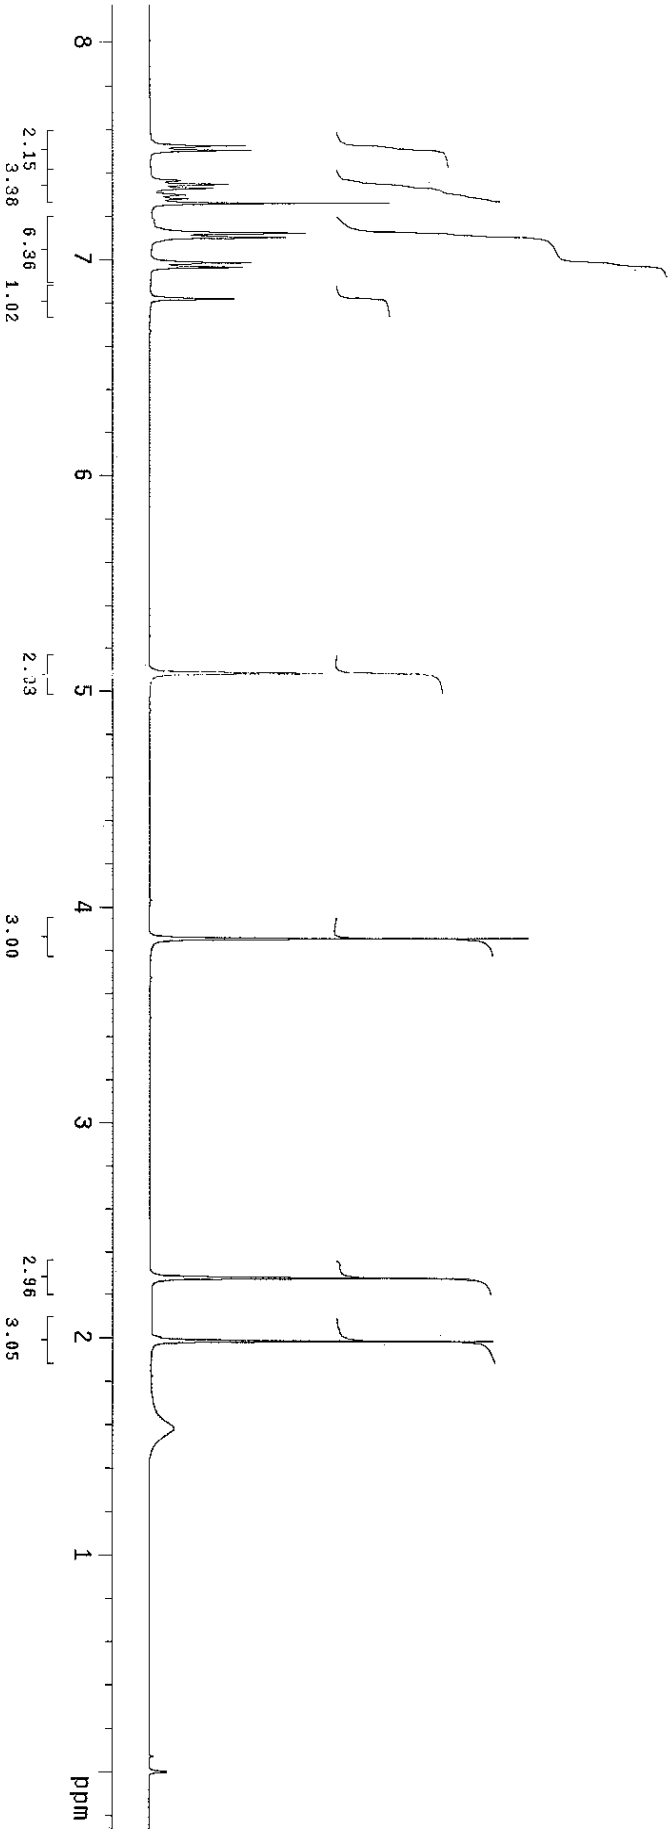

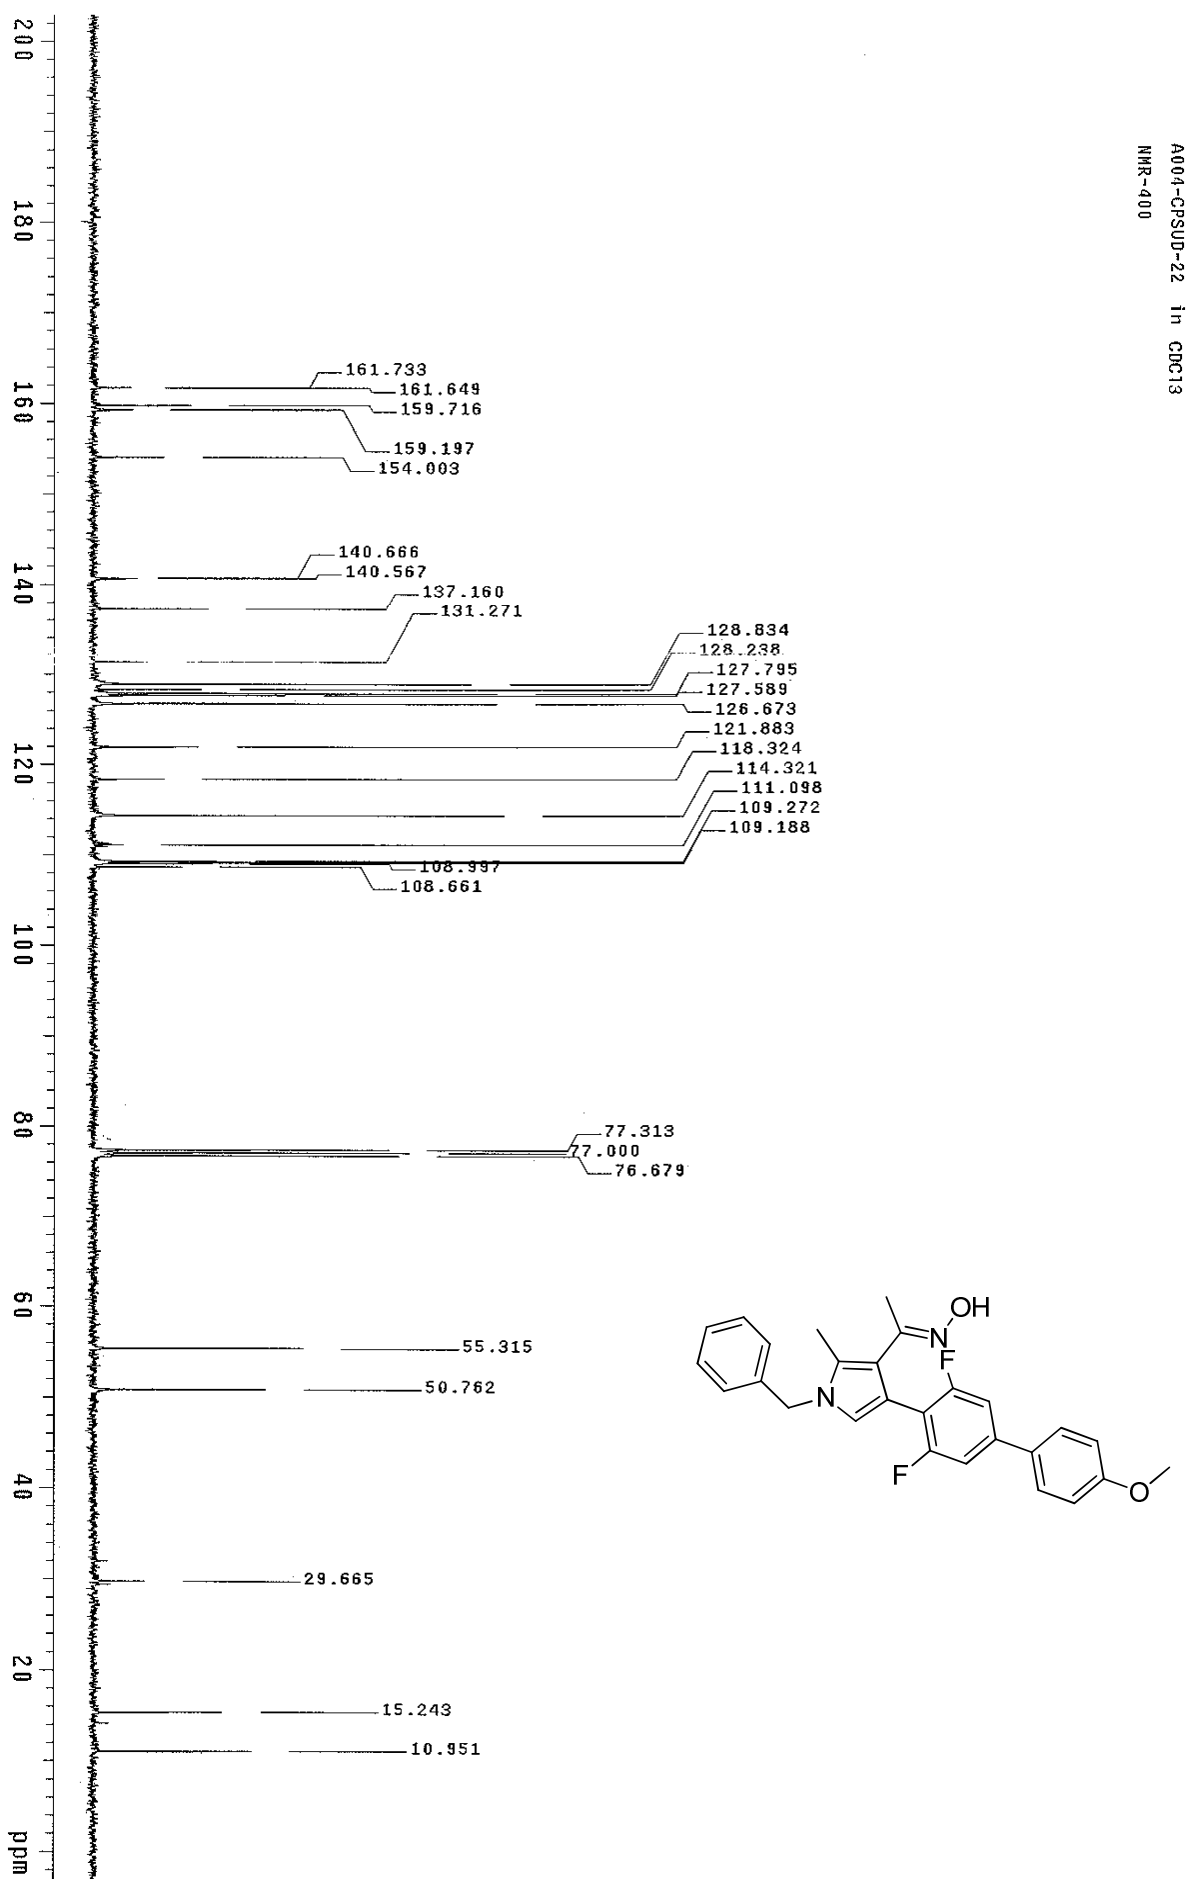

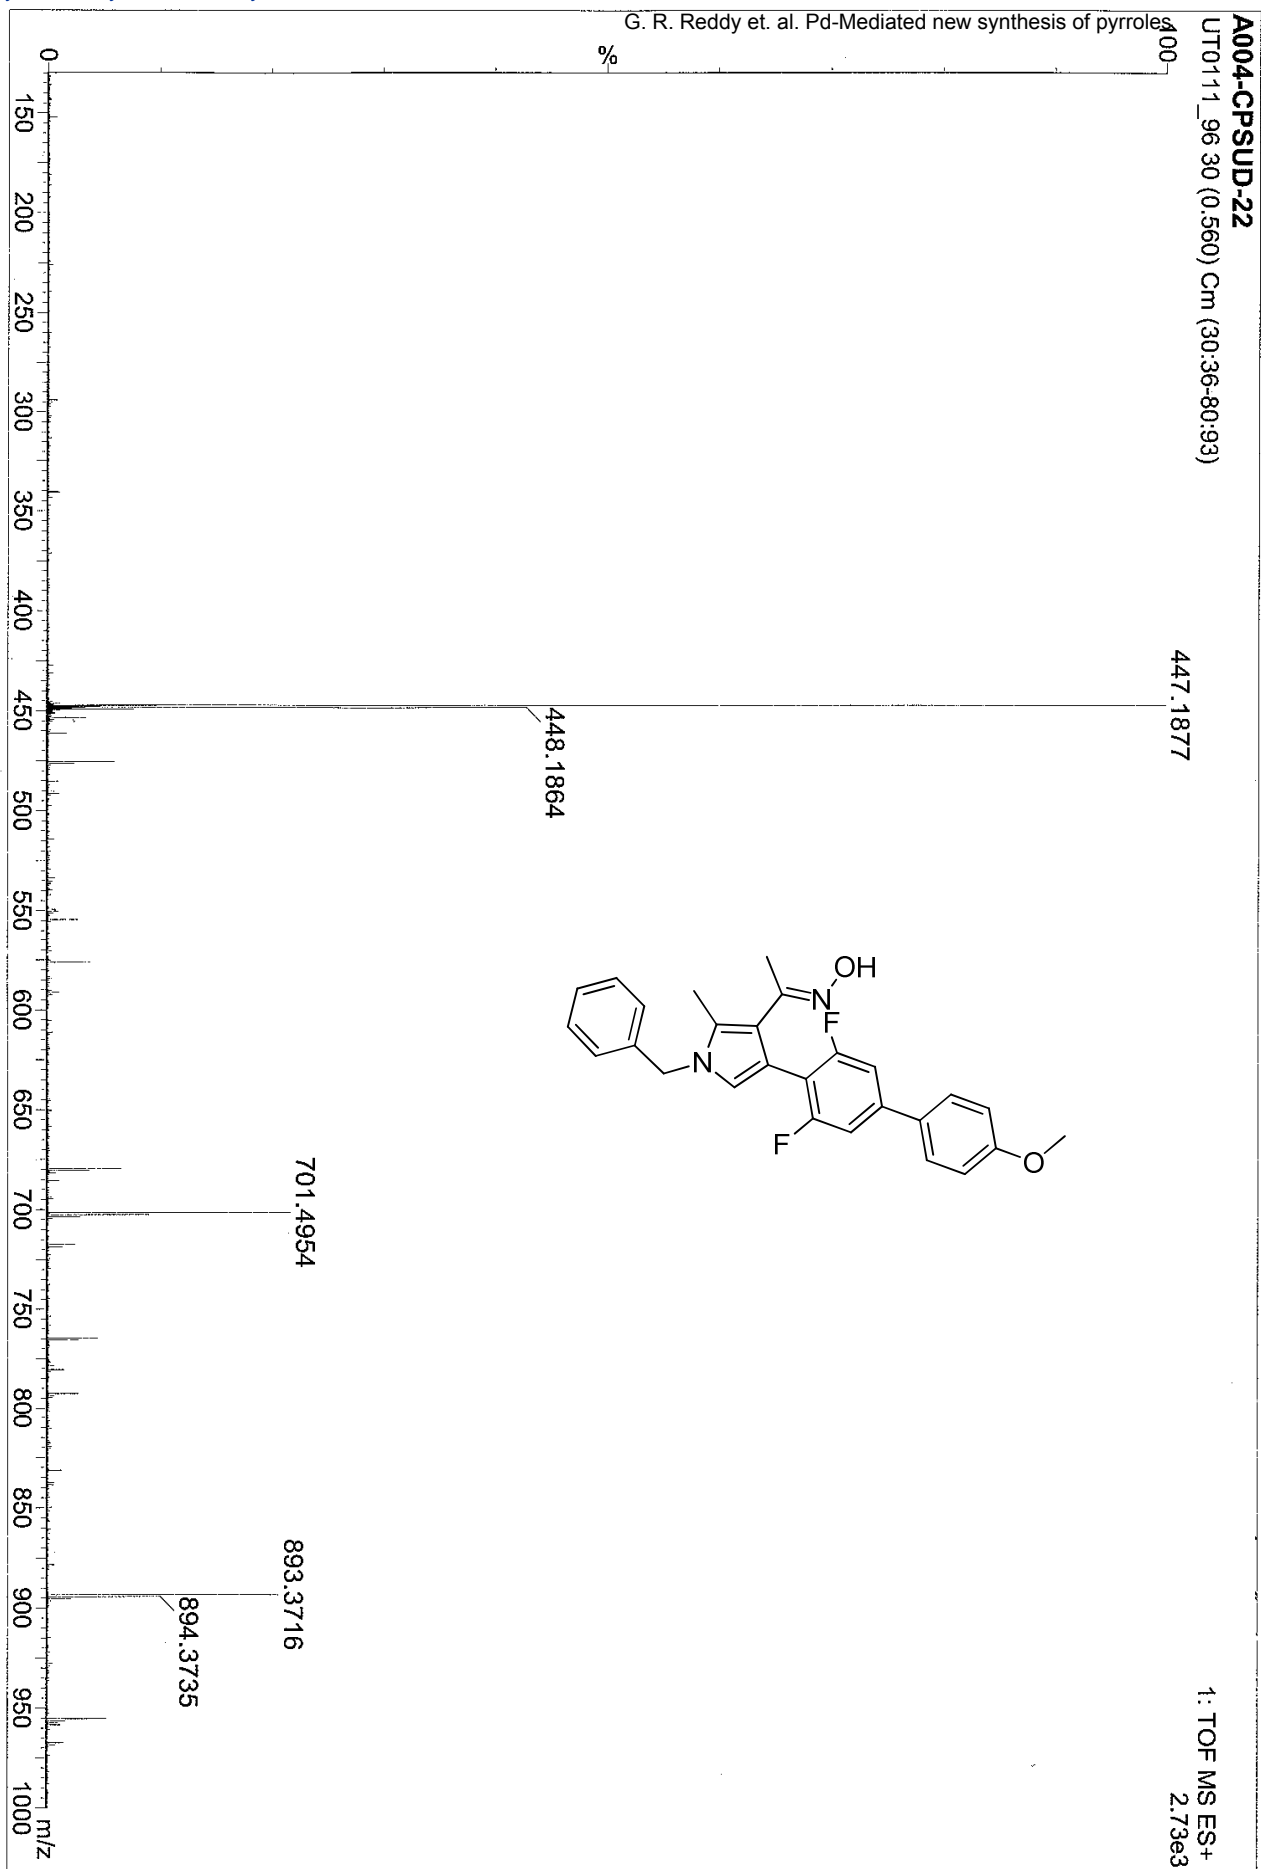



Tolerance = 5.0 PPM / DBE: min = -1.0, max = 80.0

Element prediction: Off

Number of isotope peaks used for i-FIT = 3

### Monoisotopic Mass, Even Electron Ions

<sup>237</sup> formula(e) evaluated with 2 results within limits (up to 4 best isotopic matches for each mass)

### Elements Used:

6. 0-45 H: 0-55 N: 0-4 O: 0-4 F: 1-2

~~2~~004-CPsUD-22

DT0111\_96 30 (0.560) Cm (30:36-80:93)

1: TOF MS ES+  
2.74e+003

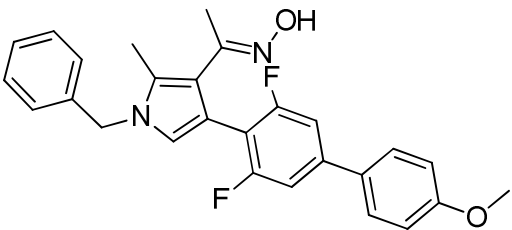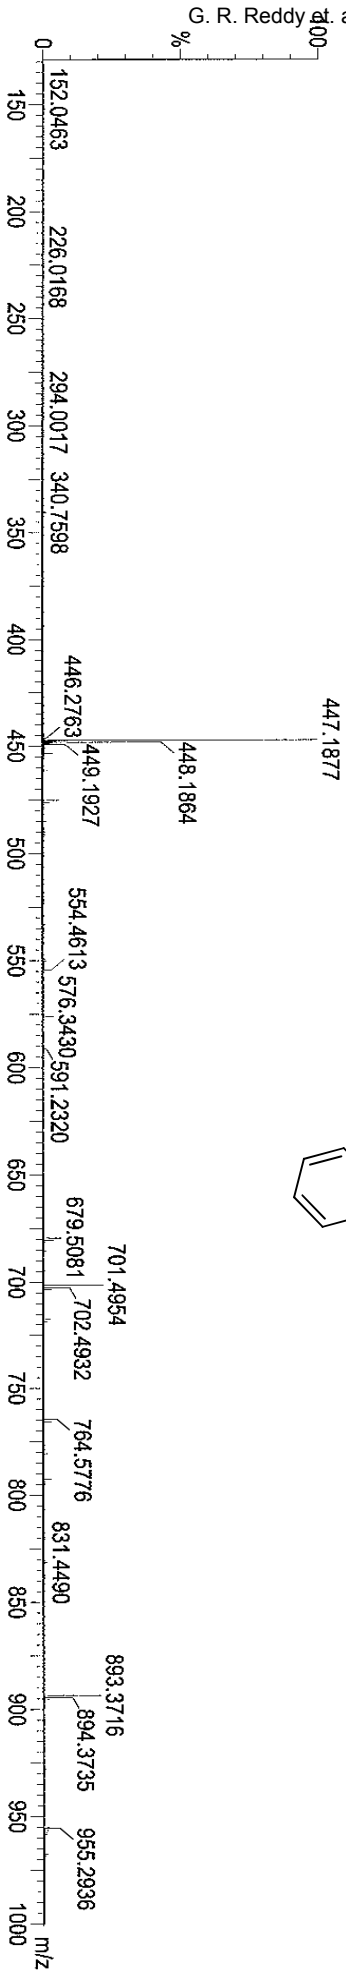

|          |            |      |      |      |       |                  |  |  |  |
|----------|------------|------|------|------|-------|------------------|--|--|--|
| Minimum: |            |      |      | -1.0 |       |                  |  |  |  |
| Maximum: |            |      | 5.0  | 5.0  | 80.0  |                  |  |  |  |
| Mass     | Calc. Mass | mDa  | PPM  | DBE  | i-FIT | Formula          |  |  |  |
| 447.1877 | 447.1884   | -0.7 | -1.6 | 15.5 | 44.6  | C27 H25 N2 O2 F2 |  |  |  |

A004/CPSUD/23 in CDCl3  
NMR-400

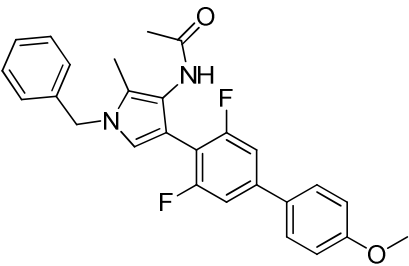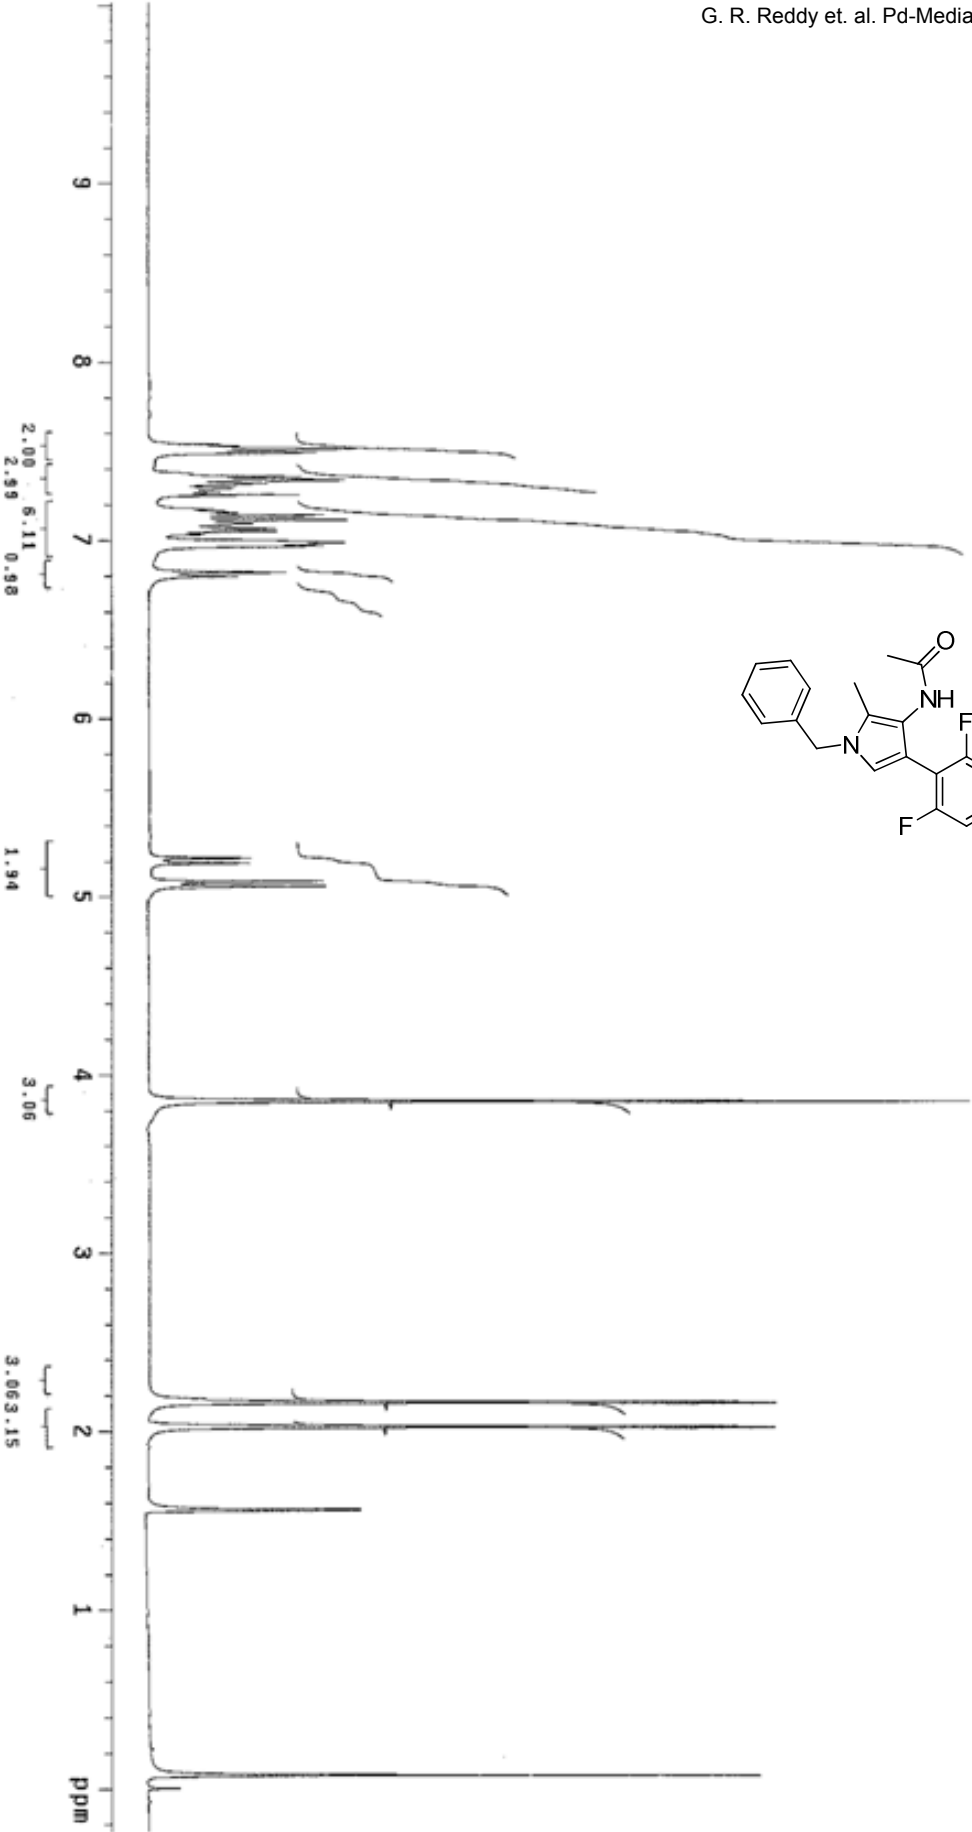

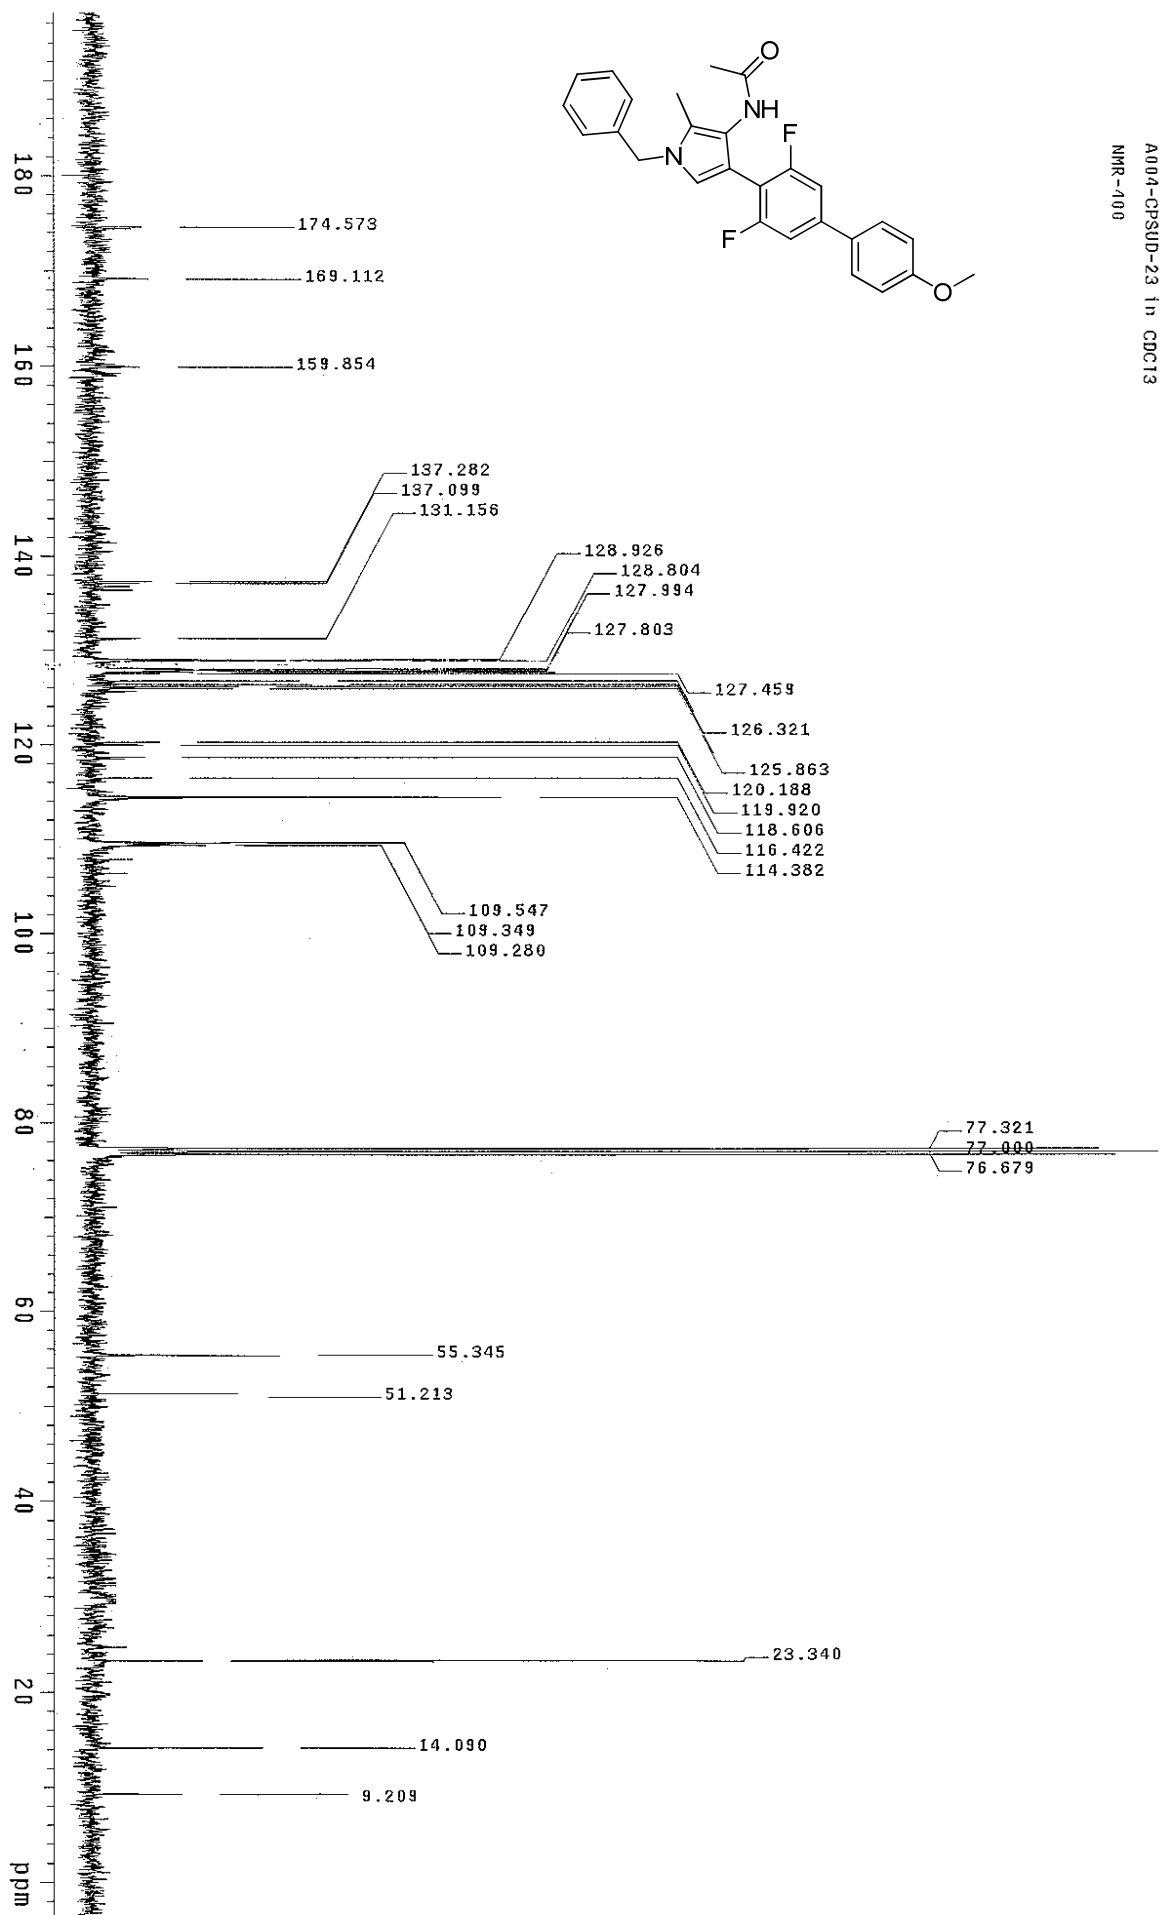

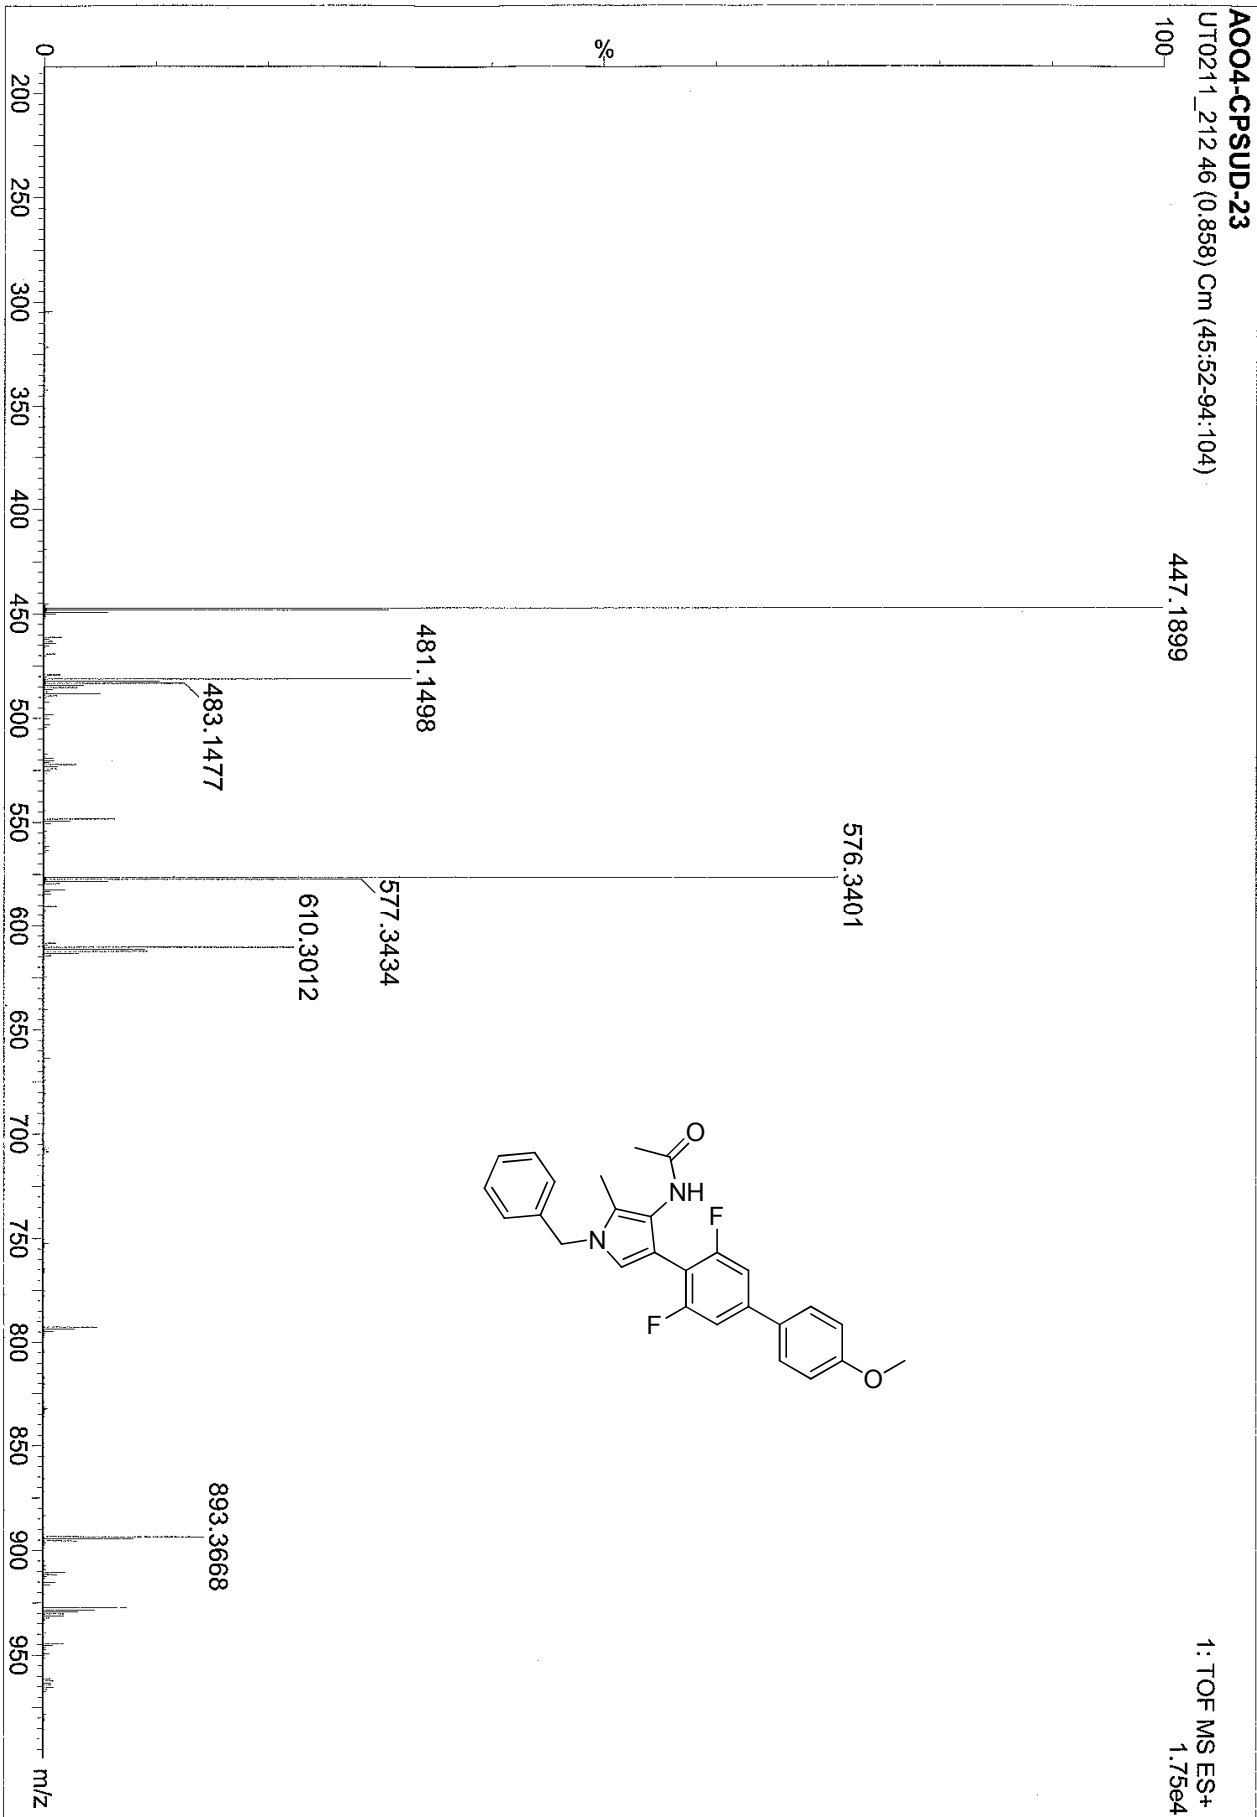

# Elemental Composition Report

## Single Mass Analysis

Tolerance = 5.0 PPM / DBE: min = -1.0, max = 80.0

Element prediction: Off

Number of isotope peaks used for i-FIT = 3

Monoisotopic Mass, Even Electron Ions

295.5 Formula(e) evaluated with 1 results within limits (up to 4 best isotopic matches for each mass)

Elements Used:

C: 11-35 H: 0-45 N: 0-4 O: 0-4 F: 0-2

AOB4-CPsUD-23

UT0211\_212.46 (0.858) Cm (45:52-94:104)

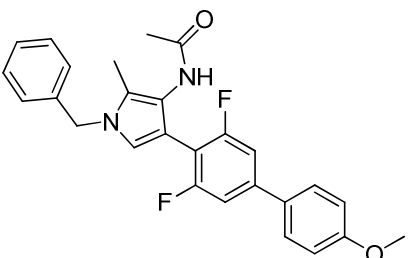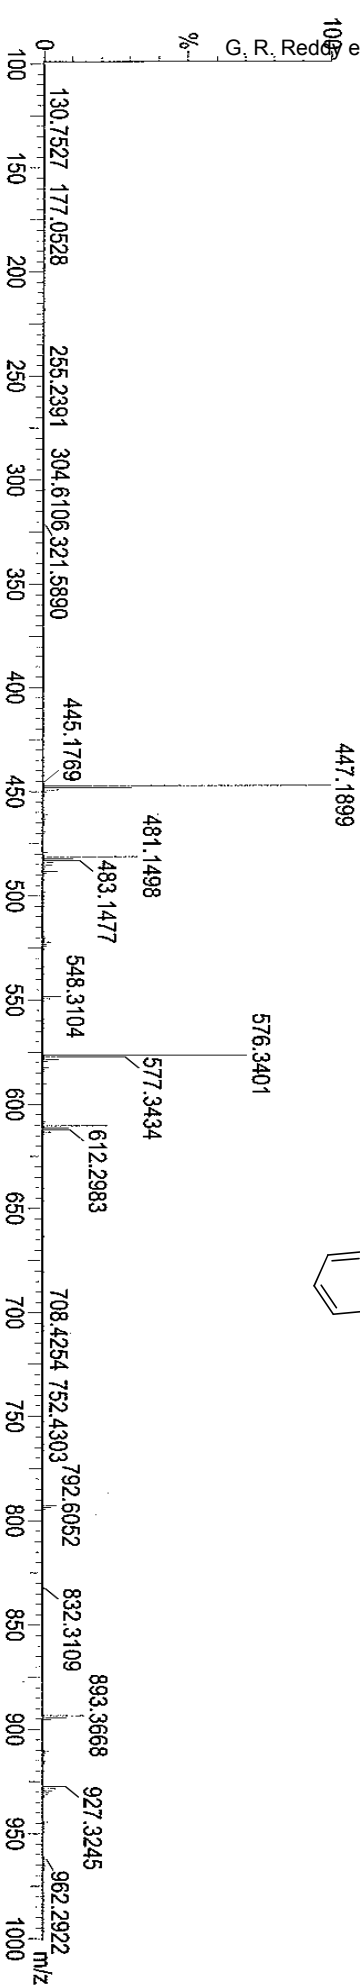

Minimum: 80.00

Maximum: 100.00

5.0

5.0

80.0

-1.0

Mass RA Calc. Mass mDa PPM DBE i-FIT Formula

447.1899 100.00 447.1884 1.5 3.4 15.5 7.0 C27 H25 N2 O2 F2

A006/CPHR-3/001 in CDCl3  
NMR-400

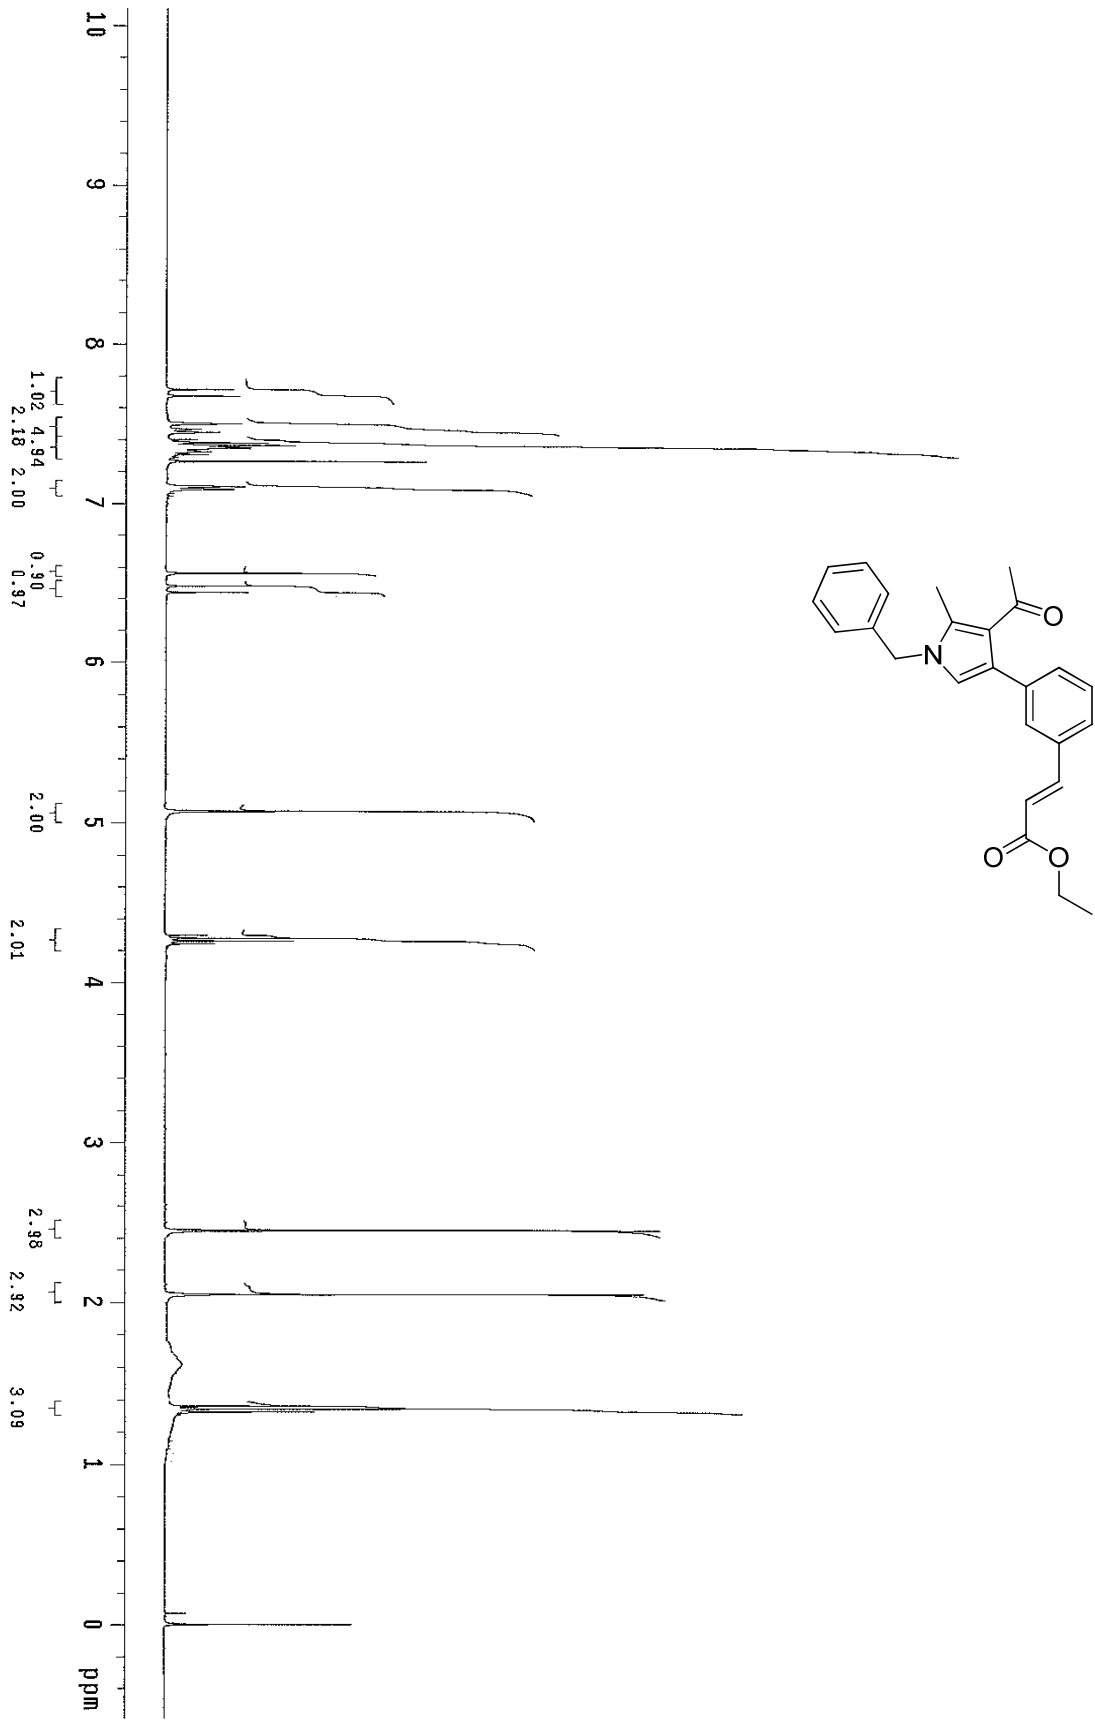

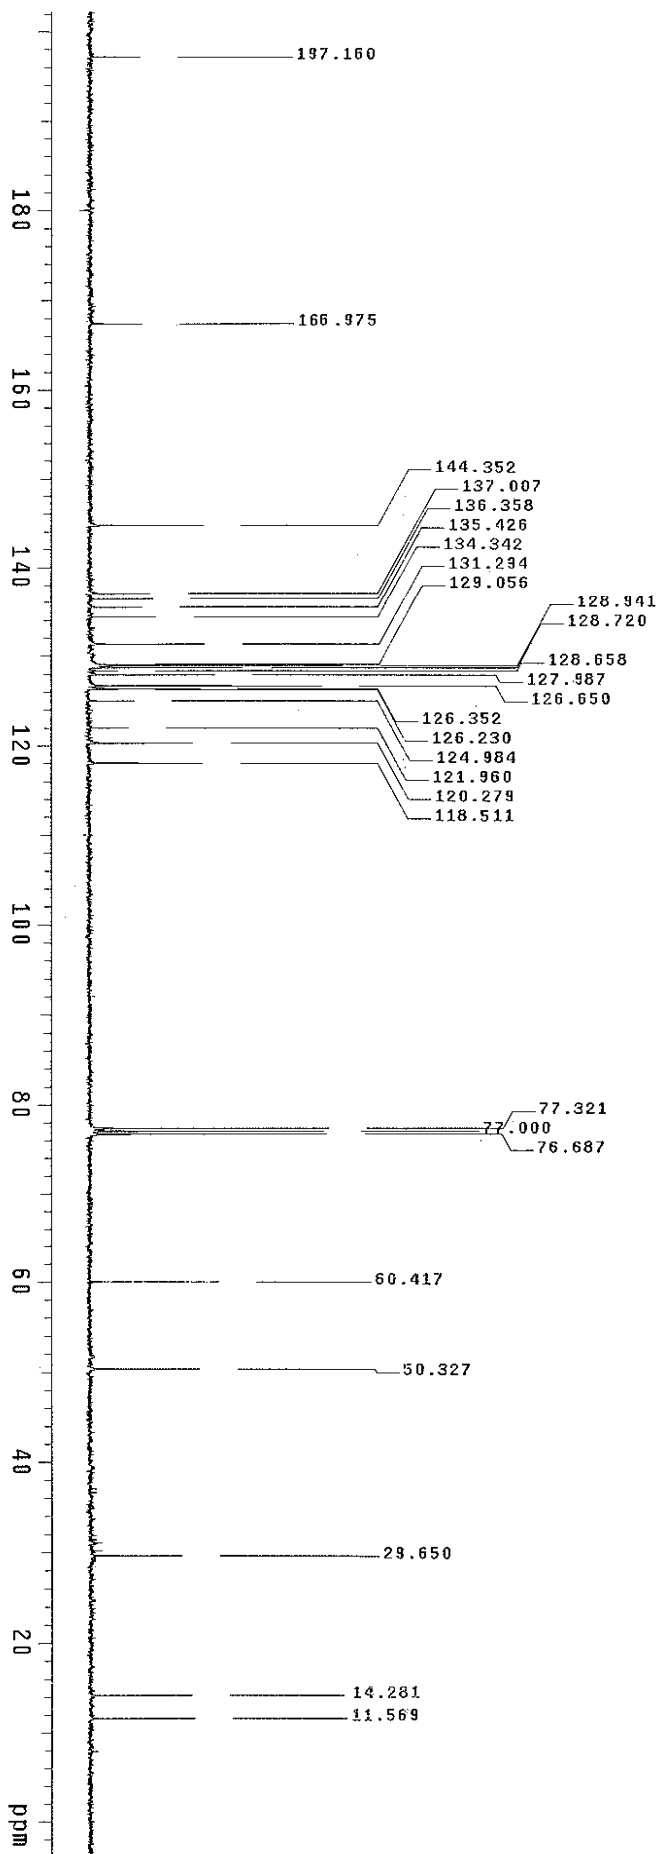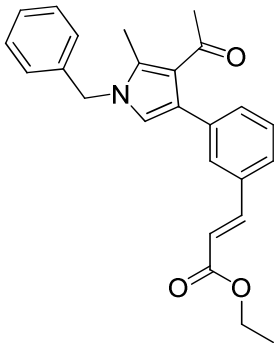

A006-C-PHR-3-002 in CDCl<sub>3</sub>  
NMR-400

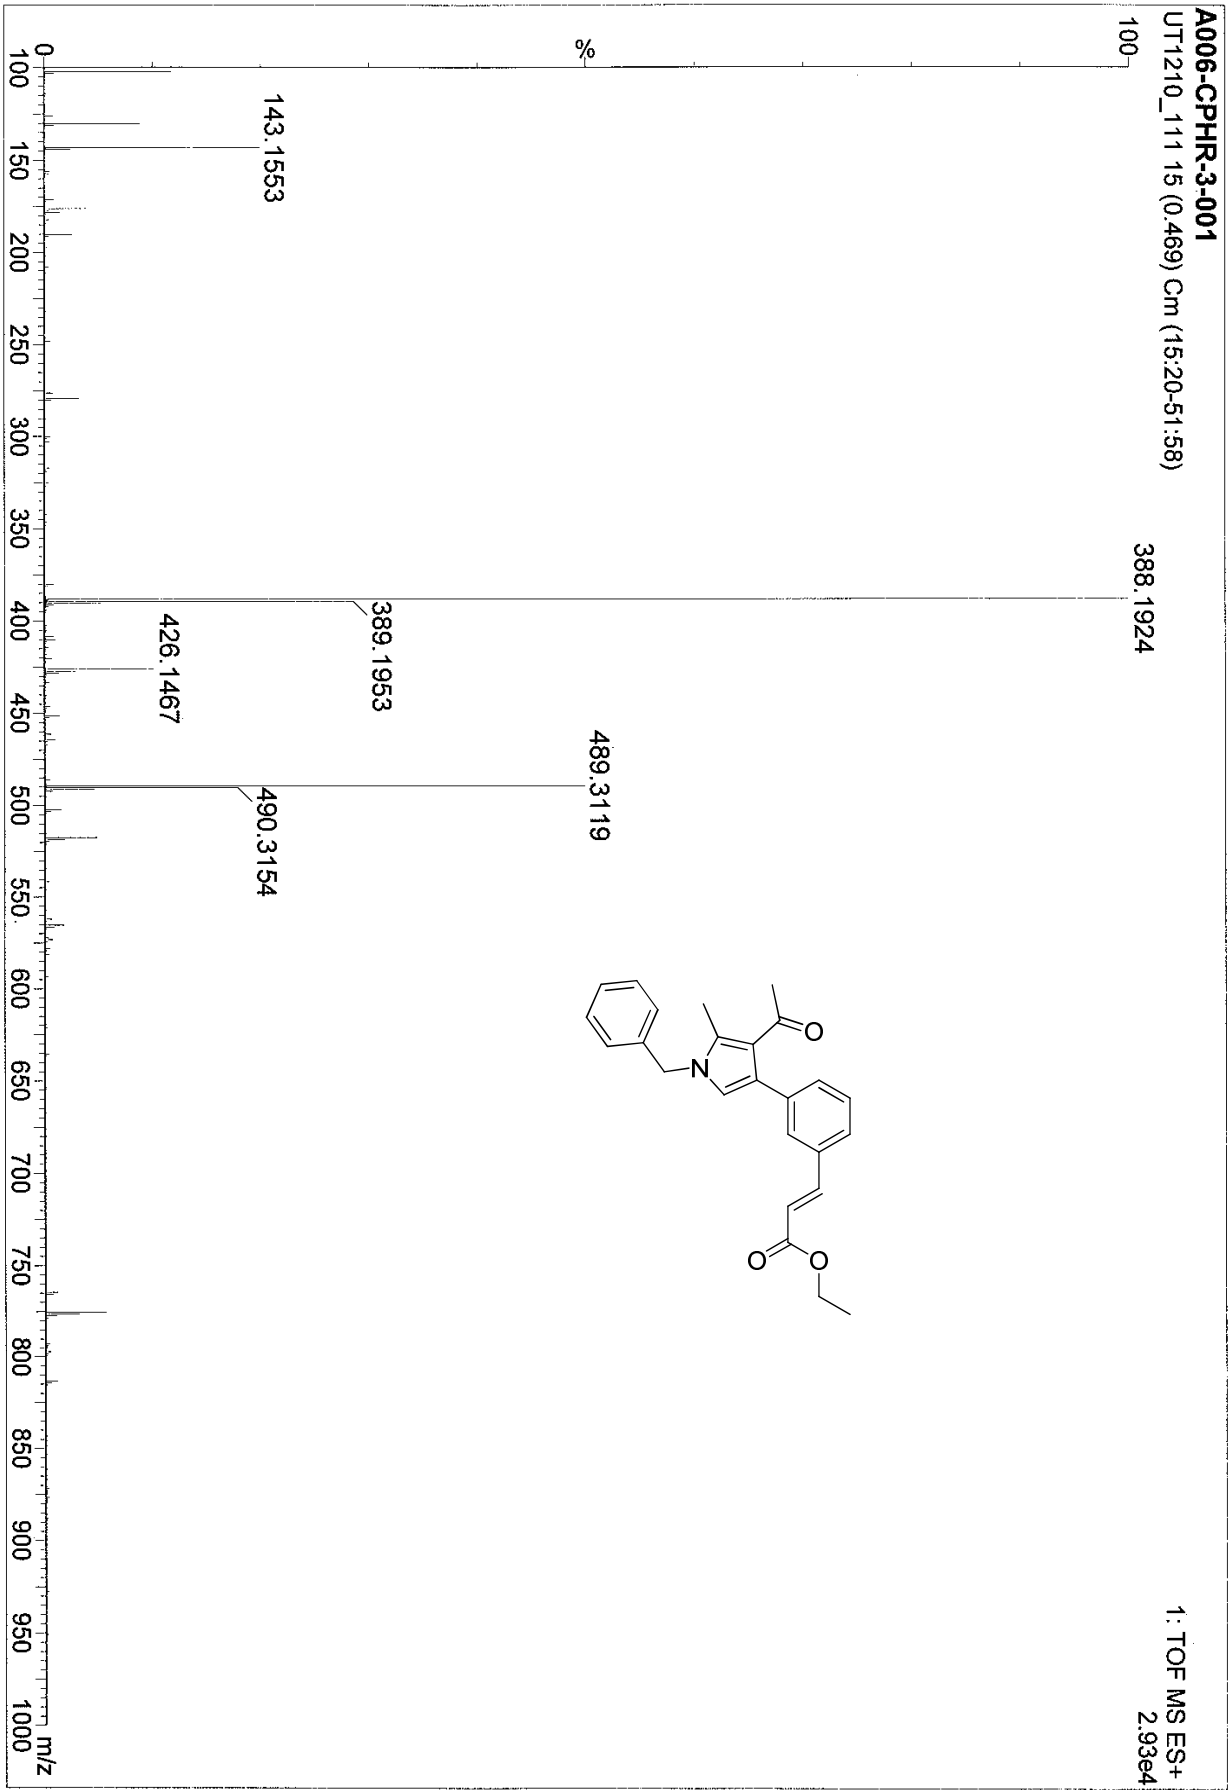



## Elemental Composition Report

### Single Mass Analysis

Tolerance = 5.0 PPM / DBE: min = -1.0, max = 80.0

Element prediction: Off

Number of isotope peaks used for i-FIT = 3

Monoisotopic Mass, Even Electron Ions

220 formula(e) evaluated with 1 results within limits (up to 4 best isotopic matches for each mass)

Elements Used:

C: 0-40 H: 0-55 N: 0-6 O: 0-6

Ac06-CPIHR-3-001

UT1210\_111 15 (0.469) Cm (15:20:51:58)

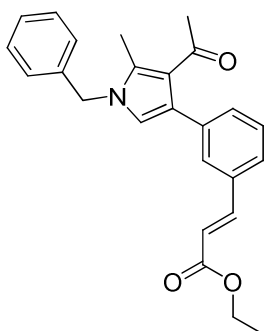

1: TOF MS ES+  
2.93e+004

G. R. Reddy et. al. Pd-Mediated new synthesis of pyrroles

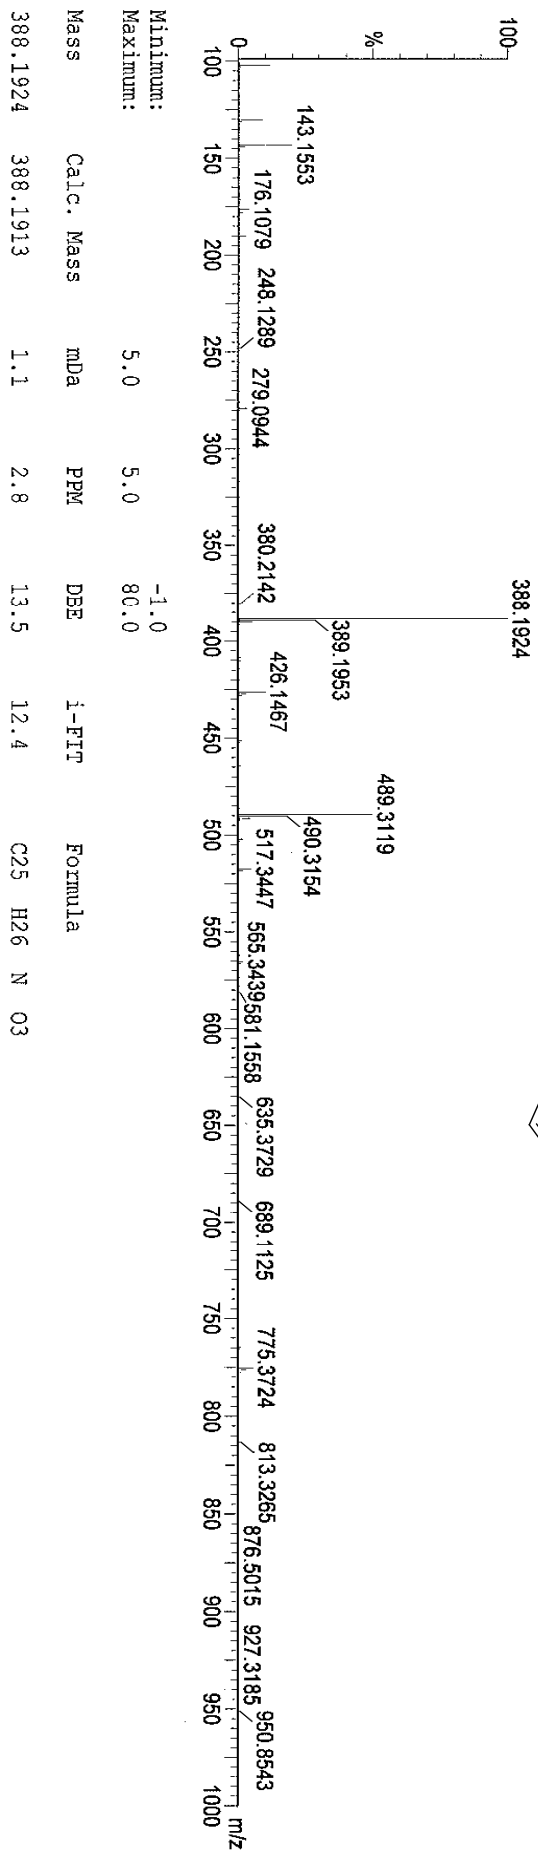

Minimum: -1.0  
Maximum: 5.0

Mass Calc. Mass mDa PPM DBE i-FIT Formula

388.1924 388.1913 1.1 2.8 13.5 12.4 C25 H26 N O3

A006-CPHR-3-002 in CDCl3  
NMR-400

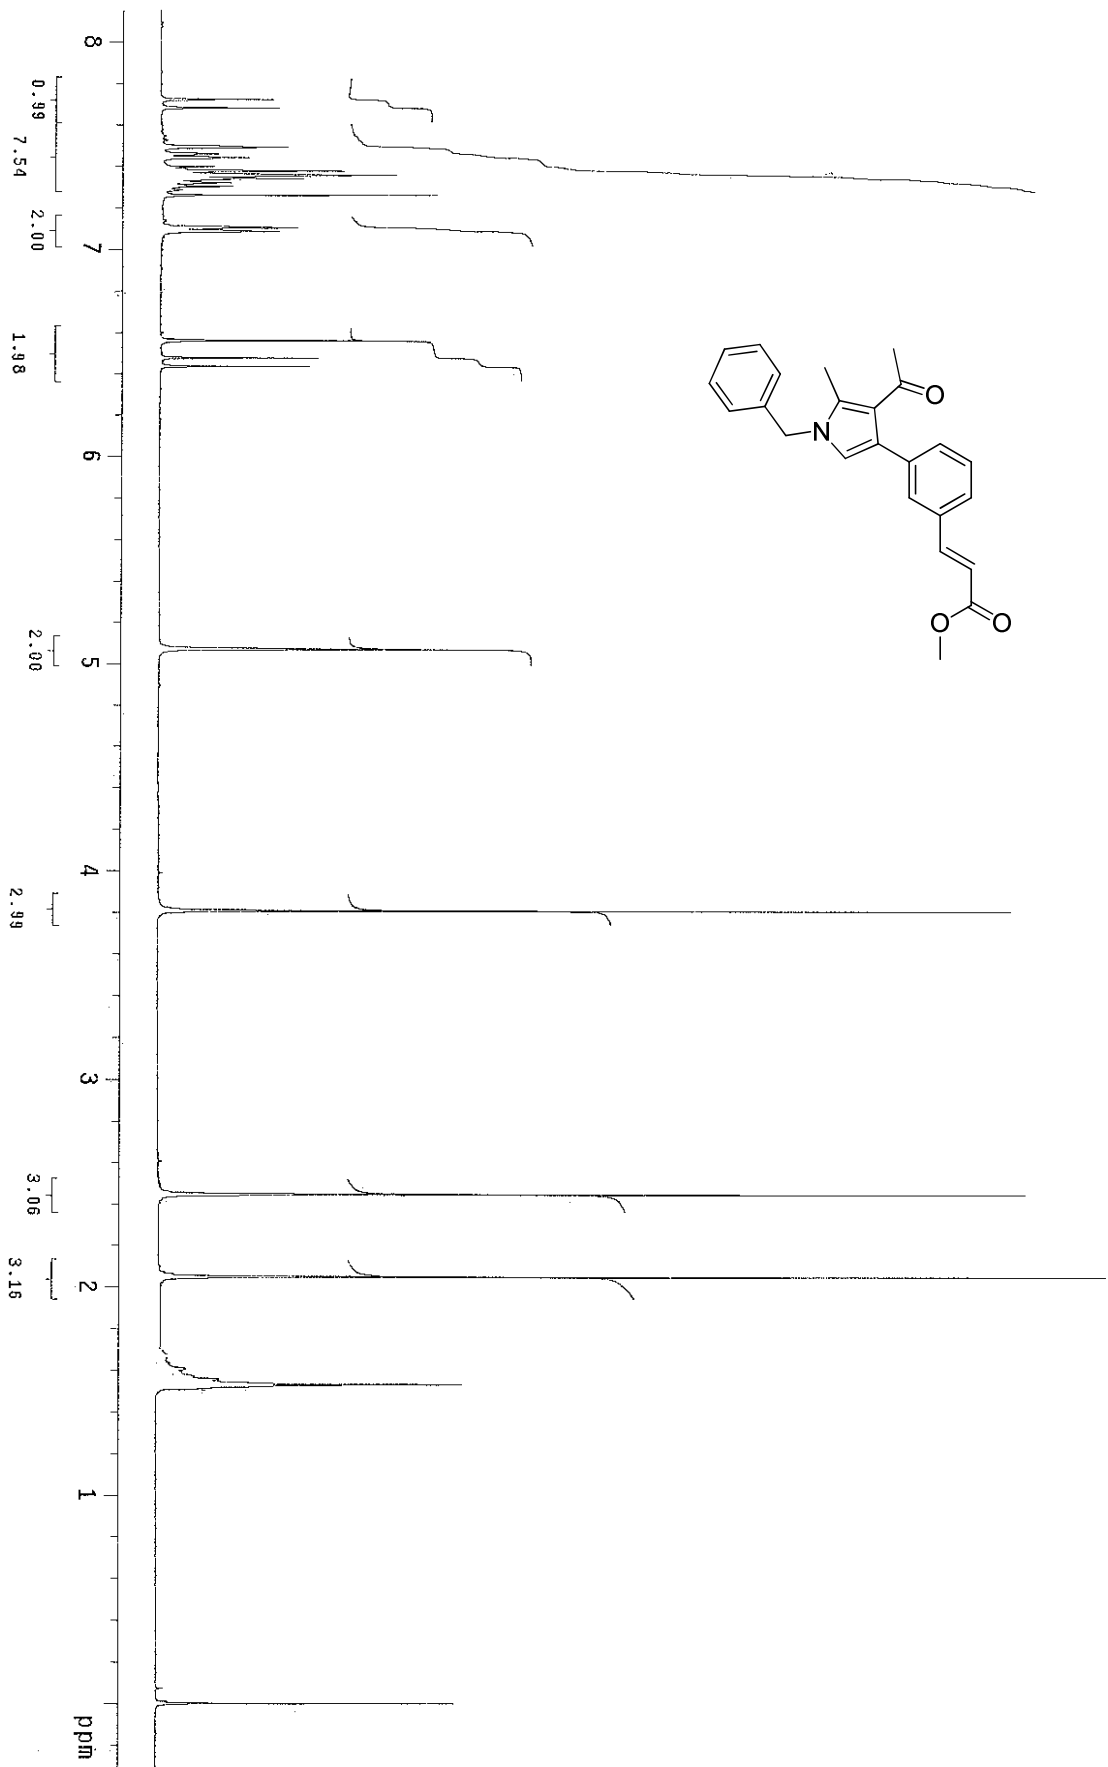

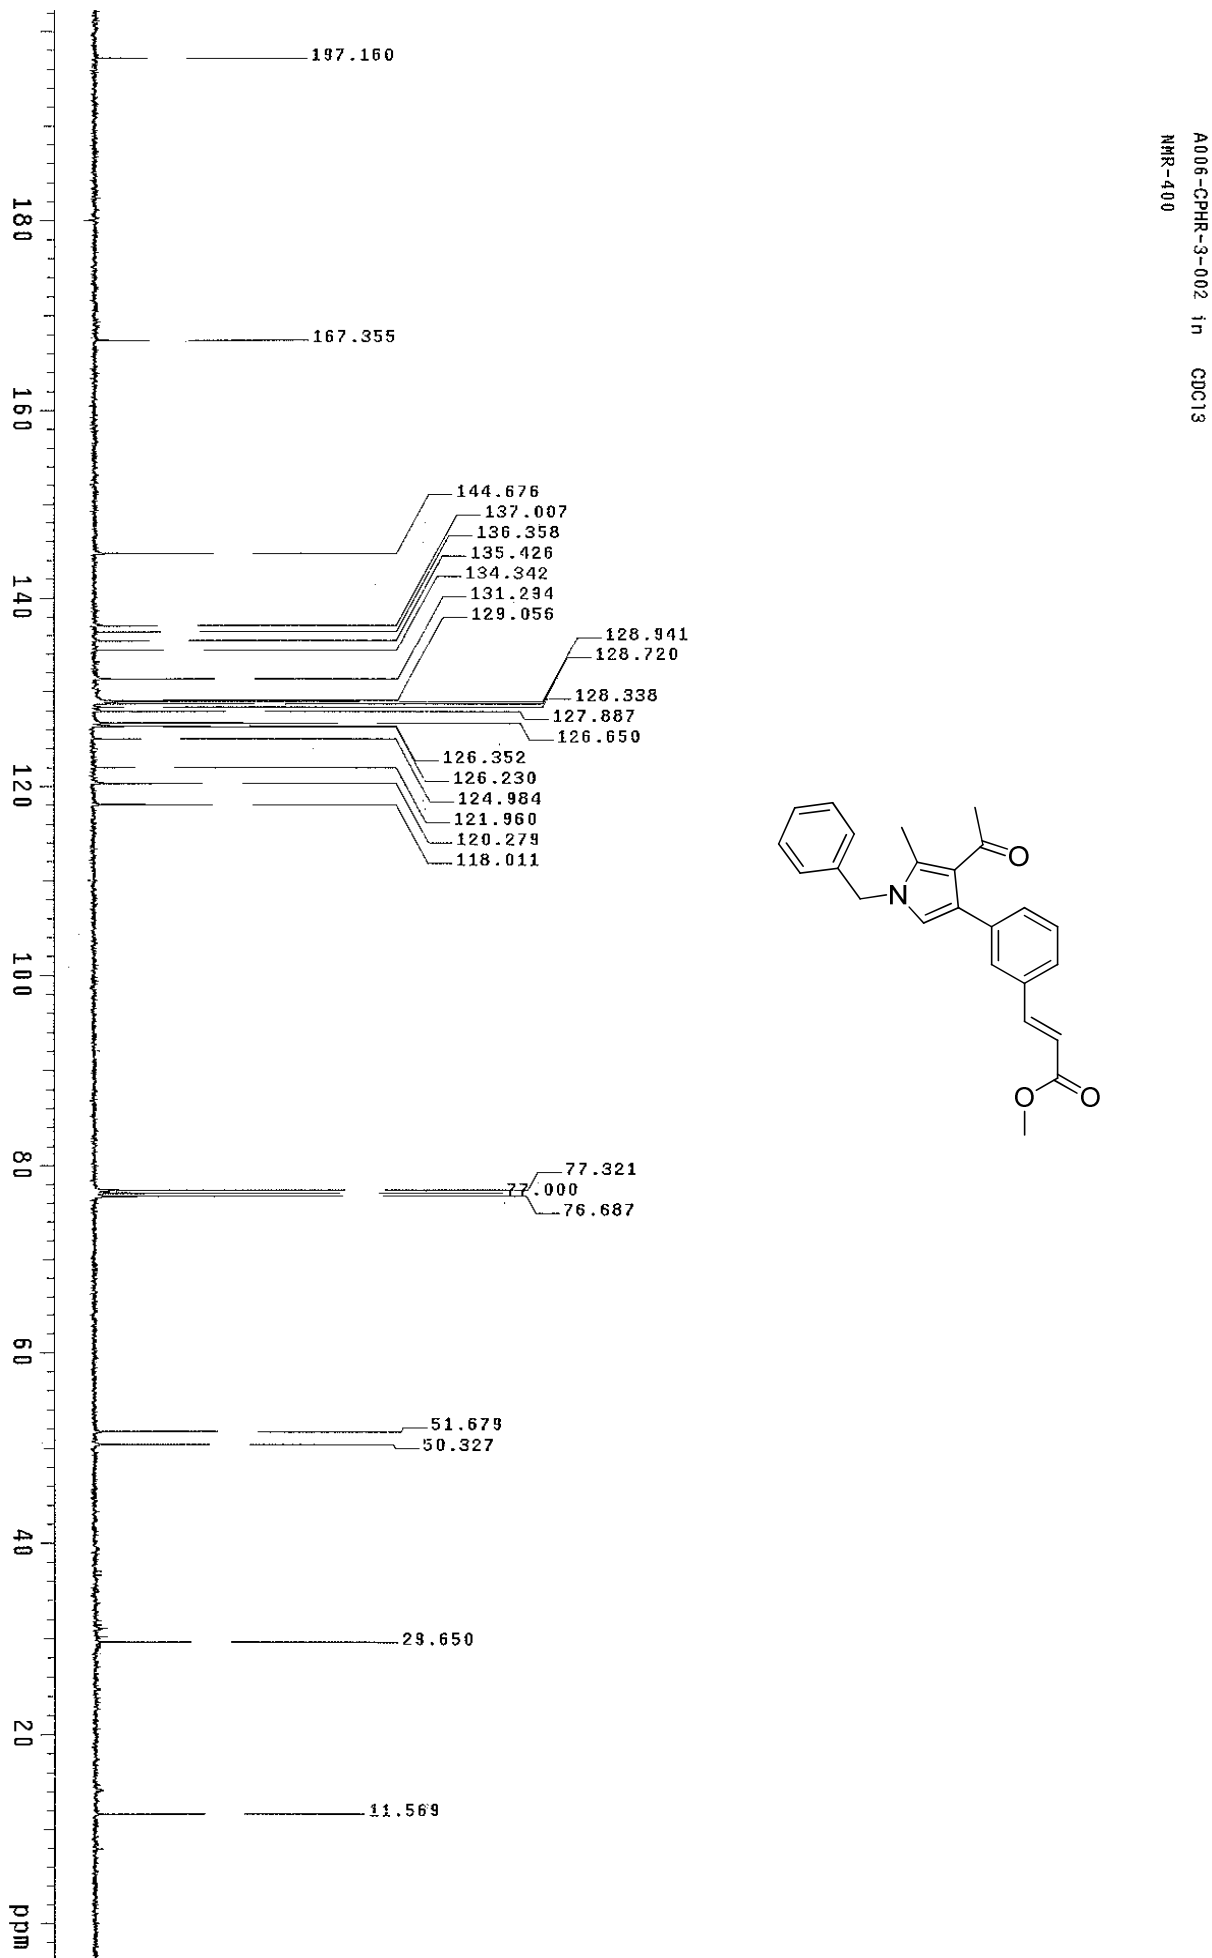

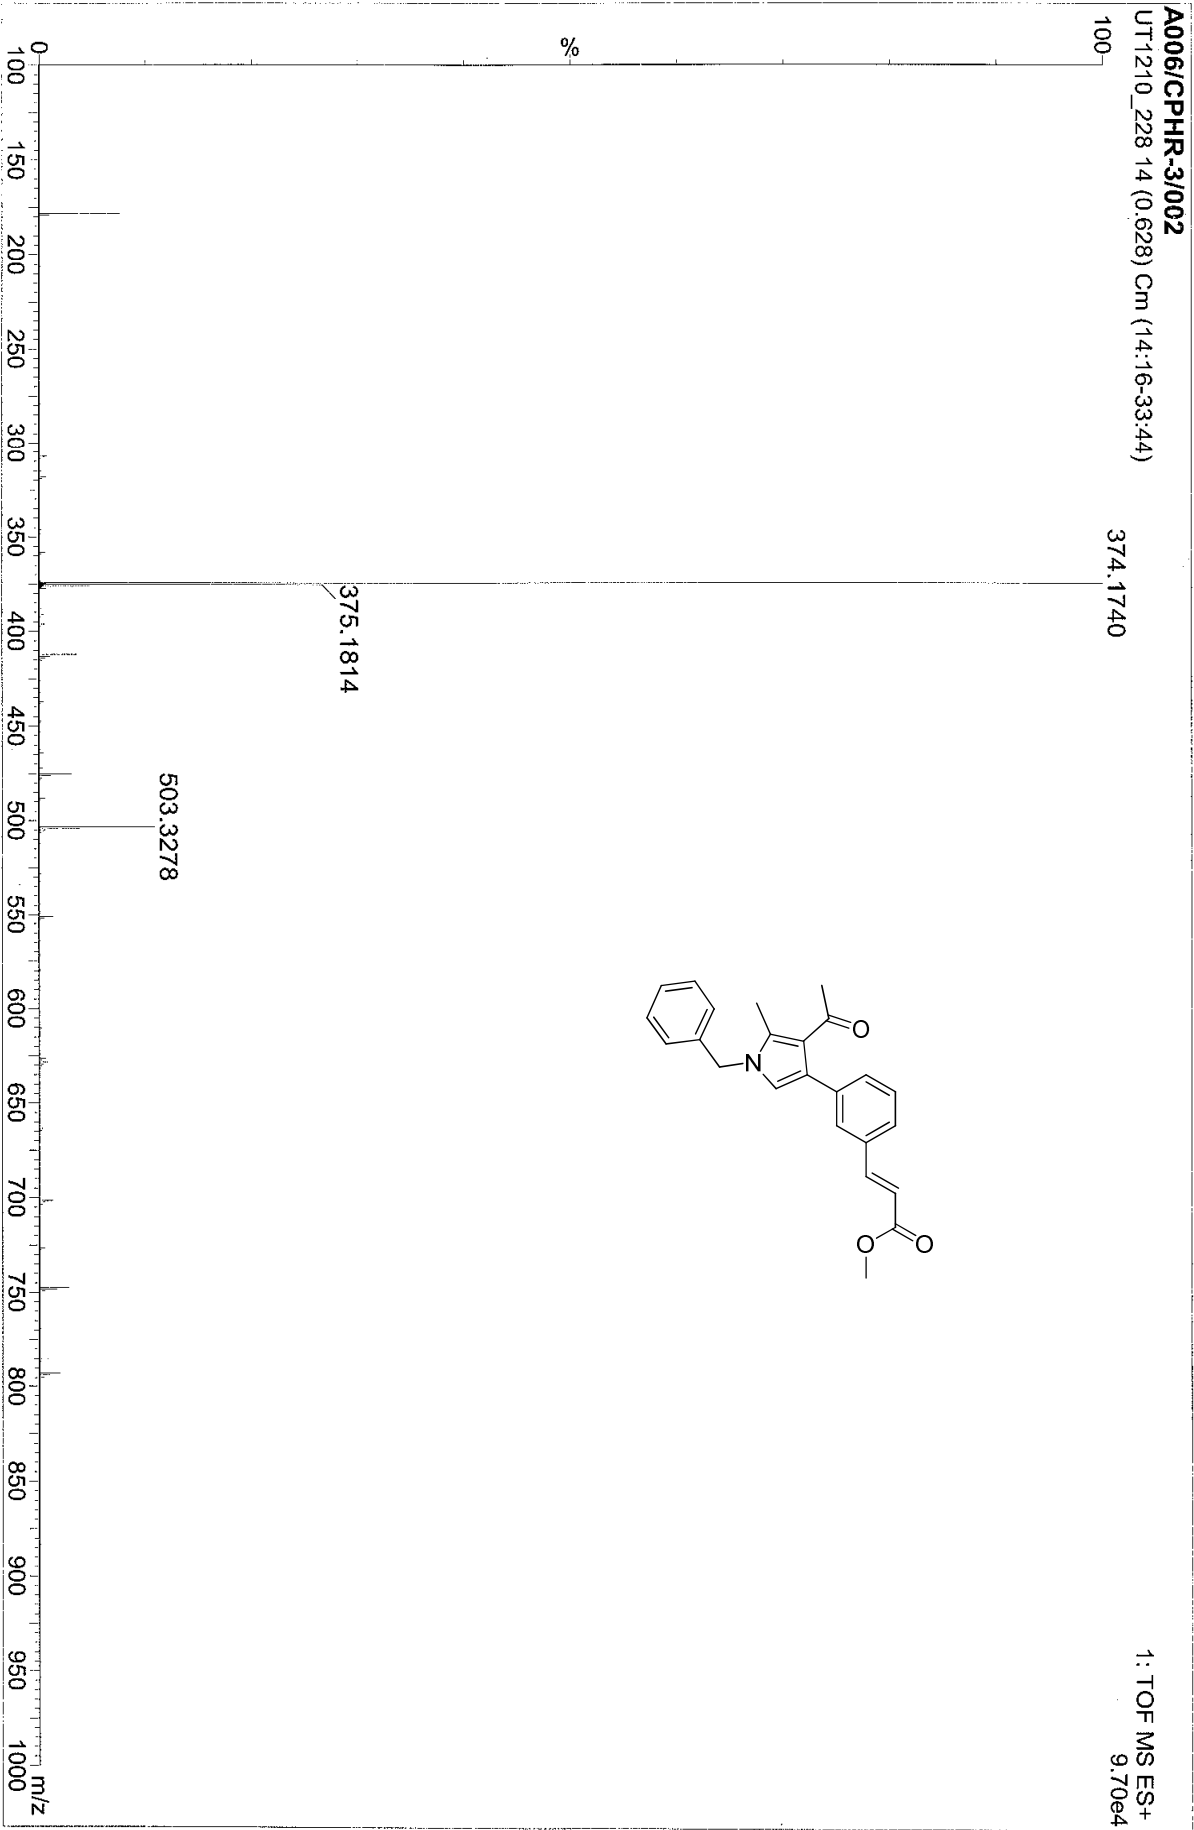

## Elemental Composition Report

### Single Mass Analysis

Tolerance = 20.0 PPM / DBE: min = -1.0, max = 80.0

Element prediction: Off

Number of isotope peaks used for i-FIT = 3

Monoisotopic Mass, Even Electron Ions

Formula(e) evaluated with 1 results within limits (up to 4 best isotopic matches for each mass)

Elements Used:

C:0-30 H:0-430 N:0-3 O:0-3

AC06/CPHR-3/002

UT0210\_228 14 (0.628) Cm (14:16-33:44)

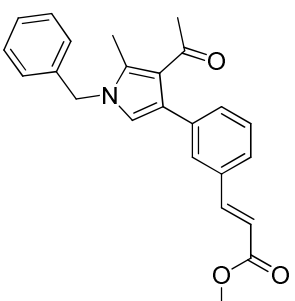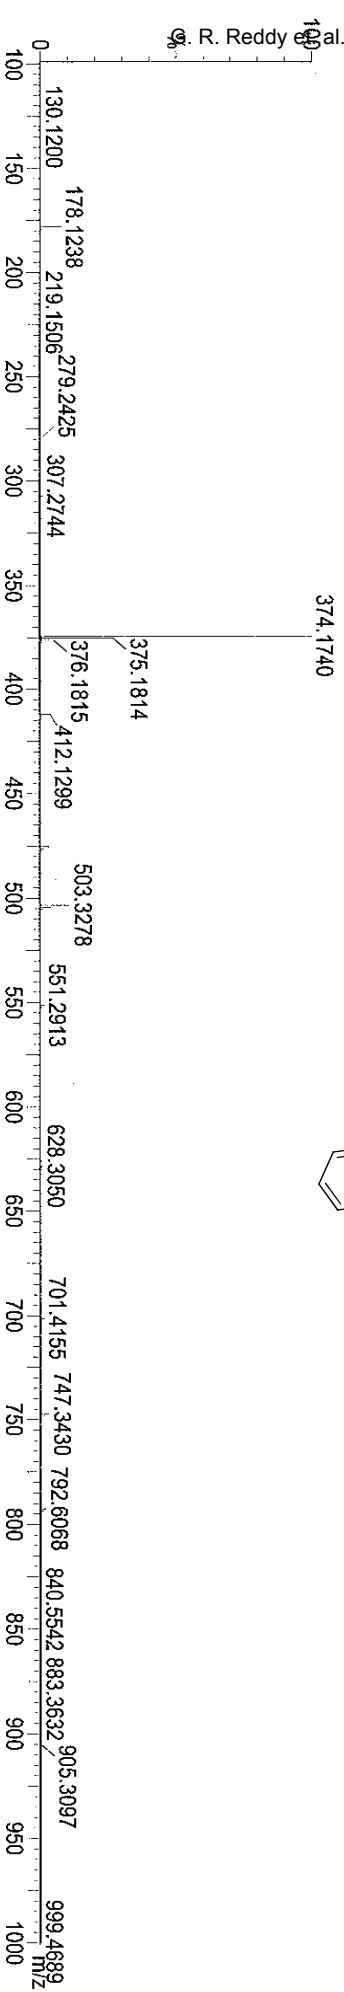

1: TOF MS ES+  
9.70e+004

Minimum: -1.0  
Maximum: 80.0

| Mass     | Calc. Mass | mDa  | PPM  | DBE  | i-FIT | Formula      |
|----------|------------|------|------|------|-------|--------------|
| 374.1740 | 374.1756   | -1.6 | -4.3 | 13.5 | 49.0  | C24 H24 N O3 |

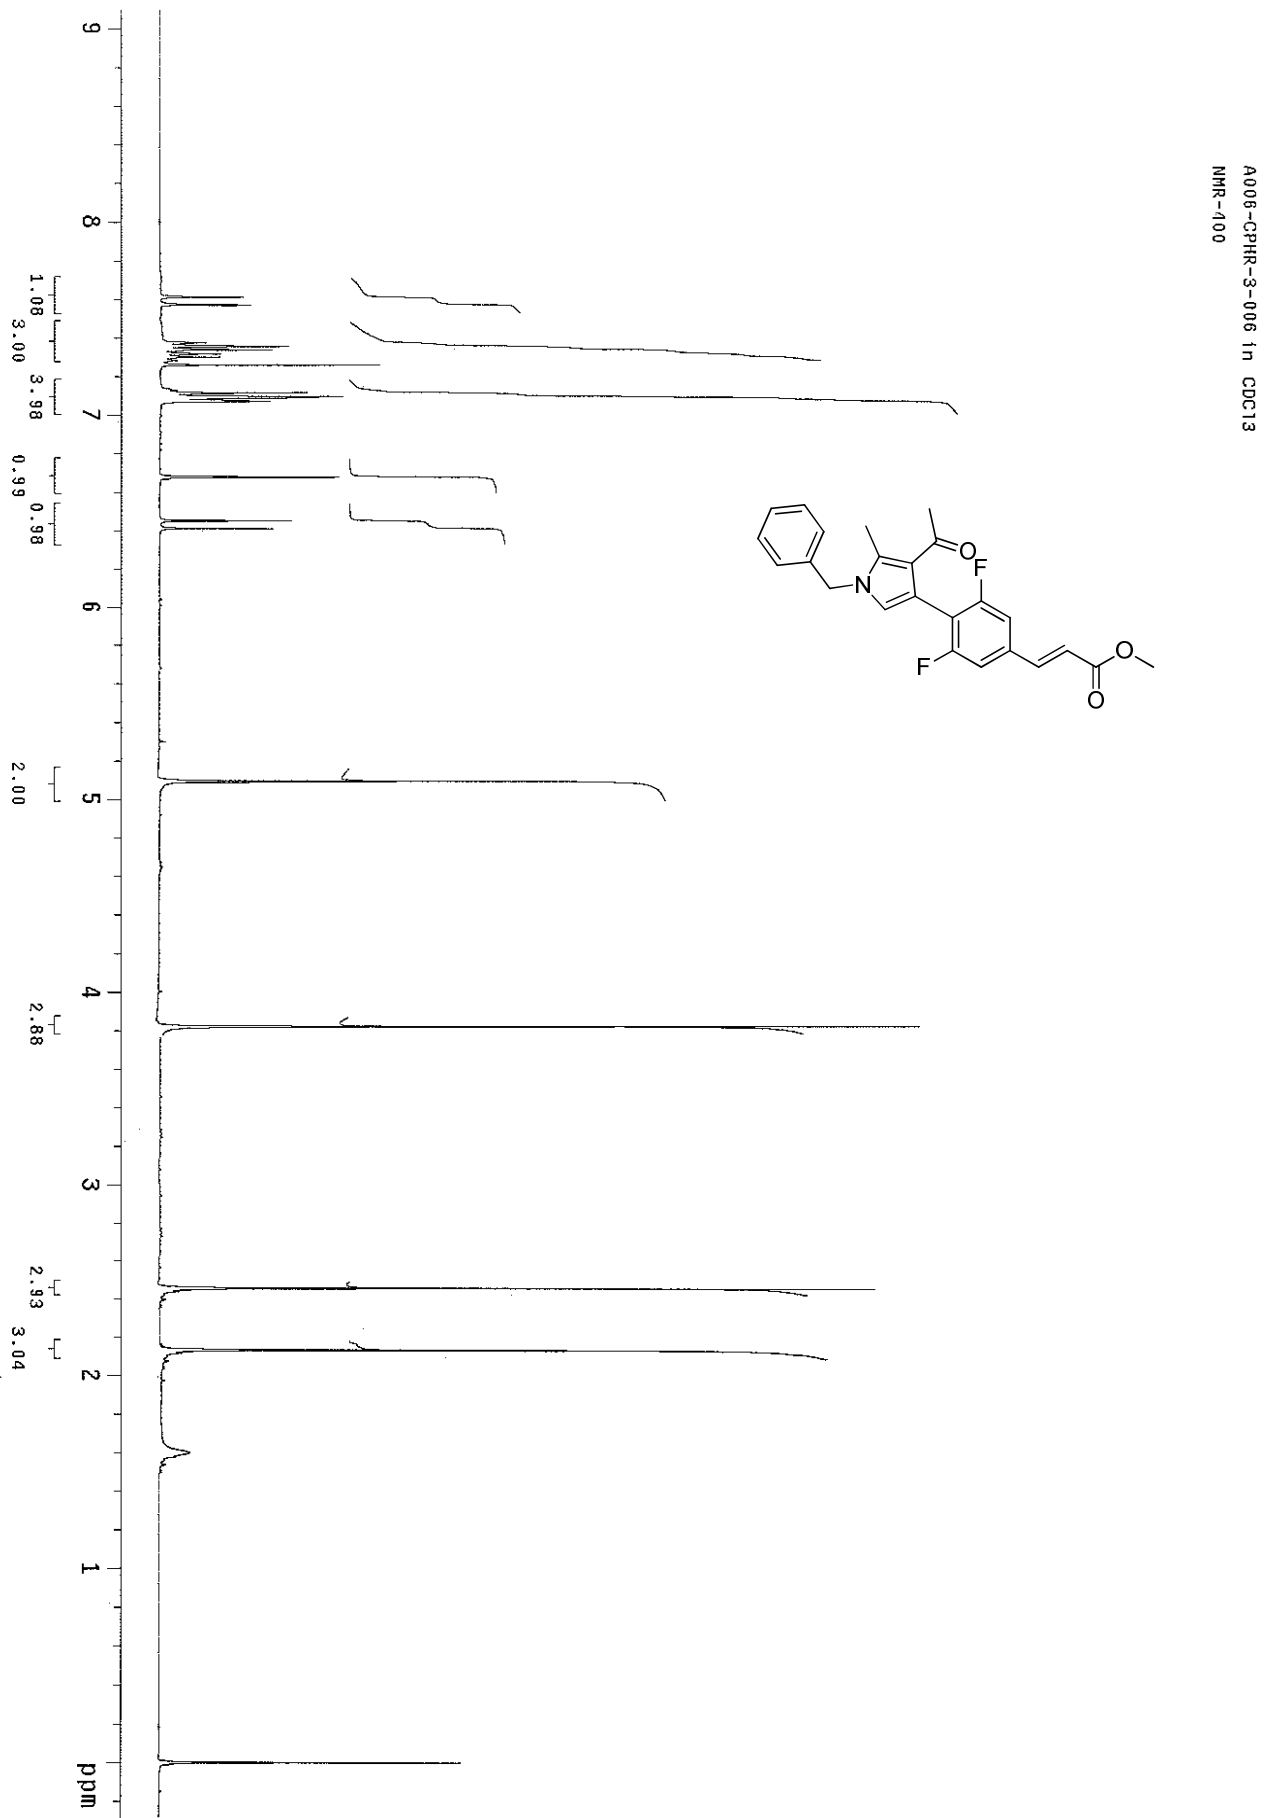

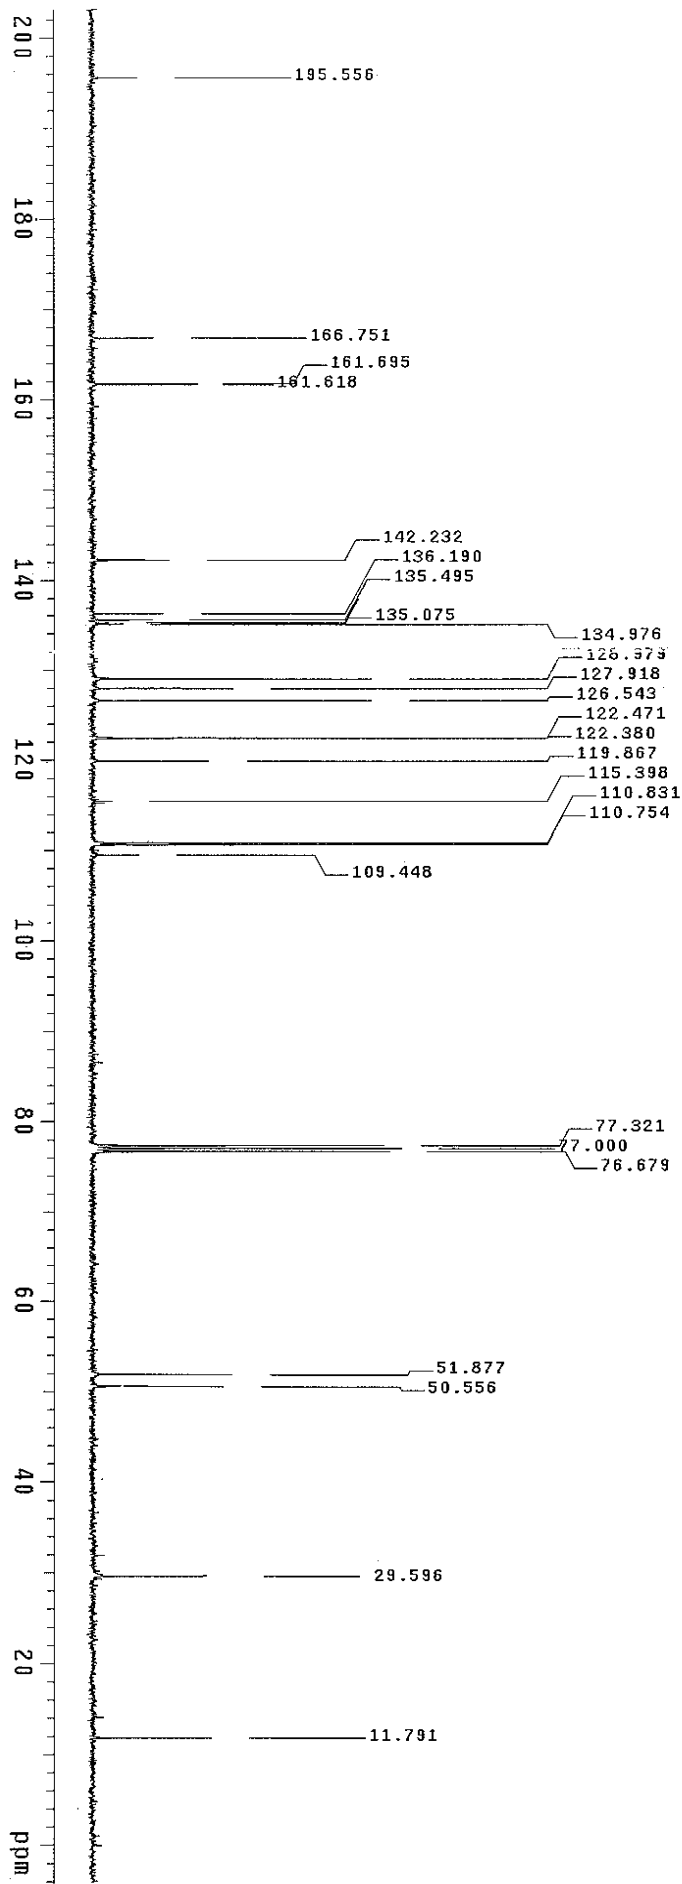

A006/CPHR-3/006 in CDCl<sub>3</sub>  
NMR-400

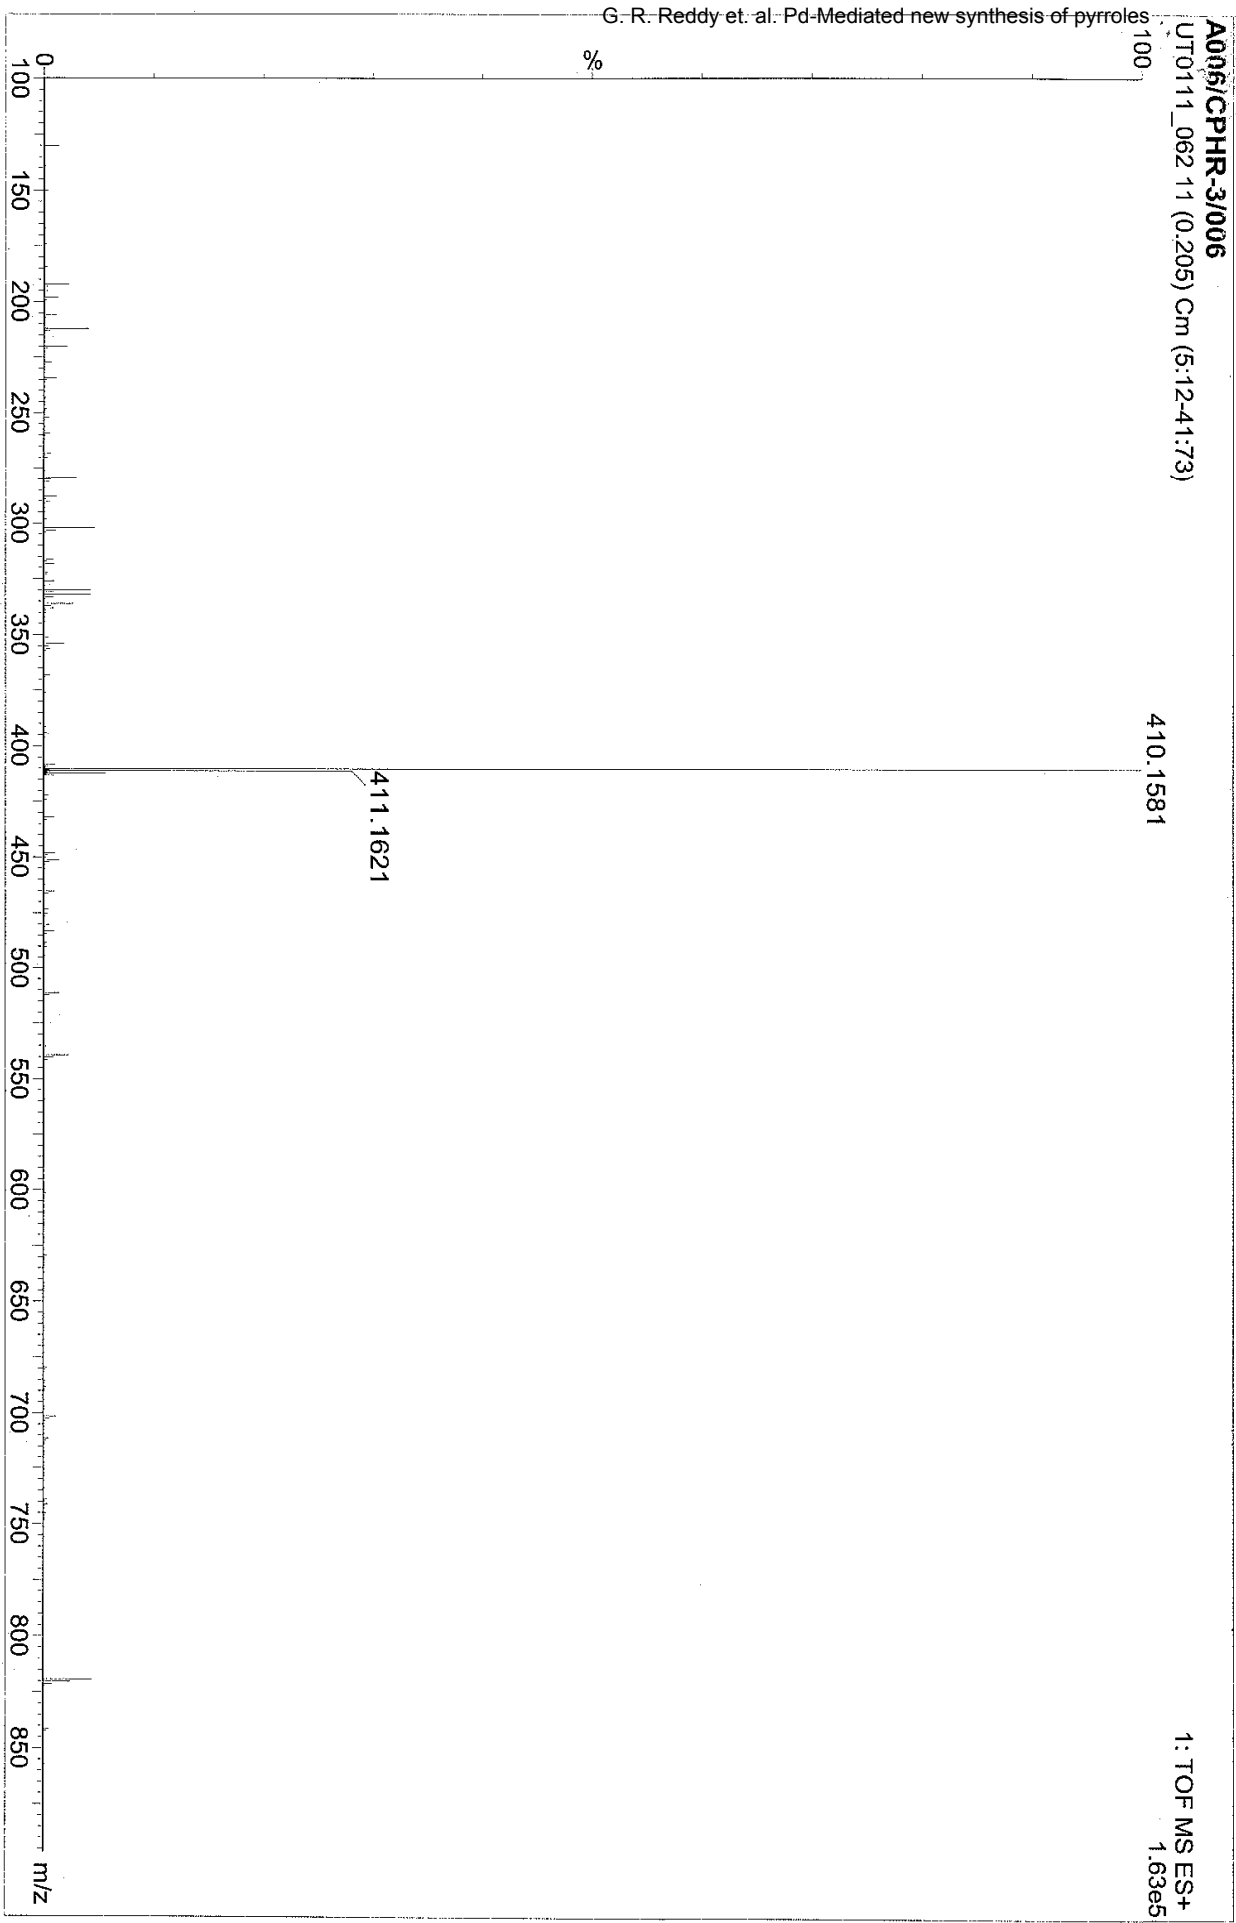



## Elemental Composition Report

### Single Mass Analysis

Tolerance = 15.0 PPM / DBE: min = -1.0, max = 80.0

Element prediction: Off

Number of isotope peaks used for i-FIT = 4

Monoisotopic Mass, Even Electron Ions

1563.3006 (e) evaluated with 2 results within limits (up to 15 closest results for each mass)

Elements Used:

C: 6-50 H: 0-50 N: 0-5 O: 0-5

A00000CPHR-3/006

UT0711\_062 11 (0.205) Cm (5:12-41:73)

100%

Reddy et al. Po

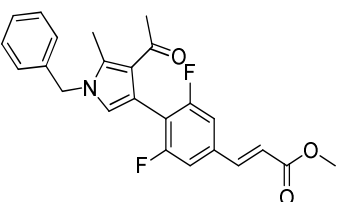

1: TOF MS ES+  
1.63e+005

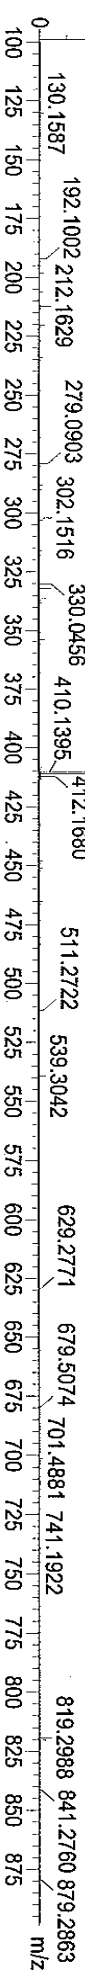

Minimum: -1.0

Maximum: 5.0 15.0 80.0

| Mass     | Calc. Mass | MDa | PPM | DBE  | i-FIT | Formula         |
|----------|------------|-----|-----|------|-------|-----------------|
| 410.1581 | 410.1545   | 3.6 | 8.8 | 21.5 | 877.7 | C24 H22 N O3 F2 |

A006-CPHR-3-008 in CDCl3  
NMR-400

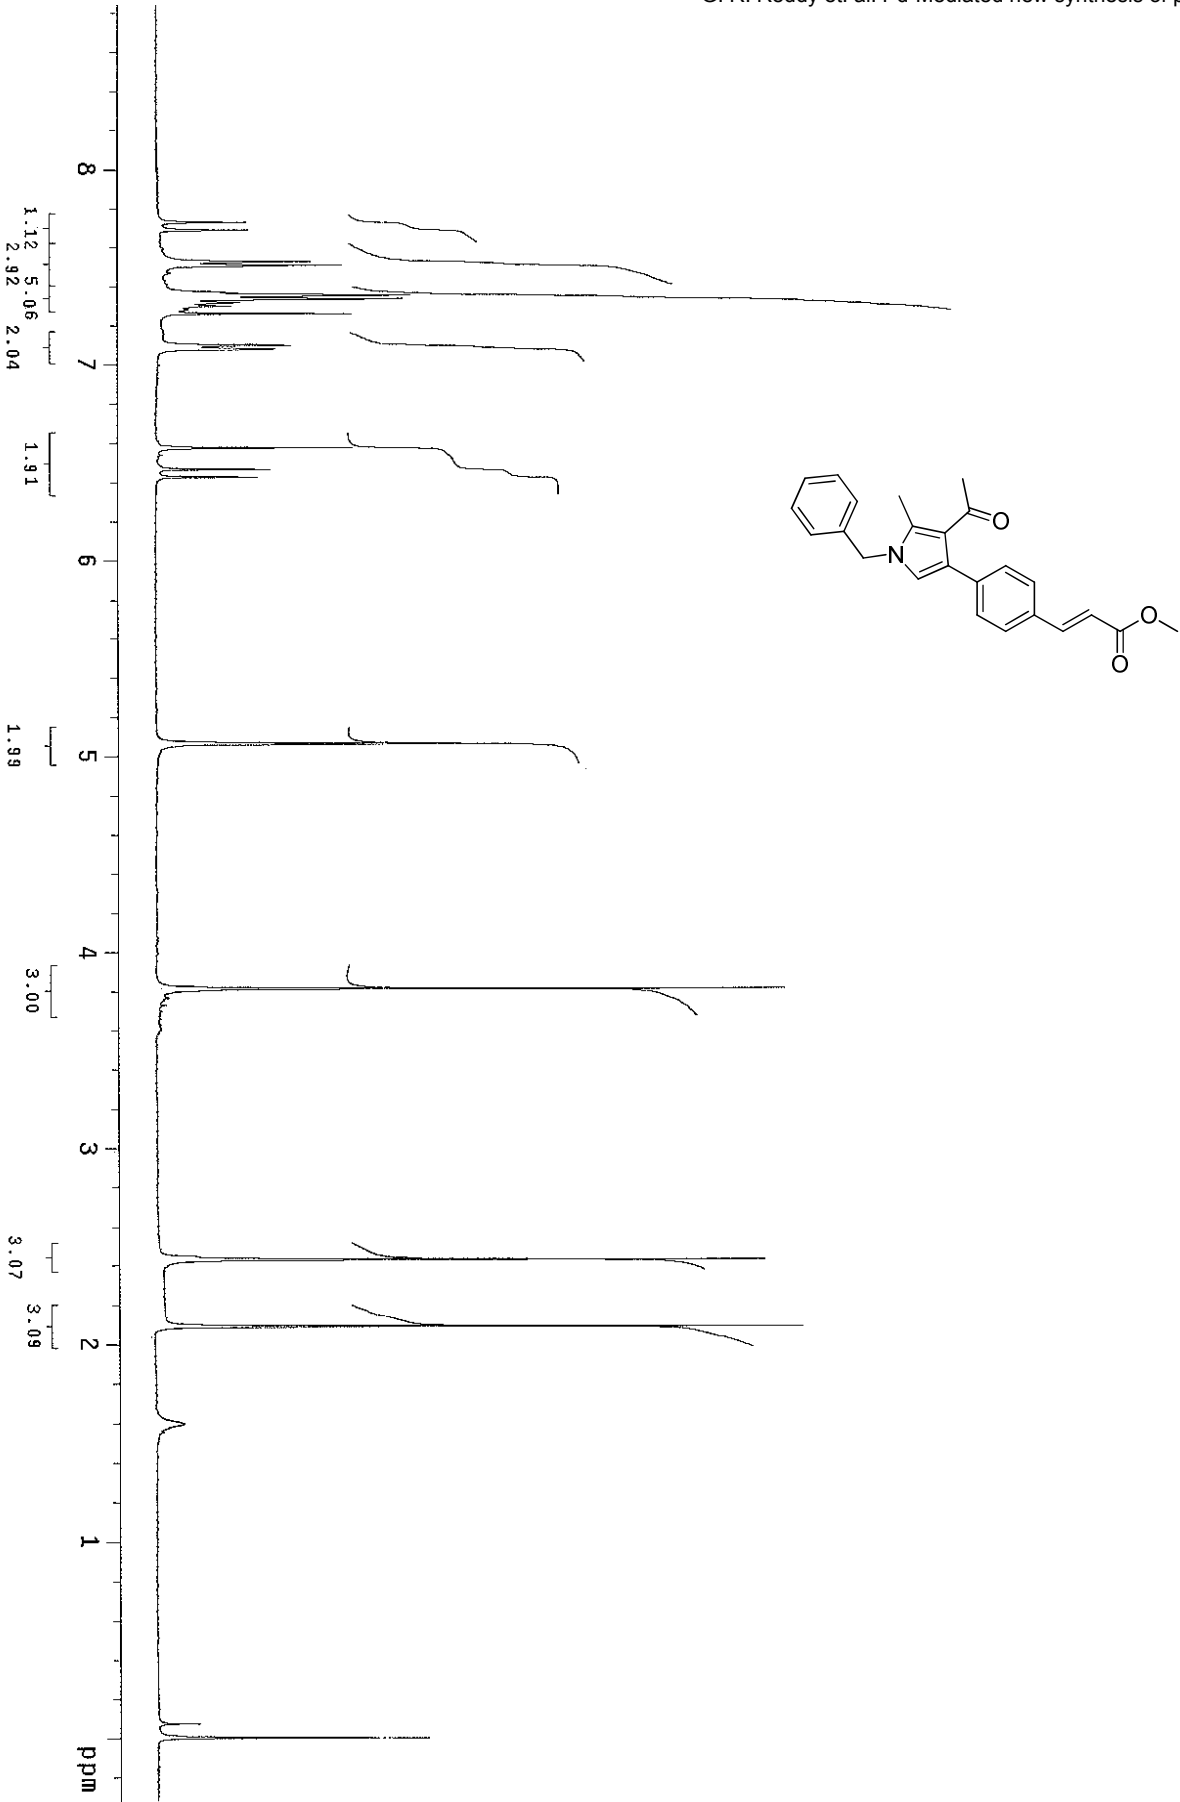

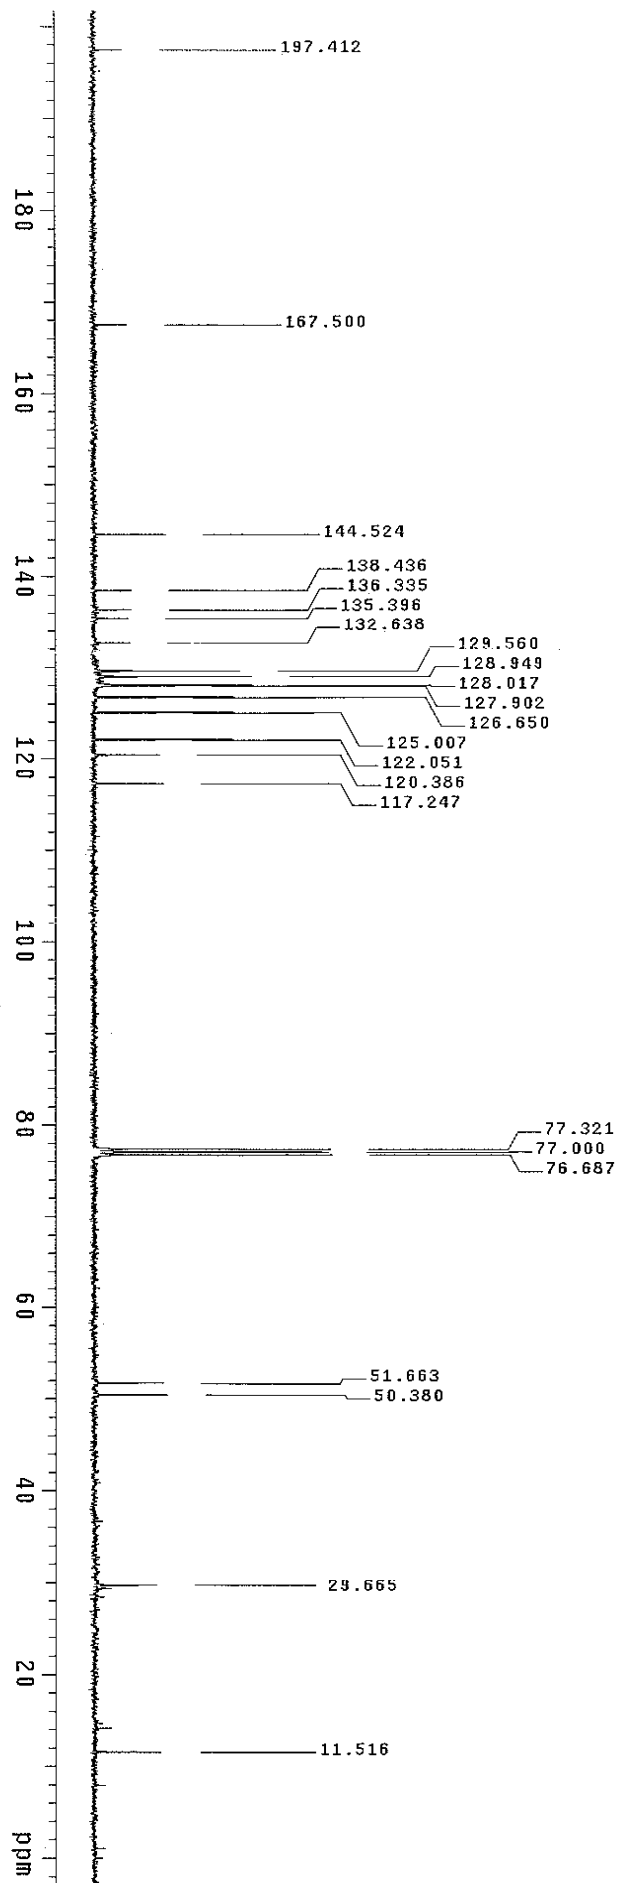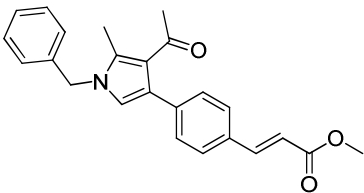

A006/CPHR-3/008 in CDCl<sub>3</sub>  
NMR-400

A006/CPHR-3/008

UT0111\_063 10 (0.191) Cm (10:16-23:38)

G. R. Reddy et. al. Pd-Mediated new synthesis of pyrroles

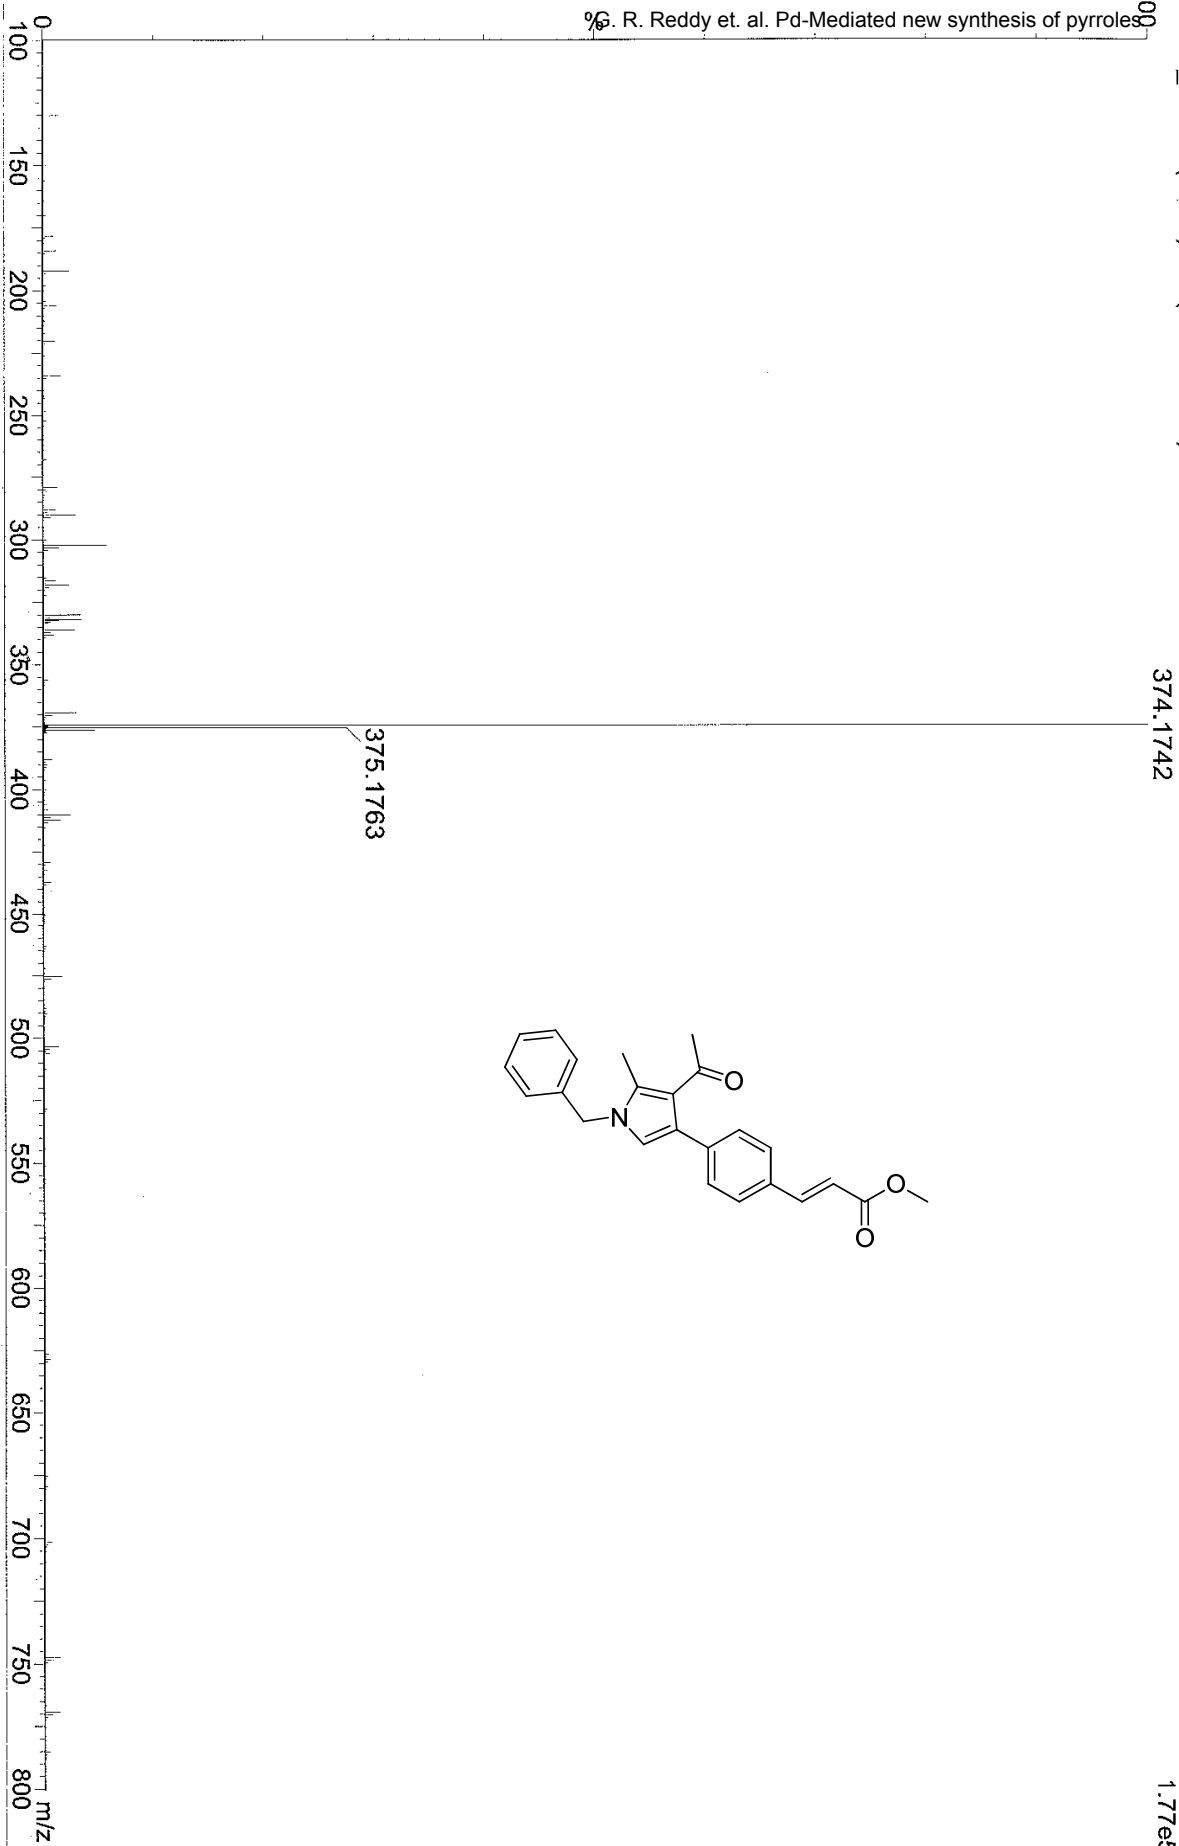

1: TOF MS ES+  
1.77e5

# Elemental Composition Report

## Single Mass Analysis

Tolerance = 10.0 PPM / DBE: min = -1.0, max = 80.0

Element prediction: Off

Number of isotope peaks used for i-FIT = 4

Monoisotopic Mass, Even Electron Ions

456 formula(e) evaluated with 5 results within limits (up to 10 closest results for each mass)

Elements Used:

C: 0-50 H: 0-50 N: 0-5 O: 0-5 F: 0-2

A00680.PHR-3/008

UT011\_063 10 (0.191) Cm (10:16-23:38)

374.1742

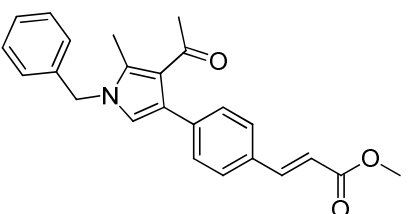

1: TOF MS ES+  
1.77e+005

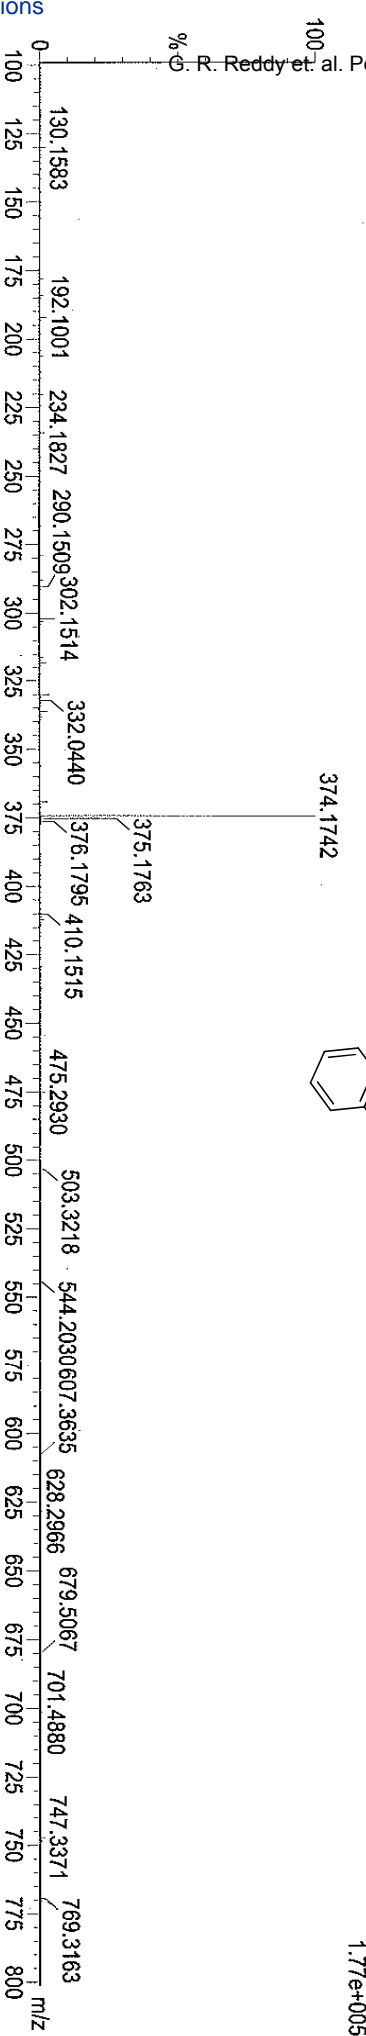

Minimum: -1.0  
Maximum: 5.0 10.0 80.0

| Mass     | Calc. Mass | mDa  | PPM  | DBE  | i-FIT | Formula      |
|----------|------------|------|------|------|-------|--------------|
| 374.1742 | 374.1756   | -1.4 | -3.7 | 13.5 | 91.2  | C24 H24 N O3 |

A006-CPHR-4-009 in CDCl3  
NMR-400

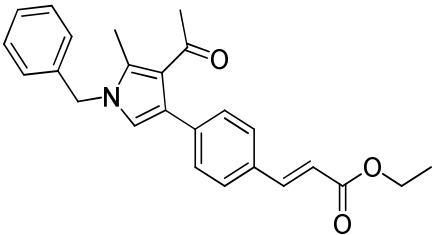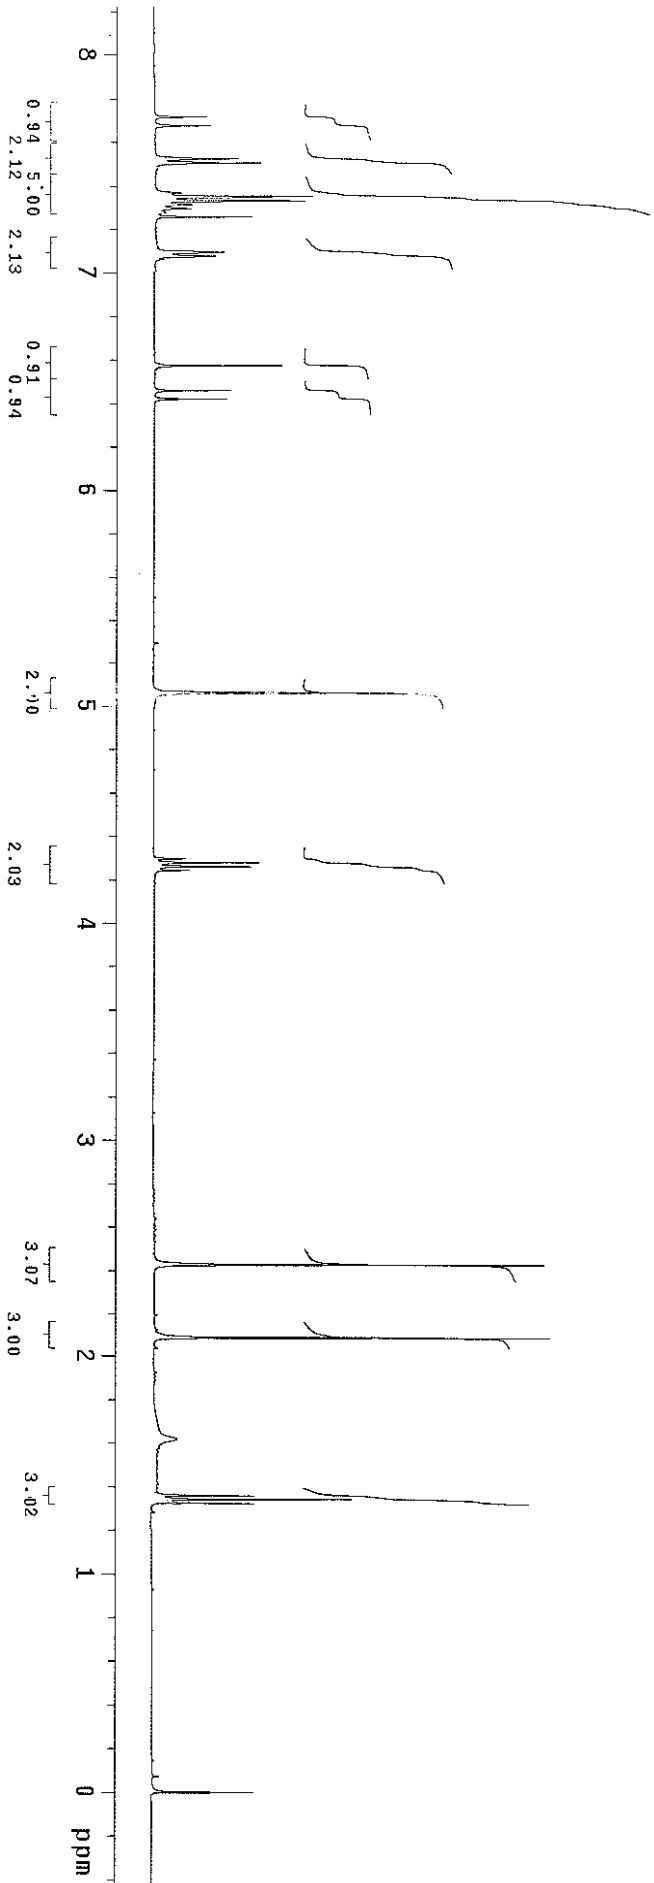

A006-CPHR-4-009 in CDCl3  
NMR-400

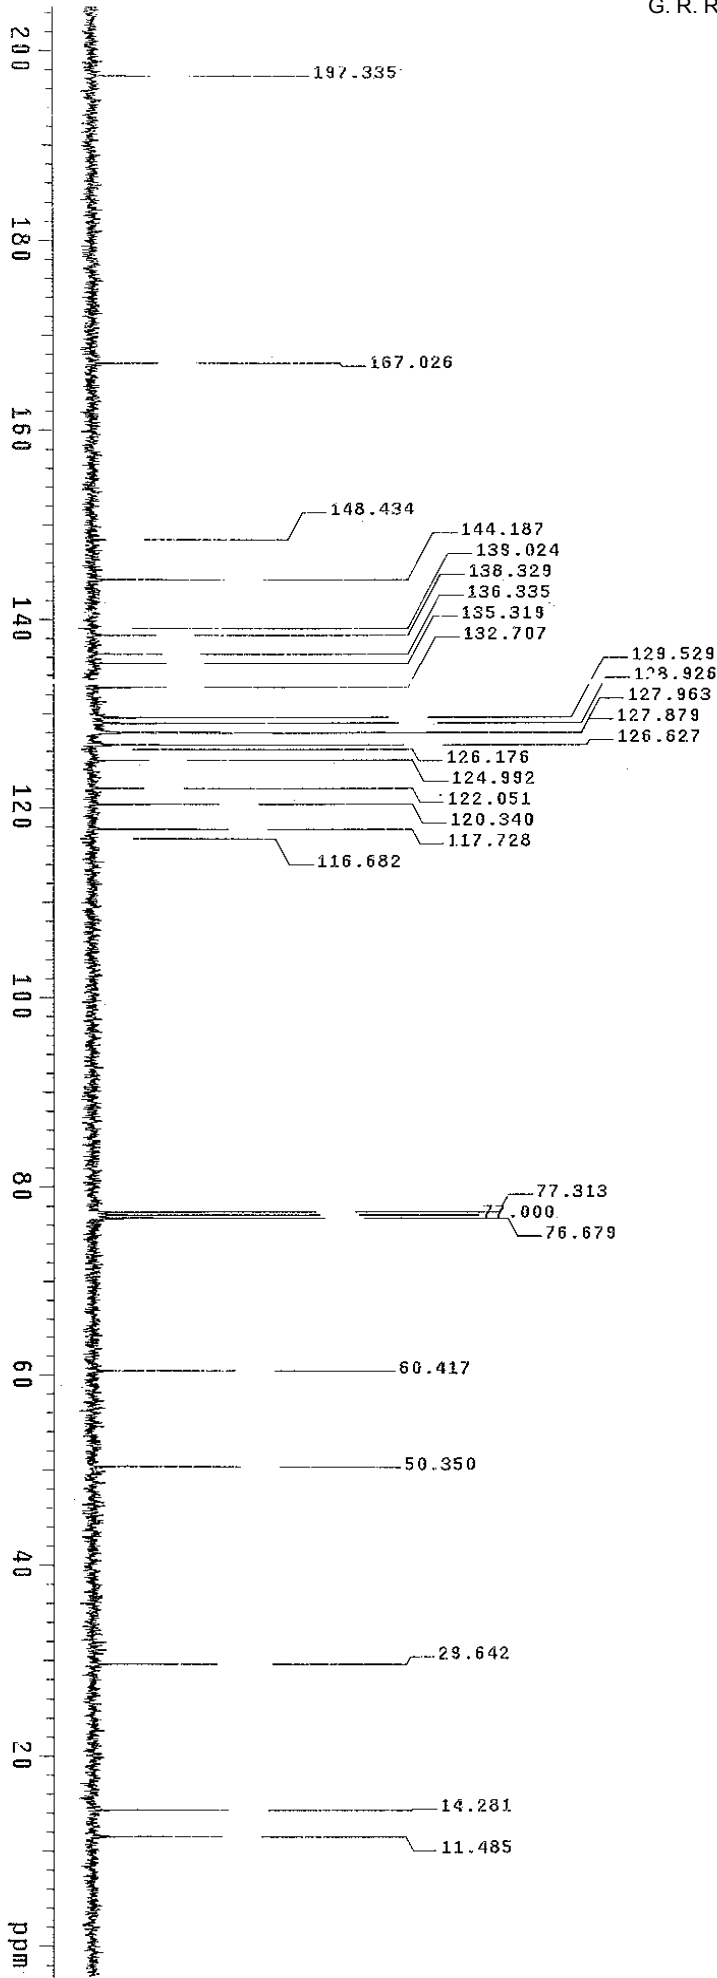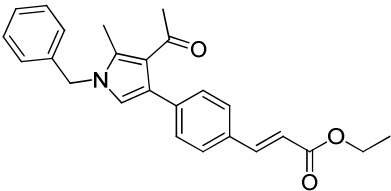

A006-CPHR4-009

UT0111\_193 54 (1.009) Cm (53:59-99:107)

28-Jan-2011

1: TOF MS ES+  
1.06e4

G. R. Reddy et. al. Pd-Mediated new synthesis of pyrroles

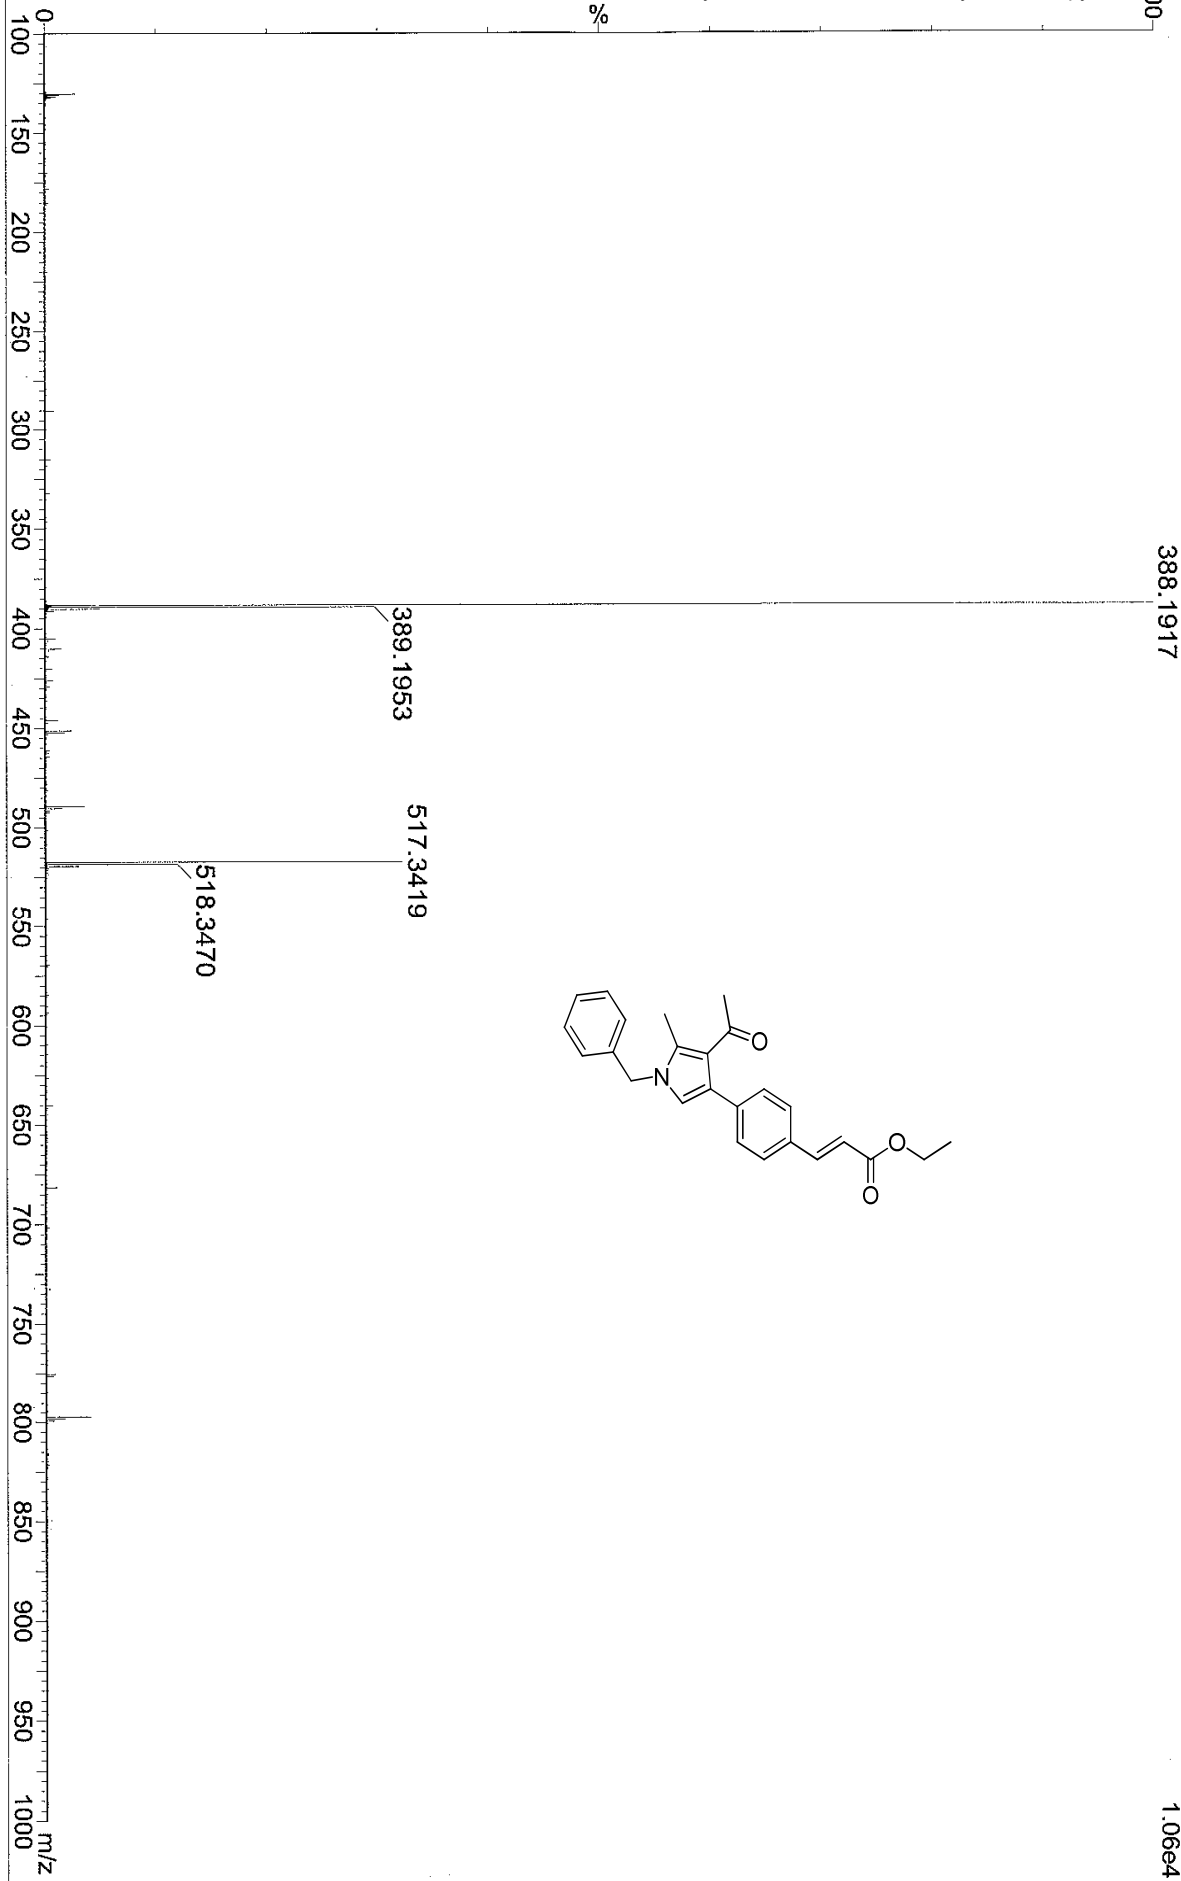



# Elemental Composition Report

## Single Mass Analysis

Tolerance = 5.0 PPM / DBE: min = -1.0, max = 80.0

Element prediction: Off

Number of isotope peaks used for i-FIT = 3

Monoisotopic Mass, Even Electron Ions

683 formula(e) evaluated with 1 results within limits (up to 4 best isotopic matches for each mass)

Elements Used:

C: 0-50 H: 0-60 N: 0-3 O: 0-6

2006-CPHR4-009

2010111\_193 54 (1.009) Cm (53:59-99:107)

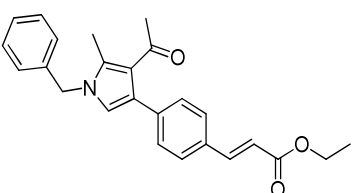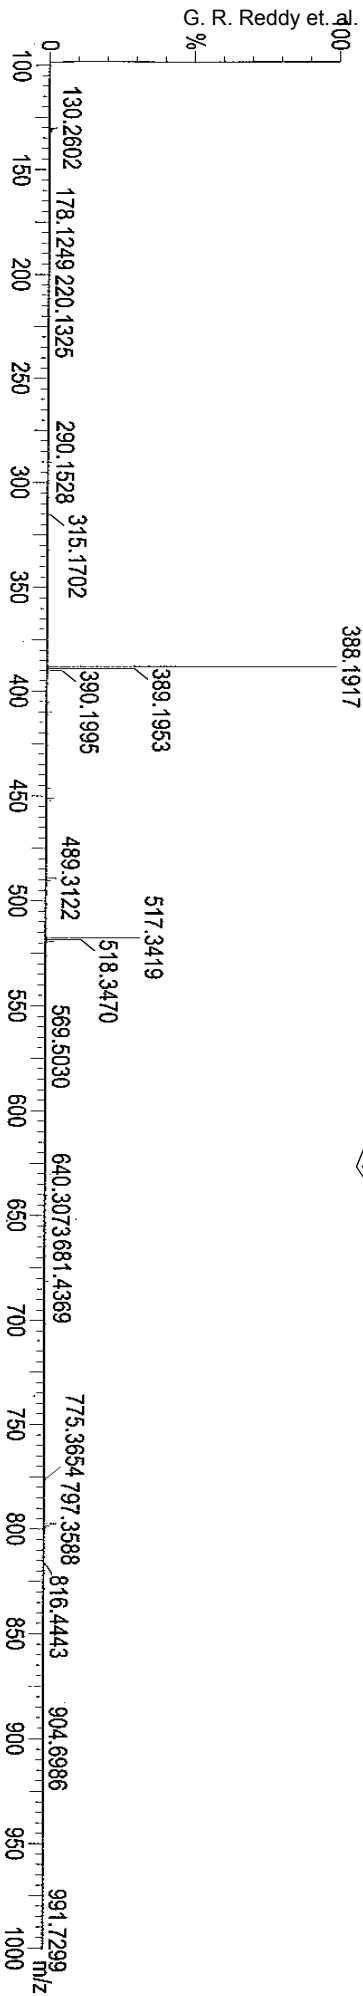

1: TOF MS ES+  
1.06e+004

Minimum: 5.0  
Maximum: 5.0  
-1.0  
80.0

| Mass     | Calc. Mass | mDa | PPM | DBE  | i-FIT | Formula      |
|----------|------------|-----|-----|------|-------|--------------|
| 388.1917 | 388.1913   | 0.4 | 1.0 | 13.5 | 2.7   | C25 H26 N O3 |

A006-CPHR-4-010 in CDCl3  
NMR-400

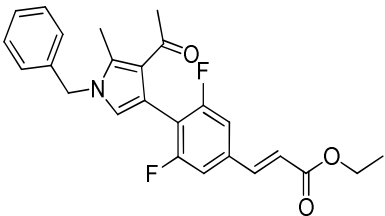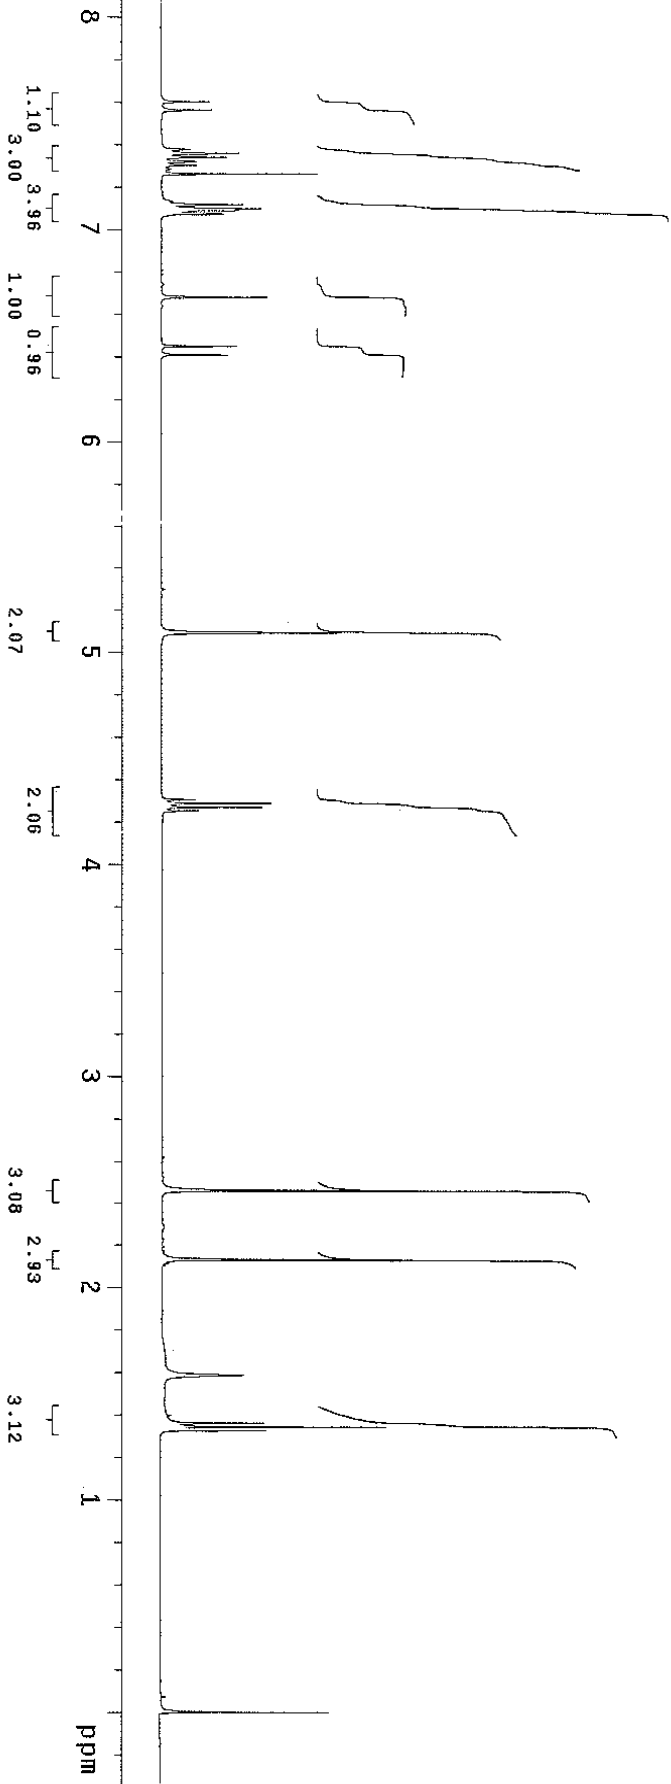

A006-CPIR-4-010 in CDCl<sub>3</sub>  
NMR-400

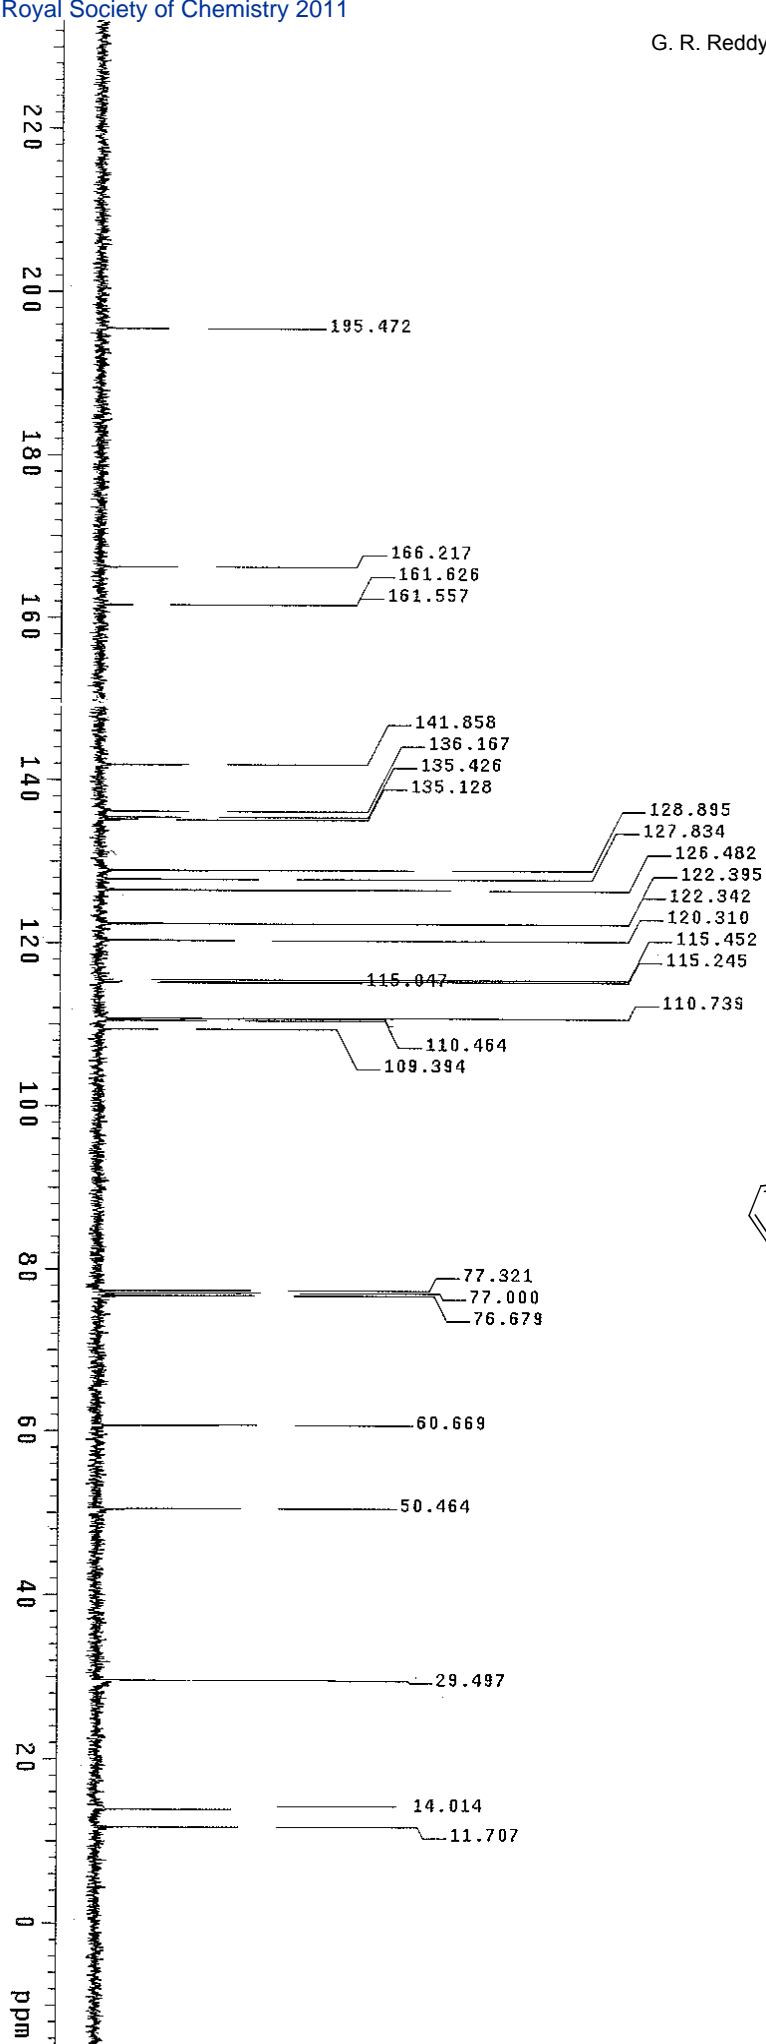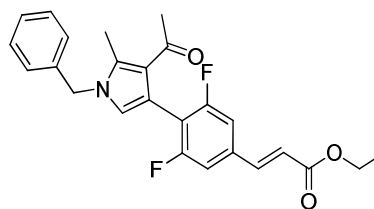

A006-CPHR4-010

UT0111\_194 25 (0.479) Cm (25:36-69:88)

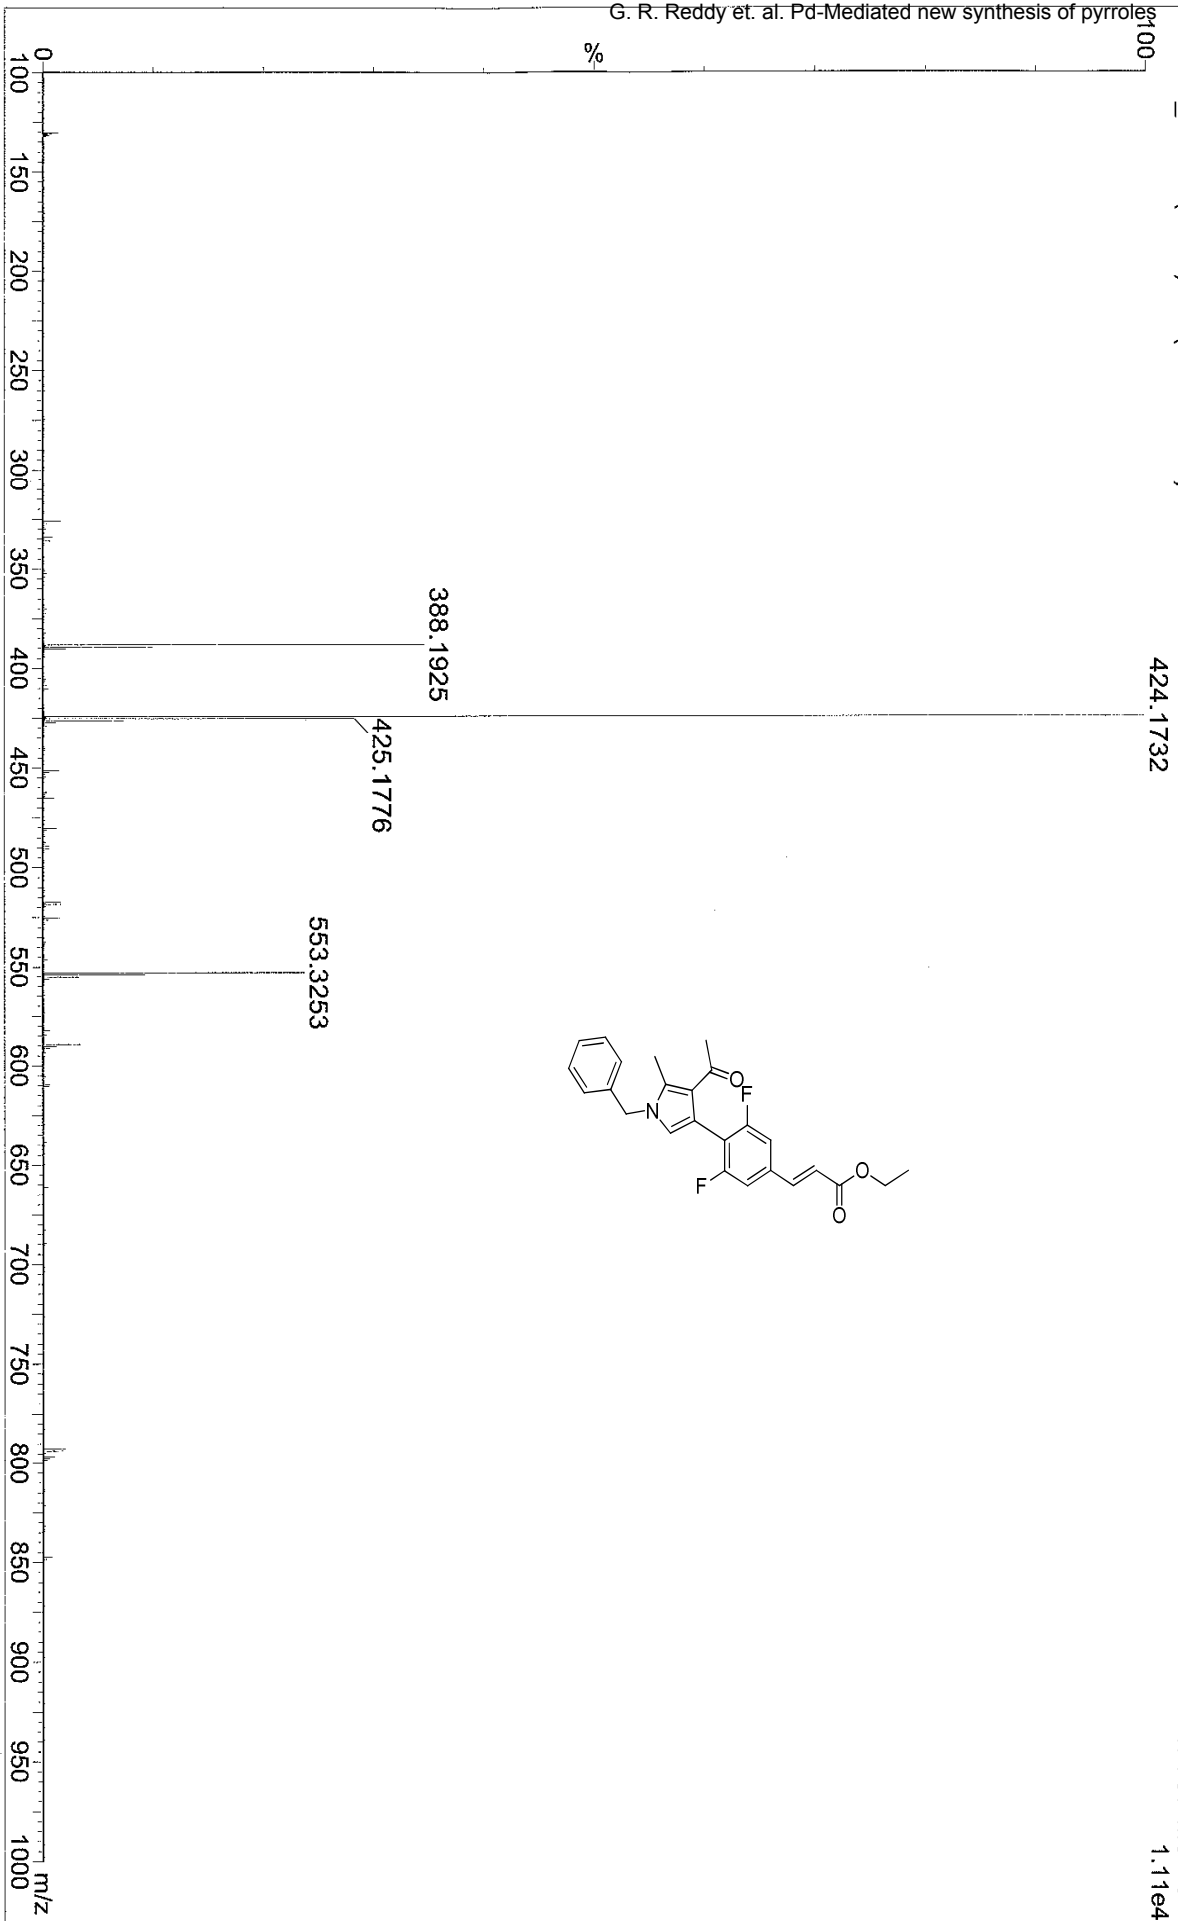

# Elemental Composition Report

## Single Mass Analysis

Tolerance = 5.0 PPM / DBE: min = -1.0, max = 80.0

Element prediction: Off

Number of isotope peaks used for i-FIT = 3

Monoisotopic Mass, Even Electron Ions

45) formula(e) evaluated with 2 results within limits (up to 4 best isotopic matches for each mass)

Elements Used:

C-0-35 H: 0-50 N: 0-4 O: 0-6 F: 0-2

AD06-CPHR4-010

U00111\_194.25 (0.479) Cm (25:36-69:88)

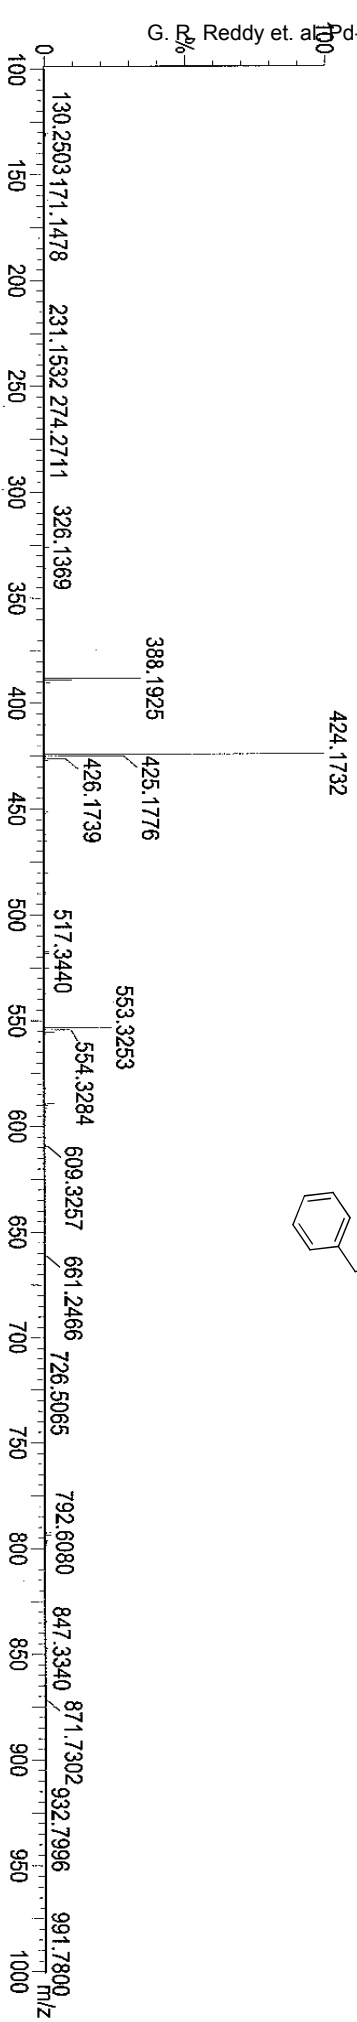

| Minimum:<br>Maximum: |            |     |     |      |       |                 |  |  |  |
|----------------------|------------|-----|-----|------|-------|-----------------|--|--|--|
| Mass                 | Calc. Mass | mDa | PPM | DBE  | i-FIT | Formula         |  |  |  |
| 424.1732             | 424.1724   | 0.8 | 1.9 | 13.5 | 58.1  | C25 H24 N O3 F2 |  |  |  |

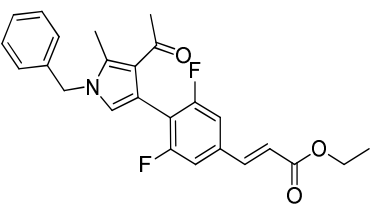

A005/CPSQ-3/001 1H CDCl3  
NMR-400

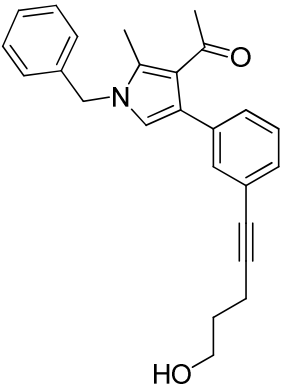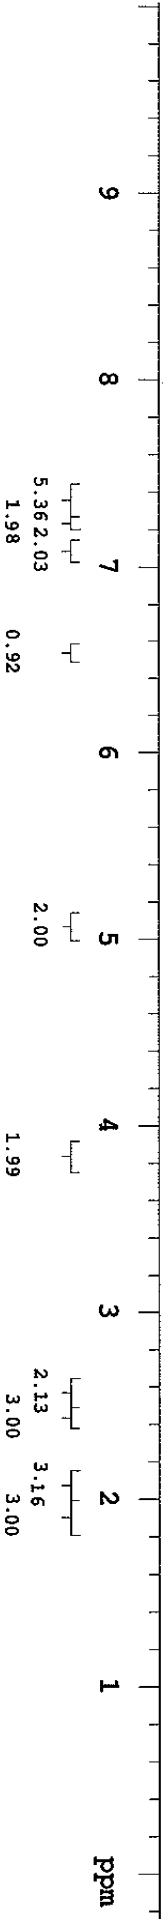

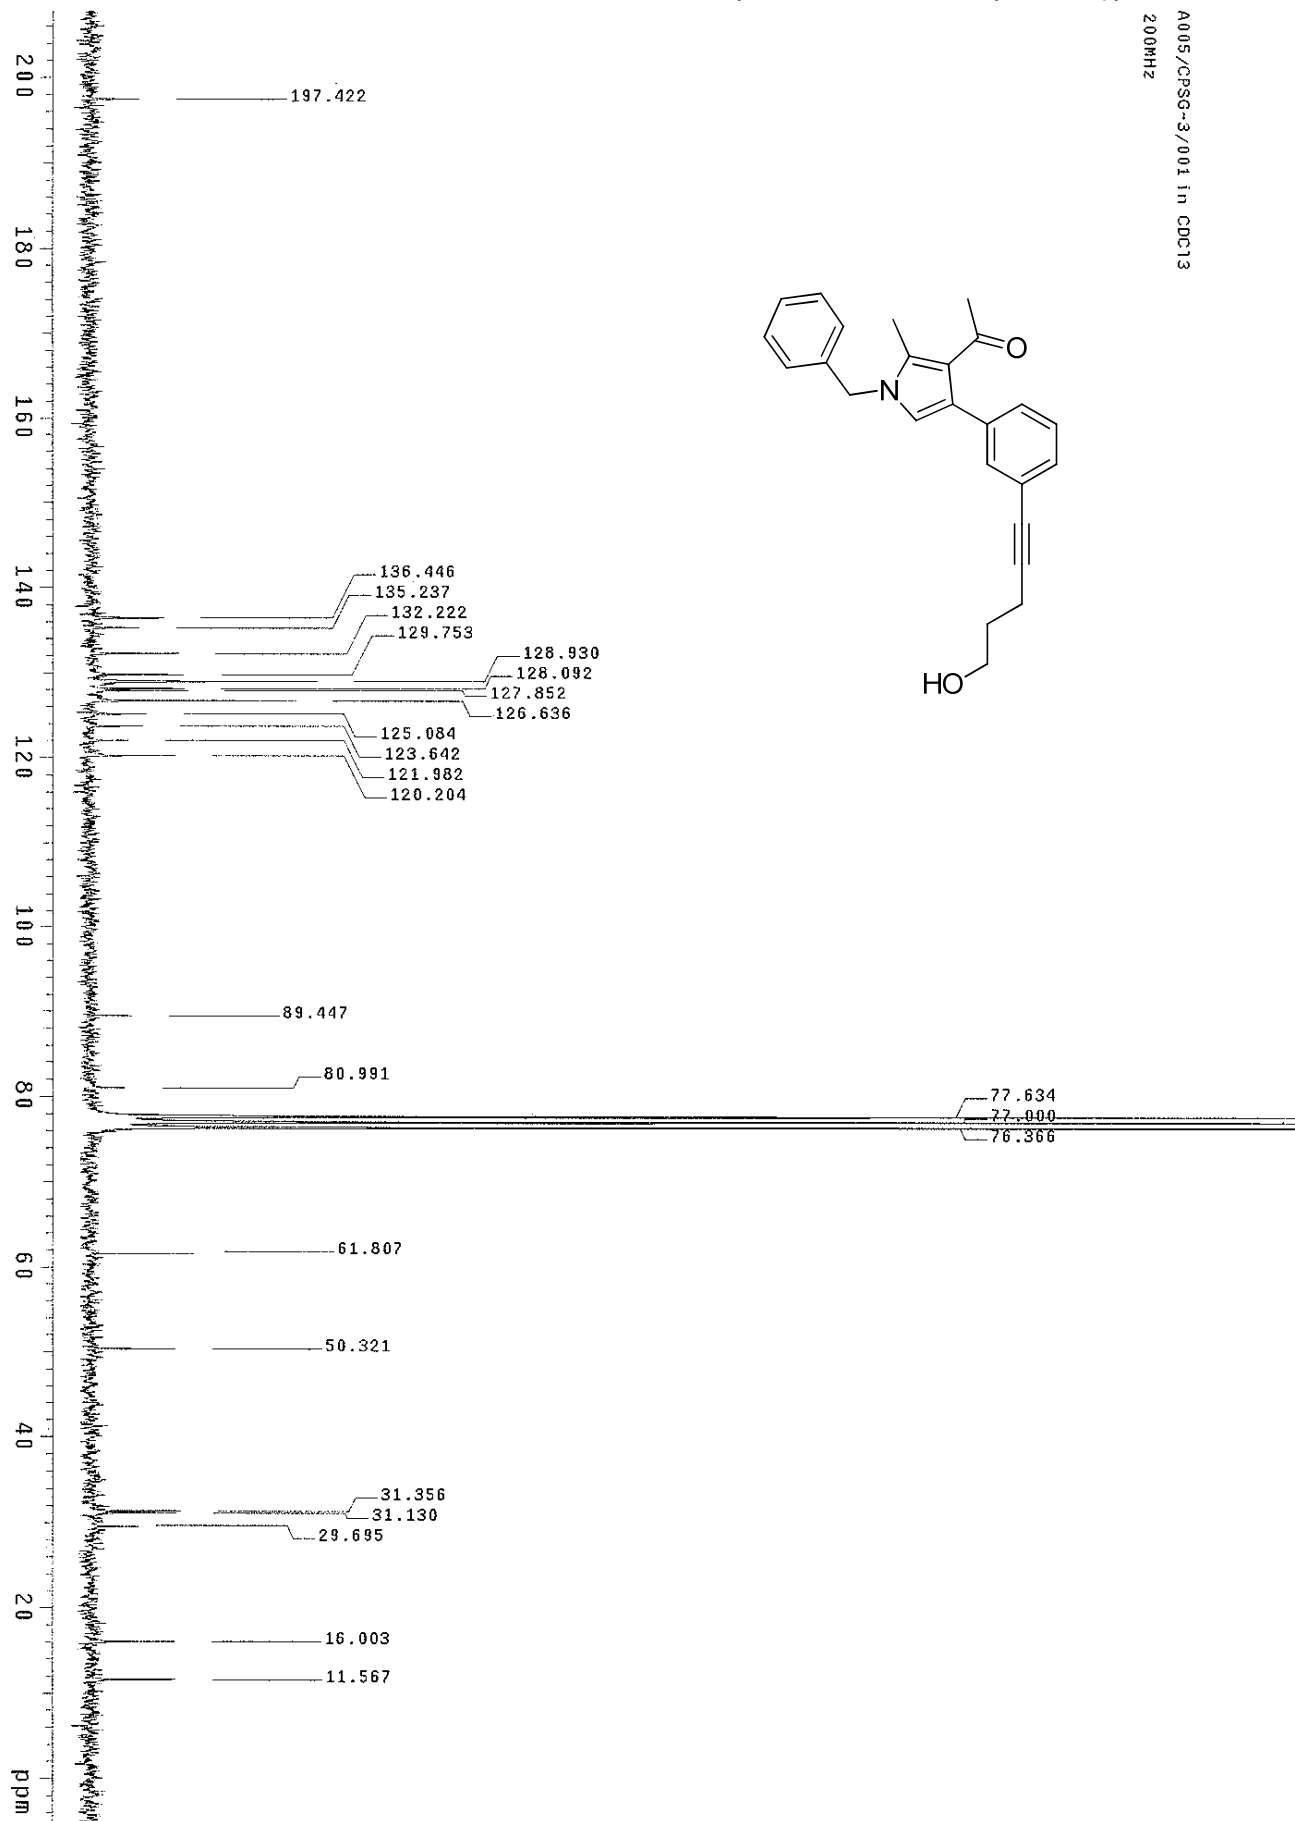

G. R. Reddy et. al. Pd-Mediated new synthesis of pyrroles

A005CPSG-3-001

UT1110\_154.25 (0.473) Cm (25:32-78:90)

1: TOF MS ES+  
3.98e3

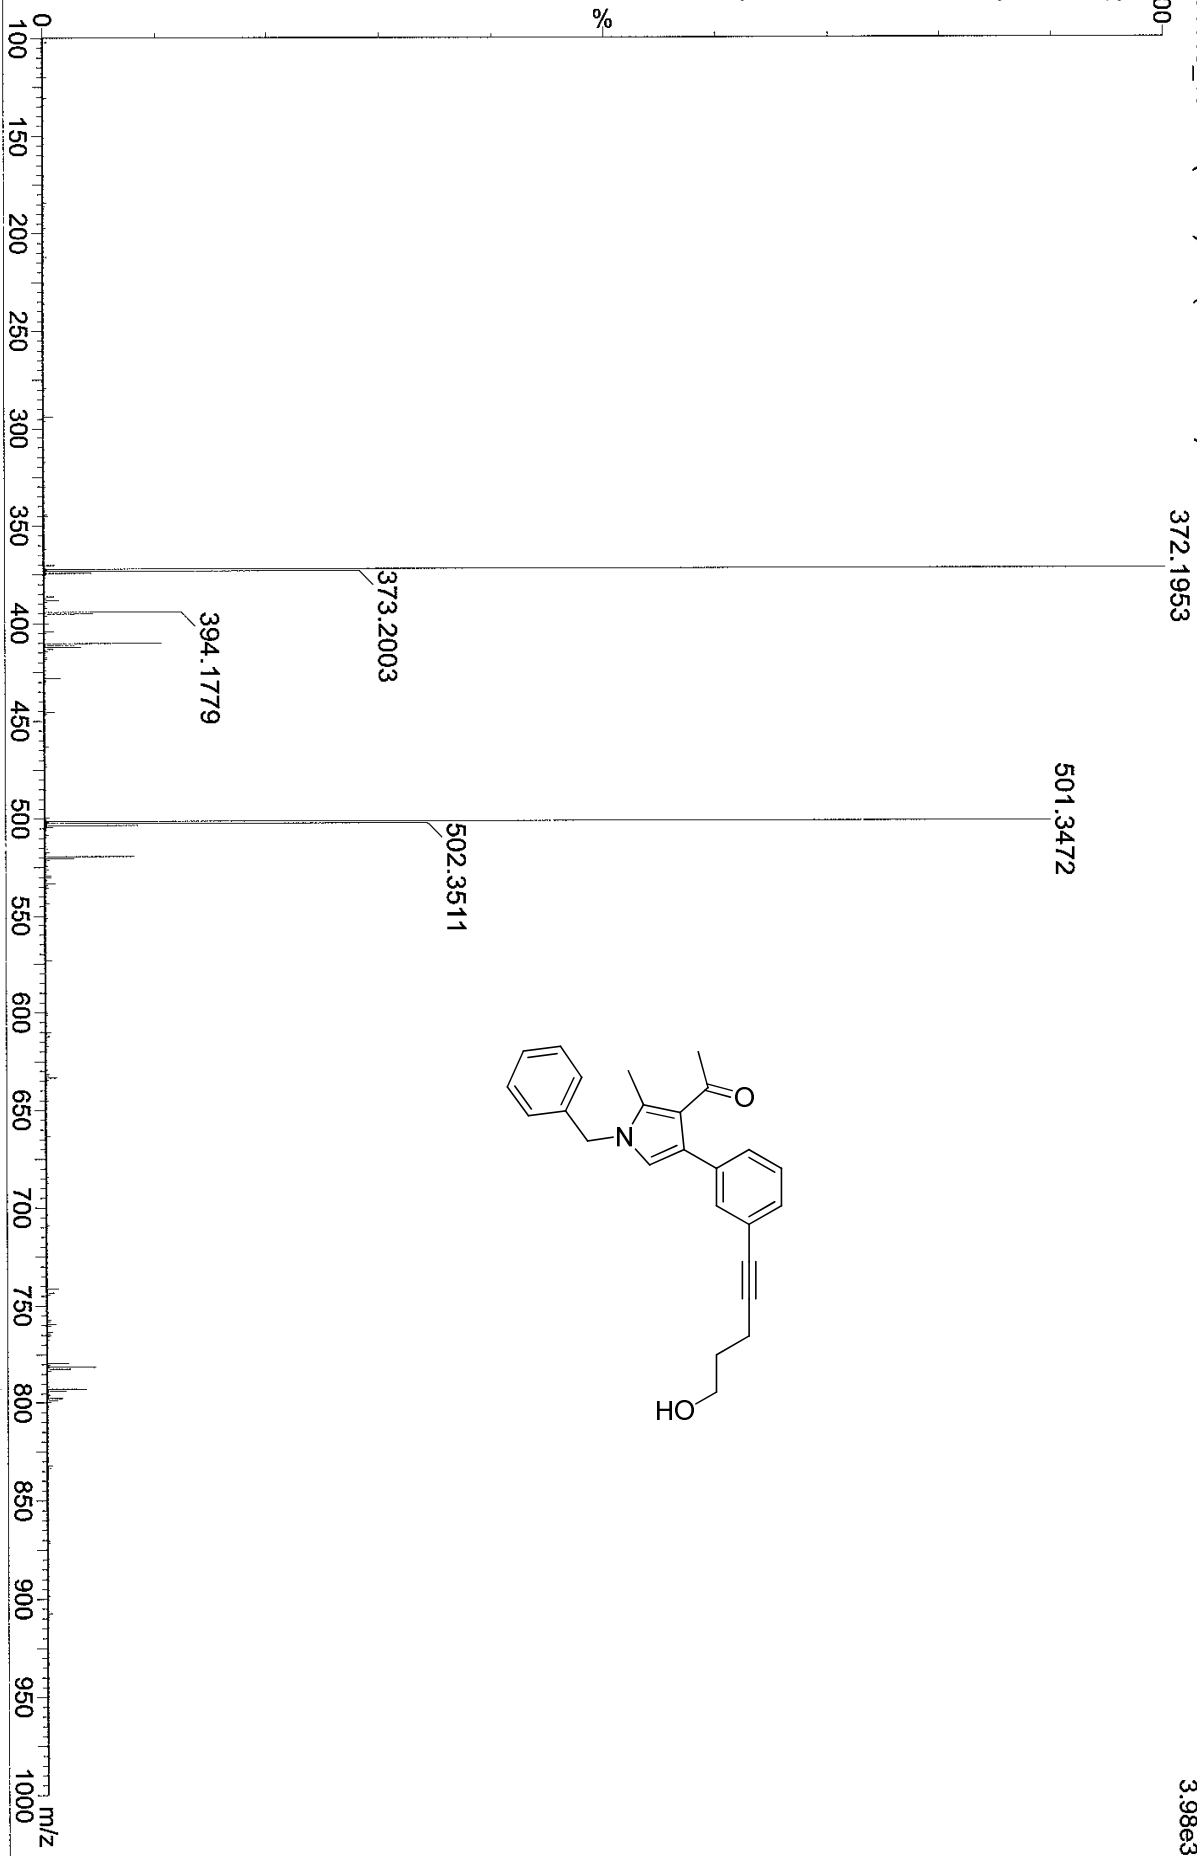



## Elemental Composition Report

### Single Mass Analysis

Tolerance = 5.0 PPM / DBE: min = -1.0, max = 80.0

Element prediction: Off

Number of isotope peaks used for i-FIT = 2

Monoisotopic Mass, Even Electron Ions

87 formula(e) evaluated with 1 results within limits (up to 4 best isotopic matches for each mass)

Elements Used:

C: 0-45 H: 0-65 N: 0-5 O: 0-2

A006(CPSG-3-001

UT1110\_154.25 (0.473) Cm (25.32-76.90)

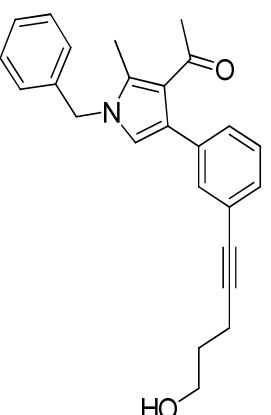

1: TOF MS ES+  
3.98e+003

G. R. Reddy et. al. Pd-Mediated new synthesis of pyrroles

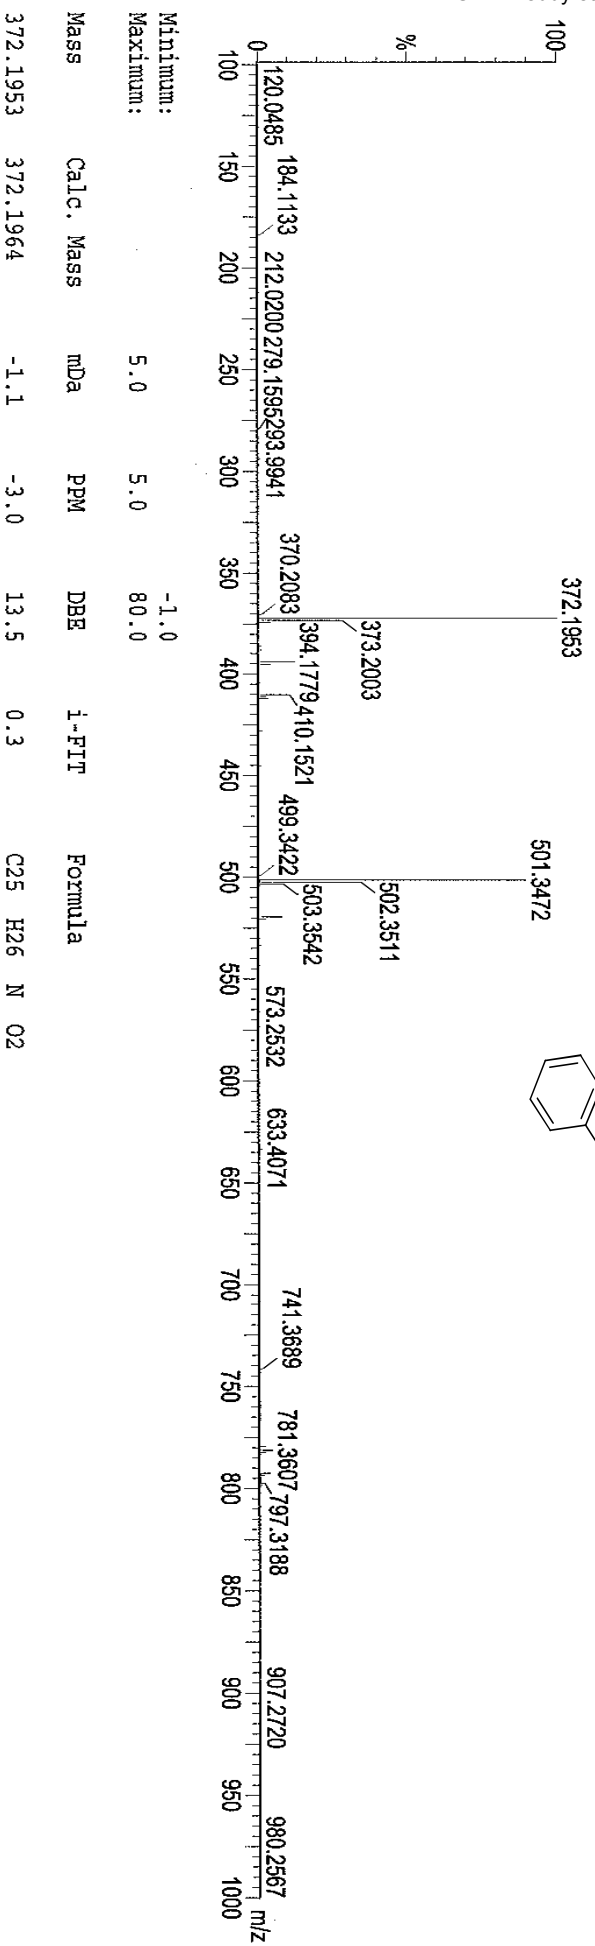

Minimum: -1.0  
Maximum: 80.0

| Mass     | Calc. Mass | mDa  | PPM  | DBE  | i-FIT | Formula      |
|----------|------------|------|------|------|-------|--------------|
| 372.1953 | 372.1964   | -1.1 | -3.0 | 13.5 | 0.3   | C25 H26 N O2 |

A005-CPSC-3-002 in CDCl3  
NMR-400

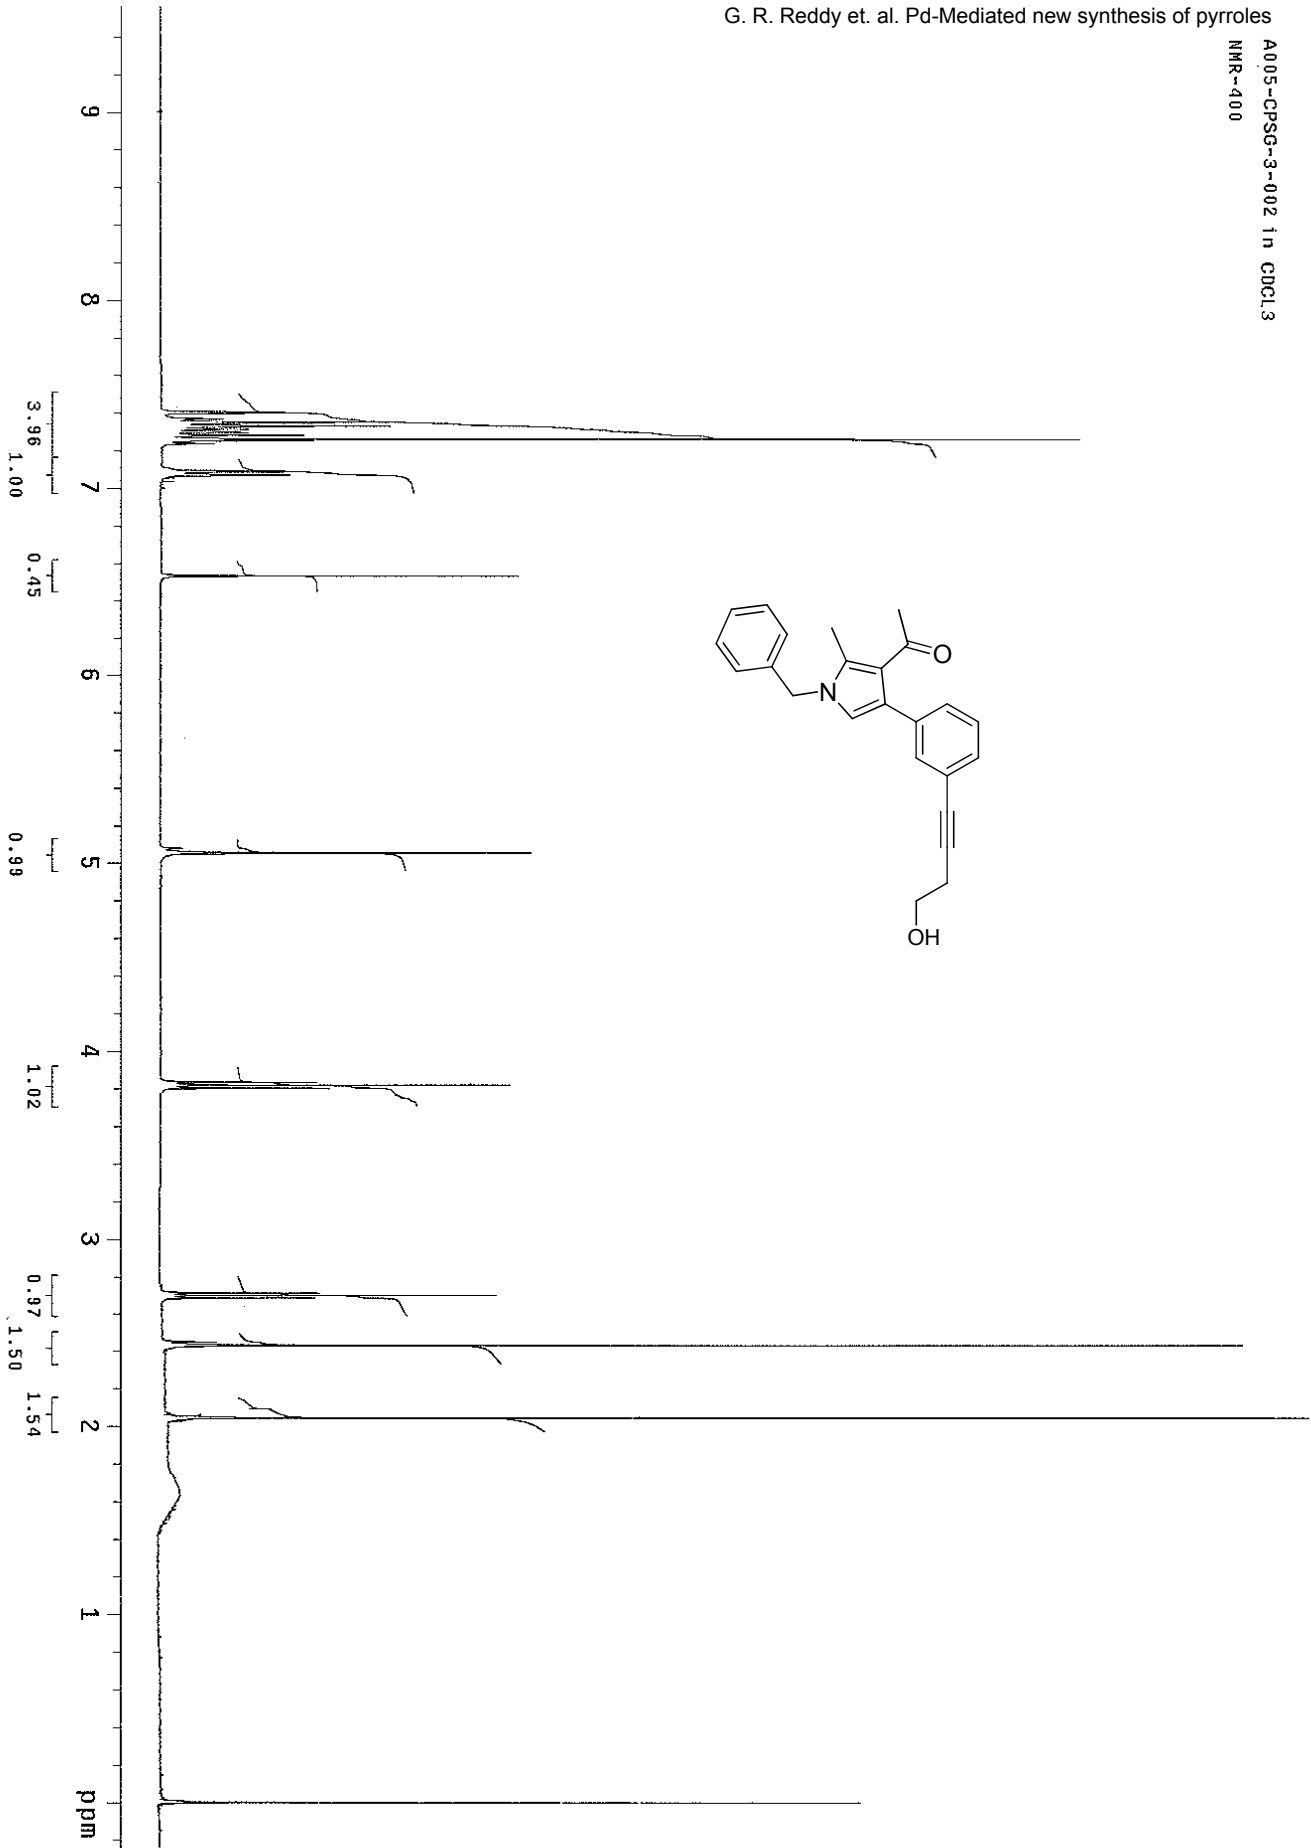

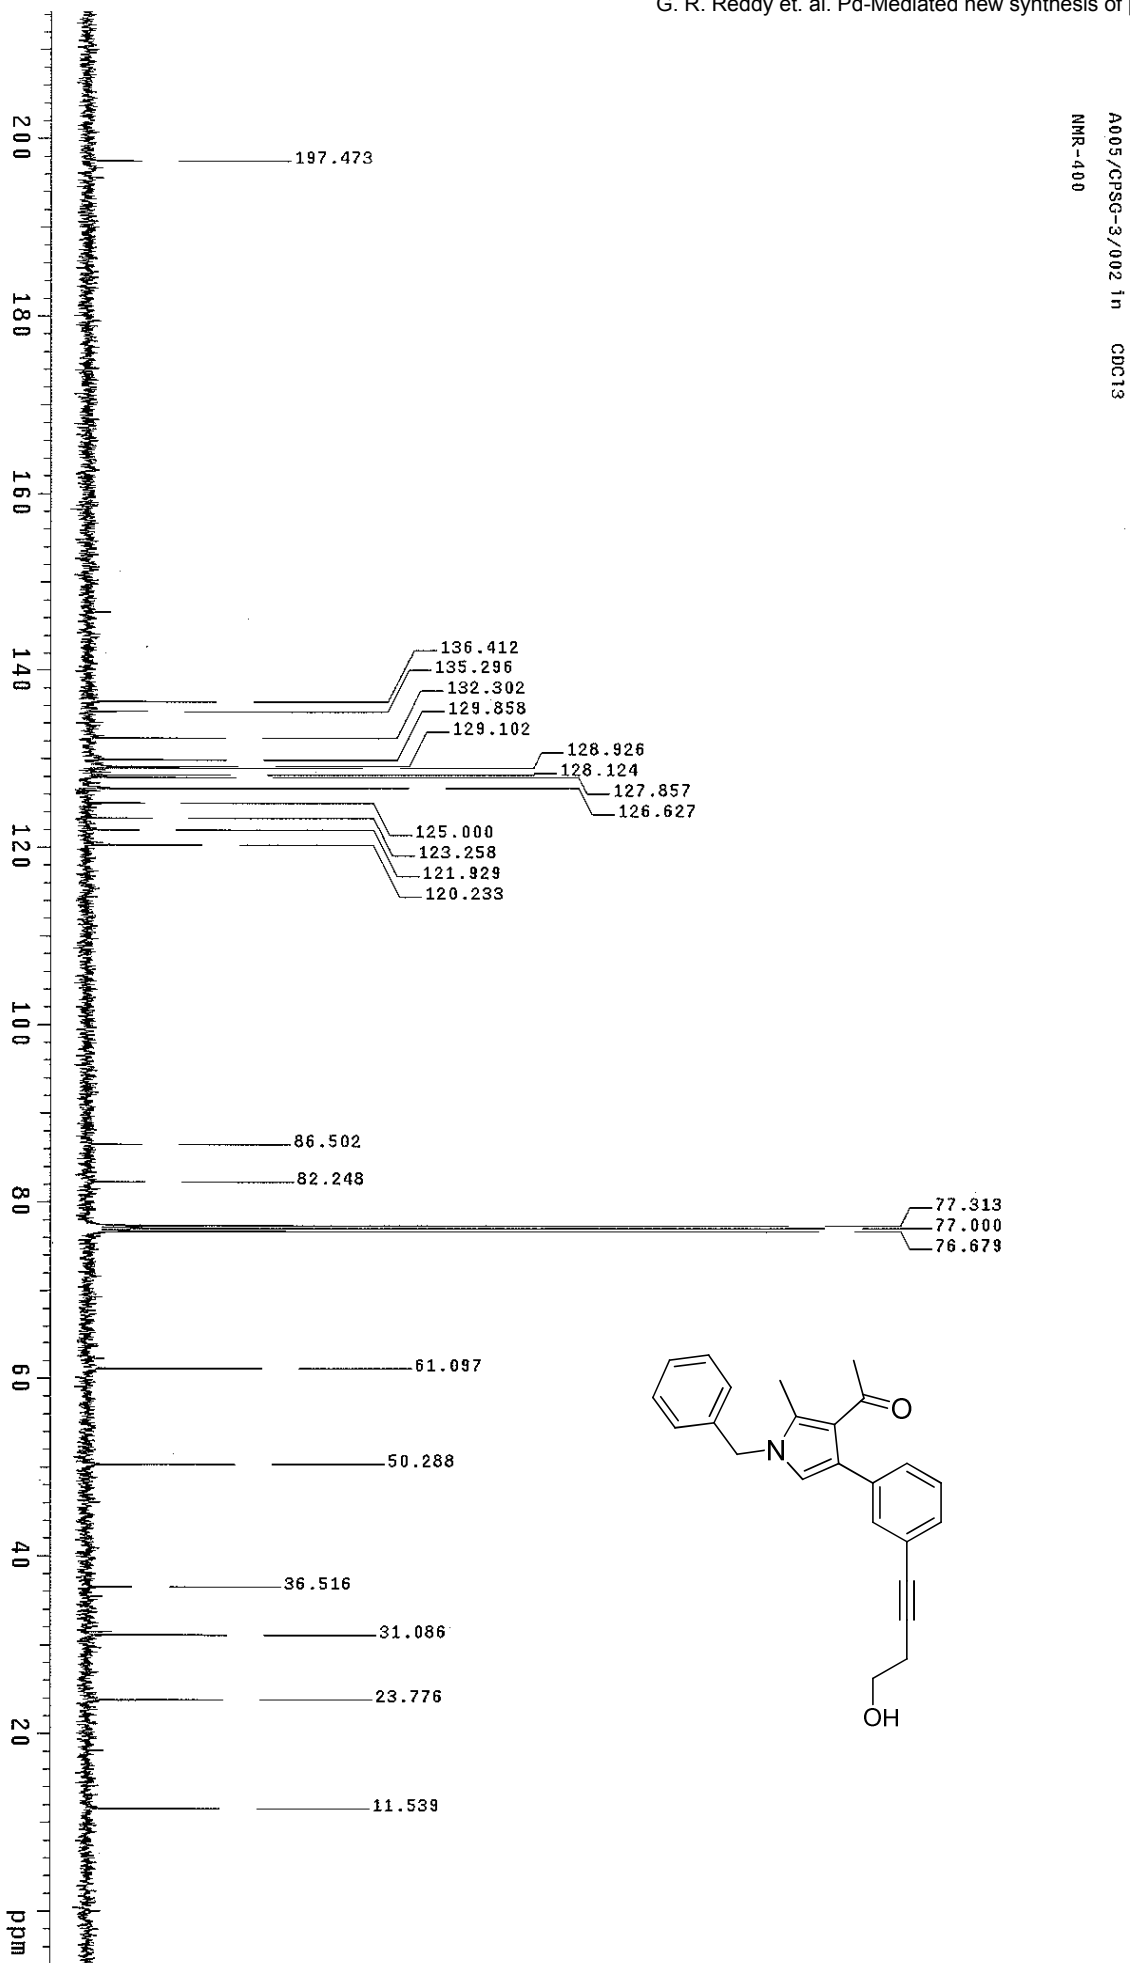

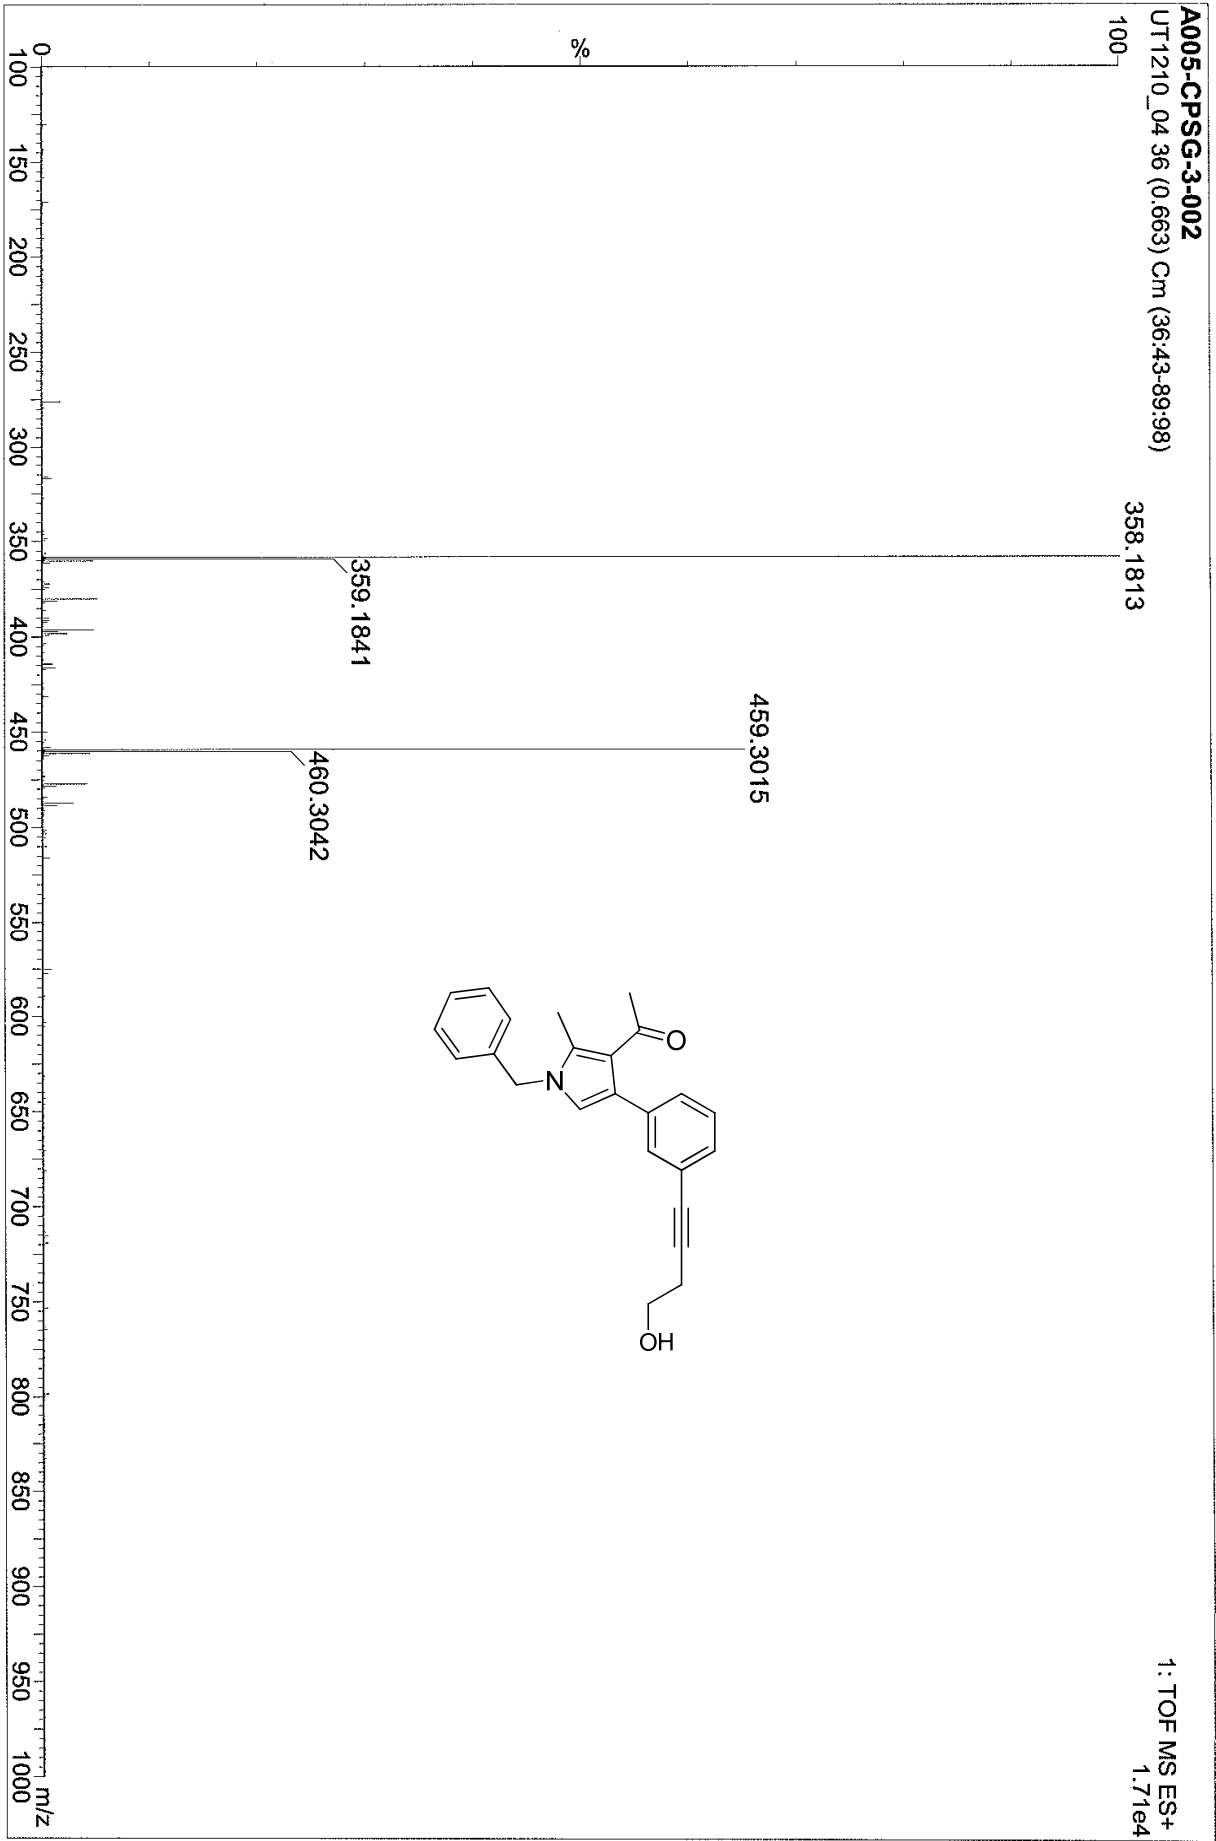

## Elemental Composition Report

### Single Mass Analysis

Tolerance = 10.0 PPM / DBE: min = -1.0, max = 80.0

Element prediction: Off

Number of isotope peaks used for i-FIT = 3

Monoisotopic Mass, Even Electron Ions

89 formula(e) evaluated with 1 results within limits (up to 4 best isotopic matches for each mass)

Elements Used:

C: 0-40 H: 0-55 N: 0-3 O: 0-4

A005-CPSG-3-002

UT1210\_04 36 (0.663) Cm (36:43-89:98)

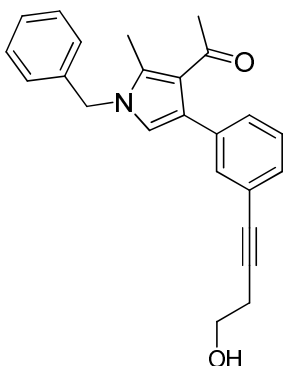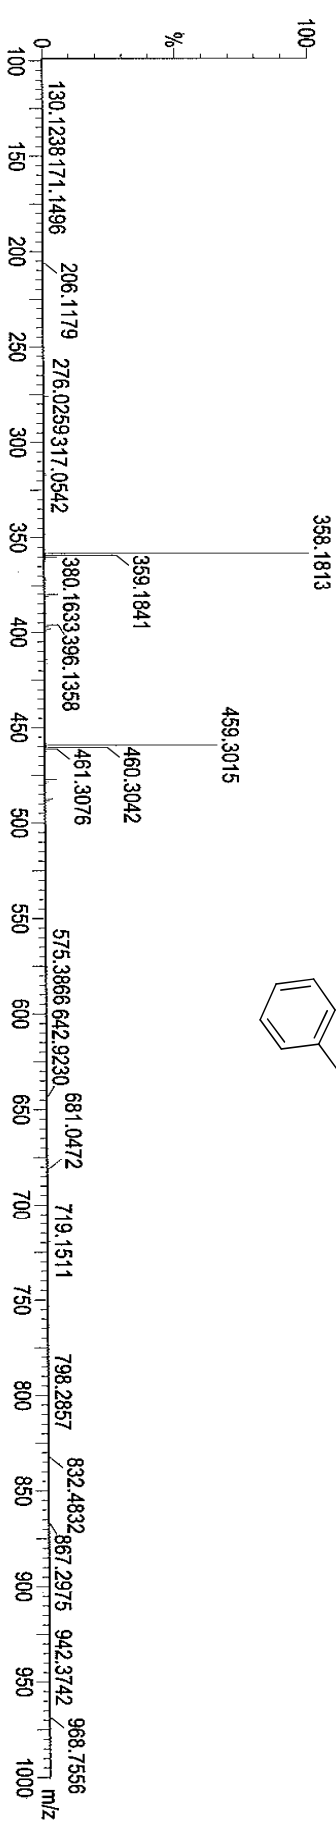

Minimum: 5.0  
Maximum: 10.0  
DBE: -1.0  
i-FIT: 80.0

| Mass     | Calc. Mass | mDa | PPM | DBE  | i-FIT | Formula                                                       |
|----------|------------|-----|-----|------|-------|---------------------------------------------------------------|
| 358.1813 | 358.1807   | 0.6 | 1.7 | 13.5 | 10.4  | C <sub>24</sub> H <sub>24</sub> N <sub>2</sub> O <sub>2</sub> |

2005/CPSG-3/003 in CDCl3  
NMR-400

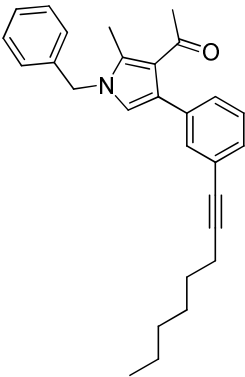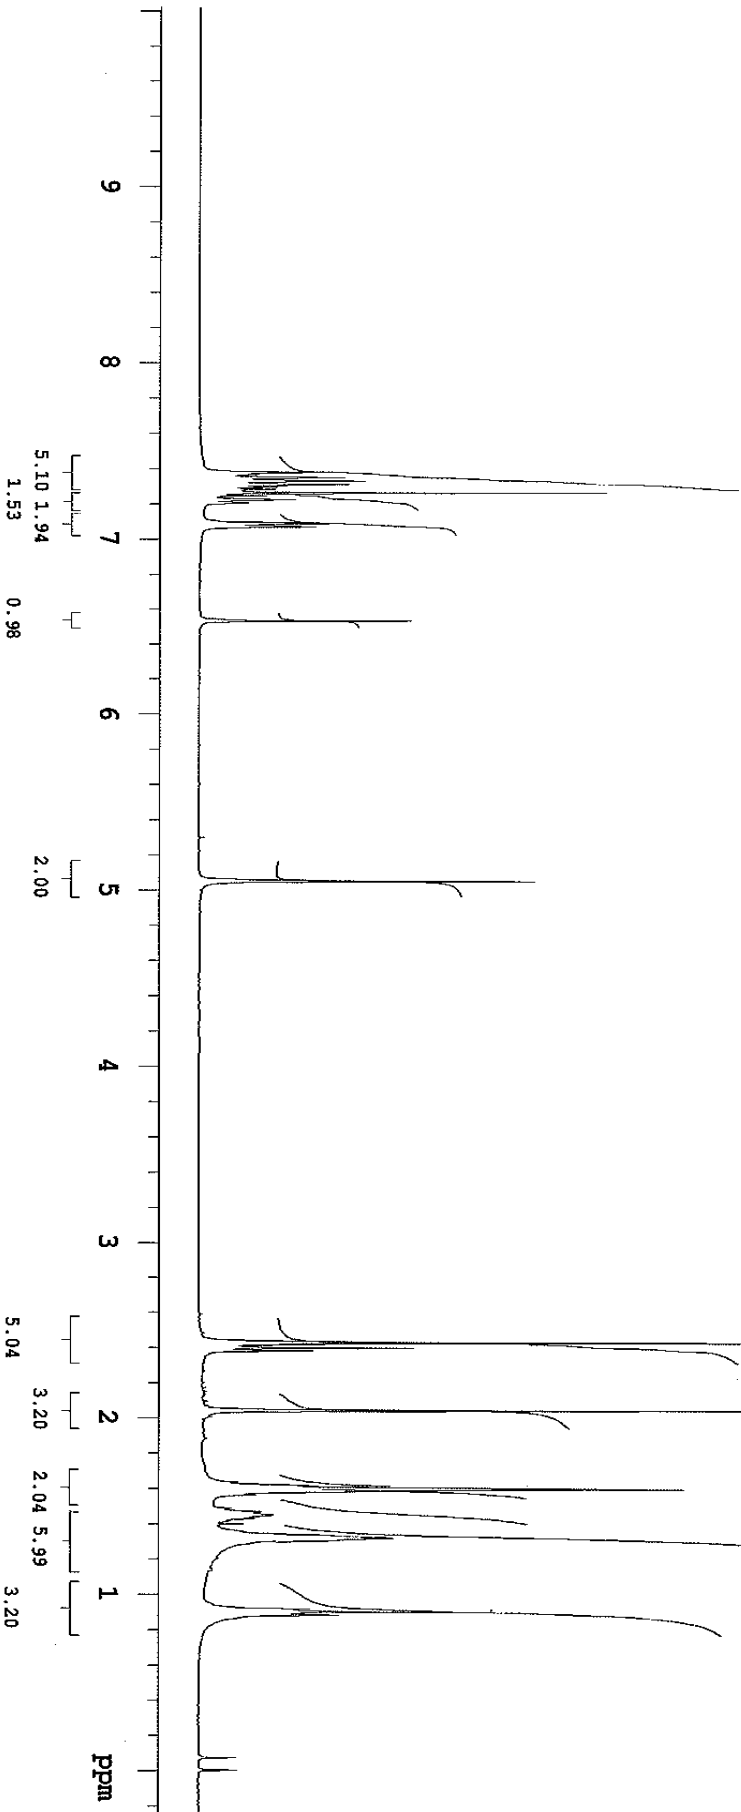

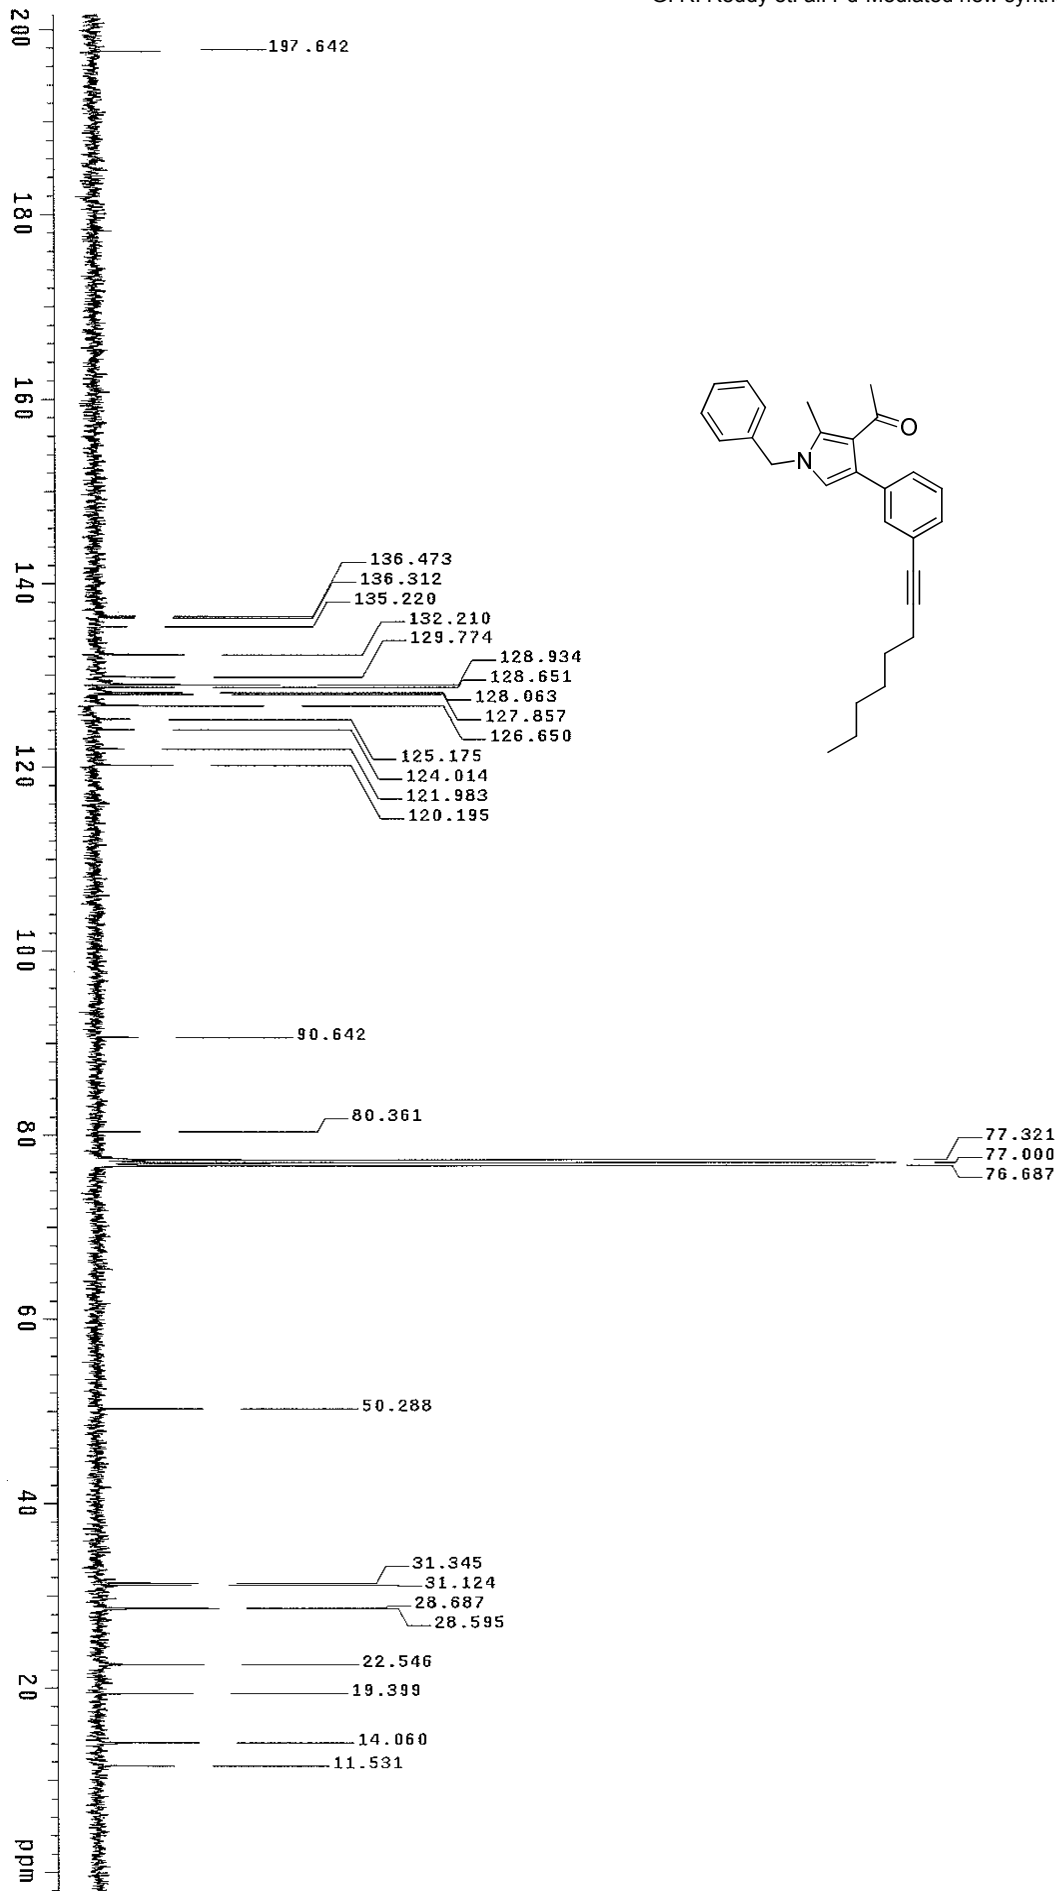

A005/CPS6-3/003 in CDCl3  
NMR-400

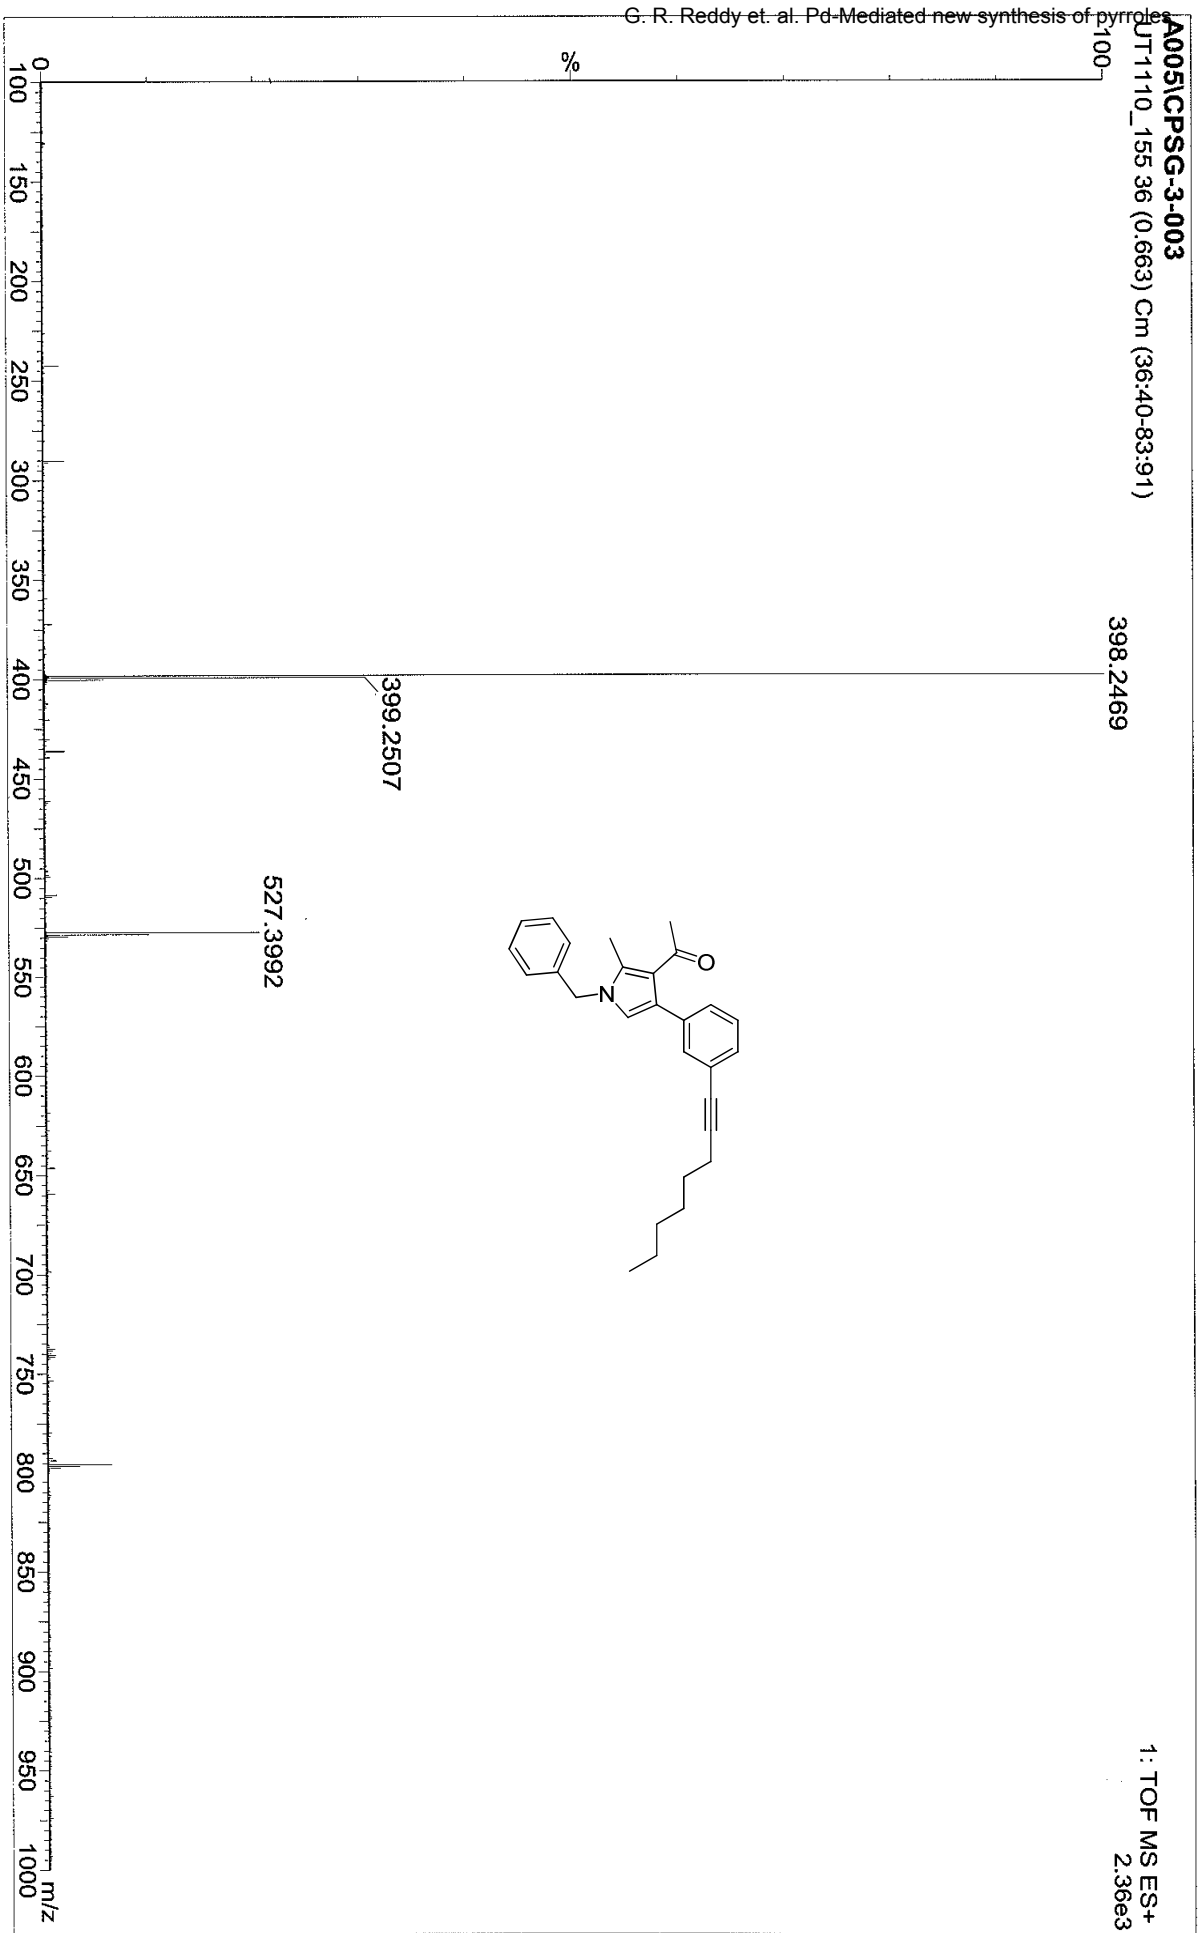

G. R. Reddy et. al. Pd-Mediated new synthesis of pyrroles



## Elemental Composition Report

### Single Mass Analysis

Tolerance = 5.0 PPM / DBE: min = -1.0, max = 80.0

Element prediction: Off

Number of isotope peaks used for i-FIT = 2

Monoisotopic Mass, Even Electron Ions

93 formula(e) evaluated with 1 results within limits (up to 4 best isotopic matches for each mass)

Elements Used:

C: 0-45 H: 0-65 N: 0-5 O: 0-2

4005(CPSG-3-003

11110\_155 36 (0.663) Cm (36.40-83.91)

398.2469

1: TOF MS ES+  
2.36e+003

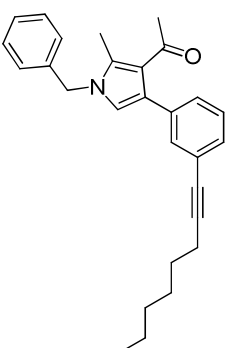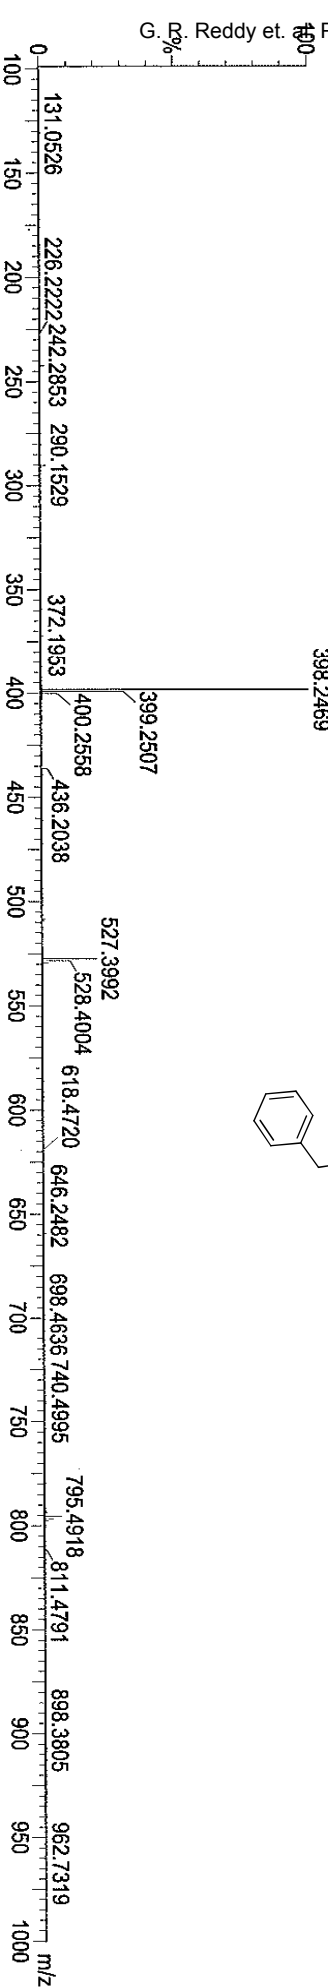

Minimum: 5.0  
Maximum: 5.0  
-1.0  
80.0

| Mass     | Calc. Mass | mDa  | PPM  | DBE  | i-FIT | Formula     |
|----------|------------|------|------|------|-------|-------------|
| 398.2469 | 398.2484   | -1.5 | -3.8 | 13.5 | 0.9   | C28 H32 N O |

A005/CESG-3/004 in CDCl3  
NMR-400

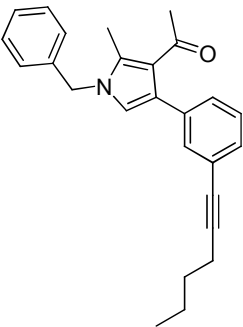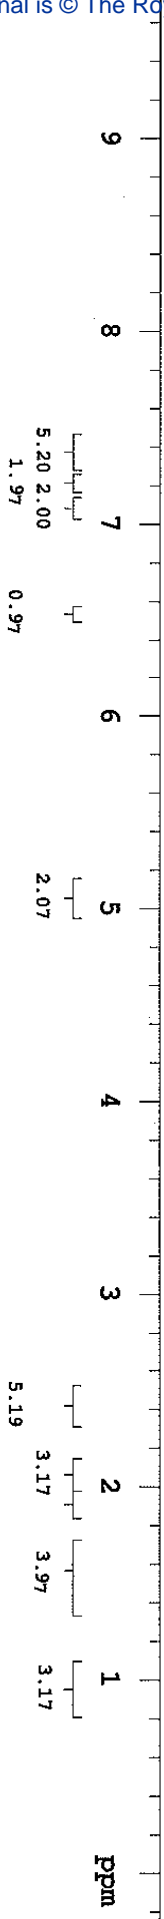

A005/CPSG-3/004 in CDCl3  
NMR-400

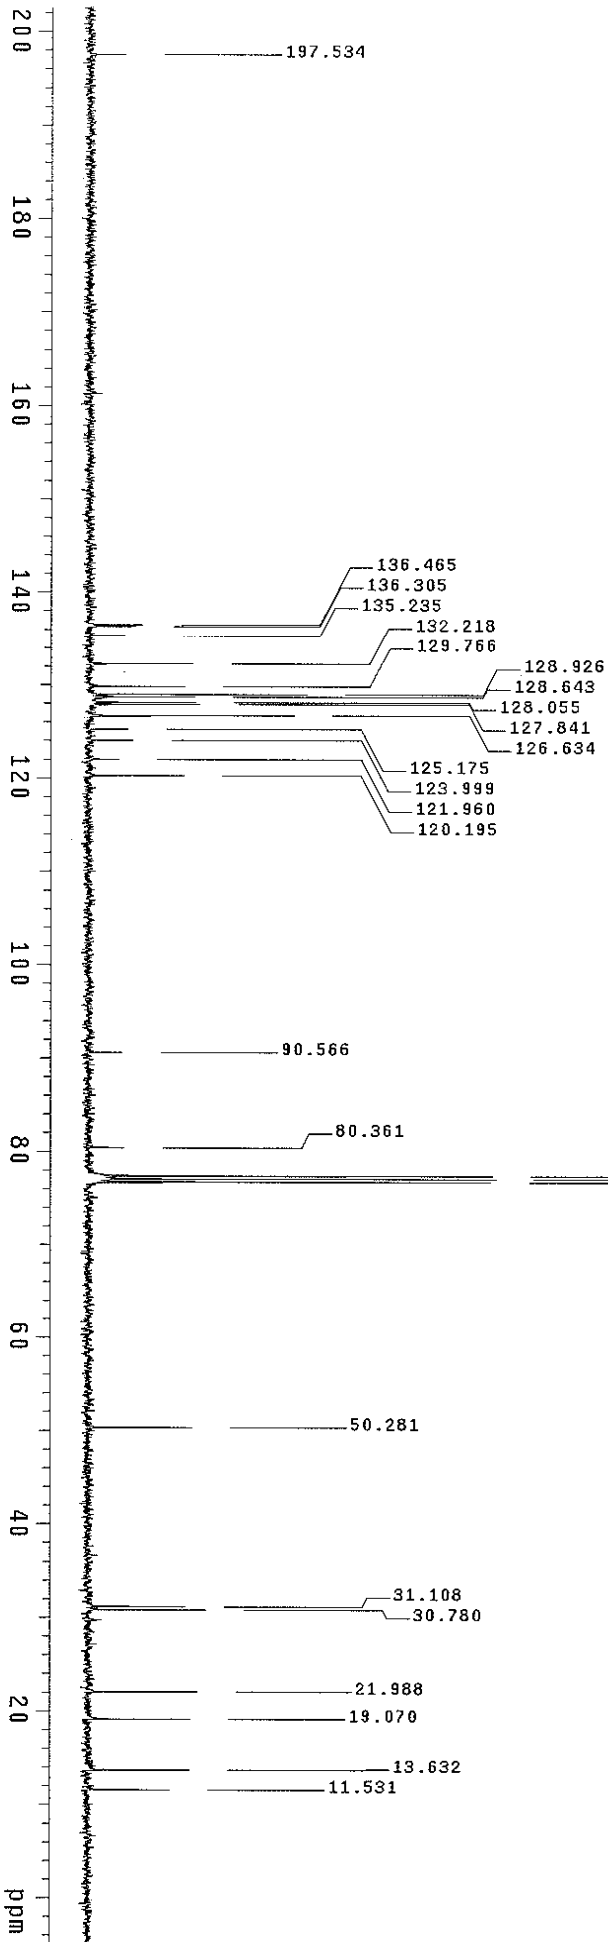

G. R. Reddy et. al. Pd-Mediated new synthesis of pyrrole

A005\CPSC-3-004

UT11110\_152 30 (0.562) Cm (30:36-74:86)

370.2160

1: TOF MS ES+  
4.93e3

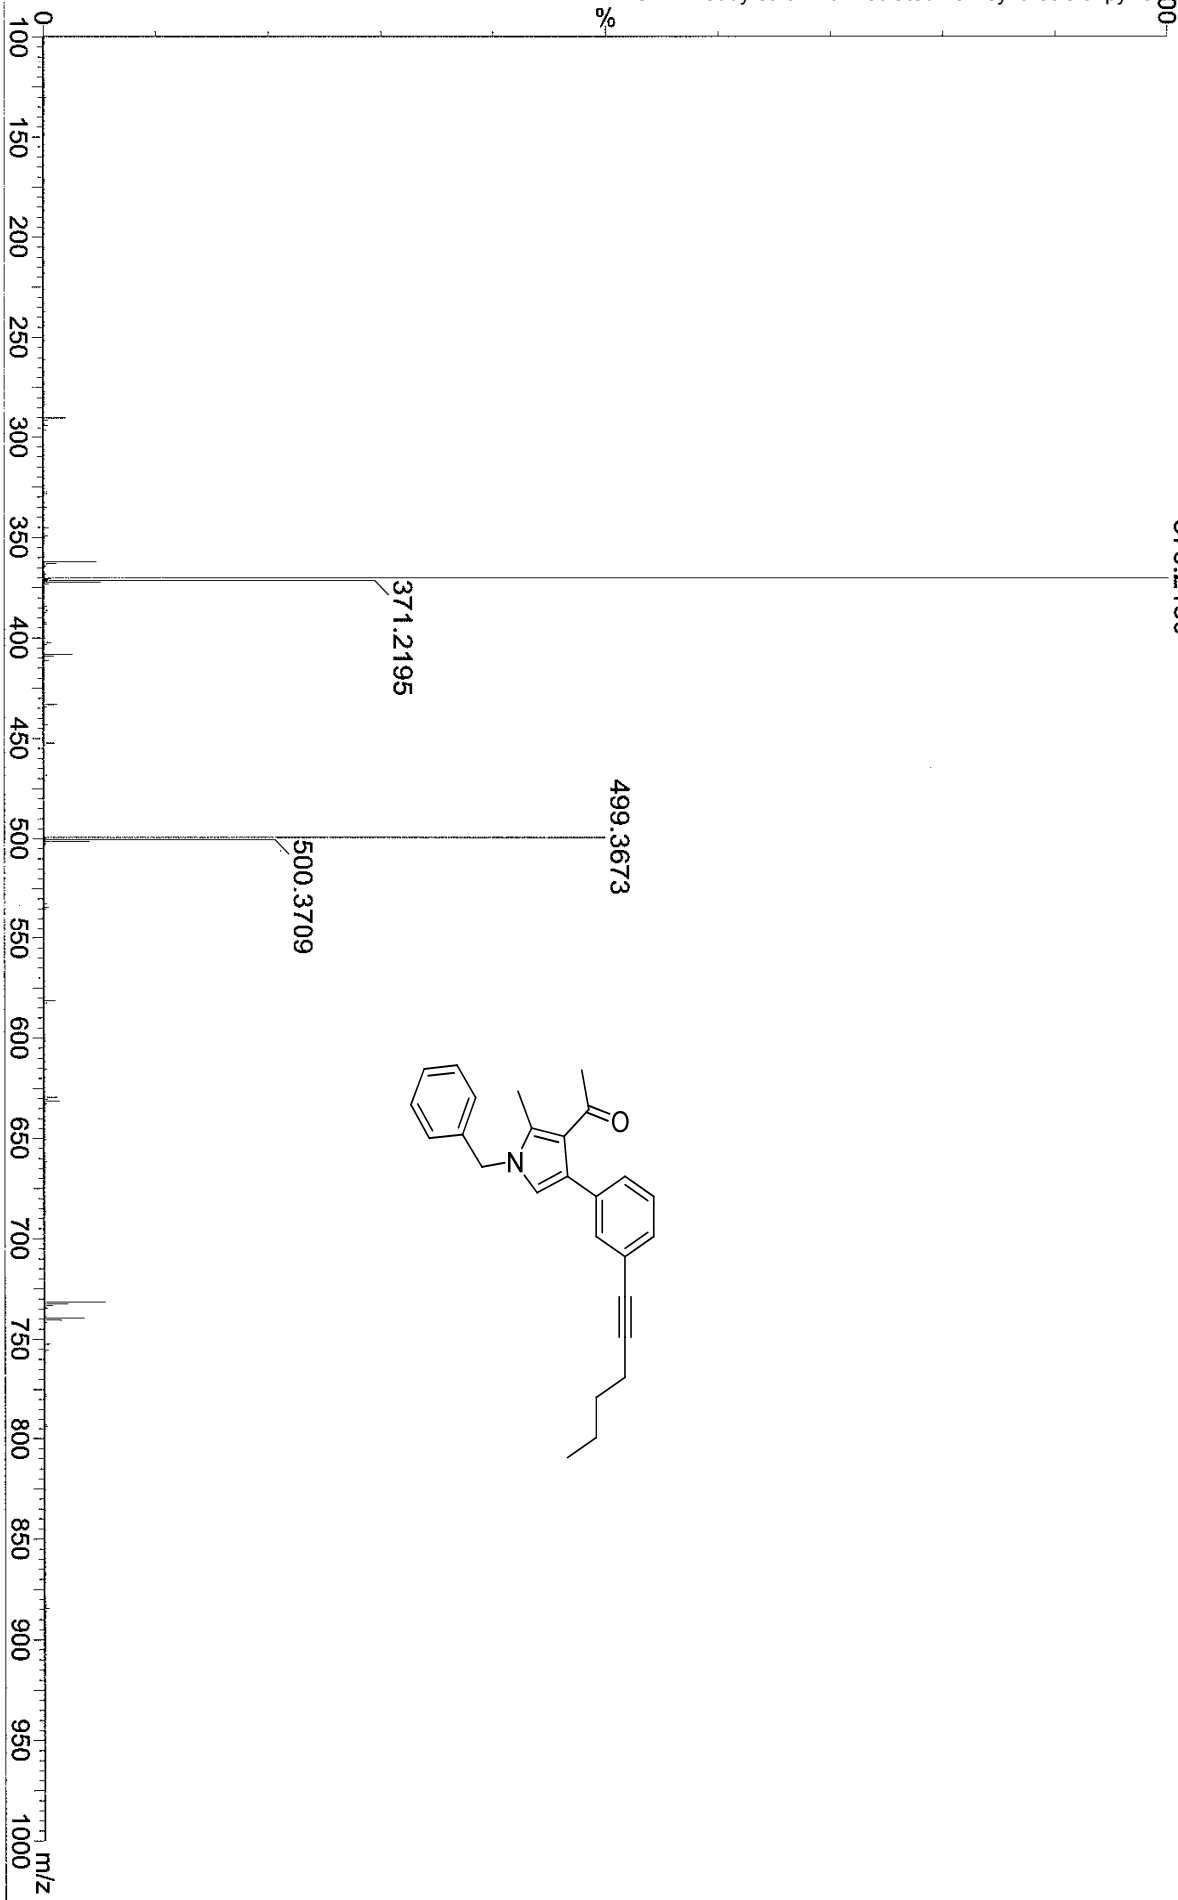

Element prediction: Off

Number of isotope peaks used for i-FIT = 2

### Monoisotopic Mass, Even Electron Ions

85 formulate(e) evaluated with 1 results within limits (up to 4 best isotopic matches for each mass)

Elements Used:

Q<sub>u</sub> 0-45 H: 0-65 N: 0-5 O: 0-2

AP05\CP SG-3-004

IR 1110-15230 (0.562) Cm (30:36-74:86)

1:TOF MS ES+  
4.93e+003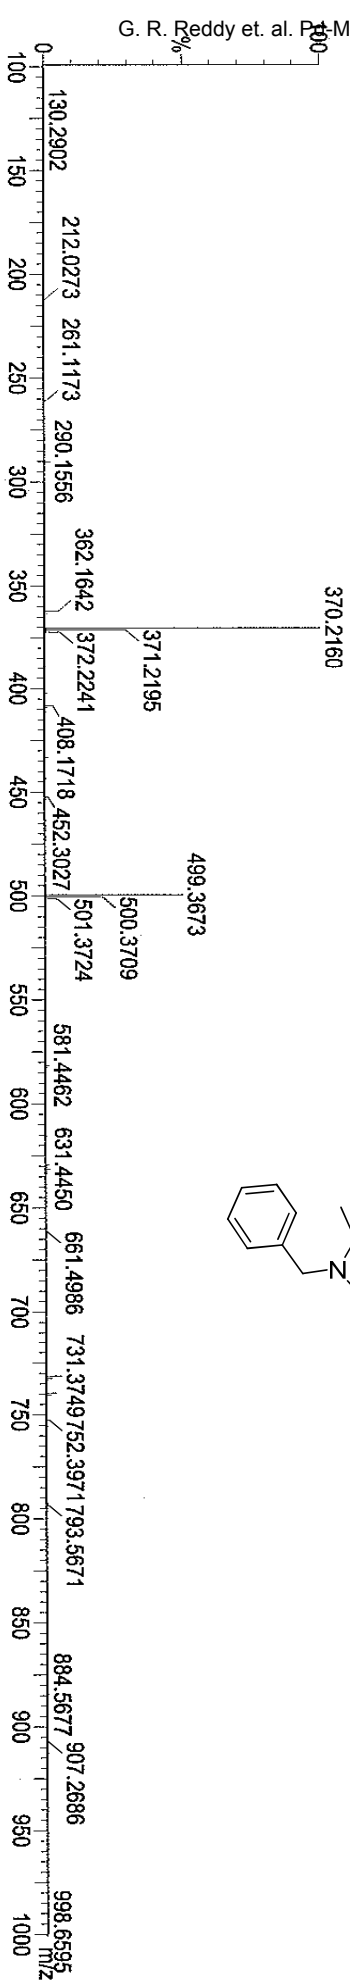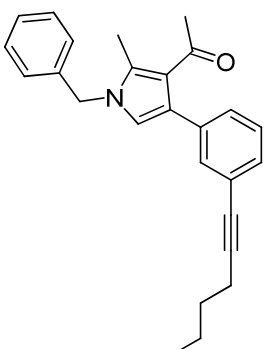

|          |            |      |      |      |       |             |  |
|----------|------------|------|------|------|-------|-------------|--|
| Minimum: |            |      |      | -1.0 |       |             |  |
| Maximum: |            |      | 5.0  | 10.0 | 80.0  |             |  |
| Mass     | Calc. Mass | mDa  | PPM  | DBE  | i-FTT | Formula     |  |
| 370.2160 | 370.2171   | -1.1 | -3.0 | 13.5 | 0.2   | C26 H28 N O |  |

A005/CPSG-3/005 1n CDCl3  
NMR-400

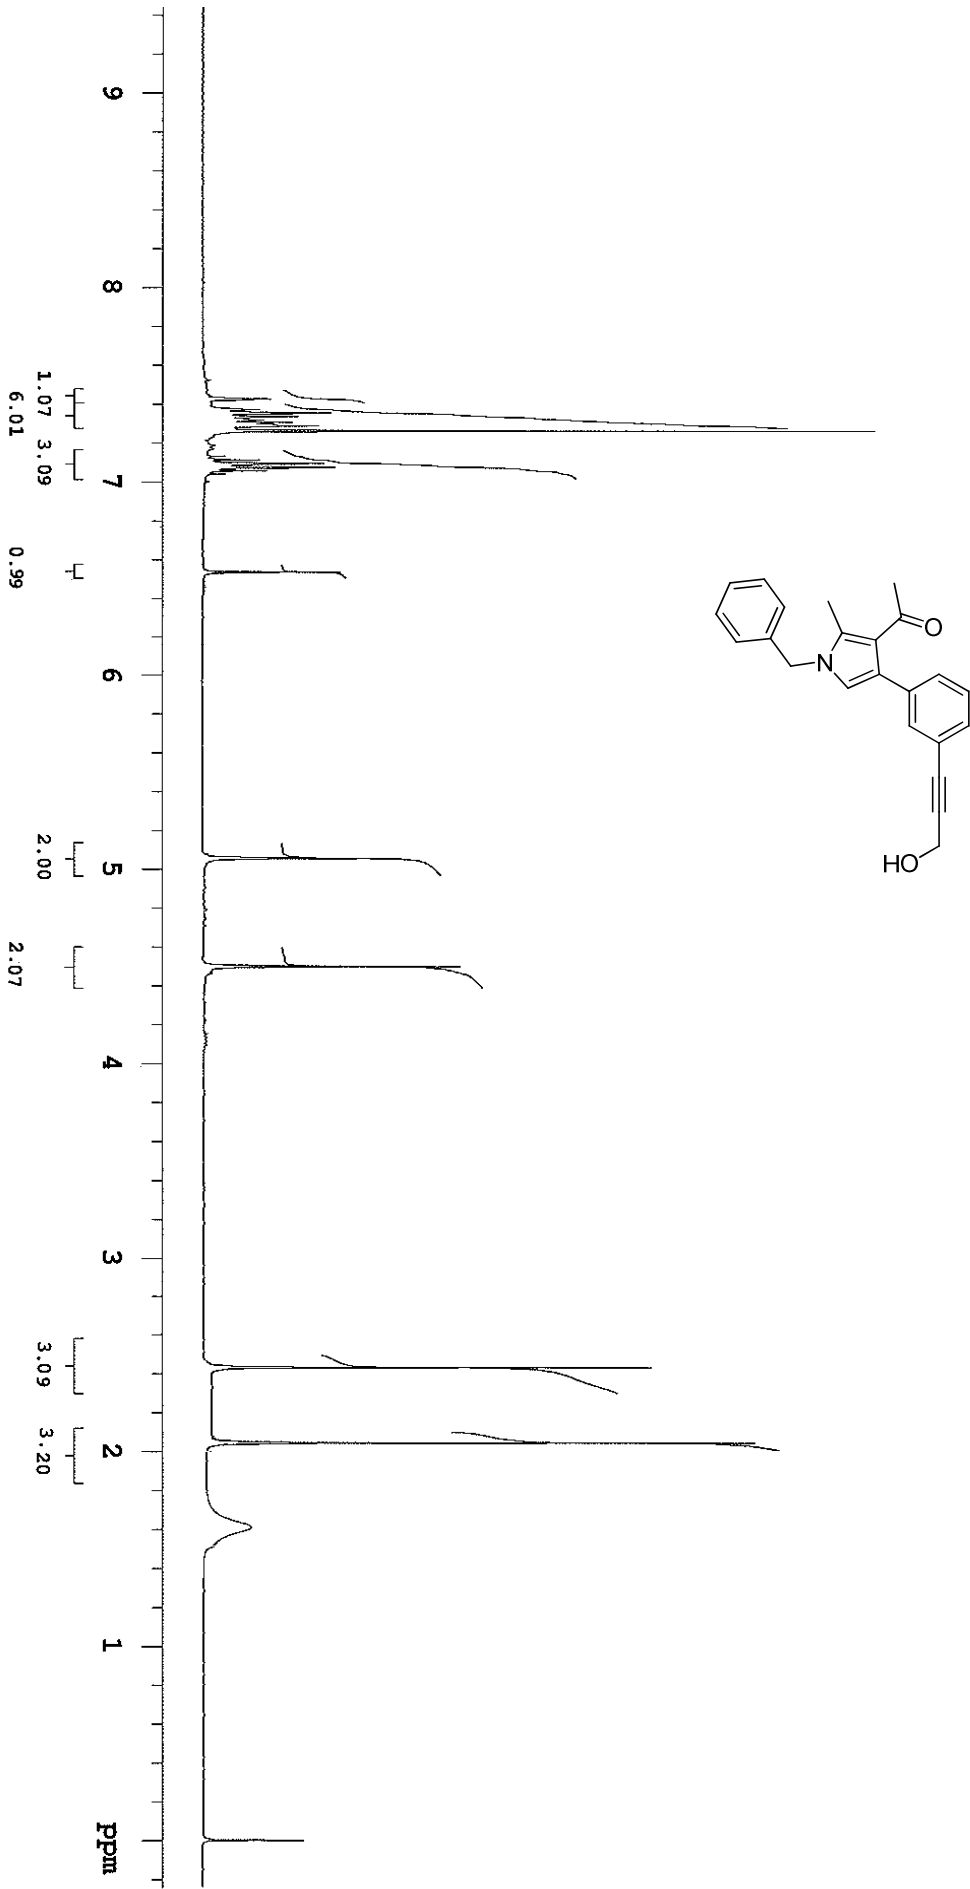

A005-CPSG3-005 in CDCl<sub>3</sub>  
NMR-400

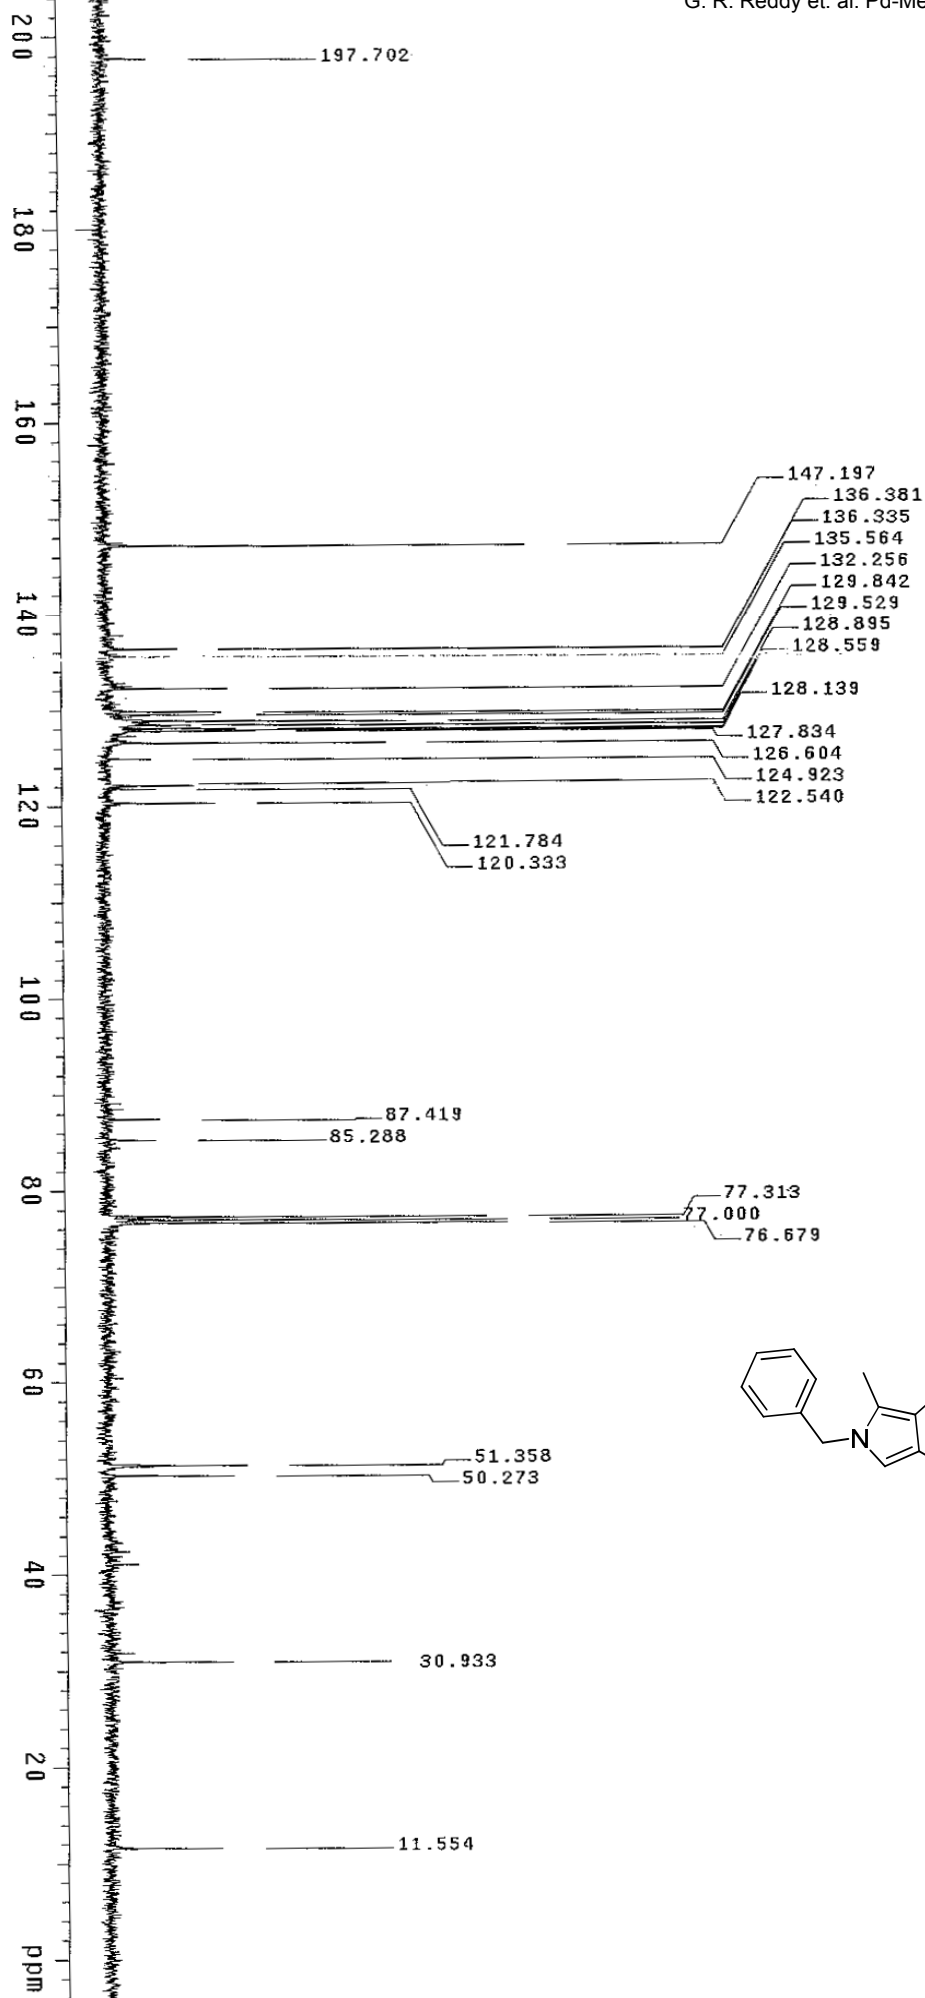

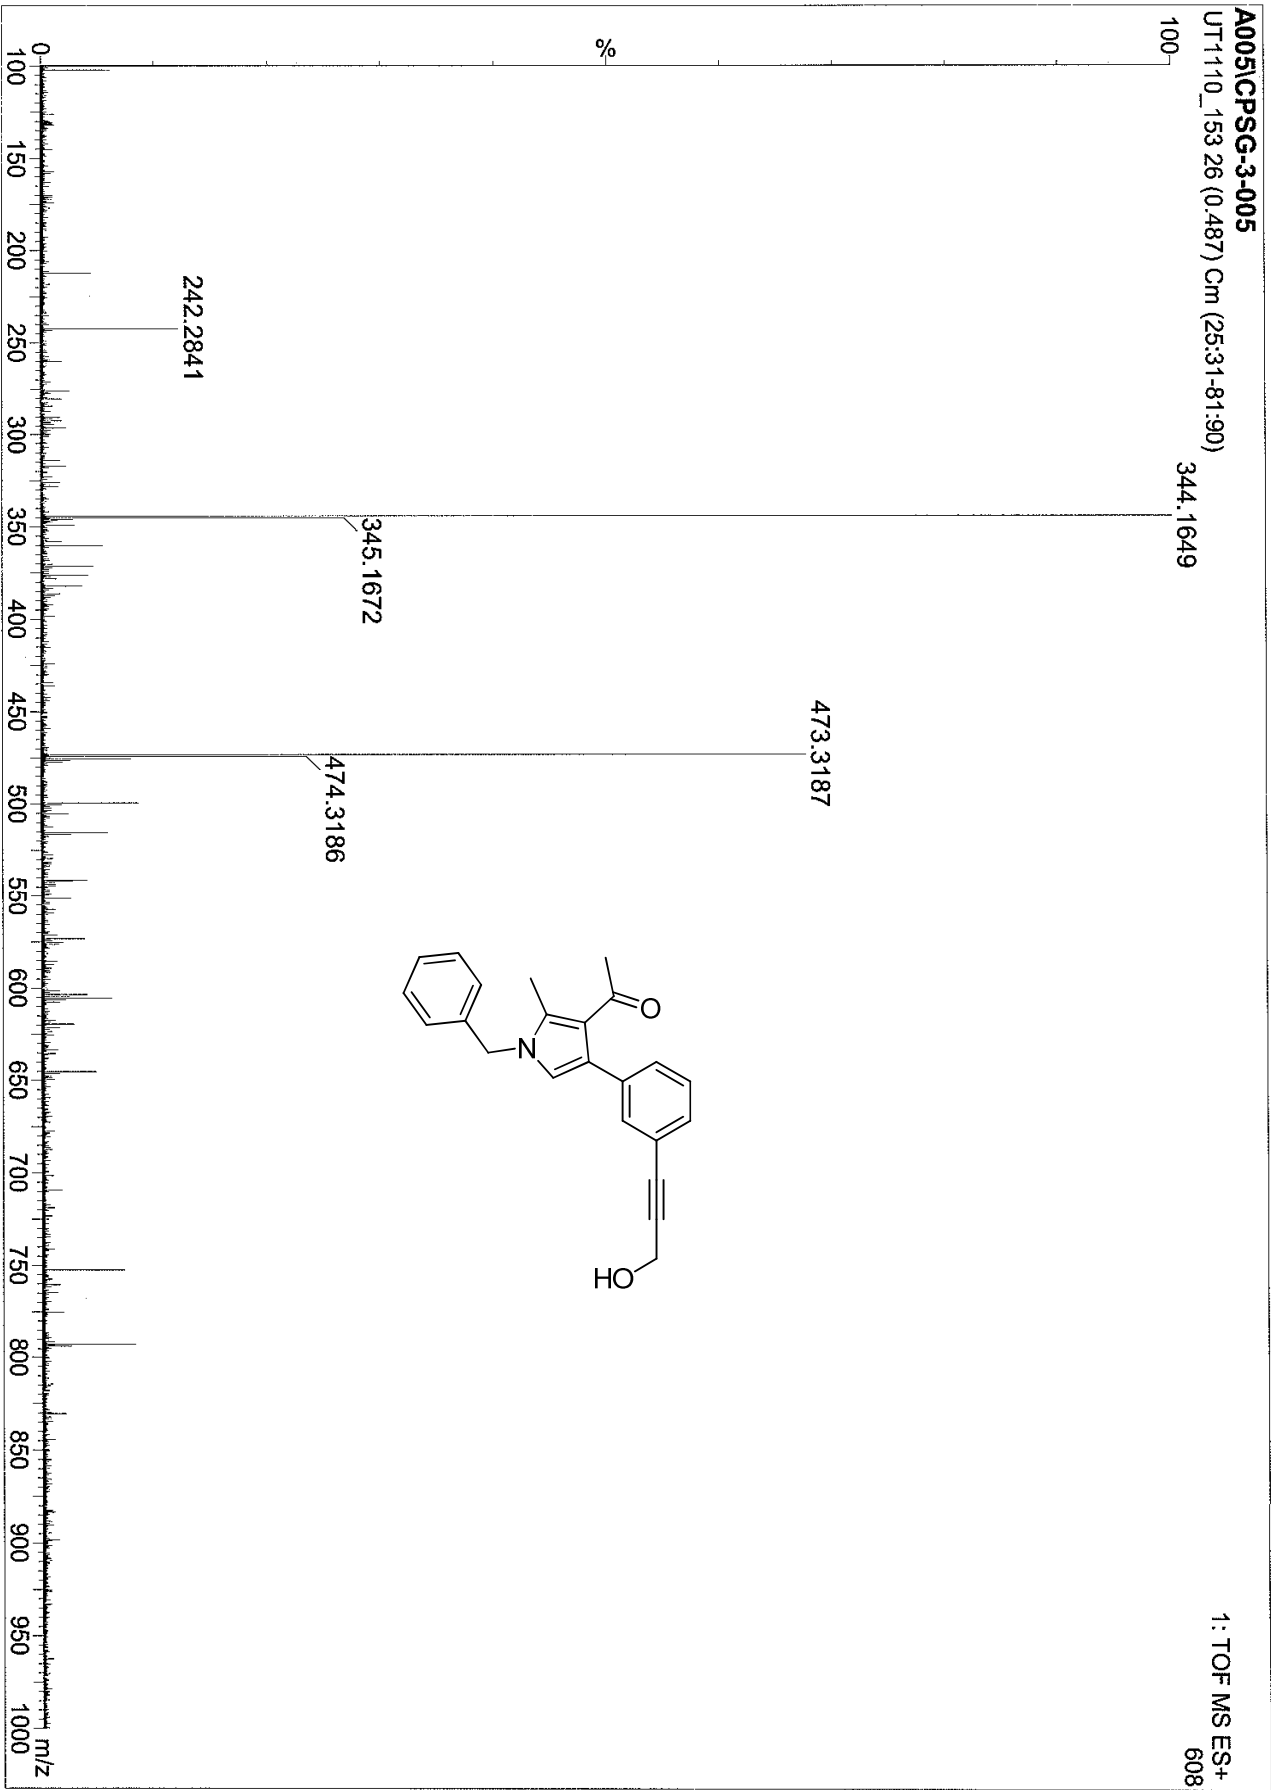



## Elemental Composition Report

## Single Mass Analysis

Tolerance = 5.0 PPM / DBE: min = -1.0, max = 80.0

**Effort prediction: Off**

Number of isotope peaks used for i-FIT = 2

### Monoisotopic Mass, Even Electron Ions

83 formula(e) evaluated with 1 results within limits (up to 4 best isotopic matches for each mass)

Elements Used:

~~ADD05\CPSSG-3-005~~

U<sup>B</sup>1110\_153 26 (0.487) Cm (25:31-81:90)

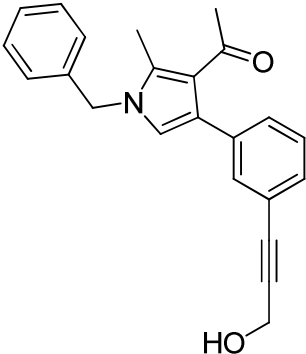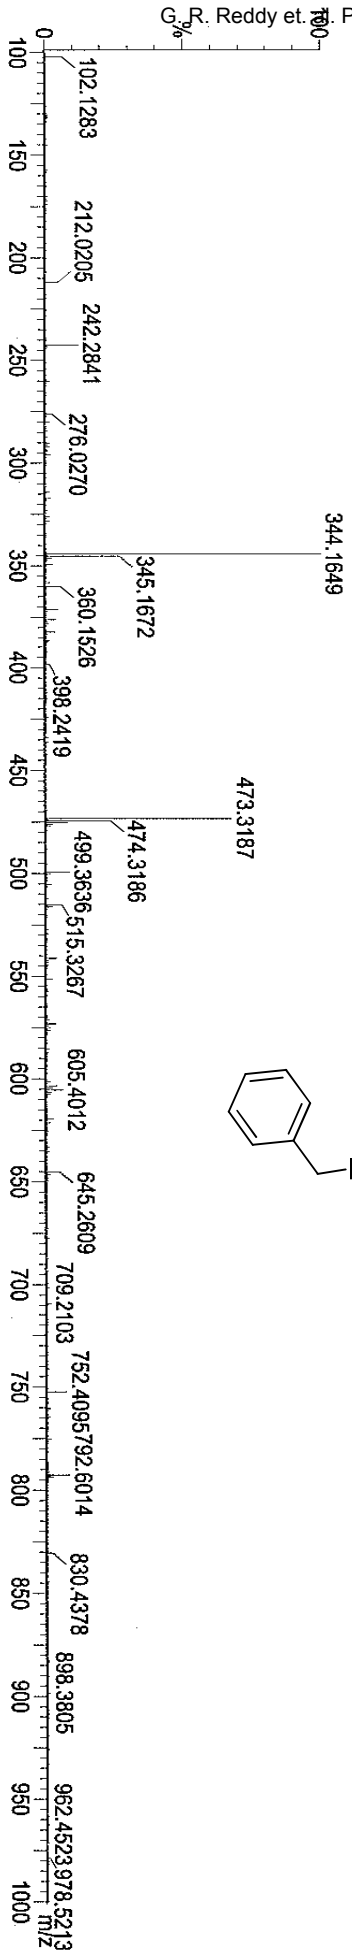

| Minimum:<br>Maximum: | 5.0        | 5.0  | -1.0<br>80.0 |      |              |
|----------------------|------------|------|--------------|------|--------------|
| Mass                 | Calc. Mass | mDa  | PPM          | DBE  | i-FTT        |
| 344.1649             | 344.1651   | -0.2 | -0.6         | 13.5 | 0.0          |
|                      |            |      |              |      | C23 H22 N O2 |

A005-CPSG-4-009 in CDCl3  
NMR-400

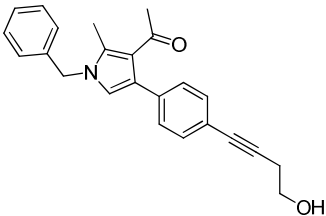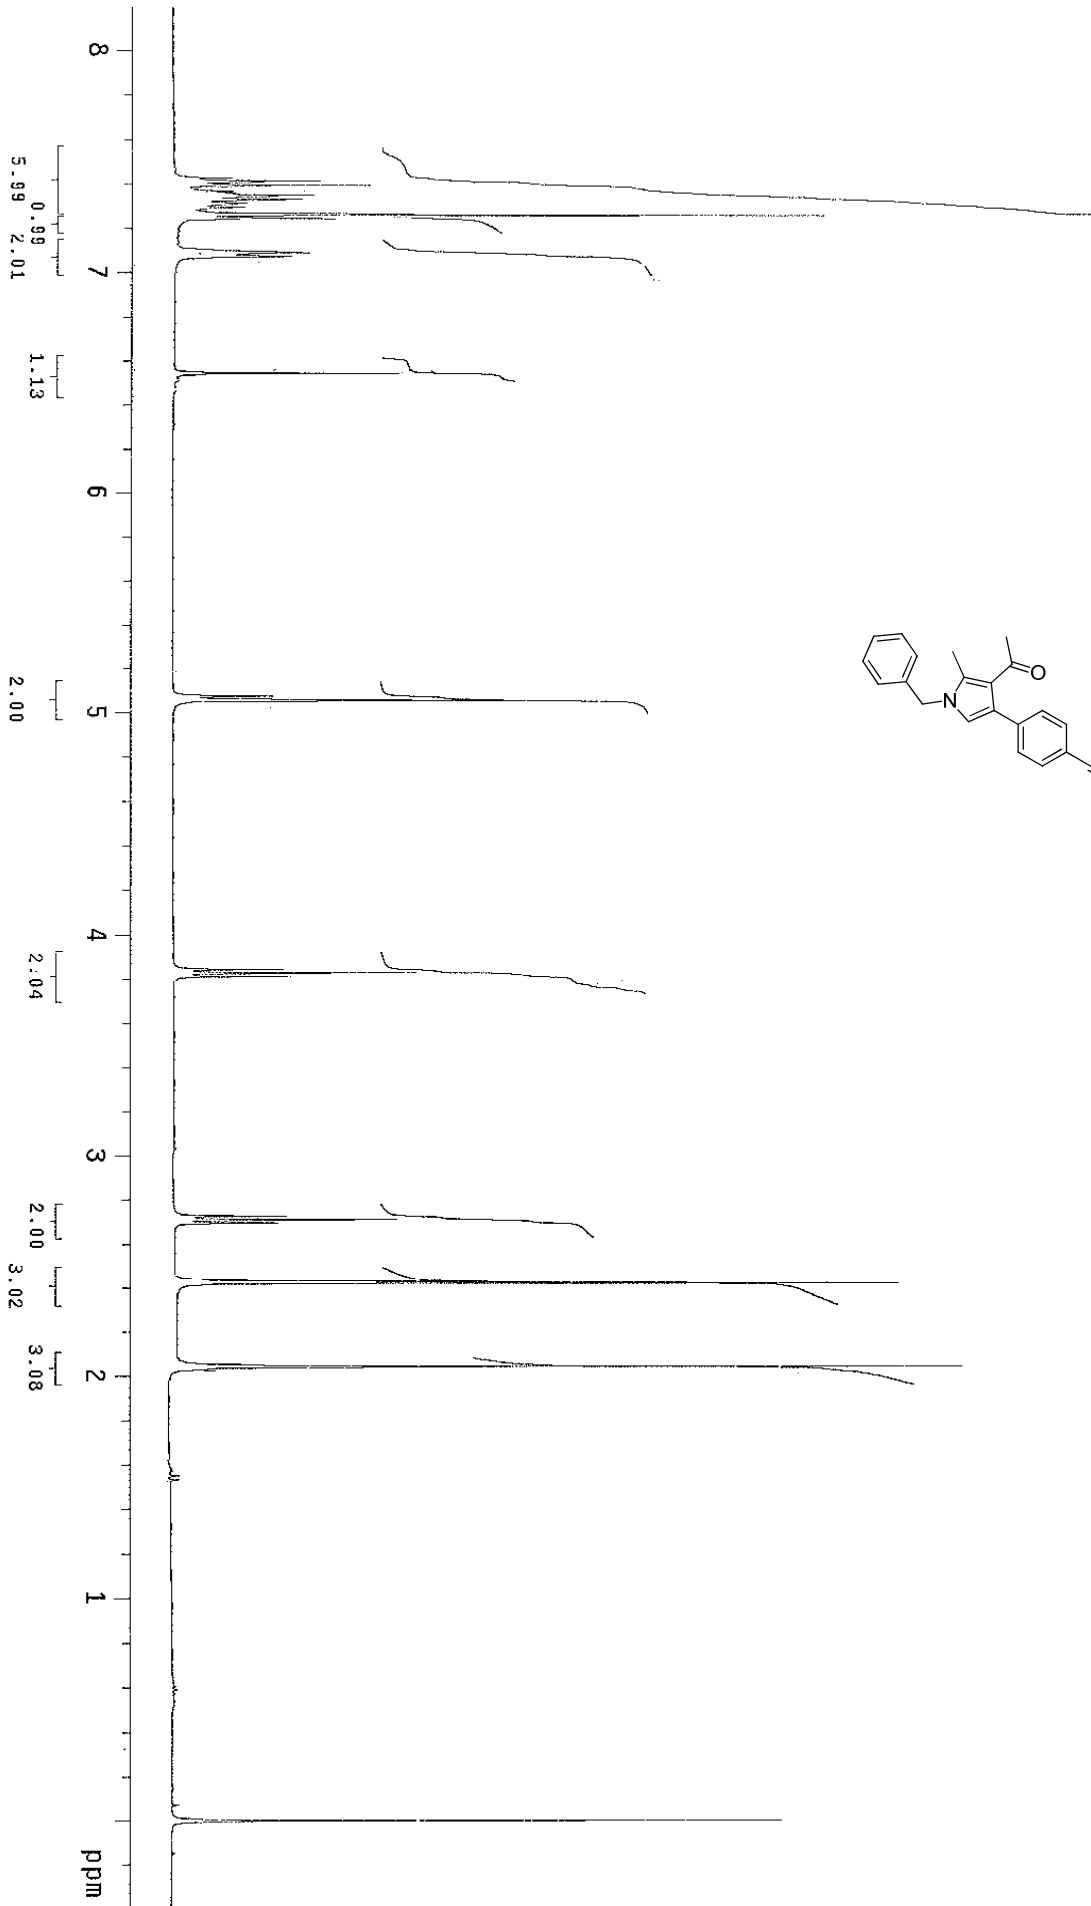

A005-CPSG-4-009 in CDCl3  
NMR-400

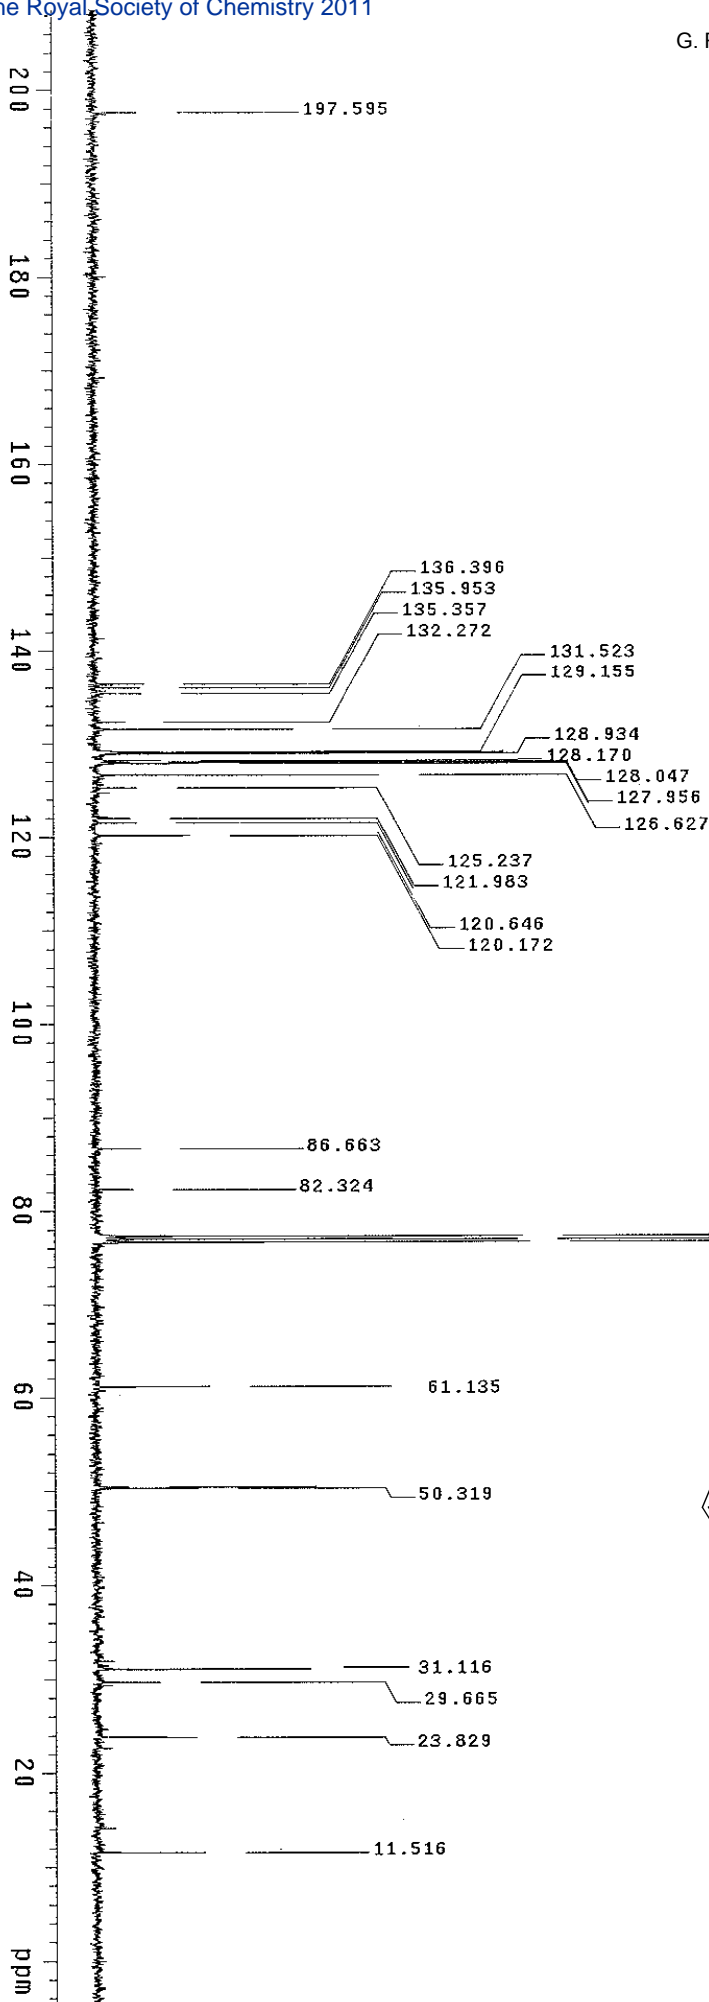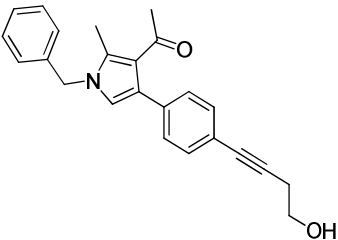

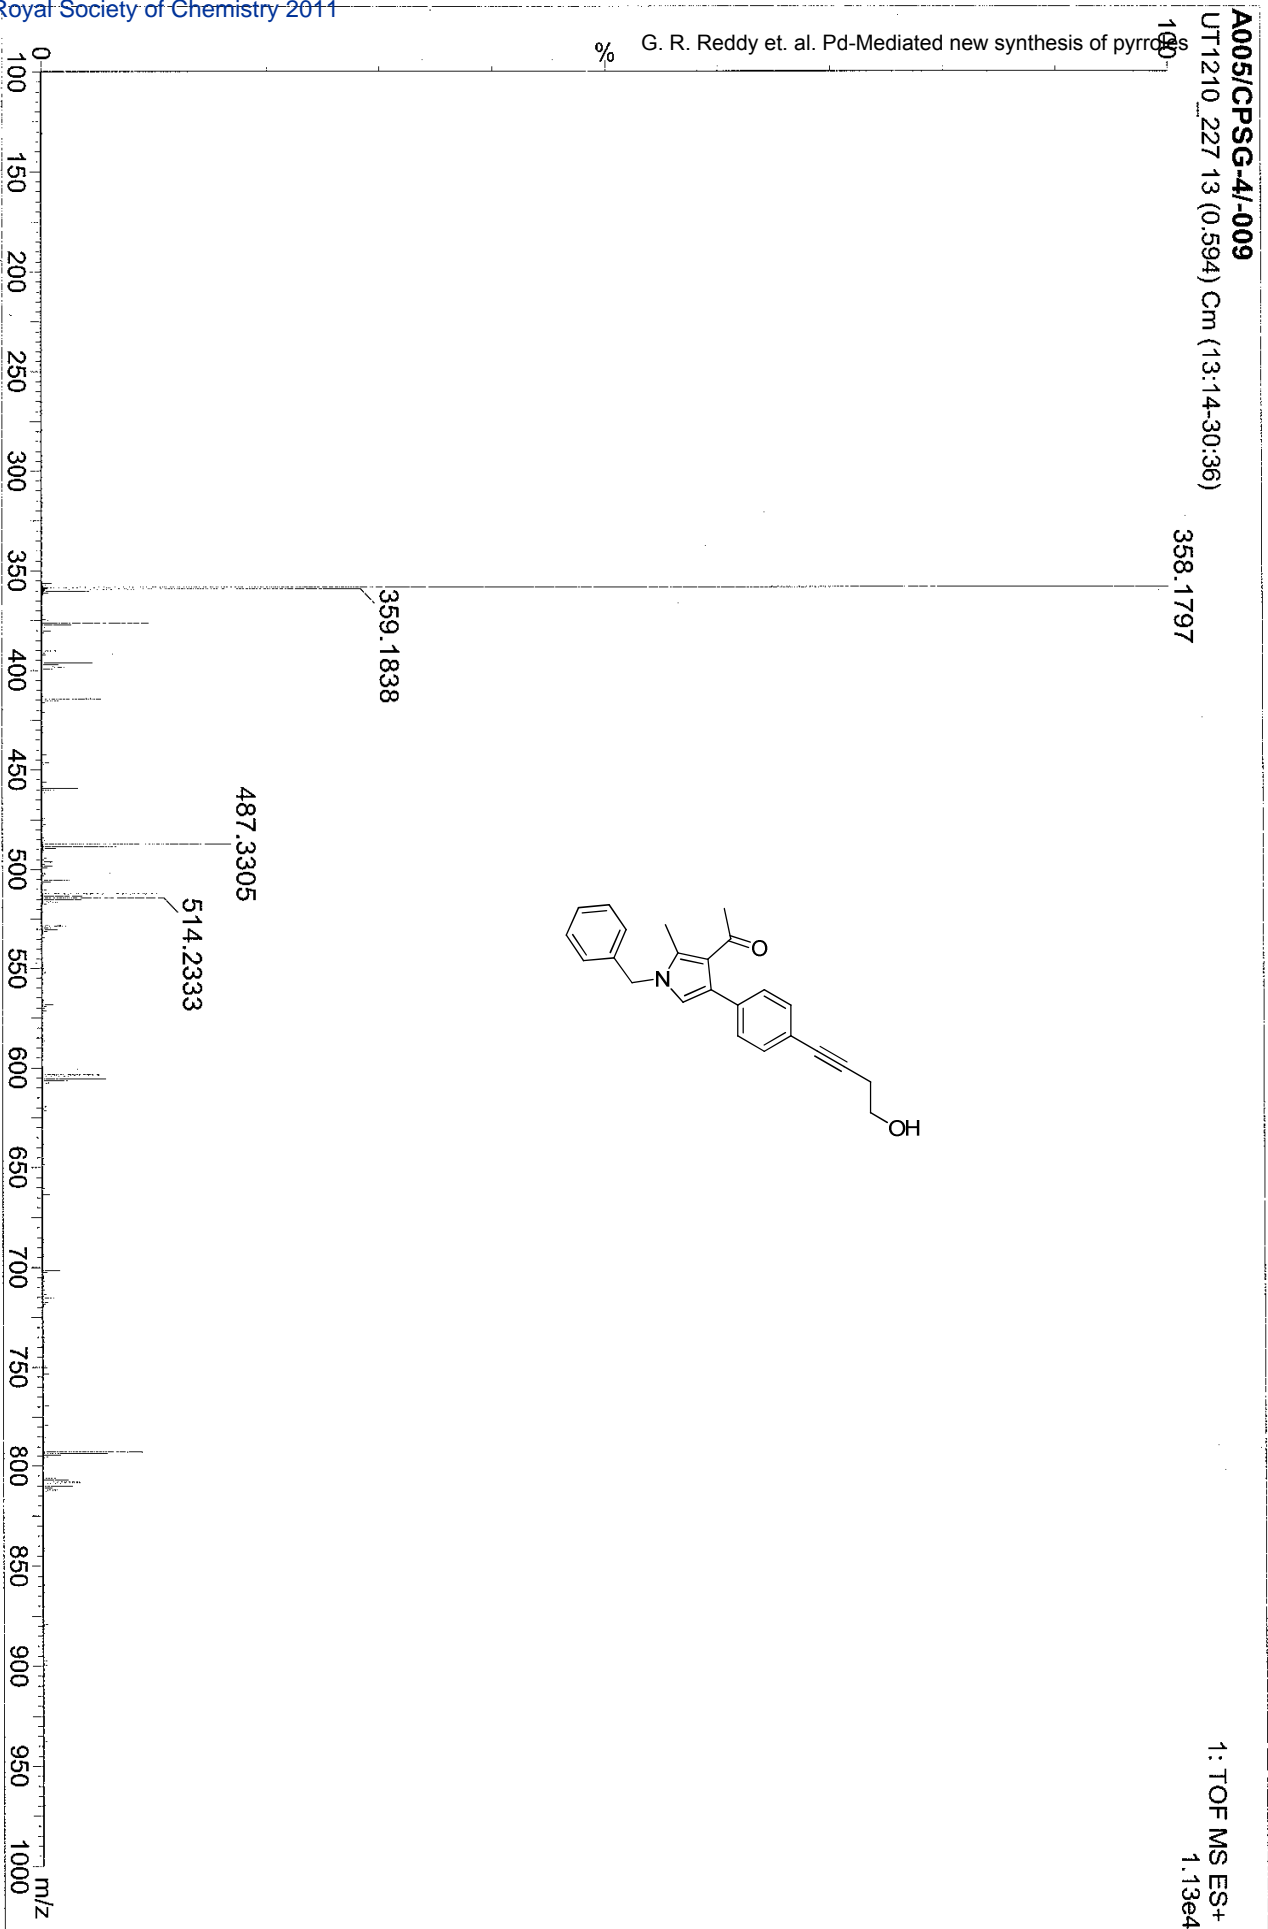

## Elemental Composition Report

### Single Mass Analysis

Tolerance = 20.0 PPM / DBE: min = -1.0, max = 80.0

Element prediction: Off

Number of isotope peaks used for i-FIT = 3

More isotopic Mass, Even Electron Ions

74 formula(e) evaluated with 1 results within limits (up to 4 best isotopic matches for each mass)

Elements Used:

C: 6-30 H: 0-430 N: 0-3 O: 0-3

A005CPSG-4/-009

UT1210\_227 13 (0.594) Cm (13:14-30:36)

358.1797

Reddy et. al. Pd-Mediated C-H

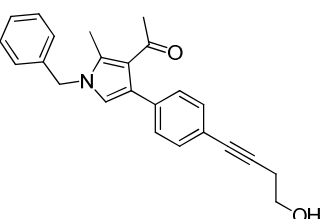

1: TOF MS ES+  
1.13e+004

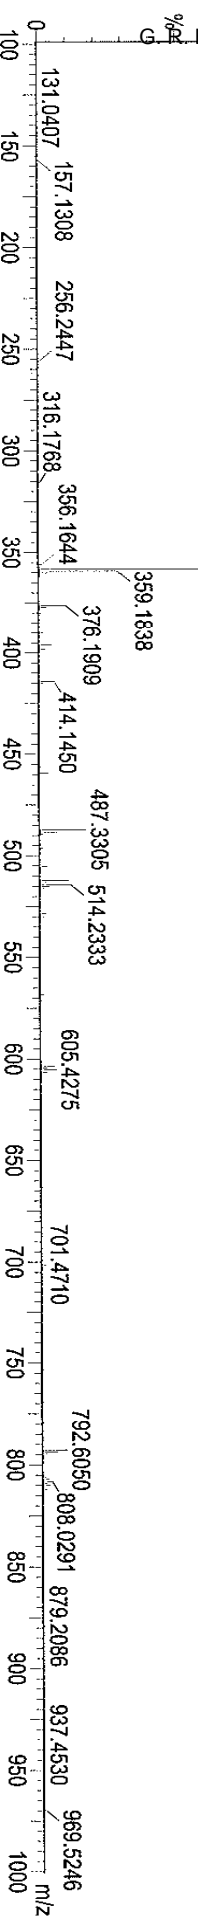

Minimum:

Maximum: 5.0 20.0 -1.0

Mass Calc. Mass mDa PPM DBE i-FIT Formula

358.1797 358.1807 -1.0 -2.8 13.5 1.5 C24 H24 N O2

A005/CPSG-4/010 in CDCl3  
NMR: 500MHz

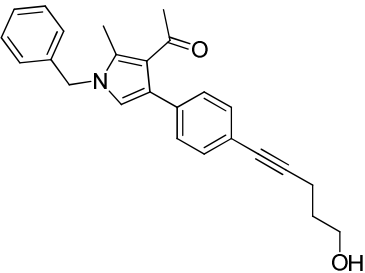

5.01 2.10  
2.06

0.95

2.10

2.00

2.11  
3.01

3.10  
2.09

ppm

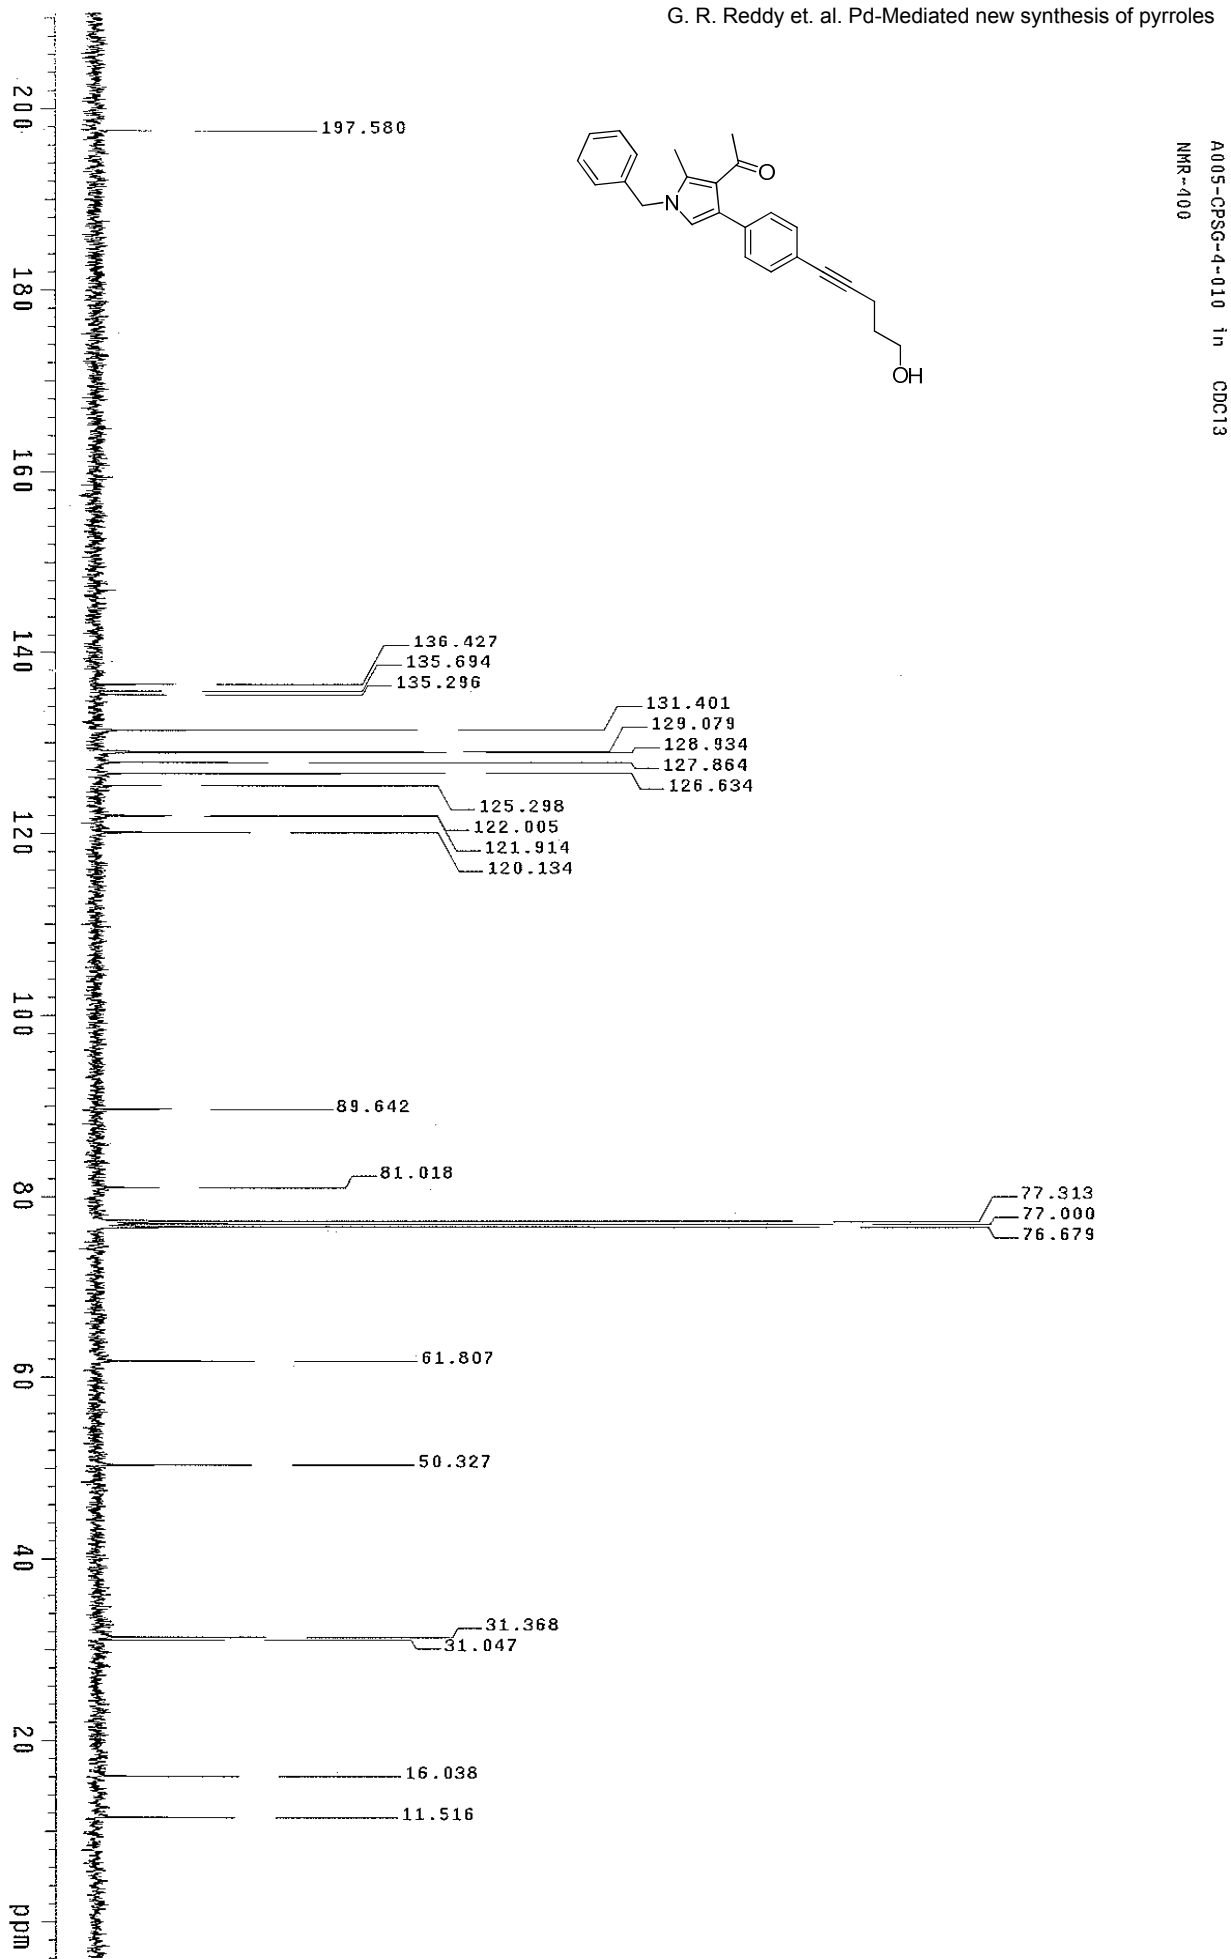

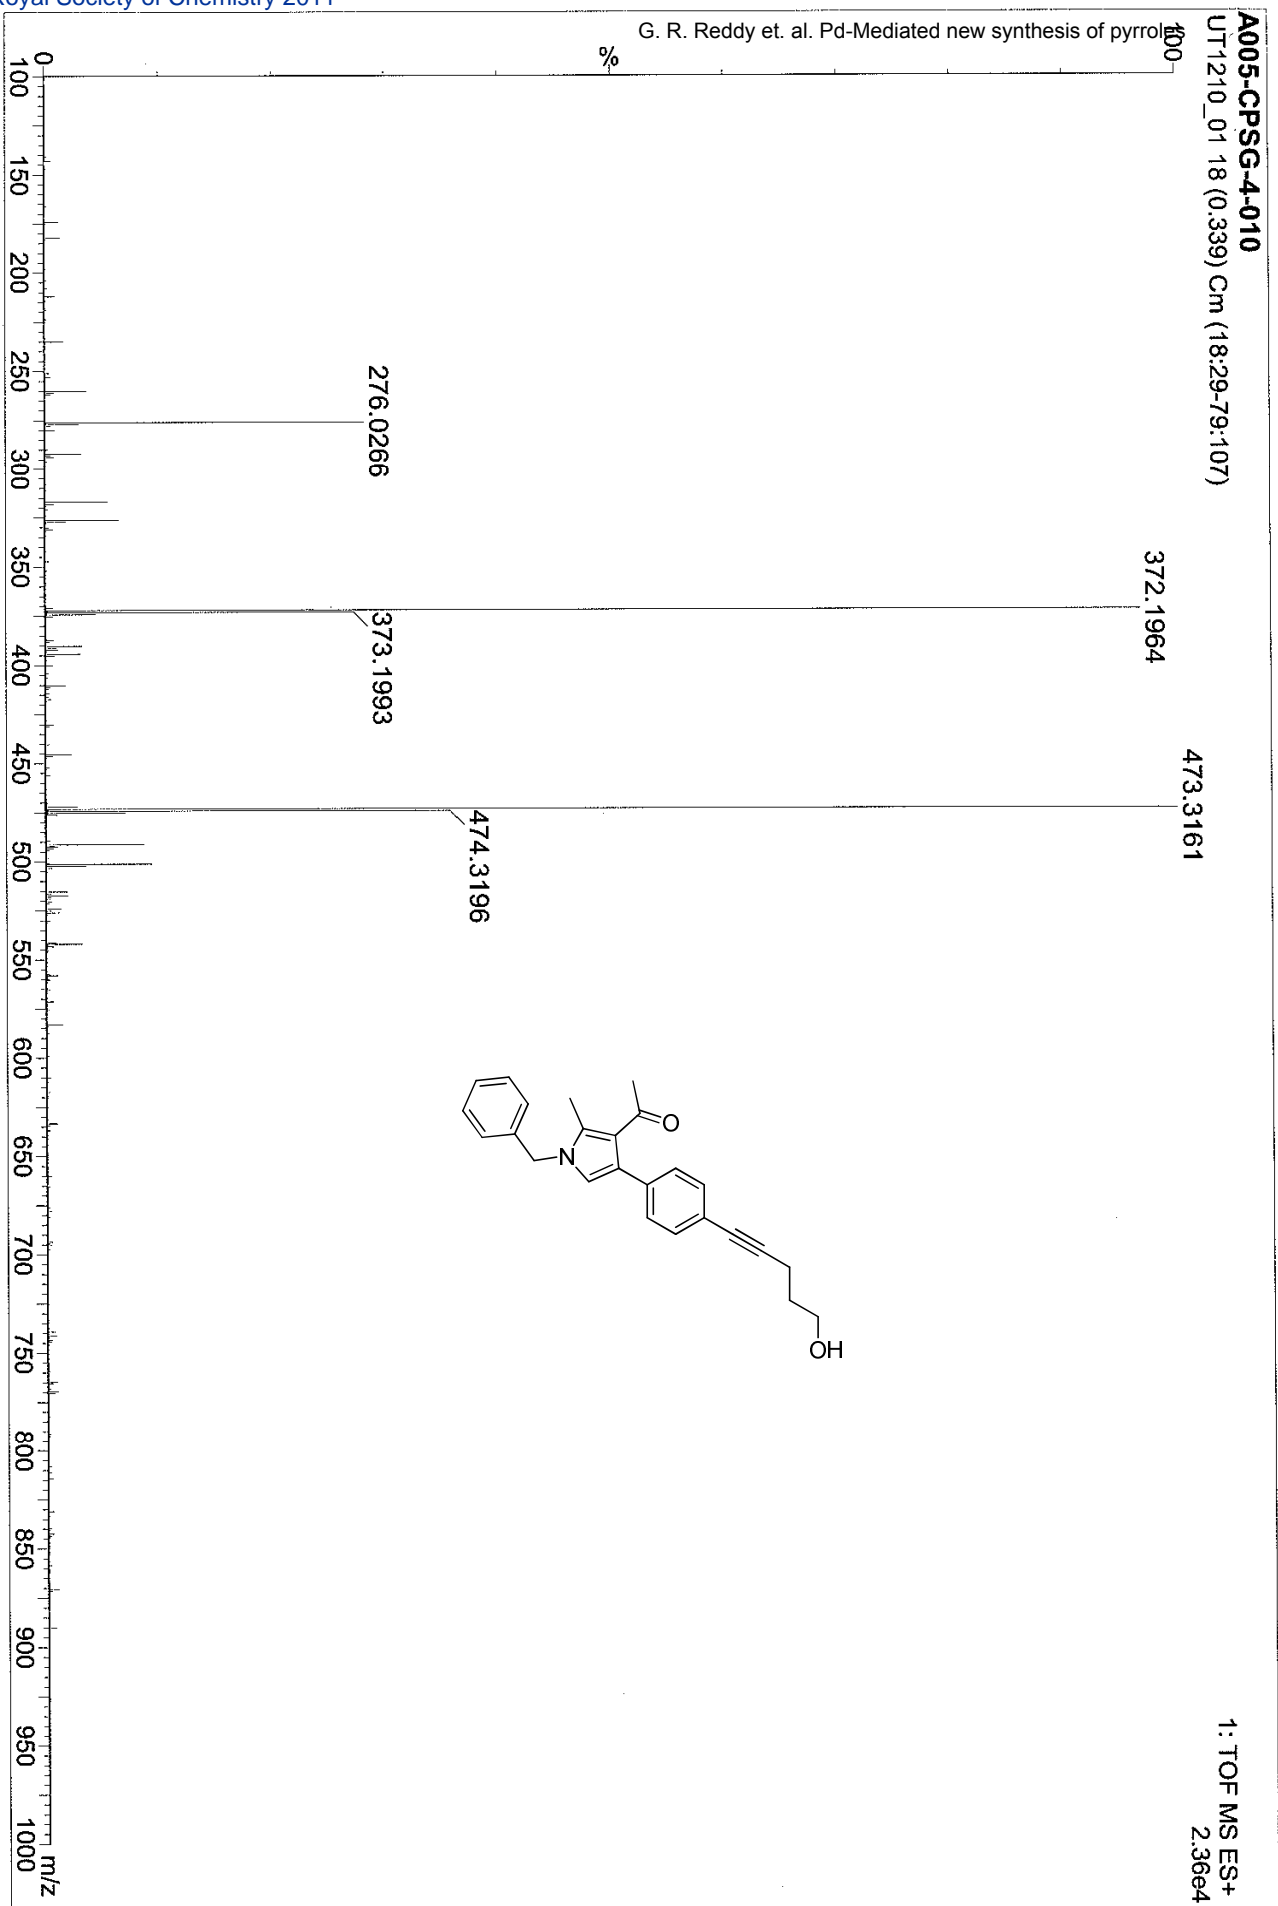



# Elemental Composition Report

## Single Mass Analysis

Tolerance = 5.0 PPM / DBE: min = -1.0, max = 80.0

Element prediction: Off

Number of isotope peaks used for i-FIT = 3

### Monoisotopic Mass, Even Electron Ions

99 formula(e) evaluated with 1 results within limits (up to 4 best isotopic matches for each mass)

**Elements Used:**

Q: 0-40 H: 0-55 N: 0-3 O: 0-4

AD05-CP SG-4-010

1210\_01 18 (0.339) Cm (18:29-79:107)

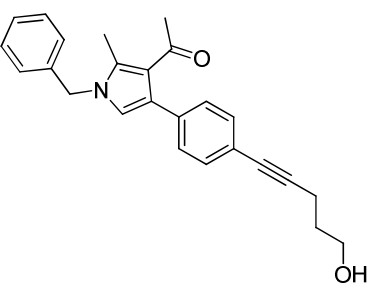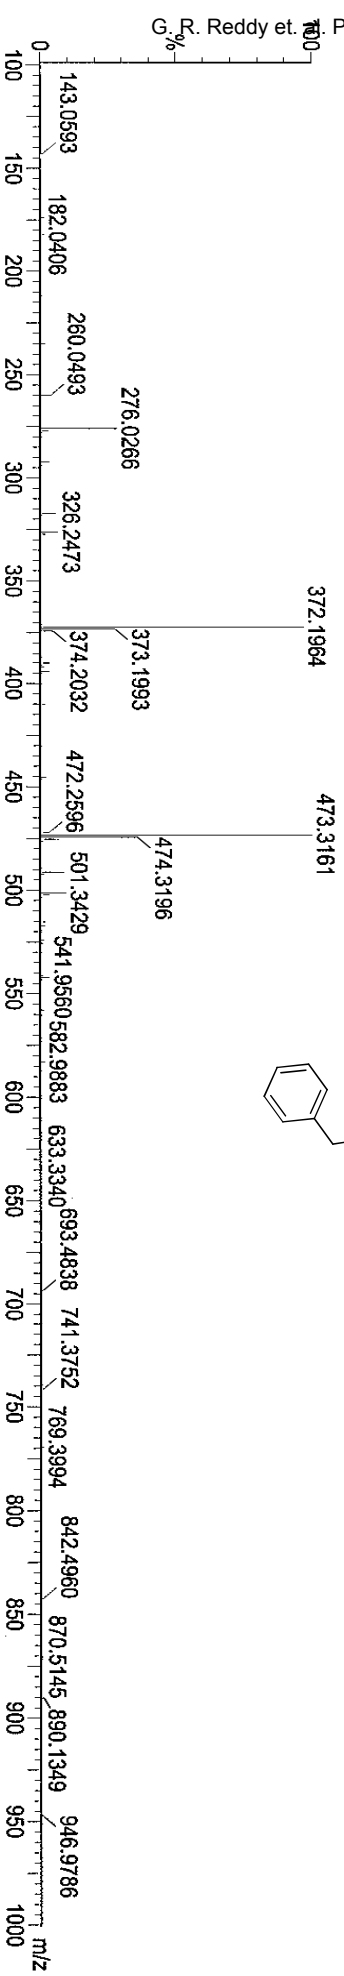

|          |            |     |     |      |       |         |     |      |
|----------|------------|-----|-----|------|-------|---------|-----|------|
| Minimum: |            |     |     | -1.0 |       |         |     |      |
| Maximum: |            |     | 5.0 | 5.0  | 80.0  |         |     |      |
| Mass     | Calc. Mass | mDa | PPM | DBE  | i-FIT | Formula |     |      |
| 372.1964 | 372.1964   | 0.0 | 0.0 | 13.5 | 2.3   | C25     | H26 | N O2 |

A005/CPSG-4/011 in CDCl3  
NMR-400

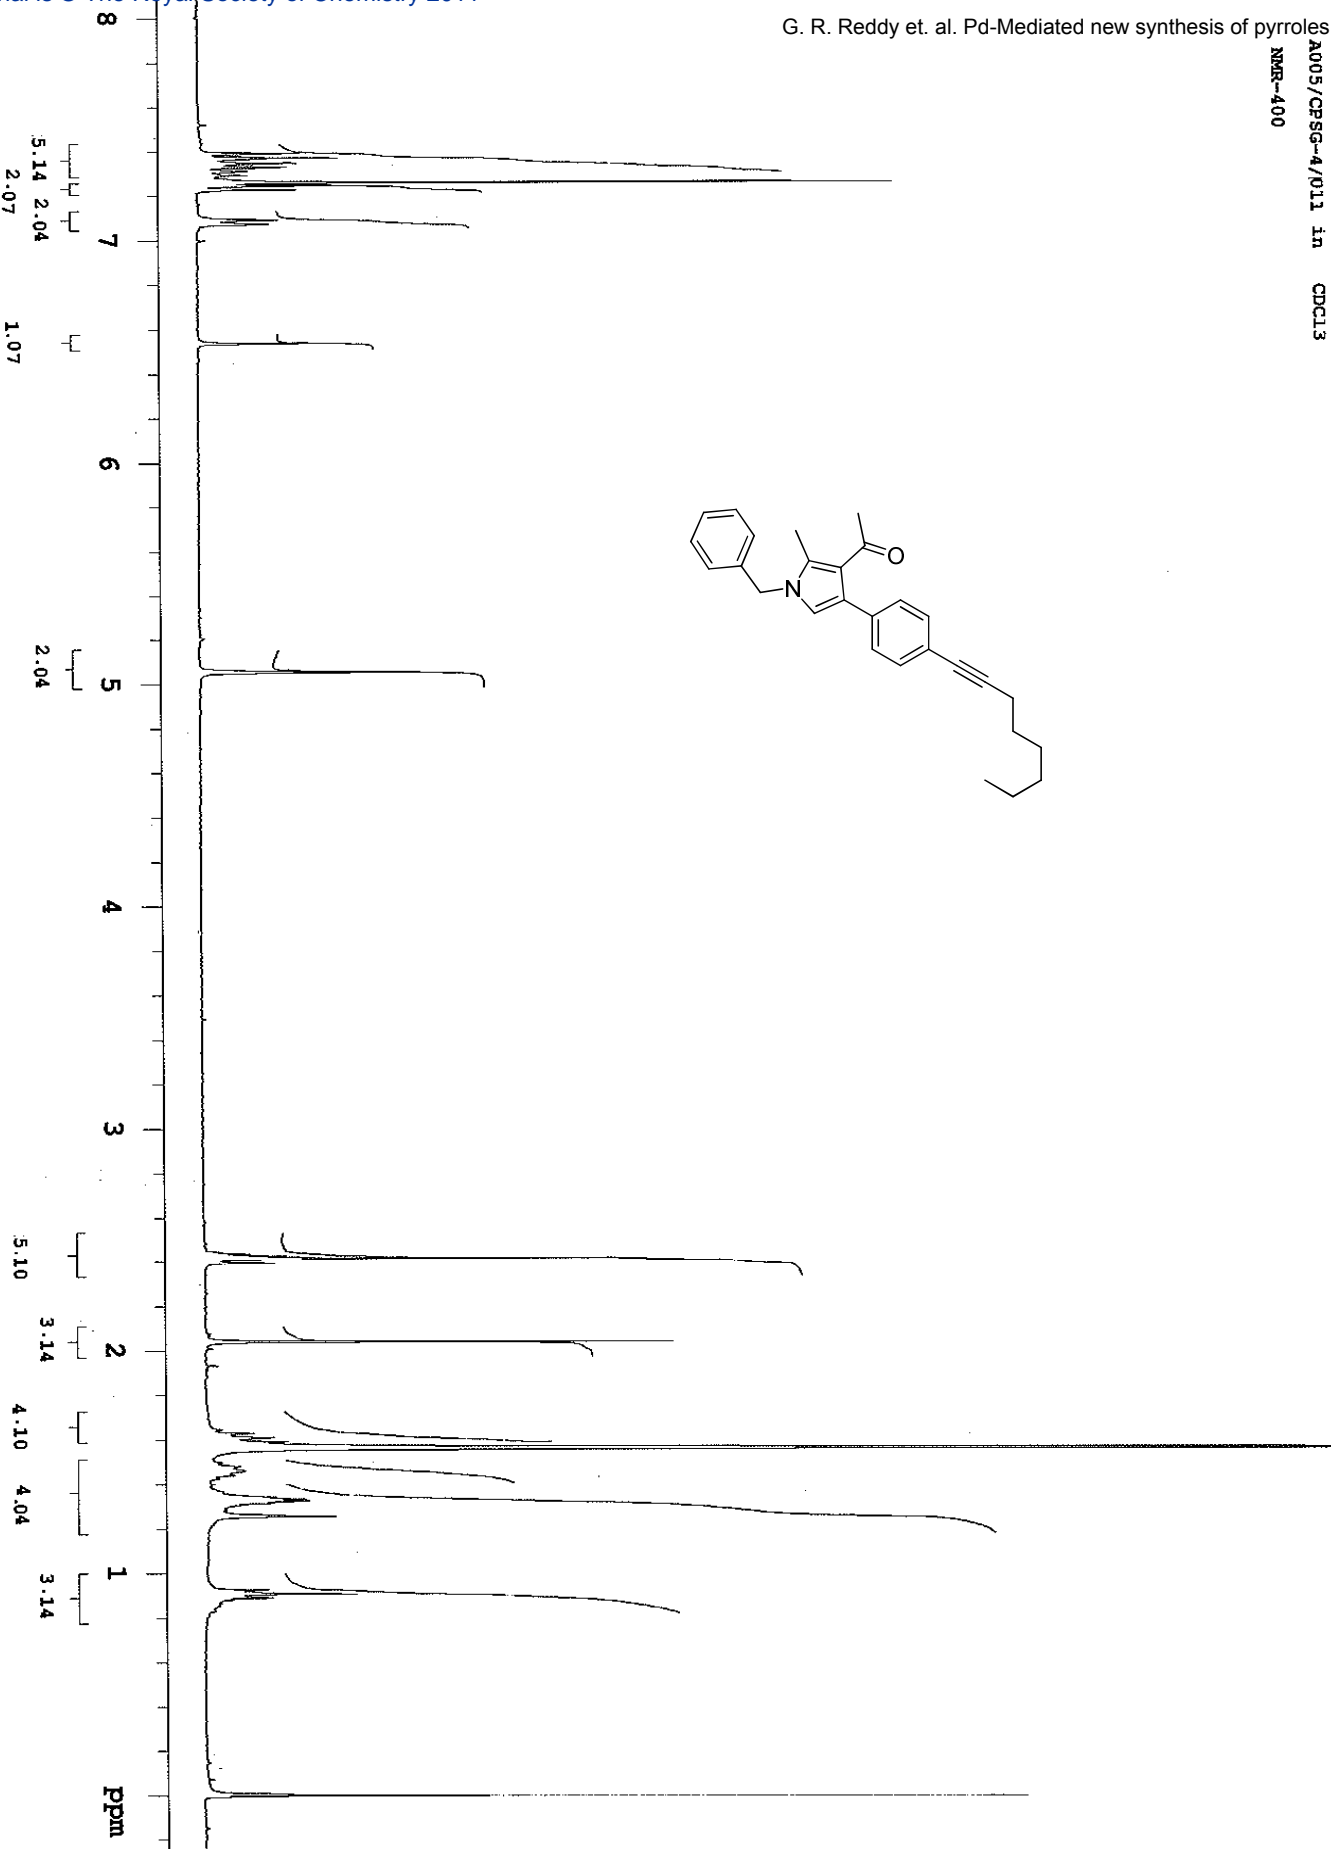

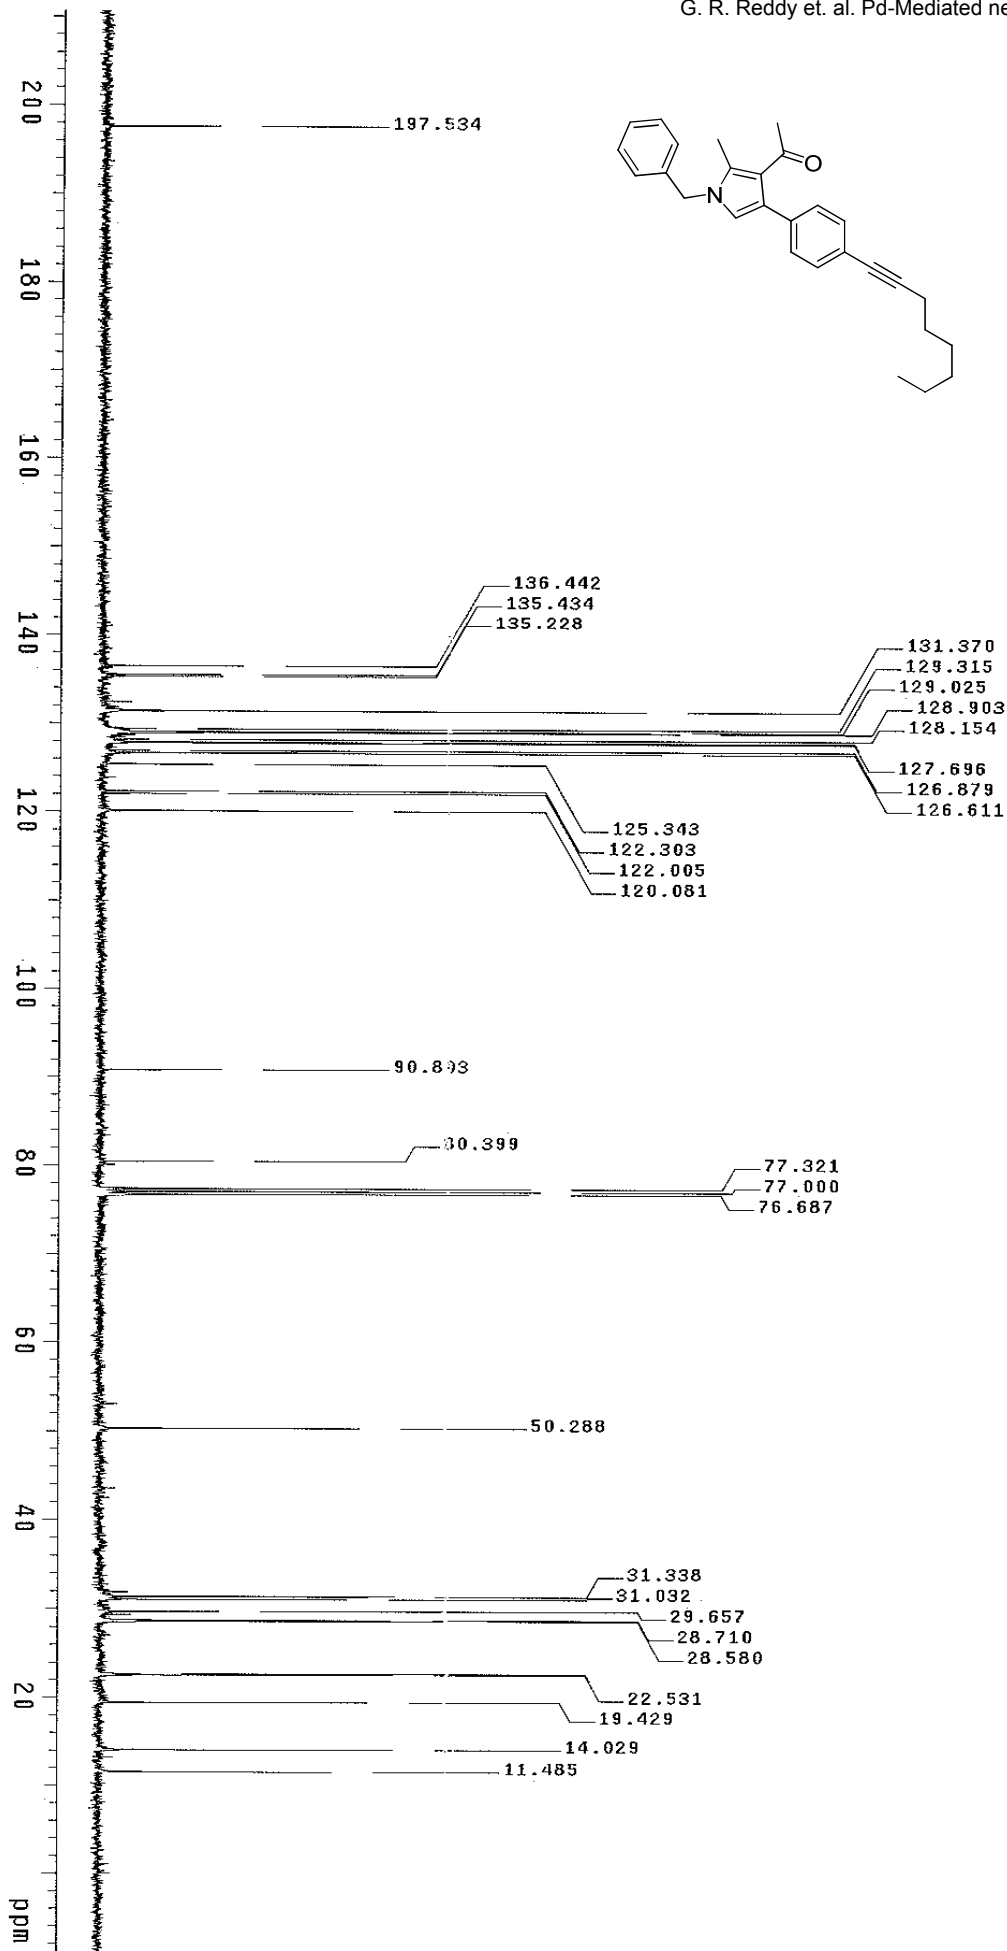

A005-CPSG-4-011 in CDCl<sub>3</sub>  
NMR-400

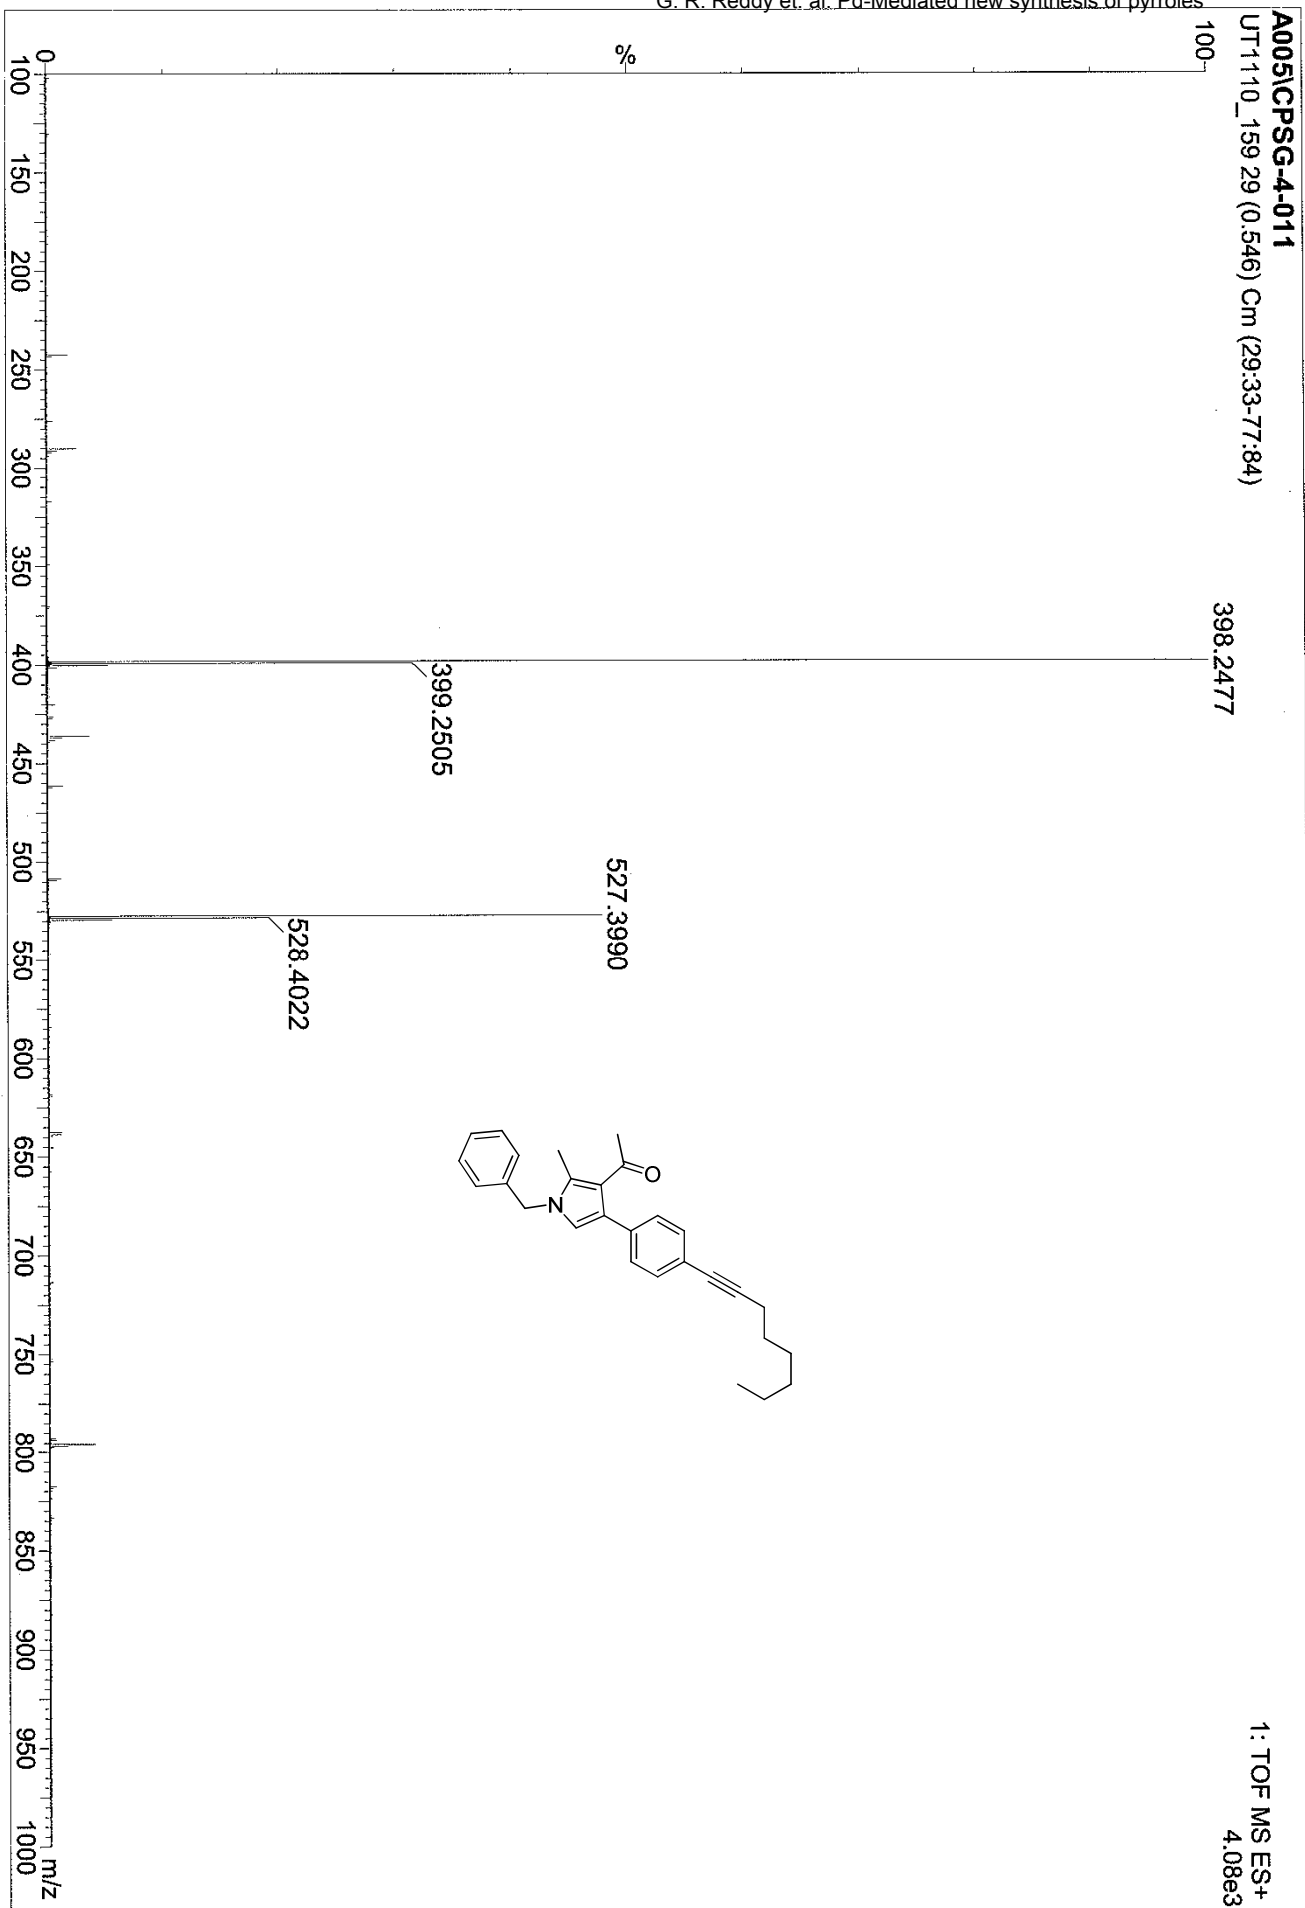

## Elemental Composition Report

### Single Mass Analysis

Tolerance = 5.0 PPM / DBE: min = -1.0, max = 80.0

Element prediction: Off

Number of isotope peaks used for i-FIT = 2

Monoisotopic Mass, Even Electron Ions

177 formula(e) evaluated with 1 results within limits (up to 4 best isotopic matches for each mass)

Elements Used:

C: 0-45 H: 0-65 N: 0-5 O: 0-5

A005CPSG-4-011

BT1110\_159.29 (0.546) Cm (29:33-77:84)

1: TOF MS ES+  
4.08e+003

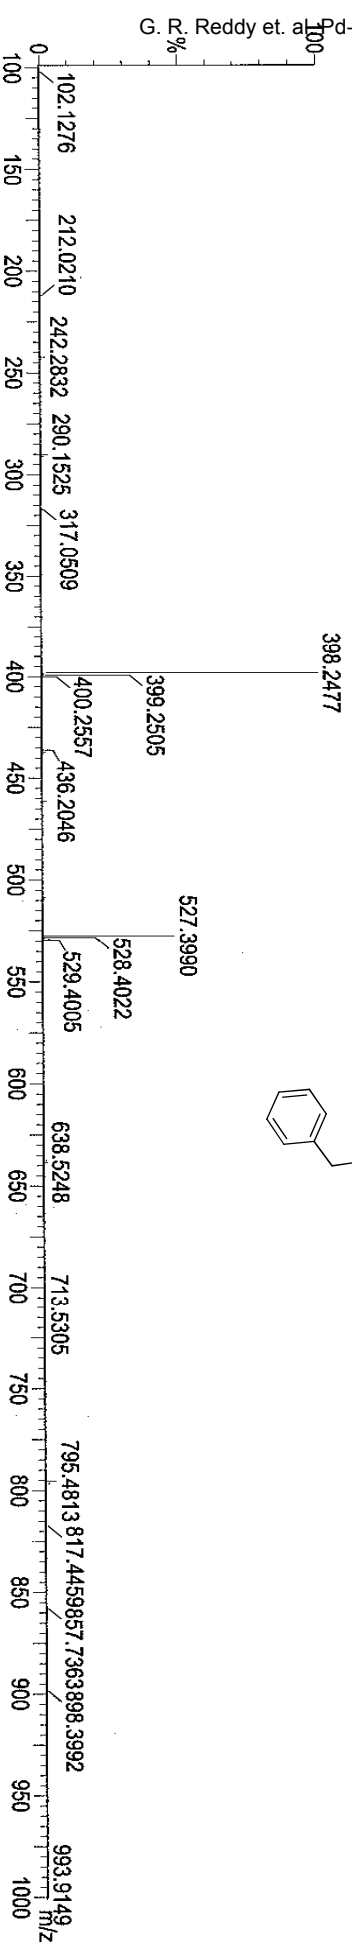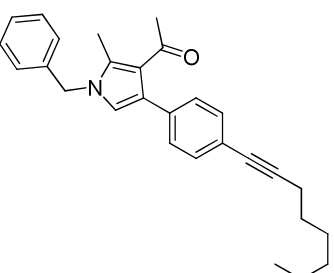

|          |            |      |      |      |             |
|----------|------------|------|------|------|-------------|
| Minimum: |            |      |      |      | -1.0        |
| Maximum: |            | 5.0  | 5.0  | 80.0 |             |
| Mass     | Calc. Mass | mDa  | PPM  | DBE  | i-FIT       |
| 398.2477 | 398.2484   | -0.7 | -1.8 | 13.5 | 0.3         |
|          |            |      |      |      | Formula     |
|          |            |      |      |      | C28 H32 N O |

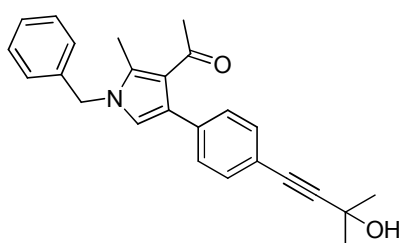

2.04 2.04  
4.00-98

1.00

2.04

3.04 3.15 6.15

ppm

A005-CPS6-4-012 In CDCl3  
NMR-400

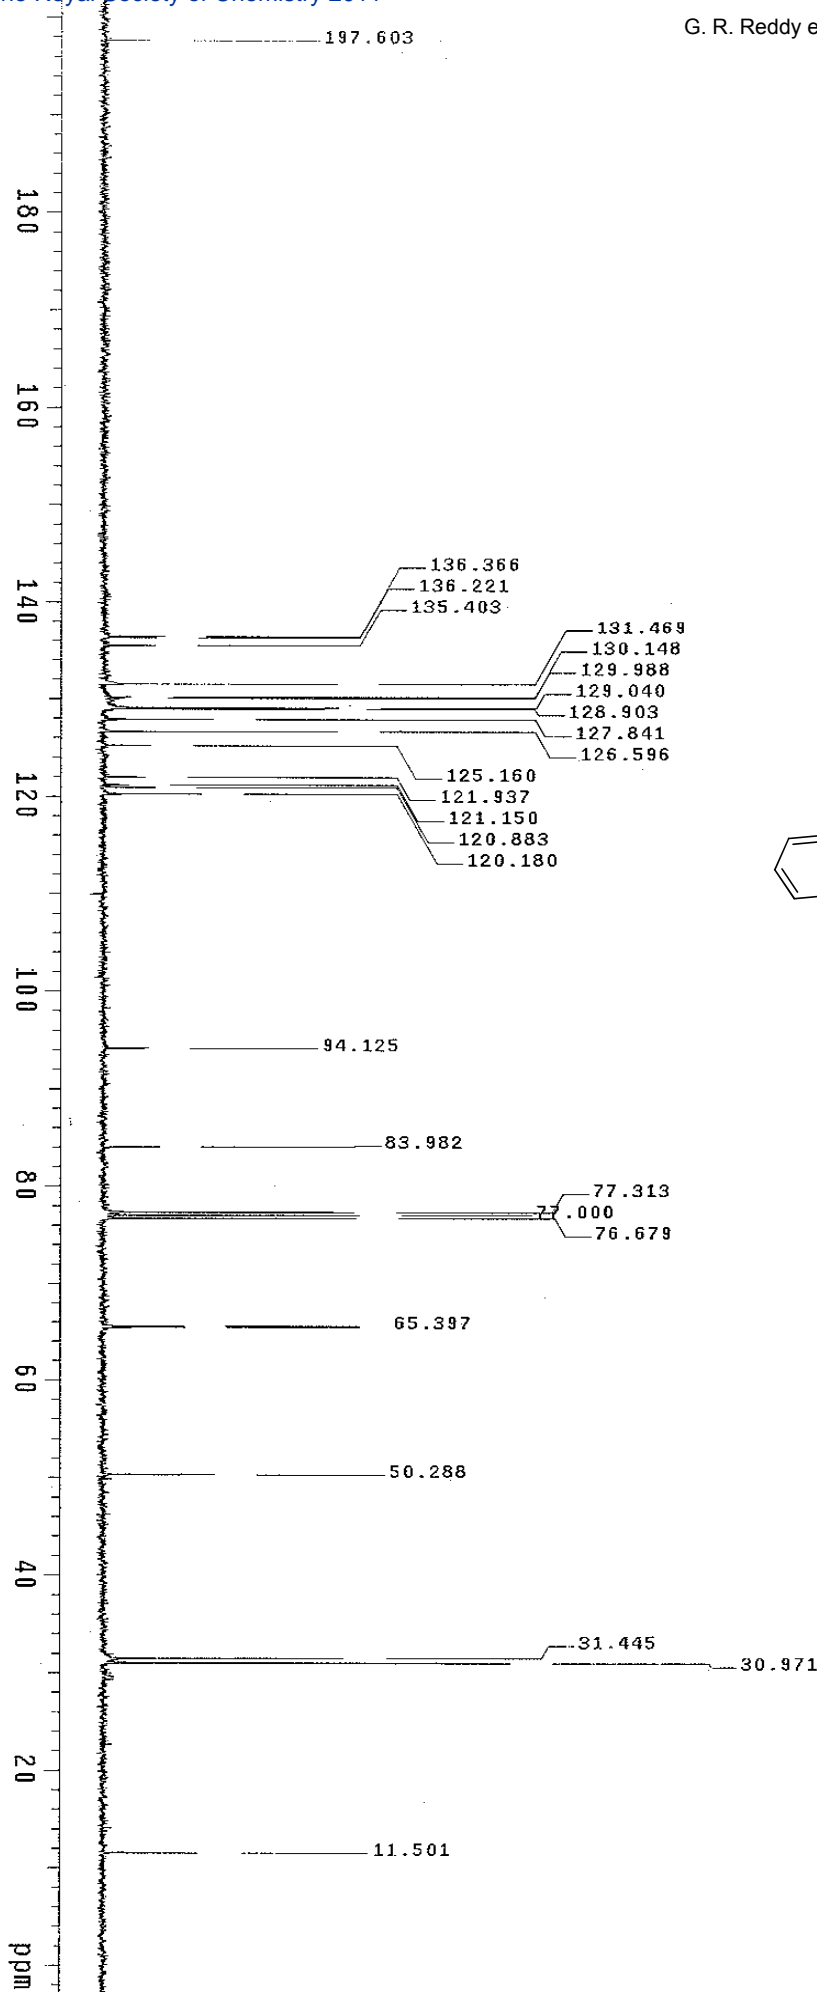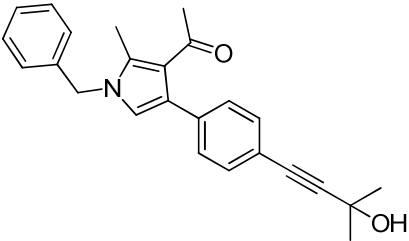

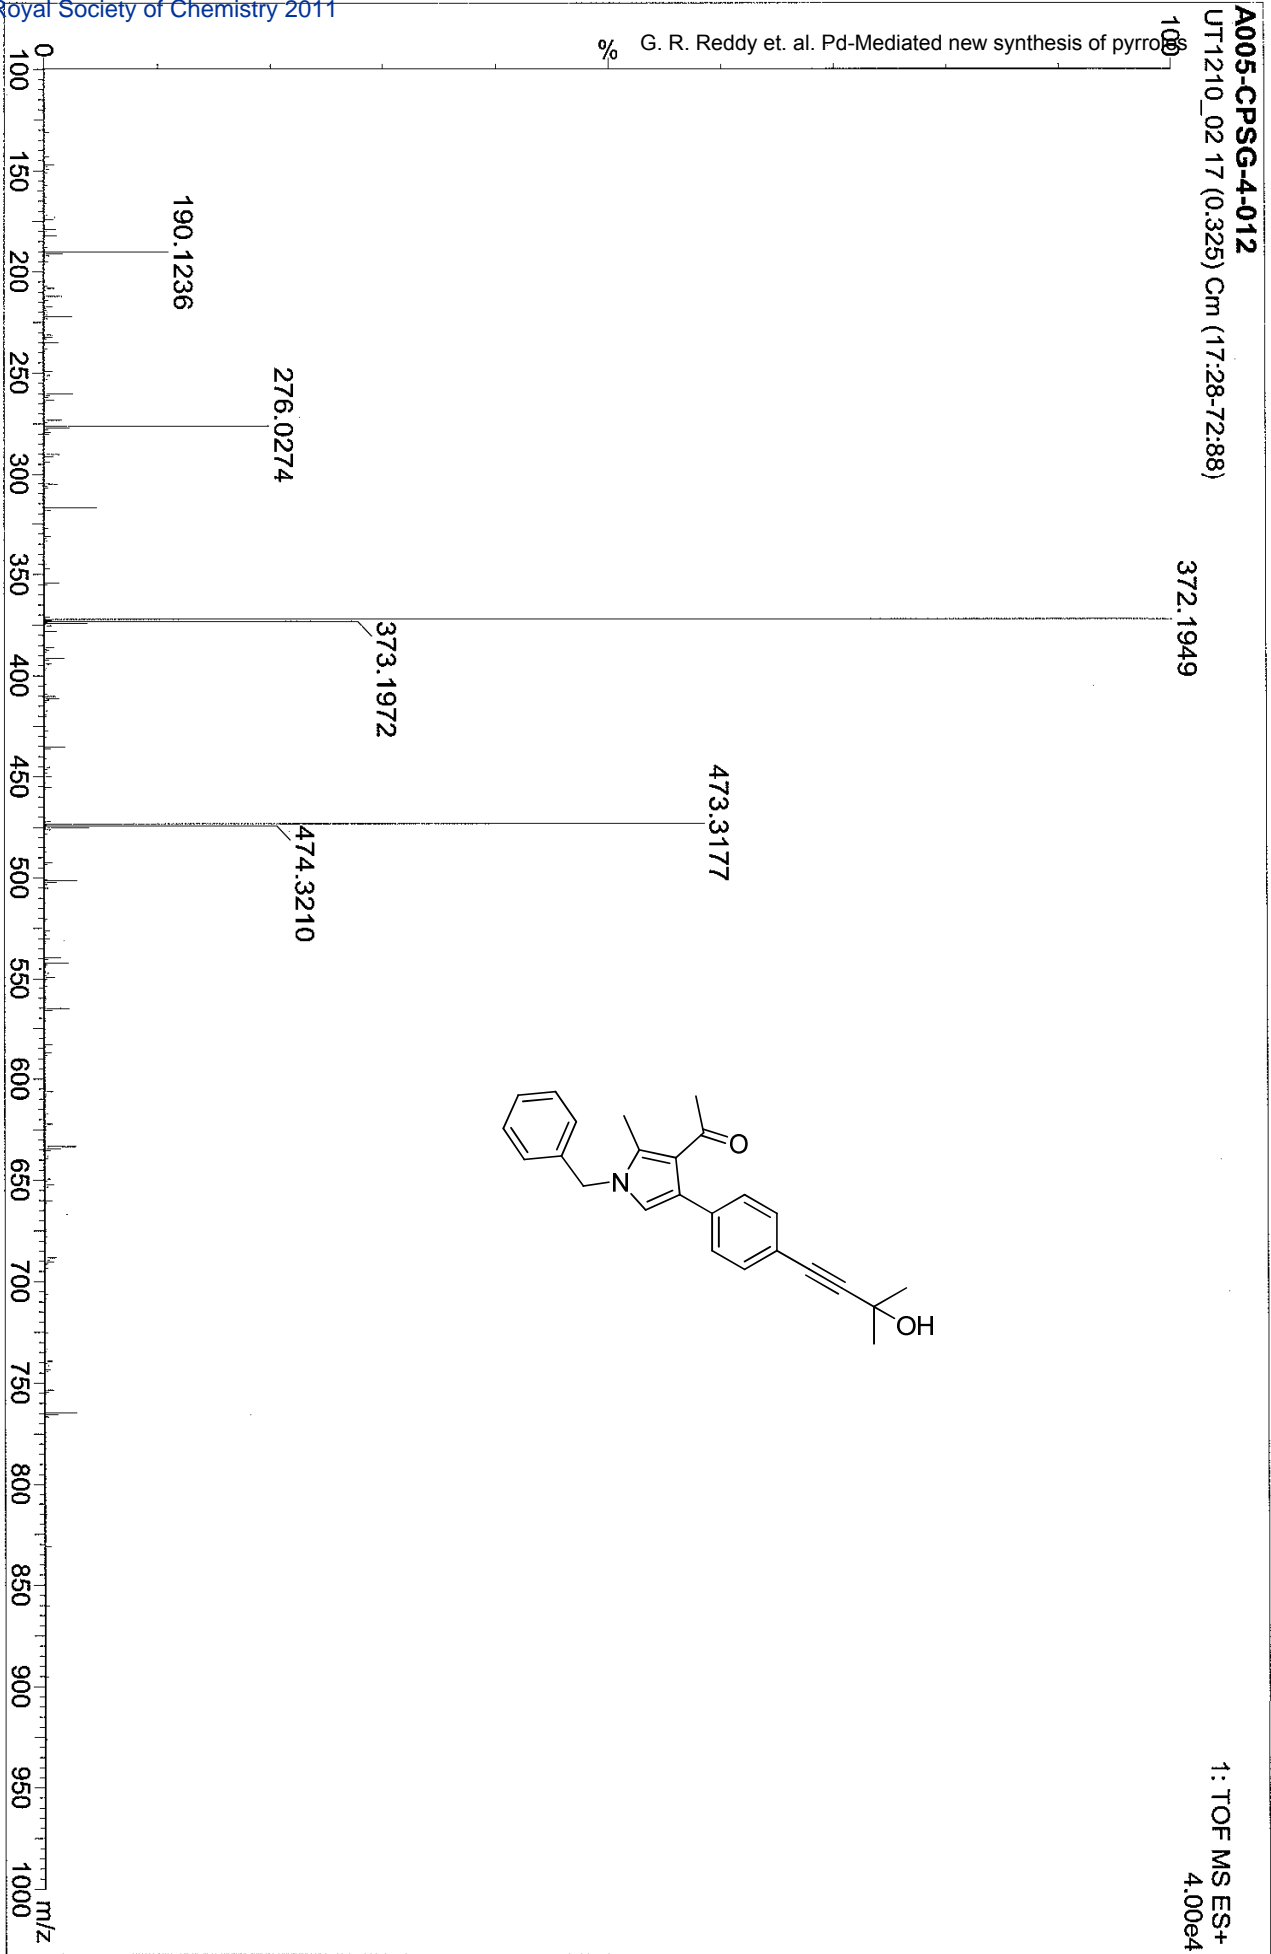



# Elemental Composition Report

## Single Mass Analysis

Tolerance = 5.0 PPM / DBE: min = -1.0, max = 80.0

Element prediction: Off

Number of isotope peaks used for i-FIT = 3

More isotopic Mass, Even Electron Ions

90 formula(e) evaluated with 1 results within limits (up to 4 best isotopic matches for each mass)

Elements Used:

C: 0-40 H: 0-55 N: 0-3 O: 0-4

A0005.CPSG-4-012

UT1210\_02 17 (0.325) Cm (17:28-72:88)

1: TOF MS ES+  
4.00e+004

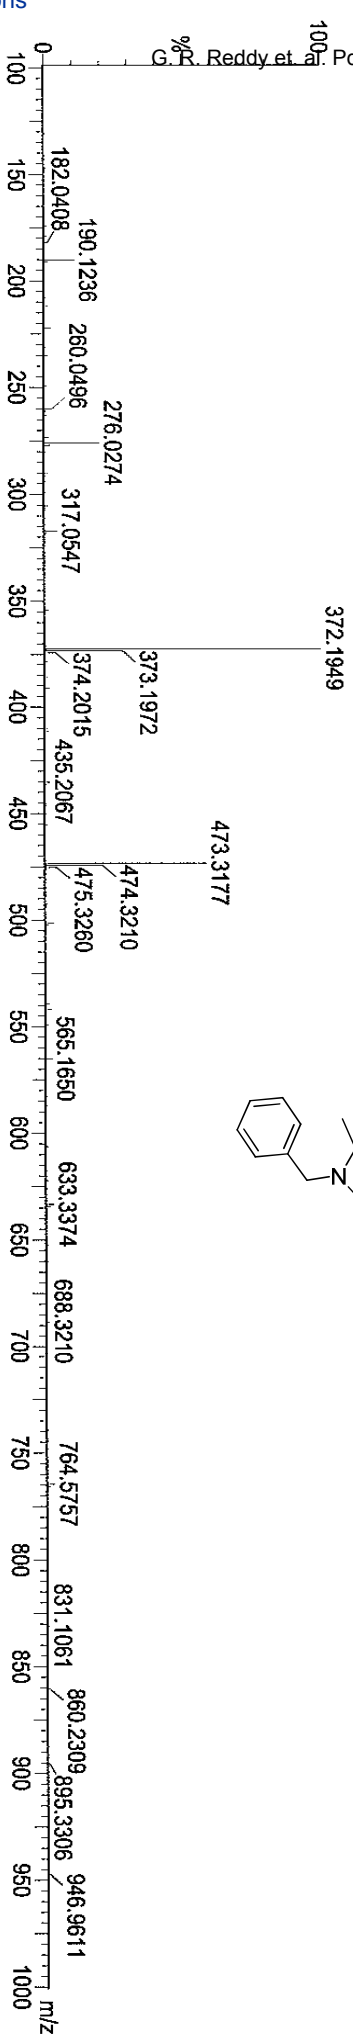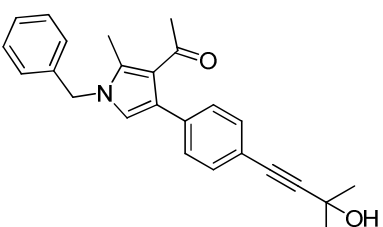

|          |            |      |      |      |              |
|----------|------------|------|------|------|--------------|
| Minimum: |            |      |      |      | -1.0         |
| Maximum: |            |      |      |      | 80.0         |
| Mass     | Calc. Mass | mDa  | PPM  | DBE  | i-FIT        |
| 372.1949 | 372.1964   | -1.5 | -4.0 | 13.5 | 24.1         |
|          |            |      |      |      | C25 H26 N O2 |
